# Supplementary material for: Visible-light induced metal-free intramolecular reductive cyclisations of ketones with alkynes and allenes
Source: Royal Society of Chemistry journal article supplement (doi:10.1039/d2cc06972e), 2023-01-01

*Supporting Information for*

**Visible-Light Induced Metal-Free Intramolecular Reductive Cyclisations of Ketones with  
Alkynes and Allenes**

Nana Tang,<sup>§[a]</sup> Raphael Jonas Zachmann,<sup>§[a]</sup> Hui Xie,<sup>[a]</sup> Jun Zheng,<sup>\*[b]</sup> and Bernhard Breit<sup>\*[a]</sup>

[a] Institut für Organische Chemie, Albert-Ludwigs-Universität Freiburg, Albertstraße 21, 79104

Freiburg im Breisgau, Germany

E-mail: [bernhard.breit@chemie.uni-freiburg.de](mailto:bernhard.breit@chemie.uni-freiburg.de)

[b] Engineering Research Center of Pharmaceutical Process Chemistry, Ministry of Education; School of Pharmacy, East China University of Science and Technology, 130 Meilong Road, 200237 Shanghai,

China

E-mail: [jz@ecust.edu.cn](mailto:jz@ecust.edu.cn)

**Table of Contents**

|                                                       |                 |
|-------------------------------------------------------|-----------------|
| <b>General methods and materials</b>                  | <b>S2-S3</b>    |
| <b>Optimization studies</b>                           | <b>S4-S5</b>    |
| <b>Experimental details and characterization data</b> | <b>S6-S39</b>   |
| <b>Unsuccessful results and up-scaling experiment</b> | <b>S40</b>      |
| <b>Transformations</b>                                | <b>S41-S44</b>  |
| <b>Experimental details for mechanistic studies</b>   | <b>S45-S48</b>  |
| <b>X-Ray crystal structure of 2l and 4a</b>           | <b>S49-S53</b>  |
| <b>References</b>                                     | <b>S54</b>      |
| <b>Copies of NMR spectra</b>                          | <b>S55-S129</b> |

## General methods and materials

**Reagents** were purchased from commercial suppliers and used as received unless noted otherwise. The photocatalysts,<sup>[1]</sup> Hantzsch esters **HEH-1**<sup>[2]</sup> and **HEH-2**<sup>[3]</sup> were either commercially available or synthesized according to reported procedures.

**Reactions** were carried out in dry glassware under an argon atmosphere (Argon 5.0, Sauerstoffwerk Friedrichshafen). For this, the glassware was dried by heat gun under high vacuum (oil pump, 0.1 mbar), cooled to room temperature and backfilled with argon. An argon atmosphere in the reaction vessel was maintained throughout the reaction, unless noted otherwise. For the addition of solvents and reagents, syringes and cannula were flushed with argon three times prior to use. All yields are isolated yields, unless noted otherwise. For optimization studies in catalytic reactions, yields were determined from the <sup>1</sup>H-NMR spectrum of the crude product using 1,3,5-trimethoxybenzene as an internal standard.

**Solvents** were bought in p.a. quality and used without further purification. Dry solvents for air/moisture sensitive reactions were bought from commercial suppliers and used as received. Toluene was freshly distilled over sodium/benzophenone. Solvents were evaporated at 40°C under reduced pressure using a *Heidolph Laborota 4001* rotatory evaporator system and a rotary vane pump ( $\geq 8$  mbar) from Vaccubrand GmbH & Co. KG.

**Thin layer chromatography (TLC)** was performed on Macherey-Nagel silica gel 60 F254 aluminum plates (0.25 mm layer thickness). Compounds were visualized using UV light ( $\lambda = 254$  nm) or by applying common staining solution and heating:

KMnO<sub>4</sub> stain: KMnO<sub>4</sub> (3.00 g), Na<sub>2</sub>CO<sub>3</sub> (20.0 g), aq. NaOH solution (5 % w/v, 5.00 mL) in H<sub>2</sub>O (300 mL).  
MOPS stain: phosphomolybdic acid hydrate (25.0 g) in EtOH (250 mL).

**Flash column chromatography** was carried out using standard glass columns packed with a plug of cotton wool, sea sand (1-2 cm), silica gel 60 (Macherey-Nagel, 0.04-0.063 mm, 230-240 mesh) and sea sand (1-2 cm). Alternatively, purification was performed on an Ultra Performance Flash Purification System- *puriFlash*<sup>®</sup> XS 420+ equipped with a PF-15C18HP/35G column.

**Melting points (mp)** were determined on a Stuart<sup>®</sup> SMP10 digital melting point apparatus and are uncorrected.

**Nuclear magnetic resonance (NMR)** spectra were measured on BRUKER Avance III HD 300 MHz, BRUKER Avance Neo 400 MHz and BRUKER Avance 500 MHz spectrometers. <sup>1</sup>H-NMR spectra were

measured at 300, 400 or 500 MHz,  $^{13}\text{C}$ -NMR spectra were measured at 101 or 125 MHz,  $^{19}\text{F}$ -NMR spectra were measured at 282, 377 or 471 MHz. All signals are referenced to the signal of the deuterated solvent ( $^1\text{H}$ -NMR:  $\text{CHCl}_3$ ,  $\delta = 7.26$  ppm;  $\text{DMSO-d}_5$ ,  $\delta = 2.49$  ppm,  $\text{C}_6\text{D}_6$ ,  $\delta = 7.15$  ppm;  $^{13}\text{C}$ -NMR:  $^{13}\text{CDCl}_3$ ,  $\delta = 77.1$  ppm;  $\text{DMSO-d}_6$ ,  $\delta = 39.5$  ppm,  $\text{C}_6\text{D}_6$ ,  $\delta = 128$  ppm).  $^{13}\text{C}$ -NMR spectra are  $^1\text{H}$  broad band decoupled. Measurements on the BRUKER Avance Neo 400 MHz and BRUKER Avance 500 MHz spectrometers as well as all 2D experiments were performed in the institute's analytical department. NMR data are reported as follows: chemical shift ( $\delta/\text{ppm}$ ), multiplicity (s: singlet; d: doublet; t: triplet; q: quartet; p: pentet; m: multiplet; brs: broad signal), coupling constants ( $J/\text{Hz}$ ), integration.

**High resolution mass spectrometry (HRMS)** experiments were performed on a Thermo Fisher Scientific Exactive<sup>TM</sup> mass spectrometer (Orbitrap instrument). Samples were infused directly or via a LC/MS setup. Ionization was achieved by electrospray ionization (ESI, needle voltage 2.5-5.0 kV, ion transfer tube 250°C, sheath/auxiliary gas  $\text{N}_2$ ) or atmospheric pressure chemical ionization (APCI, corona needle current 5-10  $\mu\text{A}$ , vaporizer temperature 50-400°C, sheath gas  $\text{N}_2$ , auxiliary gas  $\text{N}_2/\text{NH}_3$ ). All experiments were performed in the institute's analytic department. HRMS data are reported as follows: ionization method (ESI or APCI in positive or negative mode), chemical formula,  $[\text{ion}]^{\text{charge}}$ , mass to charge ratio ( $m/z$ ): calculated value, found value.

**Stern-Volmer** quenching experiments were performed using a PerkinElmer LS55 Fluorescence Spectrometer.

**Reaction Setup** A reaction setup containing a 4.8 W, 3528 300 Blue LEDs strip as light source and a case fan as cooling system was used to run the catalysis,<sup>[4]</sup> see Figure 1.

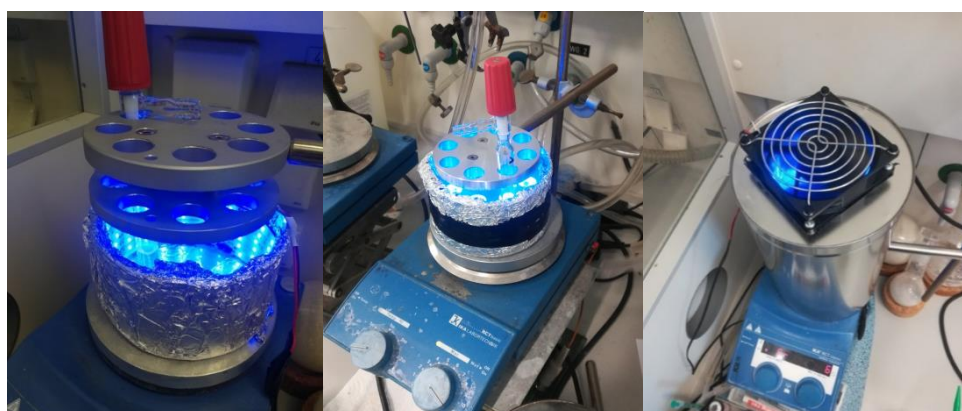

**Figure 1:** Reaction setup containing blue LED strips and a case fan.

## Optimization studies

**Table S1:** Screening of Photocatalysts in ketone-alkyne cyclization reaction

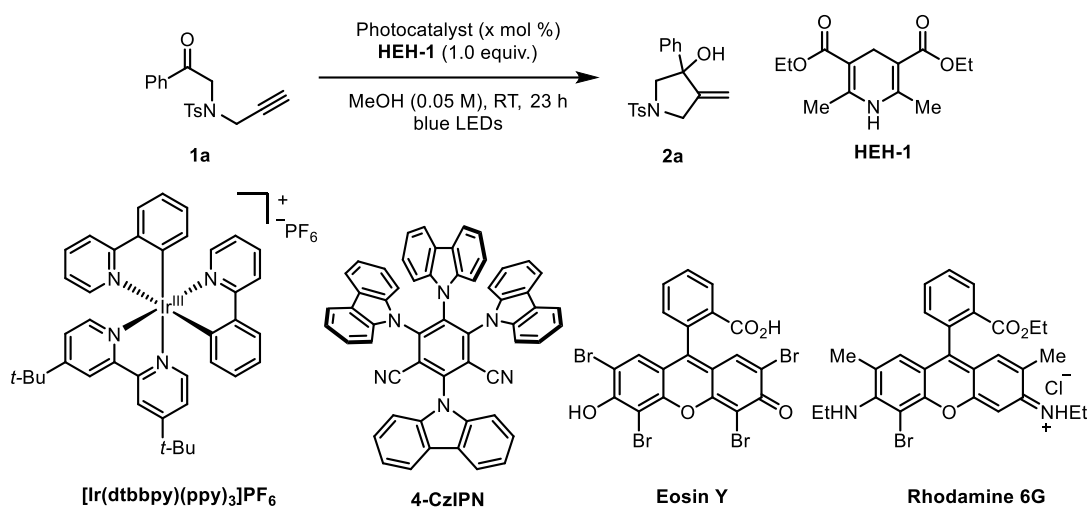

| Entry <sup>a</sup> | Photocatalyst                                                | x        | Yield [%] |
|--------------------|--------------------------------------------------------------|----------|-----------|
| 1                  | [Ir(dtbbpy)(ppy) <sub>2</sub> ] <sub>2</sub> PF <sub>6</sub> | 0.5      | 66        |
| 2                  | [Ir(ppy) <sub>3</sub> ]                                      | 0.5      | 81        |
| 3                  | 4-CzIPN                                                      | 0.5      | 55        |
| 4                  | Eosin Y                                                      | 0.5      | 24        |
| 5                  | Rhodamine 6G                                                 | 0.5      | --        |
| 6                  | 4-CzIPN                                                      | 1        | 70        |
| 7                  | <b>4-CzIPN</b>                                               | <b>2</b> | <b>73</b> |

<sup>a</sup>Reaction conditions (unless otherwise specified): **1a** (0.2 mmol), Photocatalyst (x mol %), and **HEH-1** (1.0 equiv.) in MeOH (4 mL), irradiated by blue LEDs at rt. NMR yields are reported by using 1,3,5-trimethoxybenzene as internal standard, isolated yield is presented in parenthesis.

**Table S2:** Screening of Photocatalysts in ketone-allene cyclization reaction

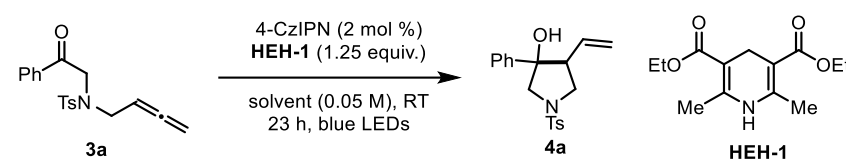

| Entry <sup>a</sup> | solvent | Yield [%] | d.r.  |
|--------------------|---------|-----------|-------|
| 1                  | MeCN    | 48        | 1.8:1 |
| 2                  | THF     | 53        | 1.7:1 |
| 3                  | EA      | 44        | 1.1:1 |
| 4                  | DCM     | 29        | 0.8:1 |

|                 |             |           |              |
|-----------------|-------------|-----------|--------------|
| 5               | MeOH        | 65        | 2.5:1        |
| 6               | DMA         | 64        | 2.5:1        |
| 7               | 1,4-Dioxane | 38        | 1.1:1        |
| 8               | toluene     | 31        | 1:1          |
| 9               | DMF         | 80        | 2.5:1        |
| 10              | DMSO        | 74        | 2.8:1        |
| 11 <sup>b</sup> | <b>DMSO</b> | <b>74</b> | <b>3.5:1</b> |

<sup>a</sup>Reaction conditions: 5-allenyl ketones **3a** (0.1 mmol), 4-CzIPN (2 mol %), and **HEH-1** (1.25 equiv.) in solvent (1 mL), irradiated by blue LEDs at rt. NMR yields are reported by using 1,3,5-trimethoxybenzene as internal standard. Diastereoselective ratio (d.r.) was determined by <sup>1</sup>H NMR spectroscopy of the crude mixture. <sup>b</sup>6 mL DMSO was used.

## Experimental details and characterization data

### General Procedure GP1 - Coupling of alkynes and $\alpha$ -haloacetophenones

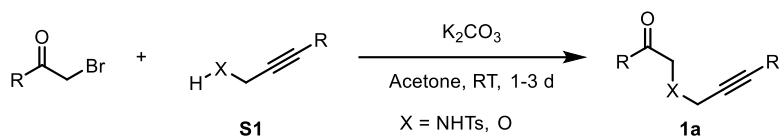

In a modified procedure,<sup>[5]</sup>  $\alpha$ -haloacetophenone, alkynes **S1** and  $\text{K}_2\text{CO}_3$  were suspended in acetone and it was stirred at rt until completion of the reaction was confirmed by TLC.  $\text{H}_2\text{O}$  was added and it was extracted with EtOAc. The combined organic layers were dried over  $\text{Na}_2\text{SO}_4$  and the solvent was removed under reduced pressure.

### General Procedure GP2 - Synthesis of propargylic tosyl amides

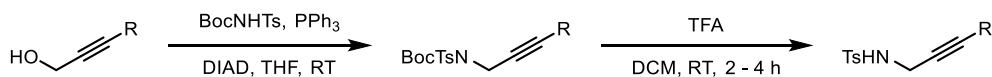

*tert*-Butyl tosyl-carbamate and  $\text{PPh}_3$  (1.5 equiv.) were dissolved in THF. After cooling to  $0^\circ\text{C}$ , propargylic alcohol (1.1 equiv.) and diisopropyl azodicarboxylate (1.1 equiv.) were added dropwise. The mixture was allowed to warm to rt and stirred overnight. The solvent was removed under reduced pressure.

Propargylic tosyl carbamate was dissolved in  $\text{CH}_2\text{Cl}_2$  and  $\text{CF}_3\text{COOH}$  (4.5 equiv.) was added dropwise. It was stirred at rt until completion of the reaction was confirmed by TLC. The solvent was evaporated under reduced pressure.

### General Procedure GP3 - Synthesis of Allenyl propargylic tosyl amides

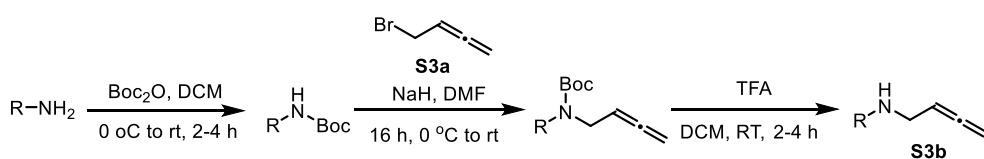

To a 1,2-dichloroethane (0.5 M) solution of amine (1.0 equiv.) were added  $\text{Boc}_2\text{O}$  (1.2 equiv.), triethylamine (1.1 equiv.), and dimethylaminopyridines (DMAP) (0.1 equiv.) at room temperature. The reaction mixture was stirred overnight and poured into water (20 mL). The organic layer was separated and the aqueous layer was extracted with DCM (3 x 20 mL). The combined organic layer was washed with 1 M HCl (50 mL), water (50 mL) and then dried over  $\text{MgSO}_4$ . The solvent was removed under reduced pressure. The residue was precipitated from *n*-hexane and filtered off to give the N-Boc-amine (quant).<sup>[6]</sup>

To a stirred suspension of NaH (60 % in oil, 1.0 equiv.) in DMF (0.5 M) at 0 °C was added N-Boc-amine (1 equiv.) as a solution in DMF (10 mL). The reaction mixture was stirred at room temperature for 30 min. **S3a**<sup>[7]</sup> (1.2 equiv.) was added dropwise at room temperature. The reaction mixture was stirred overnight and poured into H<sub>2</sub>O (50 mL) and EtOAc (20 mL). The phases were separated and the aqueous phase was extracted with EtOAc (3 x 20 mL). The combined organic layers were washed with brine (3 x 50 mL), dried over MgSO<sub>4</sub>, filtered and concentrated. The crude material was purified by flash chromatography on silica gel to afford allene.<sup>[8]</sup>

To a DCM (0.5 M) solution of allenylamine (1.0 equiv.) was added dropwise trifluoroacetic acid (20 equiv.) at room temperature. The reaction mixture was stirred overnight and evaporated under reduced pressure. The crude material was purified by flash chromatography on silica gel (*n*-pentane/EtOAc 10:1 to 5:1) to afford **S3b** as a white solid (quant).<sup>[8]</sup>

#### N-(buta-2,3-dien-1-yl)-4-methylbenzenesulfonamide

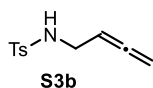

Prepared according to the general procedure **GP3**, starting from 4-methylbenzenesulfonamide (1.7 g, 10 mmol, 1.0 equiv.). This compound has been reported already.<sup>[9]</sup>

#### N-(buta-2,3-dien-1-yl)-4-methoxyaniline

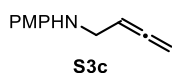

Prepared according to the general procedure **GP3**, starting from 4-methoxyaniline (1.2 g, 10 mmol, 1.0 equiv.). This compound has been reported already.<sup>[9]</sup>

#### General Procedure GP4 - Coupling of allenes and α-haloacetophenones

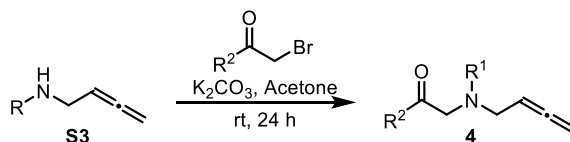

To a solution of **S3** (1.0 equiv.) in acetone (0.2 M) was added K<sub>2</sub>CO<sub>3</sub> (2.0 equiv.) followed by α-haloacetophenones (1.05 equiv.), and the mixture was stirred at room temperature for 16 h. The reaction was quenched with and the acetone was removed under reduced pressure. The resulting aqueous

phase was extracted with EtOAc, and the combined organic layers were washed with brine, dried ( $\text{Na}_2\text{SO}_4$ ), filtered, and concentrated *in vacuo*. Purification of the residue by column chromatography (*n*-pentane/EtOAc) gave allene **4**.<sup>[9]</sup>

### General Procedure GP5 - Photoredox-catalyzed ketone-alkyne coupling reaction

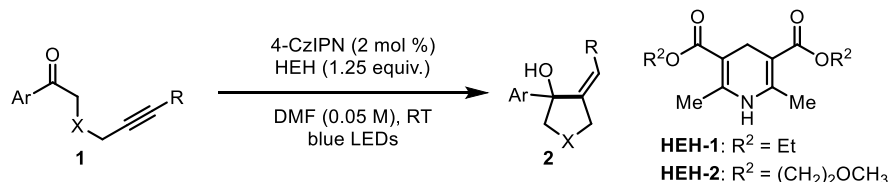

To an oven-dried Schlenk-tube equipped with magnetic stirring was charged with **1** (0.2 mmol), Hantzsch-ester **HEH** (0.25 mmol, 1.25 equiv.) and 4-CzIPN (2 mol %). The Schlenk tube was put on vacuum and backfilled with argon three times. DMF or MeOH (4 mL) was added and the reaction mixture was degassed twice before it was stirred at rt under blue LEDs light until completion of the reaction was confirmed by TLC. The solvent was evaporated under reduced pressure.

### General Procedure GP6 - Photoredox-catalyzed ketone-allene coupling reaction

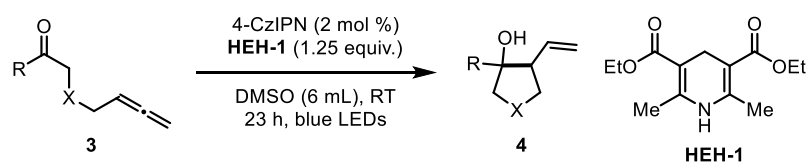

To an oven-dried Schlenk-tube equipped with magnetic stirring was charged with **3** (0.2 mmol), Hantzsch-ester **HEH-1** (63mg, 0.25 mmol, 1.25 equiv.) and 4-CzIPN (3.2 mg, 2 mol %). The Schlenk tube was put on vacuum and backfilled with argon three times. DMSO (6 mL) was added and then the mixture was stirred at room temperature under blue LEDs until completion of the reaction was confirmed by TLC. Then poured into water (40 mL), The organic layer was separated and the aqueous layer was extracted with EtOAc (3 x 15 mL). The combined organic layer was washed with brine (3 x 40 mL) and then dried over  $\text{Na}_2\text{SO}_4$ . The solvent was removed under reduced pressure. Purification of the residue by column chromatography (*n*-pentane/EtOAc) gave **4**.

### Reagent and Substrate Synthesis



5-alkynyl-ketones **1a**,<sup>[5]</sup> **1c**,<sup>[10]</sup> **1e**,<sup>[10]</sup> **1g**,<sup>[11]</sup> **1h**,<sup>[12]</sup> **1l**<sup>[10]</sup> were synthesized according to the corresponding literatures. Propargylic tosyl amides **S1a**,<sup>[13]</sup> **S1i**,<sup>[14]</sup> **S1j**,<sup>[15]</sup> **S1m**,<sup>[16]</sup> were synthesized according to reported procedure.

The others were synthesized according to the general procedure mentioned above.

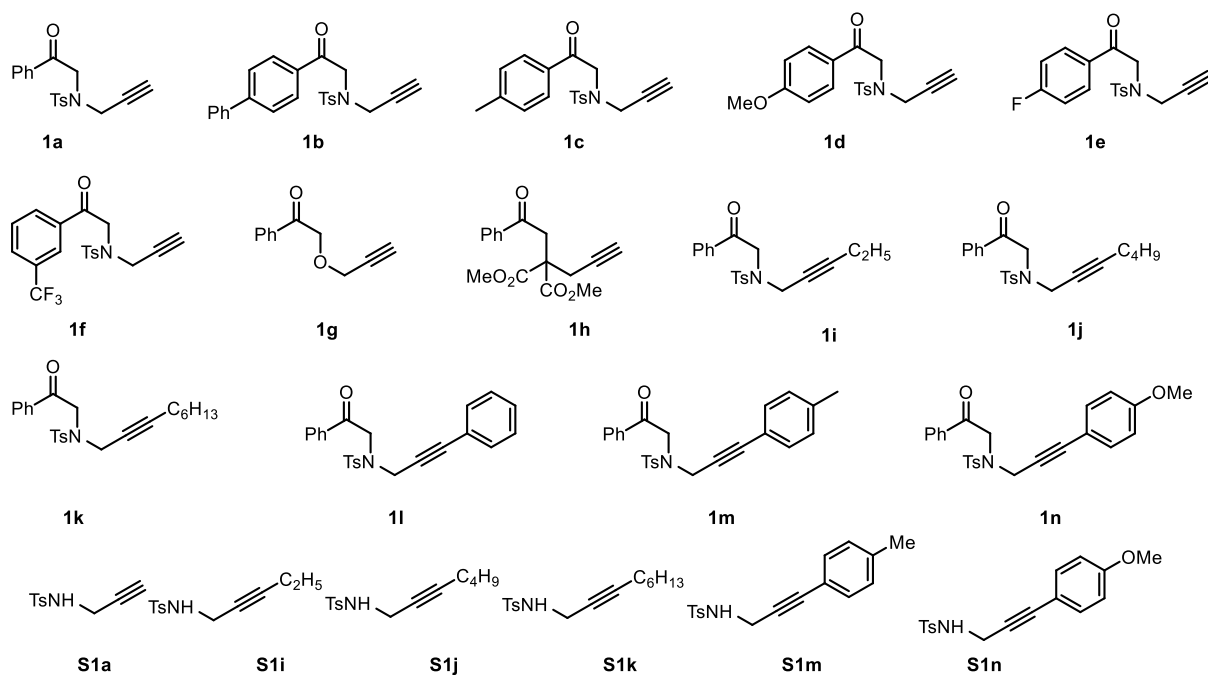

#### ***N*-(2-([1,1'-biphenyl]-4-yl)-2-oxoethyl)-4-methyl-*N*-(prop-2-yn-1-yl)benzenesulfonamide (1b)**

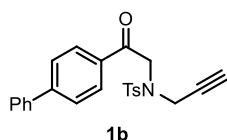

According to **GP1** from propargylic tosyl amides (**S1a**) (500 mg, 2.39 mmol), 1-([1,1'-biphenyl]-4-yl)-2-bromoethan-1-one (986 mg, 3.58 mmol, 1.5 equiv.) and  $K_2CO_3$  (495 mg, 3.58 mmol, 1.5 equiv.). After stirring in acetone (16 mL) for 2 days, it was quenched with  $H_2O$  (20 mL) and extracted with EtOAc ( $3 \times 50$  mL). Flash chromatography on silica gel (7:3 *n*-pentane/Et<sub>2</sub>O) provided the title compound as a white solid (318 mg, 33%). **R<sub>f</sub>** (1:1 *n*-pentane/Et<sub>2</sub>O) = 0.55. **m.p.** = 136°C. **<sup>1</sup>H NMR** (500 MHz, CDCl<sub>3</sub>) δ 8.01-8.05 (m, 2H), 7.76-7.80 (m, 2H), 7.68-7.73 (m, 2H), 7.61-7.65 (m, 2H), 7.46-7.51 (m, 2H), 7.40-7.45 (m, 1H), 7.31-7.35 (m, 2H), 4.84 (d, *J* = 0.6 Hz, 2H), 4.30 (dd, *J* = 2.6, 0.7 Hz, 2H), 2.44 (s, 3H), 2.13 (t, *J* = 2.5 Hz, 1H); **<sup>13</sup>C NMR** (126 MHz, CDCl<sub>3</sub>) δ 193.0, 146.7, 144.0, 139.8, 136.2, 133.6, 129.8, 129.2, 128.8, 128.6, 127.8, 127.6, 127.4, 76.7, 74.6, 51.7, 37.5, 21.7. **HR-MS**: *calcd.* for C<sub>24</sub>H<sub>21</sub>NO<sub>3</sub>S: 404.1315 [(M+H)<sup>+</sup>]; *found*: 404.1315 [(M+H)<sup>+</sup>].

### ***N*-(2-(4-methoxyphenyl)-2-oxoethyl)-4-methyl-*N*-(prop-2-yn-1-yl)benzenesulfonamide (1d)**

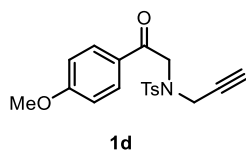

According to **GP1** from propargylic tosyl amides (**S1a**) (500 mg, 2.39 mmol), 2-bromo-1-(4-methoxyphenyl)ethan-1-one (821 mg, 3.58 mmol, 1.5 equiv.) and  $K_2CO_3$  (495 mg, 3.58 mmol, 3.58 equiv.). After stirring in acetone (16 mL) for two days, it was quenched with  $H_2O$  (20 mL) and extracted with EtOAc (3 × 50 mL). Flash chromatography on silica gel (1:1 *n*-pentane/Et<sub>2</sub>O) provided the title compound as a white-yellow solid (558 mg, 59%).  $R_f$  (1:2 *n*-pentane/Et<sub>2</sub>O) = 0.50. **m.p.** = 97°C. **<sup>1</sup>H NMR** (400 MHz, CDCl<sub>3</sub>) δ 7.90-7.97 (m, 2H), 7.74-7.79 (m, 2H), 7.28-7.33 (m, 2H), 6.92-6.97 (m, 2H), 4.74 (d,  $J$  = 0.6 Hz, 2H), 4.27 (dd,  $J$  = 2.5, 0.6 Hz, 2H), 3.87 (s, 3H), 2.43 (s, 3H), 2.10 (t,  $J$  = 2.5 Hz, 1H); **<sup>13</sup>C NMR** (101 MHz, CDCl<sub>3</sub>) δ 191.8, 164.2, 143.9, 136.3, 130.6, 129.7, 128.0, 127.8, 114.2, 76.8, 74.4, 55.7, 51.3, 37.5, 21.7. **HR-MS**: *calcd.* for C<sub>19</sub>H<sub>19</sub>NO<sub>4</sub>S: 358.1108 [(M+H)<sup>+</sup>]; *found*: 358.1107 [(M+H)<sup>+</sup>].

### ***N*-(2-oxo-2-(3-(trifluoromethyl)phenyl)ethyl)-4-methyl-*N*-(prop-2-yn-1-yl)benzenesulfonamide (1f)**

**(1f)**

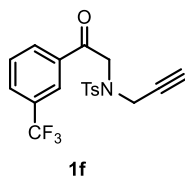

According to **GP1** from propargylic tosyl amides (**S1a**) (500 mg, 2.39 mmol), 2-bromo-1-(3-(trifluoromethyl)phenyl)ethan-1-one (829 mg, 3.11 mmol, 1.3 equiv.) and  $K_2CO_3$  (429 mg, 3.11 mmol, 1.3 equiv.). After stirring in acetone (18 mL) overnight, it was quenched with  $H_2O$  (20 mL) and extracted with EtOAc (3 × 50 mL). Flash chromatography on silica gel (4:1 to 3:2 *n*-pentane/Et<sub>2</sub>O) provided the title compound as yellow oil (821 mg, 87%).  $R_f$  (1:1 *n*-pentane/Et<sub>2</sub>O) = 0.65. **<sup>1</sup>H NMR** (500 MHz, CDCl<sub>3</sub>) δ 8.20 (dq,  $J$  = 1.7, 0.9 Hz, 1H), 8.16 (dt,  $J$  = 7.9, 1.6 Hz, 1H), 7.87 (ddt,  $J$  = 7.8, 1.6, 0.9 Hz, 1H), 7.73-7.80 (m, 2H), 7.65 (tt,  $J$  = 7.8, 0.8 Hz, 1H), 7.31-7.38 (m, 2H), 4.79 (d,  $J$  = 0.7 Hz, 2H), 4.26 (dd,  $J$  = 2.6, 0.7 Hz, 2H), 2.45 (s, 3H), 2.12-2.16 (m, 1H); **<sup>13</sup>C NMR** (126 MHz, CDCl<sub>3</sub>) δ 192.5, 144.2, 135.9, 135.5, 131.7 (q,  $J_{C-F}$  = 33.0 Hz), 131.4, 130.4 (q,  $J_{C-F}$  = 3.7 Hz), 129.9, 129.7, 127.8, 125.1 (q,  $J_{C-F}$  = 3.7 Hz),

123.7 (q,  $J_{C-F} = 272.6$  Hz), 76.5, 74.9, 51.9, 37.7, 21.7.  **$^{19}\text{F}$  NMR** (471 MHz,  $\text{CDCl}_3$ )  $\delta = -62.87$  (s). **HR-MS**: *calcd.* for  $\text{C}_{19}\text{H}_{16}\text{F}_3\text{NO}_3\text{S}$ : 418.0695 [(M+Na) $^+$ ]; *found*: 418.0697 [(M+Na) $^+$ ].

#### 4-Methyl-*N*-(non-2-yn-1-yl)benzenesulfonamide (**S1k**)

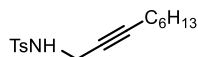

**S1k**

According to **GP2** from BocNHTs. Flash chromatography on silica gel (3:1 *n*-pentane/ $\text{Et}_2\text{O}$ ) provided the title compound as waxy oil (505 mg, 63%).  $R_f$  (1:1 *n*-pentane/ $\text{Et}_2\text{O}$ ) = 0.35.  **$^1\text{H}$  NMR** (500 MHz,  $\text{CDCl}_3$ )  $\delta$  7.74-7.79 (m, 2H), 7.29-7.33 (m, 2H), 4.46 (s, 1H), 3.80 (dt,  $J = 5.9, 2.3$  Hz, 2H), 2.43 (s, 3H), 1.95 (tt,  $J = 7.1, 2.3$  Hz, 2H), 1.16-1.36 (m, 8H), 0.88 (t,  $J = 7.1$  Hz, 3H);  **$^{13}\text{C}$  NMR** (126 MHz,  $\text{CDCl}_3$ )  $\delta$  143.6, 137.0, 129.7, 127.5, 85.8, 74.1, 33.6, 31.4, 28.6, 28.4, 22.6, 21.6, 18.6, 14.1. **HR-MS**: *calcd.* for  $\text{C}_{16}\text{H}_{23}\text{NO}_2\text{S}$ : 294.1522 [(M+H) $^+$ ]; *found*: 294.1523 [(M+H) $^+$ ].

#### 4-Methyl-*N*-(2-oxo-2-phenylethyl)-*N*-(pent-2-yn-1-yl)benzenesulfonamide (**1i**)

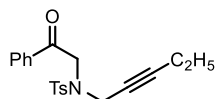

**1i**

According to **GP1** from **S1i** (750 mg, 3.16 mmol), 2-bromo-1-phenylethan-1-one (818 mg, 4.11 mmol, 1.3 equiv.) and  $\text{K}_2\text{CO}_3$  (568 mg, 4.11 mmol, 1.3 equiv.). After stirring in acetone (22 mL) for 20 h, it was quenched with  $\text{H}_2\text{O}$  (20 mL) and extracted with  $\text{EtOAc}$  (3  $\times$  50 mL). Flash chromatography on silica gel (2:1 *n*-pentane/ $\text{Et}_2\text{O}$ ) provided the title compound as a white-yellow solid (684 mg, 59%).  $R_f$  (2:1 *n*-pentane/ $\text{Et}_2\text{O}$ ) = 0.45. **m.p.** = 66°C.  **$^1\text{H}$  NMR** (400 MHz,  $\text{CDCl}_3$ )  $\delta$  7.93-7.99 (m, 2H), 7.73-7.80 (m, 2H), 7.54-7.61 (m, 1H), 7.43-7.51 (m, 2H), 7.28-7.33 (m, 2H), 4.74 (d,  $J = 0.7$  Hz, 2H), 4.21 (td,  $J = 2.3, 0.7$  Hz, 2H), 2.42 (s, 3H), 1.93 (qt,  $J = 7.5, 2.3$  Hz, 2H), 0.89 (t,  $J = 7.5$  Hz, 3H);  **$^{13}\text{C}$  NMR** (101 MHz,  $\text{CDCl}_3$ )  $\delta$  193.6, 143.7, 136.3, 135.1, 133.8, 129.6, 128.8, 128.1, 127.8, 88.4, 71.8, 51.8, 38.0, 21.6, 13.5, 12.2. **HR-MS**: *calcd.* for  $\text{C}_{20}\text{H}_{21}\text{NO}_3\text{S}$ : 356.1315 [(M+H) $^+$ ]; *found*: 356.1315 [(M+H) $^+$ ].

#### *N*-(hept-2-yn-1-yl)-4-methyl-*N*-(2-oxo-2-phenylethyl)benzenesulfonamide (**1j**)

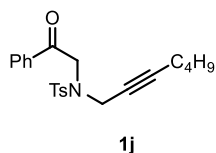

According to **GP1** from **S1j** (462 mg, 1.74 mmol), 2-bromo-1-phenylethan-1-one (465 mg, 2.33 mmol, 1.2 equiv.) and  $K_2CO_3$  (329 mg, 2.38 mmol, 1.4 equiv.). After stirring in acetone (15 mL) overnight, it was quenched with  $H_2O$  (20 mL) and extracted with EtOAc (3 × 30 mL). Flash chromatography on silica gel (4:1 *n*-pentane/Et<sub>2</sub>O) provided the title compound as a white-yellow solid (547 mg, 76%).  $R_f$  (2:1 *n*-pentane/Et<sub>2</sub>O) = 0.40. **m.p.** = 69°C. **<sup>1</sup>H NMR** (400 MHz,  $CDCl_3$ ) δ 7.94-7.99 (m, 2H), 7.74-7.79 (m, 2H), 7.56-7.63 (m, 1H), 7.45-7.52 (m, 2H), 7.29-7.33 (m, 2H), 4.75 (s, 2H), 4.22 (td,  $J$  = 2.3, 0.7 Hz, 2H), 2.44 (s, 3H), 1.94 (ddt,  $J$  = 6.9, 4.7, 2.3 Hz, 2H), 1.15-1.31 (m, 4H), 0.77-0.84 (m, 3H); **<sup>13</sup>C NMR** (101 MHz,  $CDCl_3$ ) δ 193.7, 143.7, 136.5, 135.2, 133.8, 129.7, 128.9, 128.2, 127.9, 87.3, 72.5, 51.9, 38.1, 30.5, 22.0, 21.7, 18.3, 13.6. **HR-MS**: *calcd.* for  $C_{22}H_{26}NO_3S$ : 384.1628 [(M+H)<sup>+</sup>]; *found*: 384.1633 [(M+H)<sup>+</sup>].

#### 4-Methyl-*N*-(non-2-yn-1-yl)-*N*-(2-oxo-2-phenylethyl)benzenesulfonamide (**1k**)

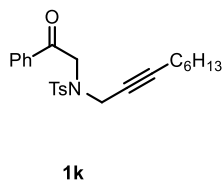

According to **GP1** from **S1k** (441 mg, 1.50 mmol), 2-bromo-1-phenylethan-1-one (421 mg, 2.12 mmol, 1.4 equiv.) and  $K_2CO_3$  (297 mg, 2.15 mmol, 1.4 equiv.). After stirring in acetone (15 mL) overnight, it was quenched with  $H_2O$  (20 mL) and extracted with EtOAc (3 × 30 mL). Flash chromatography on silica gel (4:1 *n*-pentane/Et<sub>2</sub>O) provided the title compound as yellow oil (601 mg, 86%).  $R_f$  (2:1 *n*-pentane/Et<sub>2</sub>O) = 0.50. **<sup>1</sup>H NMR** (400 MHz,  $CDCl_3$ ) δ 7.94-7.99 (m, 2H), 7.74-7.80 (m, 2H), 7.56-7.63 (m, 1H), 7.44-7.52 (m, 2H), 7.29-7.35 (m, 2H), 4.75 (s, 2H), 4.23 (td,  $J$  = 2.3, 0.7 Hz, 2H), 2.43 (s, 3H), 1.94 (tt,  $J$  = 6.9, 2.3 Hz, 2H), 1.11-1.34 (m, 8H), 0.79-0.94 (m, 3H); **<sup>13</sup>C NMR** (101 MHz,  $CDCl_3$ ) δ 193.7, 143.7, 136.5, 135.2, 133.8, 129.7, 128.9, 128.2, 127.9, 87.3, 72.5, 51.8, 38.1, 31.4, 28.6, 28.5, 22.6, 21.7, 18.7, 14.2. **HR-MS**: *calcd.* for  $C_{24}H_{29}NO_3S$ : 412.1941 [(M+H)<sup>+</sup>]; *found*: 412.1938 [(M+H)<sup>+</sup>].

#### 4-Methyl-*N*-(3-(*p*-tolyl)prop-2-yn-1-yl)benzenesulfonamide (**S1n**)

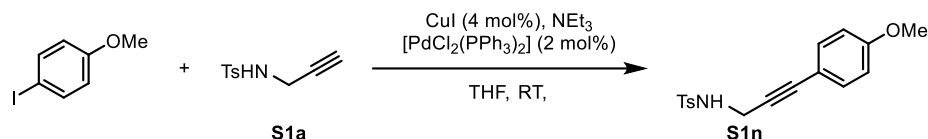

Propargyl amine **S1a** (500 mg, 2.39 mmol), 1-iodo-4-methoxybenzene (727 mg, 3.11 mmol, 1.3 equiv.), [PdCl<sub>2</sub>(PPh<sub>3</sub>)<sub>2</sub>] (33.5 mg, 47.8 μmol, 2 mol%) and CuI (18.2 mg, 95.6 μmol, 4 mol%) were suspended in THF (15 mL). NEt<sub>3</sub> (1 mL, 7.18 mmol, 3.0 equiv.) was added dropwise. After stirring at rt overnight, purification via flash chromatography on silica gel (1:1 *n*-pentane/Et<sub>2</sub>O) provided the title compound as a yellow solid (382 mg, 51%). *R<sub>f</sub>* (1:1 *n*-pentane/Et<sub>2</sub>O) = 0.40. *m.p.* = 125°C. <sup>1</sup>H NMR (400 MHz, CDCl<sub>3</sub>) δ 7.79-7.84 (m, 2H), 7.24-7.43 (m, 2H), 7.06-7.11 (m, 2H), 6.74-6.80 (m, 2H), 4.85 (t, *J* = 6.1 Hz, 1H), 4.05 (dd, *J* = 6.1, 1.3 Hz, 2H), 3.79 (d, *J* = 1.3 Hz, 3H), 2.37 (s, 3H); <sup>13</sup>C NMR (101 MHz, CDCl<sub>3</sub>) δ 160.0, 143.8, 137.1, 133.2, 129.8, 127.6, 114.3, 113.9, 84.8, 82.0, 55.4, 34.0, 21.6. **HR-MS**: *calcd.* for C<sub>17</sub>H<sub>17</sub>NO<sub>3</sub>S: 314.0856 [(M-H)<sup>-</sup>]; *found*: 314.0856 [(M-H)<sup>-</sup>].

#### 4-Methyl-*N*-(2-oxo-2-phenylethyl)-*N*-(3-(*p*-tolyl)prop-2-yn-1-yl)benzenesulfonamide (**1m**)

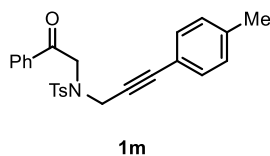

According to **GP1** from **S1m** (300 mg, 1.00 mmol), 2-bromo-1-phenylethan-1-one (199 mg, 1.00 mmol, 1.0 equiv.) and K<sub>2</sub>CO<sub>3</sub> (138 mg, 1.00 mmol, 1.0 equiv.). After stirring in acetone (10 mL) overnight, it was quenched with H<sub>2</sub>O (20 mL) and extracted with EtOAc (3 × 20 mL). Flash chromatography on silica gel (2:1 *n*-pentane/Et<sub>2</sub>O) provided the title compound as a white solid (277 mg, 66%). *R<sub>f</sub>* (1:1 *n*-pentane/Et<sub>2</sub>O) = 0.60. *m.p.* = 121°C. <sup>1</sup>H NMR (400 MHz, CDCl<sub>3</sub>) δ 7.93-8.02 (m, 2H), 7.77-7.87 (m, 2H), 7.56-7.65 (m, 1H), 7.44-7.52 (m, 2H), 7.28-7.35 (m, 2H), 6.97-7.08 (m, 4H), 4.80 (d, *J* = 0.5 Hz, 2H), 4.48 (s, 2H), 2.40 (s, 3H), 2.31 (s, 3H); <sup>13</sup>C NMR (101 MHz, CDCl<sub>3</sub>) δ 193.6, 143.8, 138.8, 136.3, 135.1, 133.9, 131.6, 129.8, 129.0, 128.9, 128.3, 127.8, 119.1, 86.5, 81.0, 52.0, 38.5, 21.6, 21.5. **HR-MS**: *calcd.* for C<sub>25</sub>H<sub>23</sub>NO<sub>3</sub>S: 440.1291 [(M+Na)<sup>+</sup>]; *found*: 440.1295 [(M+Na)<sup>+</sup>].

#### *N*-(3-(4-methoxyphenyl)prop-2-yn-1-yl)-4-methyl-*N*-(2-oxo-2-phenylethyl)benzenesulfonamide (**1n**)

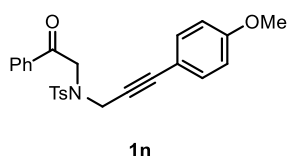

According to **GP3** from **S1n** (300 mg, 951  $\mu\text{mol}$ ), 2-bromo-1-phenyl-ethan-1-one (189 mg, 951  $\mu\text{mol}$ , 1.0 equiv.) and  $\text{K}_2\text{CO}_3$  (131 mg, 951  $\mu\text{mol}$ , 1.0 equiv.). After stirring in acetone (9 mL) overnight, it was quenched with  $\text{H}_2\text{O}$  (20 mL) and extracted with EtOAc ( $3 \times 20$  mL). Flash chromatography on silica gel (1:1 to 1:2 *n*-pentane/Et<sub>2</sub>O) provided the title compound as a white solid (226 mg, 55%).  $R_f$  (1:1 *n*-pentane/Et<sub>2</sub>O) = 0.40. **m.p.** = 146°C. **<sup>1</sup>H NMR** (500 MHz,  $\text{CDCl}_3$ )  $\delta$  7.95-8.00 (m, 2H), 7.79-7.83 (m, 2H), 7.56-7.63 (m, 1H), 7.44-7.51 (m, 2H), 7.29-7.33 (m, 2H), 7.02-7.08 (m, 2H), 6.73-6.77 (m, 2H), 4.80 (s, 2H), 4.47 (s, 2H), 3.78 (s, 3H), 2.40 (s, 3H); **<sup>13</sup>C NMR** (126 MHz,  $\text{CDCl}_3$ )  $\delta$  193.6, 159.9, 143.9, 136.3, 135.1, 133.9, 133.2, 129.8, 128.9, 128.3, 127.9, 114.2, 113.9, 86.3, 80.3, 55.4, 52.0, 38.5, 21.7. **HR-MS**: *calcd.* for  $\text{C}_{25}\text{H}_{23}\text{NO}_4\text{S}$ : 456.1240 [(M+Na)<sup>+</sup>]; *found*: 456.1245 [(M+Na)<sup>+</sup>].

**5-allenyl-ketones 3o, 3p** were synthesized according to the corresponding literatures. **Allenyl tosyl amides S3a-3c** were synthesized according to reported procedure.

The others were synthesized according to the general procedure mentioned above.

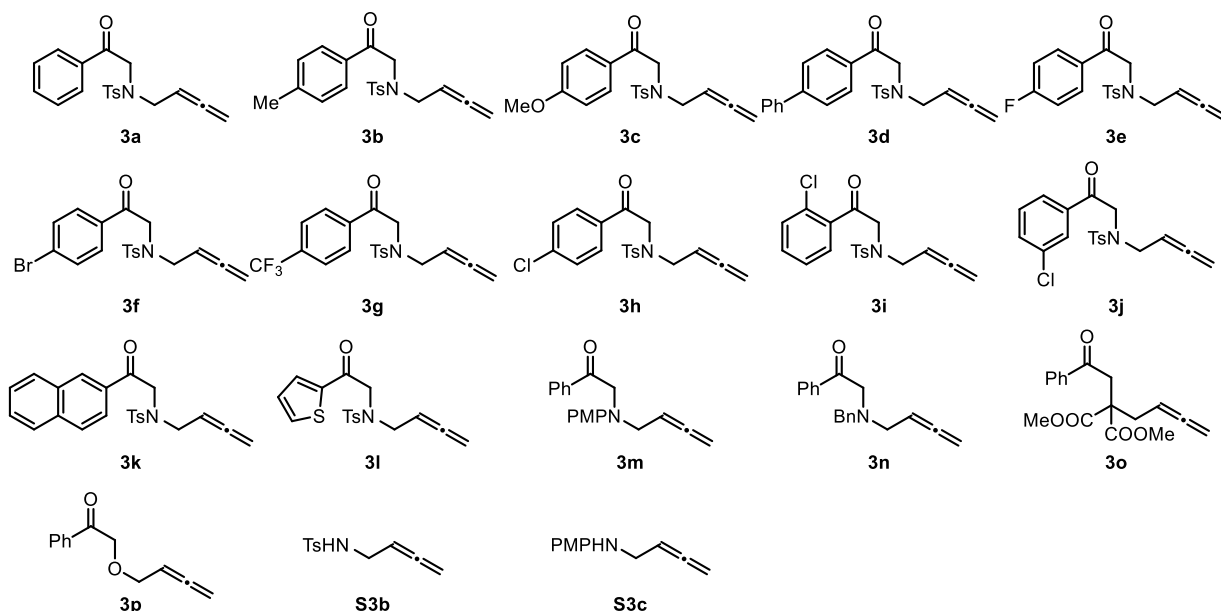

**N-(buta-2,3-dien-1-yl)-4-methyl-N-(2-oxo-2-phenylethyl)benzenesulfonamide (3a)**

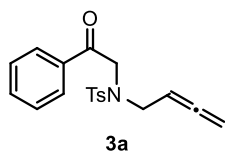

Prepared according to the general procedure **GP4**, starting from 2-Bromoacetophenone (1.04 g, 5.25 mmol, 1.05 equiv.) and **S3b** (1.12 g, 5.0 mmol, 1.0 equiv.). Flash chromatography on silica gel (*n*-pentane/EtOAc 10:1 to 5:1) provided the title compound as white solid (1.1 g, 68%).  $R_f$  (5:1 *n*-pentane/EtOAc) = 0.4. This compound has been reported already.<sup>[9]</sup>

#### **N-(buta-2,3-dien-1-yl)-4-methyl-N-(2-oxo-2-(p-tolyl)ethyl)benzenesulfonamide (3b)**

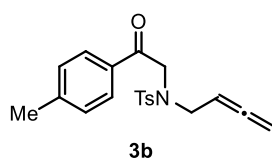

Prepared according to the general procedure **GP4**, starting from 2-Bromo-4'-methylacetophenone (1.12 g, 5.25 mmol, 1.05 equiv.) and **S3b** (1.12 g, 5.0 mmol, 1.0 equiv.). Flash chromatography on silica gel (*n*-pentane/EtOAc 10:1 to 5:1) provided the title compound as white solid (1.4 g, 80%).  $R_f$  (5:1 *n*-pentane/EtOAc) = 0.4. **m.p.** = 56 °C. **<sup>1</sup>H NMR** (400 MHz, CDCl<sub>3</sub>) δ 7.85-7.80 (m, 2H), 7.78-7.73 (m, 2H), 7.32-7.23 (m, 4H), 5.03-4.94 (m, 1H), 4.74 (s, 2H), 4.61 (dt, *J* = 6.4, 2.4 Hz, 2H), 3.93 (dt, *J* = 7.2, 2.4 Hz, 2H), 2.41 (s, 3H), 2.40 (s, 3H); **<sup>13</sup>C NMR** (101 MHz, CDCl<sub>3</sub>) δ 209.8, 193.4, 144.6, 143.4, 137.1, 132.7, 129.6, 129.5, 128.1, 127.5, 85.7, 76.2, 51.9, 47.2, 21.7, 21.5. **HR-MS** (+ *p* ESI) *m/z*: [M+Na]<sup>+</sup> Calcd for C<sub>20</sub>H<sub>21</sub>NNaO<sub>3</sub>S<sup>+</sup>: 378.1134; *found*: 378.1140.

#### **N-(buta-2,3-dien-1-yl)-N-(2-(4-methoxyphenyl)-2-oxoethyl)-4-methylbenzenesulfonamide**

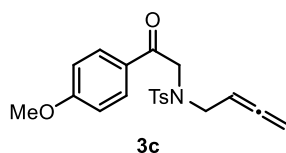

Prepared according to the general procedure **GP4**, starting from 2-Bromo-4'-methoxyacetophenone (1.20 g, 5.25 mmol, 1.05 equiv.) and **S3b** (1.12 g, 5.0 mmol, 1.0 equiv.). Flash chromatography on silica gel (*n*-pentane/EtOAc 10:1 to 5:1) provided the title compound as white solid (1.3 g, 72%).  $R_f$  (4:1 *n*-pentane/EtOAc) = 0.4. **m.p.** = 68 °C. **<sup>1</sup>H NMR** (400 MHz, CDCl<sub>3</sub>) δ 7.94-7.89 (m, 2H), 7.77-7.73 (m, 2H), 7.31-7.26 (m, 2H), 6.95-6.90 (m, 2H), 5.02-4.93 (m, 1H), 4.70 (s, 2H), 4.61 (dt, *J* = 6.4, 2.4 Hz, 2H), 3.92 (dt, *J* = 7.2, 2.4 Hz, 2H), 3.85 (s, 3H), 2.41 (s, 3H); **<sup>13</sup>C NMR** (101 MHz, CDCl<sub>3</sub>) δ 209.8, 192.2, 164.0,

143.4, 137.1, 130.3, 129.6, 128.2, 127.5, 114.0, 85.7, 76.2, 55.5, 51.7, 47.3, 21.5. **HR-MS** (+ p ESI)  $m/z$ :  $[M+Na]^+$  Calcd for  $C_{20}H_{21}NNaO_4S^+$ : 394.1083; *found*: 394.1085.

#### **N-(2-([1,1'-biphenyl]-4-yl)-2-oxoethyl)-N-(buta-2,3-dien-1-yl)-4-methylbenzenesulfonamide**

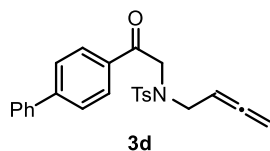

Prepared according to the general procedure **GP4**, starting from 2-Bromo-4'-phenylacetophenone (0.58 g, 2.1 mmol, 1.05 equiv.) and **S3b** (0.45 g, 2.0 mmol, 1.0 equiv.). Flash chromatography on silica gel (*n*-pentane/EtOAc 10:1 to 5:1) provided the title compound as white solid (0.76 g, 91%).  $R_f$  (4:1 *n*-pentane/EtOAc) = 0.4. **m.p.** = 85 °C. **<sup>1</sup>H NMR** (400 MHz,  $CDCl_3$ )  $\delta$  8.04-8.00 (m, 2H), 7.81-7.77 (m, 2H), 7.72-7.68 (m, 2H), 7.65-7.60 (m, 2H), 7.51-7.45 (m, 2H), 7.44-7.38 (m, 1H), 7.34-7.29 (m, 2H), 5.06-4.98 (m, 1H), 4.80 (s, 2H), 4.65 (dt,  $J$  = 6.8, 2.4 Hz, 2H), 3.97 (dt,  $J$  = 7.6, 2.4 Hz, 2H), 2.43 (s, 3H); **<sup>13</sup>C NMR** (101 MHz,  $CDCl_3$ )  $\delta$  209.8, 193.5, 146.4, 143.5, 139.6, 137.0, 133.8, 129.6, 129.0, 128.6, 128.4, 127.5, 127.4, 127.3, 85.7, 76.3, 52.1, 47.3, 21.5. **HR-MS** (+ p ESI)  $m/z$ :  $[M+Na]^+$  Calcd for  $C_{25}H_{23}NNaO_3S^+$ : 440.1291; *found*: 440.1299.

#### **N-(buta-2,3-dien-1-yl)-N-(2-(4-fluorophenyl)-2-oxoethyl)-4-methylbenzenesulfonamide**

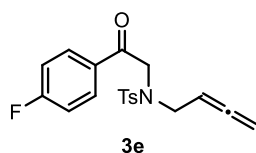

Prepared according to the general procedure **GP4**, starting from 2-Bromo-4'-fluoroacetophenone (0.91 g, 4.2 mmol, 1.05 equiv.) and **S3b** (0.89 g, 4.0 mmol, 1.0 equiv.). Flash chromatography on silica gel (*n*-pentane/EtOAc 10:1 to 5:1) provided the title compound as white solid (1.2 g, 84%).  $R_f$  (4:1 *n*-pentane/EtOAc) = 0.4. **m.p.** = 63 °C. **<sup>1</sup>H NMR** (500 MHz,  $CDCl_3$ )  $\delta$  8.00-7.94 (m, 2H), 7.76-7.72 (m, 2H), 7.32-7.27 (m, 2H), 7.16-7.09 (m, 2H), 4.98-4.91 (m, 1H), 4.69 (s, 2H), 4.63-4.59 (m, 2H), 4.24 (dt,  $J$  = 7.0, 2.5 Hz, 2H), 2.41 (s, 3H); **<sup>13</sup>C NMR** (126 MHz,  $CDCl_3$ )  $\delta$  209.8, 192.4, 166.0 (d,  $J_{C-F}$  = 256.5 Hz), 143.6, 136.7, 131.5 (d,  $J_{C-F}$  = 3.2 Hz), 130.8 (d,  $J_{C-F}$  = 9.7 Hz), 129.7, 127.4, 116.0 (d,  $J_{C-F}$  = 21.8 Hz), 85.5, 76.3, 52.1, 47.3, 21.5; **<sup>19</sup>F NMR** (471 MHz,  $CDCl_3$ )  $\delta$  -103.7 (m). **HR-MS** (+ p ESI)  $m/z$ :  $[M+Na]^+$  Calcd for  $C_{19}H_{18}FNNaO_3S^+$ : 382.0884; *found*: 382.0886.



### N-(2-(4-bromophenyl)-2-oxoethyl)-N-(buta-2,3-dien-1-yl)-4-methylbenzenesulfonamide

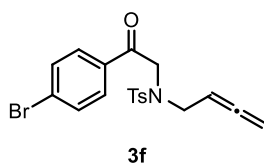

Prepared according to the general procedure **GP4**, starting from 2,4'-Dibromoacetophenone (0.58 g, 2.1 mmol, 1.05 equiv.) and **S3b** (0.45 g, 2.0 mmol, 1.0 equiv.). Flash chromatography on silica gel (*n*-pentane/EtOAc 10:1 to 5:1) provided the title compound as white solid (0.66 g, 78%).  $R_f$  (4:1 *n*-pentane/EtOAc) = 0.4. **m.p.** = 84 °C.  $^1\text{H NMR}$  (400 MHz,  $\text{CDCl}_3$ )  $\delta$  7.82-7.78 (m, 2H), 7.76-7.71 (m, 2H), 7.63-7.58 (m, 2H), 7.33-7.27 (m, 2H), 4.99-4.90 (m, 1H), 4.67 (s, 2H), 4.62 (dt,  $J = 6.4, 2.4$  Hz, 2H), 3.90 (dt,  $J = 7.2, 2.4$  Hz, 2H), 2.41 (s, 3H);  $^{13}\text{C NMR}$  (101 MHz,  $\text{CDCl}_3$ )  $\delta$  209.8, 193.2, 143.6, 136.8, 133.9, 132.2, 129.7, 129.6, 128.9, 127.5, 85.5, 76.3, 52.2, 47.4, 21.6. **HR-MS** (+ p ESI)  $m/z$ :  $[\text{M}+\text{Na}]^+$  Calcd for  $\text{C}_{19}\text{H}_{18}\text{BrNNaO}_3\text{S}^+$ : 442.0083; *found*: 442.0081.

### N-(buta-2,3-dien-1-yl)-4-methyl-N-(2-oxo-2-(4-(trifluoromethyl)phenyl)ethyl)benzenesulfonamide

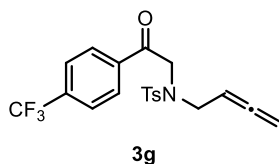

Prepared according to the general procedure **GP4**, starting from 2-Bromo-4'-(trifluoromethyl)acetophenone (0.56 g, 2.1 mmol, 1.05 equiv.) and **S3b** (0.45 g, 2.0 mmol, 1.0 equiv.). Flash chromatography on silica gel (*n*-pentane/EtOAc 10:1 to 5:1) provided the title compound as white solid (0.47 g, 57%).  $R_f$  (4:1 *n*-pentane/EtOAc) = 0.4. **m.p.** = 66 °C.  $^1\text{H NMR}$  (400 MHz,  $\text{CDCl}_3$ )  $\delta$  8.07-8.03 (m, 2H), 7.76-7.71 (m, 4H), 7.33-7.28 (m, 2H), 4.99-4.90 (m, 1H), 4.72 (s, 2H), 4.63 (dt,  $J = 6.8, 2.4$  Hz, 2H), 3.90 (dt,  $J = 7.2, 2.4$  Hz, 2H), 2.42 (s, 3H);  $^{13}\text{C NMR}$  (101 MHz,  $\text{CDCl}_3$ )  $\delta$  209.9, 193.5, 143.8, 137.9, 136.6, 134.9 (q,  $J_{\text{C-F}} = 32.9$  Hz), 129.8, 128.5, 127.5, 125.9 (q,  $J_{\text{C-F}} = 3.8$  Hz), 123.5 (q,  $J_{\text{C-F}} = 273.8$  Hz), 85.5, 76.4, 52.6, 47.6, 21.5;  $^{19}\text{F NMR}$  (471 MHz,  $\text{CDCl}_3$ )  $\delta$  -63.2 (s). **HR-MS** (+ p ESI)  $m/z$ :  $[\text{M}+\text{Na}]^+$  Calcd for  $\text{C}_{20}\text{H}_{18}\text{F}_3\text{NNaO}_3\text{S}^+$ : 432.0852; *found*: 432.0860.

### N-(buta-2,3-dien-1-yl)-N-(2-(4-chlorophenyl)-2-oxoethyl)-4-methylbenzenesulfonamide

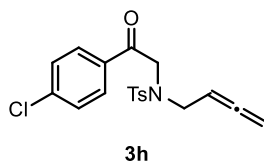

Prepared according to the general procedure **GP4**, starting from 2-Bromo-4'-chloroacetophenone (0.98 g, 4.2 mmol, 1.05 equiv.) and **S3b** (0.89 g, 4.0 mmol, 1.0 equiv.). Flash chromatography on silica gel (*n*-pentane/EtOAc 10:1 to 5:1) provided the title compound as white solid (1.2 g, 73%).  $R_f$  (4:1 *n*-pentane/EtOAc) = 0.4. **m.p.** = 85 °C. **<sup>1</sup>H NMR** (400 MHz, CDCl<sub>3</sub>) δ 7.90-7.85 (m, 2H), 7.76-7.71 (m, 2H), 7.45-7.41 (m, 2H), 7.32-7.27 (m, 2H), 4.99-4.90 (m, 1H), 4.68 (s, 2H), 4.62 (dt, *J* = 6.4, 2.4 Hz, 2H), 3.90 (dt, *J* = 7.2, 2.4 Hz, 2H), 2.41 (s, 3H); **<sup>13</sup>C NMR** (101 MHz, CDCl<sub>3</sub>) δ 209.8, 192.9, 143.6, 140.2, 136.8, 133.5, 129.7, 129.5, 129.1, 127.5, 85.5, 76.3, 52.2, 47.4, 21.5. **HR-MS** (+ p ESI) *m/z*: [M+Na]<sup>+</sup> Calcd for C<sub>19</sub>H<sub>18</sub>ClNNaO<sub>3</sub>S<sup>+</sup>: 398.0588; *found*: 398.0592.

**N-(buta-2,3-dien-1-yl)-N-(2-(2-chlorophenyl)-2-oxoethyl)-4-methylbenzenesulfonamide**

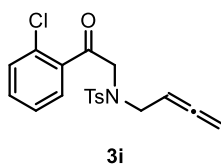

Prepared according to the general procedure **GP4**, starting from 2-Bromo-2'-chloroacetophenone (0.74 g, 3.15 mmol, 1.05 equiv.) and **S3b** (0.67 g, 3.0 mmol, 1.0 equiv.). Flash chromatography on silica gel (*n*-pentane/EtOAc 10:1 to 5:1) provided the title compound as white solid (0.62 g, 55%).  $R_f$  (4:1 *n*-pentane/EtOAc) = 0.4. **m.p.** = 136 °C. **<sup>1</sup>H NMR** (400 MHz, CDCl<sub>3</sub>) δ 7.89 (ddd, *J* = 2.0, 1.6, 0.4 Hz, 1H), 7.83 (ddd, *J* = 7.6, 1.6, 1.2 Hz, 1H), 7.77-7.73 (m, 2H), 7.57 (ddd, *J* = 8.0, 2.0, 1.2 Hz, 1H), 7.46-7.40 (m, 1H), 7.34-7.29 (m, 2H), 5.02-4.94 (m, 1H), 4.70 (s, 2H), 4.65 (dt, *J* = 6.4, 2.4 Hz, 2H), 3.92 (dt, *J* = 7.2, 2.4 Hz, 2H), 2.44 (s, 3H); **<sup>13</sup>C NMR** (101 MHz, CDCl<sub>3</sub>) δ 210.0, 193.0, 143.7, 136.9, 136.7, 135.3, 133.7, 130.3, 129.8, 128.2, 127.6, 126.2, 85.7, 76.4, 52.3, 47.5, 21.6. **HR-MS** (+ p APCI) *m/z*: [M+H]<sup>+</sup> Calcd for C<sub>19</sub>H<sub>19</sub>ClNO<sub>3</sub>S<sup>+</sup>: 376.0769; *found*: 376.0778.

**N-(buta-2,3-dien-1-yl)-N-(2-(3-chlorophenyl)-2-oxoethyl)-4-methylbenzenesulfonamide**

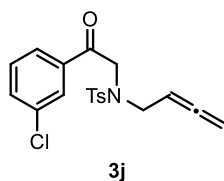

Prepared according to the general procedure **GP4**, starting from 2-Bromo-3'-chloroacetophenone (0.74 g, 3.15 mmol, 1.05 equiv.) and **S3b** (0.67 g, 5.0 mmol, 1.0 equiv.). Flash chromatography on silica gel (*n*-pentane/EtOAc 10:1 to 5:1) provided the title compound as white solid (0.76 mg, 67%). **R<sub>f</sub>** (4:1 *n*-pentane/EtOAc) = 0.4. **m.p.** = 68 °C. **<sup>1</sup>H NMR** (400 MHz, CDCl<sub>3</sub>) δ 7.78-7.73 (m, 2H), 7.50 (ddd, *J* = 8.0, 1.2, 0.8 Hz, 1H), 7.44-7.41 (m, 2H), 7.38-7.32 (m, 1H), 7.32-7.28 (m, 2H), 5.03-4.94 (m, 1H), 4.71-4.66 (m, 4H), 3.95 (dt, *J* = 7.2, 2.4 Hz, 2H), 2.43 (s, 3H); **<sup>13</sup>C NMR** (101 MHz, CDCl<sub>3</sub>) δ 210.0, 197.3, 143.6, 137.1, 137.1, 132.4, 131.2, 130.6, 129.73, 129.5, 127.6, 127.2, 85.8, 76.5, 54.9, 47.5, 21.6. **HR-MS** (+ p APCI) *m/z*: [M+H]<sup>+</sup> Calcd for C<sub>19</sub>H<sub>19</sub>ClNO<sub>3</sub>S<sup>+</sup>: 376.0769; *found*: 376.0776.

#### **N-(buta-2,3-dien-1-yl)-4-methyl-N-(2-(naphthalen-2-yl)-2-oxoethyl)benzenesulfonamide**

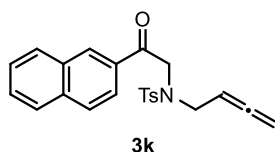

Prepared according to the general procedure **GP4**, starting from 2-Bromo-2'-acetoneaphthone (1.04 g, 4.2 mmol, 1.05 equiv.) and **S3b** (1.12 g, 5.0 mmol, 1.0 equiv.). Flash chromatography on silica gel (*n*-pentane/EtOAc 10:1 to 5:1) provided the title compound as white solid (1 g, 64%). **R<sub>f</sub>** (4:1 *n*-pentane/EtOAc) = 0.4. **m.p.** = 90 °C. **<sup>1</sup>H NMR** (400 MHz, CDCl<sub>3</sub>) δ 8.48 (d, *J* = 1.6 Hz, 1H), 7.98-7.94 (m, 2H), 7.90-7.84 (m, 2H), 7.82-7.78 (m, 2H), 7.64-7.53 (m, 2H), 7.33-7.28 (m, 2H), 5.07-4.99 (m, 1H), 4.91 (s, 2H), 4.63 (dt, *J* = 6.4, 2.4 Hz, 2H), 4.00 (dt, *J* = 7.2, 2.4 Hz, 2H), 2.42 (s, 3H); **<sup>13</sup>C NMR** (101 MHz, CDCl<sub>3</sub>) δ 209.8, 193.8, 143.5, 137.0, 135.8, 132.4, 129.8, 129.6, 128.8, 128.7, 127.8, 127.5, 127.0, 123.5, 85.7, 76.3, 52.1, 47.3, 21.5. **HR-MS** (+ p ESI) *m/z*: [M+Na]<sup>+</sup> Calcd for C<sub>23</sub>H<sub>21</sub>NNaO<sub>3</sub>S<sup>+</sup>: 414.1134; *found*: 414.1141.

#### **N-(buta-2,3-dien-1-yl)-4-methyl-N-(2-oxo-2-(thiophen-2-yl)ethyl)benzenesulfonamide**

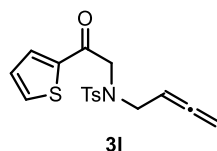

Prepared according to the general procedure **GP4**, starting from 2-(2-Bromoacetyl)thiophene (1.0 g, 4.2 mmol, 1.05 equiv.) and **S3b** (1.12 g, 5.0 mmol, 1.0 equiv.). Flash chromatography on silica gel (*n*-pentane/EtOAc 10:1 to 5:1) provided the title compound as white solid (572.5 mg, 41%).  $R_f$  (4:1 *n*-pentane/EtOAc) = 0.4. **m.p.** = 58 °C.  $^1\text{H NMR}$  (400 MHz,  $\text{CDCl}_3$ )  $\delta$  7.85 (dd,  $J$  = 4.0, 1.2 Hz, 1H), 7.77-7.73 (m, 2H), 7.67 (dd,  $J$  = 5.2, 1.2 Hz, 1H), 7.32-7.27 (m, 2H), 7.15 (dd,  $J$  = 4.8, 3.6 Hz, 1H), 5.03-4.94 (m, 1H), 4.6-4.61 (m, 4H), 3.92 (dt,  $J$  = 7.6, 2.4 Hz, 2H), 2.42 (s, 3H).  $^{13}\text{C NMR}$  (101 MHz,  $\text{CDCl}_3$ )  $\delta$  209.9, 187.0, 143.6, 141.4, 136.8, 134.3, 132.6, 129.7, 128.4, 127.6, 85.5, 76.3, 52.3, 47.5, 21.6. **HR-MS** (+ p APCI)  $m/z$ :  $[\text{M}+\text{H}]^+$  Calcd for  $\text{C}_{17}\text{H}_{18}\text{NO}_3\text{S}_2^+$ : 348.0723; *found*: 348.0726.

### 2-(buta-2,3-dien-1-yl(4-methoxyphenyl)amino)-1-phenylethan-1-one

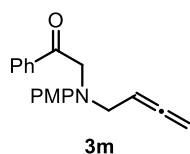

Prepared according to the general procedure **GP4**, starting from 2-Bromoacetophenone (853 mg, 4.2 mmol, 1.05 equiv.) and **S3c** (0.88 g, 5.0 mmol, 1.0 equiv.). Flash chromatography on silica gel (pentane/EtOAc 10:1 to 5:1) provided the title compound as white solid (751 mg, 64%).  $R_f$  (4:1 *n*-pentane/EtOAc) = 0.4. **m.p.** = 65 °C.  $^1\text{H NMR}$  (400 MHz,  $\text{CDCl}_3$ )  $\delta$  8.03-7.99 (m, 2H), 7.63-7.57 (m, 1H), 7.52-7.46 (m, 2H), 6.83-6.78 (m, 2H), 6.71-6.65 (m, 2H), 5.28-5.20 (m, 1H), 4.75 (dt,  $J$  = 6.8, 2.8 Hz, 2H), 4.71 (s, 2H), 4.03 (dt,  $J$  = 6.8, 2.8 Hz, 2H), 3.74 (s, 3H);  $^{13}\text{C NMR}$  (101 MHz,  $\text{CDCl}_3$ )  $\delta$  209.2, 196.9, 152.4, 143.0, 135.7, 133.5, 128.8, 128.0, 115.2, 114.8, 87.2, 76.0, 57.6, 55.8, 51.5. **HR-MS** (+ p APCI)  $m/z$ :  $[\text{M}+\text{Na}]^+$  Calcd for  $\text{C}_{19}\text{H}_{20}\text{NO}_2^+$ : 294.1489; *found*: 294.1491.

### 2-(benzyl(buta-2,3-dien-1-yl)amino)-1-phenylethan-1-one

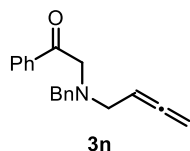

Prepared according to the general procedure **GP4**, starting from 2-Bromoacetophenone (564 mg, 2.83 mmol, 1.05 equiv.) and **S3d** (0.8 g, 5.0 mmol, 1.0 equiv.). Flash chromatography on silica gel (*n*-pentane/EtOAc 10:1 to 5:1) provided the title compound as white solid (634 mg, 84%).  $R_f$  (4:1 *n*-pentane/EtOAc) = 0.4.  $^1\text{H NMR}$  (400 MHz,  $\text{CDCl}_3$ )  $\delta$  7.92-7.90 (m, 1H), 7.90-7.88 (m, 1H), 7.54-7.48 (m, 1H),

7.42-7.36 (m, 2H), 7.32-7.18 (m, 5H), 5.21-5.13 (m, 1H), 4.66 (dt,  $J = 6.4, 2.4$  Hz, 2H), 3.89 (s, 2H), 3.7 (s, 2H), 3.28 (dt,  $J = 7.2, 2.4$  Hz, 2H), 3.74 (s, 3H);  $^{13}\text{C NMR}$  (101 MHz,  $\text{CDCl}_3$ )  $\delta$  209.9, 198.4, 138.5, 136.4, 133.1, 129.3, 128.5, 128.4, 127.3, 86.6, 75.0, 59.4, 58.2, 53.1. **HR-MS** (+ p ESI)  $m/z$ :  $[\text{M}+\text{Na}]^+$  Calcd for  $\text{C}_{19}\text{H}_{20}\text{NO}^+$ : 278.1539; *found*: 278.1547.

### dimethyl 2-(buta-2,3-dien-1-yl)-2-(2-oxo-2-phenylethyl)malonate

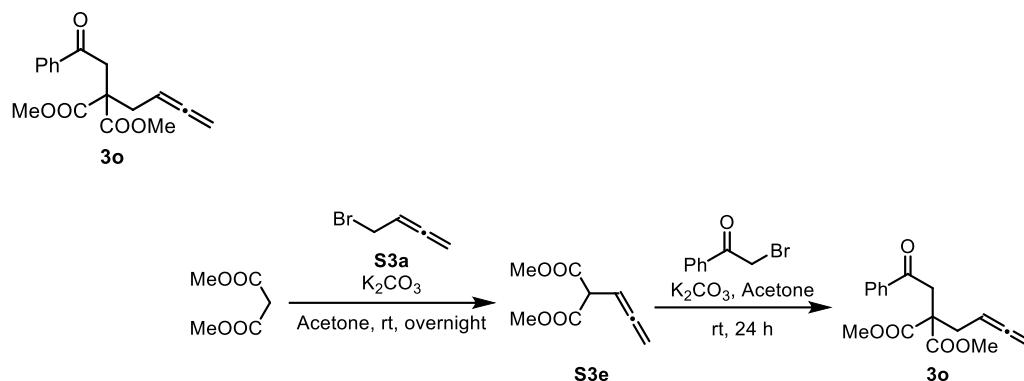

To a solution of dimethyl malonate (2.97 g, 22.5 mmol, 1.5 equiv.) in acetone (0.5 M) was added  $\text{K}_2\text{CO}_3$  (6.2 g, 45 mmol, 3.0 equiv.) followed by **S3a** (15 mmol, 1.0 equiv.), and the mixture was stirred at room temperature overnight. The reaction was quenched with  $\text{H}_2\text{O}$  (20 mL) and the acetone was removed under reduced pressure. The resulting aqueous phase was extracted with EtOAc (3 x 10 mL), and the combined organic layers were washed with brine, dried ( $\text{Na}_2\text{SO}_4$ ), filtered, and concentrated *in vacuo*. Purification of the residue by column chromatography (*n*-pentane/EtOAc 15:1 to 10:1) gave *allene* **S3e** as colorless oil (0.64 g, 21%).

To a solution of sodium hydride (128 mg, 3.2 mmol, 60% in mineral oil) in DMF (10 mL) was added a solution of **S3e** (0.64 g, 3.2 mmol) in DMF (5 mL) at 0 °C. The reaction mixture was stirred at room temperature for 30 min, a solution of 2-bromoacetophenone (796 mg, 4 mmol) in DMF (5 mL) was added. After stirring at room temperature overnight, the reaction was quenched with saturated aqueous ammonium chloride solution and extracted with ethyl acetate. The combined organic layers were washed with water, brine, dried over anhydrous  $\text{Na}_2\text{SO}_4$ , and concentrated under reduced pressure. The residue was purified by flash column chromatography (*n*-hexane/EtOAc 10:1 to 5:1) gave **3o** as colorless oil (742 mg, 76%).<sup>[17]</sup>

$^1\text{H NMR}$  (400 MHz,  $\text{CDCl}_3$ )  $\delta$  7.98-7.93 (m, 2H), 7.59-7.53 (m, 1H), 7.48-7.42 (m, 2H), 5.01-4.92 (m, 1H), 4.49 (dt,  $J = 6.4, 2.4$  Hz, 2H), 3.74 (s, 6H), 2.82 (dt,  $J = 8.0, 2.4$  Hz, 2H);  $^{13}\text{C NMR}$  (101 MHz,  $\text{CDCl}_3$ )

$\delta$  210.1, 196.7, 170.8, 136.6, 133.4, 128.7, 128.1, 84.7, 74.7, 55.7, 52.8, 41.3, 32.8. **HR-MS** (+ p APCI)

$m/z$ :  $[M+H]^+$  Calcd for  $C_{17}H_{19}O_5^+$ : 303.1227; *found*: 303.1227.

### 2-(buta-2,3-dien-1-yloxy)-1-phenylethan-1-one

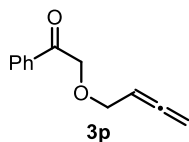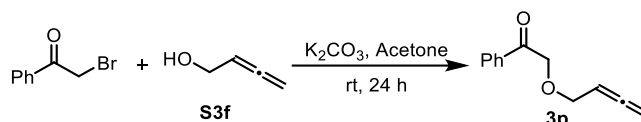

To a solution of **S3f**<sup>[7]</sup> (20 mmol, 1.0 equiv.) in acetone (0.5 M) was added  $K_2CO_3$  (6.2 g, 45 mmol, 3.0 equiv.) followed by 2-Bromoacetophenone (3.98 g, 20 mmol, 1.0 equiv.), and the mixture was stirred at room temperature overnight. The reaction was quenched with  $H_2O$  (20 mL) and the acetone was removed under reduced pressure. The resulting aqueous phase was extracted with EtOAc (3 x 10 mL), and the combined organic layers were washed with brine, dried ( $Na_2SO_4$ ), filtered, and concentrated *in vacuo*. Purification of the residue by column chromatography (*n*-pentane/EtOAc 25:1 to 20 :1) gave *allene* **S3p** as colorless oil (0.95 g, 25%).<sup>[18]</sup>

**<sup>1</sup>H NMR** (400 MHz,  $CDCl_3$ )  $\delta$  7.94-7.90 (m, 2H), 7.59-7.53 (m, 1H), 7.48-7.42 (m, 2H), 5.31-5.23 (m, 1H), 4.81-4.76 (m, 2H), 4.76-4.74 (m, 2H), 4.20-4.16 (m, 2H); **<sup>13</sup>C NMR** (101 MHz,  $CDCl_3$ )  $\delta$  209.7, 196.2, 135.1, 133.5, 128.7, 127.9, 87.2, 75.9, 72.3, 69.3. **HR-MS** (+ p APCI)  $m/z$ :  $[M+H]^+$  Calcd for  $C_{12}H_{13}O_2^+$ : 189.0910; *found*: 189.0912.

### Catalysis

#### 4-Methylene-3-phenyl-1-tosylpyrrolidin-3-ol (2a)

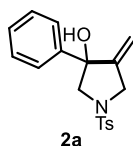

According to **GP5** from **1a** (65.4 mg, 200  $\mu$ mol) with 4-CzIPN (3.4 mg, 4.25  $\mu$ mol, 2.1 mol%) and **HEH-1** (63.6 mg, 251  $\mu$ mol, 1.25 equiv.) in DMF (4 mL) within 23 h. Flash chromatography on silica gel (3:1:1 *n*-pentane/Et<sub>2</sub>O/ $CH_2Cl_2$ ) provided the title compound as yellow oil (52.1 mg, 79%).  $R_f$  (3:1:1 *n*-

pentane/Et<sub>2</sub>O/CH<sub>2</sub>Cl<sub>2</sub>) = 0.30. **<sup>1</sup>H NMR** (500 MHz, CDCl<sub>3</sub>) δ 7.68-7.73 (m, 2H), 7.37-7.41 (m, 2H), 7.25-7.35 (m, 5H), 5.15 (t, *J* = 2.1 Hz, 1H), 4.98 (t, *J* = 2.4 Hz, 1H), 4.20 (dt, *J* = 14.2, 2.3 Hz, 1H), 3.97 (dt, *J* = 14.2, 2.3 Hz, 1H), 3.57 (d, *J* = 2.2 Hz, 2H), 2.44 (s, 3H), 2.40 (brs, 1H); **<sup>13</sup>C NMR** (126 MHz, CDCl<sub>3</sub>) δ 150.8, 144.0, 141.1, 133.0, 129.9, 128.4, 128.0, 127.9, 126.1, 110.9, 80.6, 62.3, 51.7, 21.7. **HR-MS**: *calcd.* for C<sub>18</sub>H<sub>19</sub>NO<sub>3</sub>S: 330.1158 [(M+H)<sup>+</sup>]; *found*: 330.1158 [(M+H)<sup>+</sup>].

### 3-([1,1'-Biphenyl]-4-yl)-4-methylene-1-tosylpyrrolidin-3-ol (**2b**)

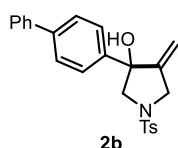

According to **GP5** from **1b** (80.7 mg, 200 μmol) with 4-CzIPN (3.2 mg, 4.0 μmol, 2.0 mol%) and **HEH-1** (63.4 mg, 250 μmol, 1.25 equiv.) in DMF (4 mL) within 14 h. Flash chromatography on silica gel (2:1 *c*-hexane/Et<sub>2</sub>O) provided the title compound as yellow oil (72.9 mg, 90%). **R<sub>f</sub>** (1:1 *c*-hexane/Et<sub>2</sub>O) = 0.30. **<sup>1</sup>H NMR** (400 MHz, CDCl<sub>3</sub>) δ 7.70-7.75 (m, 2H), 7.51-7.60 (m, 4H), 7.41-7.49 (m, 4H), 7.30-7.39 (m, 3H), 5.17-5.20 (m, 1H), 5.06 (td, *J* = 2.5, 0.5 Hz, 1H), 4.23 (dt, *J* = 14.2, 2.2 Hz, 1H), 4.01 (dt, *J* = 14.3, 2.3 Hz, 1H), 3.62 (d, *J* = 1.0 Hz, 2H), 2.42 (s, 3H), 2.39 (brs, 1H); **<sup>13</sup>C NMR** (101 MHz, CDCl<sub>3</sub>) δ 150.8, 144.0, 140.9, 140.6, 140.2, 133.2, 129.9, 129.0, 128.0, 127.6, 127.2, 127.1, 126.6, 111.0, 80.6, 62.3, 51.7, 21.7. **HR-MS**: *calcd.* for C<sub>24</sub>H<sub>24</sub>NO<sub>3</sub>S: 406.1471 [(M+H)<sup>+</sup>]; *found*: 406.1476 [(M+H)<sup>+</sup>].

### 4-Methylene-3-(*p*-tolyl)-1-tosylpyrrolidin-3-ol (**2c**)

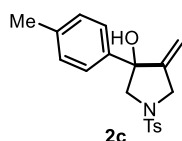

According to **GP5** from **1c** (68.6 mg, 201 μmol) with 4-CzIPN (3.3 mg, 4.1 μmol, 2.1 mol%) and **HEH-1** (63.9 mg, 252 μmol, 1.26 equiv.) in DMF (4 mL) within 2 days. Flash chromatography on silica gel (3:1:1 *n*-pentane/Et<sub>2</sub>O/CH<sub>2</sub>Cl<sub>2</sub>) provided the title compound as yellow oil (63.5 mg, 92%). **R<sub>f</sub>** (1:1 *n*-pentane/Et<sub>2</sub>O) = 0.45. **<sup>1</sup>H NMR** (400 MHz, CDCl<sub>3</sub>) δ 7.68-7.73 (m, 2H), 7.26-7.34 (m, 4H), 7.09-7.15 (m, 2H), 5.14 (t, *J* = 2.1 Hz, 1H), 5.00 (t, *J* = 2.4 Hz, 1H), 4.19 (dt, *J* = 14.2, 2.2 Hz, 1H), 3.97 (dt, *J* = 14.2, 2.3 Hz, 1H), 3.56 (s, 2H), 2.44 (s, 3H), 2.33 (s, 3H); **<sup>13</sup>C NMR** (101 MHz, CDCl<sub>3</sub>) δ 151.0, 143.9, 138.1,

137.8, 133.2, 129.9, 129.1, 128.0, 126.1, 110.7, 80.6, 62.3, 51.7, 21.7, 21.2. **HR-MS:** *calcd.* for  $C_{19}H_{21}NO_3S$ : 344.1315 [(M+H)<sup>+</sup>]; *found*: 344.1315 [(M+H)<sup>+</sup>].

### 3-(4-Methoxyphenyl)-4-methylene-1-tosylpyrrolidin-3-ol (**2d**)

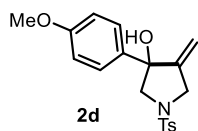

According to **GP5** from **1d** (71.1 mg, 199  $\mu$ mol) with 4-CzIPN (3.4 mg, 4.3  $\mu$ mol, 2.1 mol%) and **HEH-1** (63.8 mg, 252  $\mu$ mol, 1.26 equiv.) in DMF (4 mL) within 2 days. Flash chromatography on silica gel (3:1:1 *n*-pentane/Et<sub>2</sub>O/CH<sub>2</sub>Cl<sub>2</sub>) provided the title compound as yellow oil (54.4 mg, 76%). **R<sub>f</sub>** (1:2 *n*-pentane/Et<sub>2</sub>O) = 0.65. **<sup>1</sup>H NMR** (400 MHz, CDCl<sub>3</sub>)  $\delta$  7.67-7.72 (m, 2H), 7.29-7.33 (m, 4H), 6.81-6.86 (m, 2H), 5.14 (t, *J* = 2.1 Hz, 1H), 5.01 (t, *J* = 2.4 Hz, 1H), 4.18 (dt, *J* = 14.2, 2.2 Hz, 1H), 3.96 (dt, *J* = 14.2, 2.3 Hz, 1H), 3.80 (s, 3H), 3.55 (d, *J* = 3.4 Hz, 2H), 2.44 (s, 3H), 2.22 (brs, 1H); **<sup>13</sup>C NMR** (101 MHz, CDCl<sub>3</sub>)  $\delta$  159.4, 150.9, 143.9, 133.2, 133.1, 129.9, 128.0, 127.4, 113.8, 110.6, 80.4, 62.1, 55.4, 51.6, 21.7. **HR-MS:** *calcd.* for  $C_{19}H_{21}NO_4S$ : 382.1084 [(M+Na)<sup>+</sup>]; *found*: 382.1083 [(M+Na)<sup>+</sup>].

### 3-(4-Fluorophenyl)-4-methylene-1-tosylpyrrolidin-3-ol (**2e**)

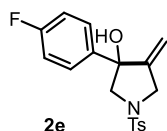

According to **GP5** from **1e** (69.0 mg, 200  $\mu$ mol) with 4-CzIPN (3.2 mg, 4.0  $\mu$ mol, 2.0 mol%) and **HEH-1** (63.3 mg, 250  $\mu$ mol, 1.25 equiv.) in DMF (4 mL) within 13 h. The solvent was evaporated, and the residue was resolved in MeOH (2 mL) and H<sub>2</sub>O (1 mL). KOH (112 mg, 2.00 mmol, 10 equiv.) was added and it was stirred overnight. The mixture was extracted with EtOAc (3  $\times$  20 mL) and the combined organic layers were dried over Na<sub>2</sub>SO<sub>4</sub>. The solvent was removed under reduced pressure. Flash chromatography on silica gel (2:3 *n*-pentane/Et<sub>2</sub>O) provided the title compound as yellow oil (52.1 mg, 75%). **R<sub>f</sub>** (2:3 *n*-pentane/Et<sub>2</sub>O) = 0.35. **<sup>1</sup>H NMR** (400 MHz, CDCl<sub>3</sub>)  $\delta$  7.67-7.73 (m, 2H), 7.29-7.40 (m, 4H), 6.94-7.02 (m, 2H), 5.16 (td, *J* = 2.1, 0.5 Hz, 1H), 4.99 (td, *J* = 2.5, 0.5 Hz, 1H), 4.15-4.24 (m, 1H), 3.96 (dt, *J* = 14.3, 2.3 Hz, 1H), 3.47-3.62 (m, 2H), 2.44 (s, 3H), 2.34 (brs, 1H); **<sup>13</sup>C NMR** (101 MHz, CDCl<sub>3</sub>)  $\delta$  162.5 (d, *J*<sub>C-F</sub> = 247.5 Hz), 150.8, 144.1, 136.91 (d, *J*<sub>C-F</sub> = 3.0 Hz), 133.1, 129.9, 128.1, 128.0,



115.2 (d,  $J_{C-F} = 22.0$  Hz), 111.0, 80.3, 62.4, 51.6, 21.7.  **$^{19}\text{F}$  NMR** (471 MHz,  $\text{CDCl}_3$ )  $\delta$  -114.57 (m). **HR-MS**: *calcd.* for  $\text{C}_{18}\text{H}_{18}\text{FNO}_3\text{S}$ : 348.1064 [(M+H) $^+$ ]; *found*: 348.1066 [(M+H) $^+$ ].

#### 4-Methylene-1-tosyl-3-(3-(trifluoromethyl)phenyl)pyrrolidin-3-ol (2f)

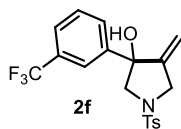

According to **GP4** from **1f** (79.3 mg, 201  $\mu\text{mol}$ ) with 4-CzIPN (3.2 mg, 4.0  $\mu\text{mol}$ , 2.0 mol%) and **HEH-1** (63.4 mg, 250  $\mu\text{mol}$ , 1.25 equiv.) in DMF (4 mL) within 13 h. The solvent was evaporated, and the residue was resolved in MeOH (2 mL) and  $\text{H}_2\text{O}$  (1 mL). KOH (112 mg, 2.00 mmol, 10 equiv.) was added and it was stirred overnight. The mixture was extracted with EtOAc (3  $\times$  20 mL) and the combined organic layers were dried over  $\text{Na}_2\text{SO}_4$ . The solvent was removed under reduced pressure. Flash chromatography on silica gel (2:3 *n*-pentane/ $\text{Et}_2\text{O}$ ) provided the title compound as yellow oil (56.7 mg, 71%).  $R_f$  (2:3 *n*-pentane/ $\text{Et}_2\text{O}$ ) = 0.40.  **$^1\text{H}$  NMR** (400 MHz,  $\text{CDCl}_3$ )  $\delta$  7.69-7.74 (m, 3H), 7.56 (dddd,  $J = 10.4, 7.8, 2.0, 1.3, 0.7$  Hz, 2H), 7.43 (tt,  $J = 7.8, 0.7$  Hz, 1H), 7.31-7.36 (m, 2H), 5.20 (td,  $J = 2.1, 0.6$  Hz, 1H), 4.97 (td,  $J = 2.5, 0.7$  Hz, 1H), 4.25 (dt,  $J = 14.3, 2.3$  Hz, 1H), 3.99 (dt,  $J = 14.4, 2.3$  Hz, 1H), 3.62 (d,  $J = 10.7$  Hz, 1H), 3.50 (d,  $J = 10.7$  Hz, 1H), 2.48 (brs, 1H), 2.44 (s, 3H);  **$^{13}\text{C}$  NMR** (101 MHz,  $\text{CDCl}_3$ )  $\delta$  150.7, 144.3, 142.4, 133.0, 130.8 (q,  $J = 32.2$  Hz), 130.0, 129.7, 128.9, 128.0, 124.8 (q,  $J = 3.7$  Hz), 124.1 (q,  $J = 272.4$  Hz), 123.1 (q,  $J = 3.9$  Hz), 111.7, 80.4, 62.6, 51.7, 21.7.  **$^{19}\text{F}$  NMR** (471 MHz,  $\text{CDCl}_3$ )  $\delta = -62.6$  (s). **HR-MS**: *calcd.* for  $\text{C}_{19}\text{H}_{18}\text{F}_3\text{NO}_3\text{S}$ : 398.1032 [(M+H) $^+$ ]; *found*: 398.1034 [(M+H) $^+$ ].

#### 4-Methylene-3-phenyltetrahydrofuran-3-ol (2g)

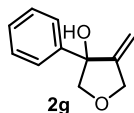

According to **GP5** from **1g** (34.5 mg, 198  $\mu\text{mol}$ ) with 4-CzIPN (3.1 mg, 3.9  $\mu\text{mol}$ , 2.0 mol%) and **HEH-1** (63.6 mg, 251  $\mu\text{mol}$ , 1.27 equiv.) in DMF (4 mL) within 20 h. Flash chromatography on silica gel (5:1 *n*-pentane/ $\text{Et}_2\text{O}$ ) provided the title compound as colourless oil (17.8 mg, 51%).  $R_f$  (1:2 *n*-pentane/ $\text{Et}_2\text{O}$ ) = 0.65.  **$^1\text{H}$  NMR** (400 MHz,  $\text{CDCl}_3$ )  $\delta$  7.50-7.55 (m, 2H), 7.34-7.40 (m, 2H), 7.27-7.32 (m, 1H), 5.17 (t,  $J = 2.2$  Hz, 1H), 4.99-5.06 (m, 1H), 4.77 (dddd,  $J = 13.7, 2.6, 2.2, 0.7$  Hz, 1H), 4.54 (dddd,  $J = 13.7, 2.7, 2.3, 0.8$  Hz, 1H), 4.03-4.10 (m, 1H), 3.96 (dd,  $J = 9.6, 0.7$  Hz, 1H);  **$^{13}\text{C}$  NMR** (101 MHz,

CDCl<sub>3</sub>)  $\delta$  155.4, 141.4, 128.3, 127.6, 126.2, 108.2, 82.2, 81.6, 71.8. **HR-MS:** *calcd.* for C<sub>11</sub>H<sub>12</sub>O<sub>4</sub>: 194.1176 [(M+NH<sub>4</sub>)<sup>+</sup>]; *found:* 194.1179 [(M+NH<sub>4</sub>)<sup>+</sup>].

### Dimethyl 3-hydroxy-4-methylene-3-phenylcyclopentane-1,1-dicarboxylate (2h)

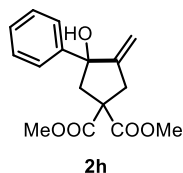

According to **GP5** from **1h** (58.2 mg, 202  $\mu$ mol) with 4-CzIPN (3.3 mg, 4.1  $\mu$ mol, 2.0 mol%) and **HEH-1** (63.3 mg, 250  $\mu$ mol, 1.24 equiv.) in DMF (4 mL) for 3 days. Flash chromatography on silica gel (5:1 to 4:1 *n*-pentane/Et<sub>2</sub>O) provided the title compound as colourless oil (28.3 mg, 49%). **R<sub>f</sub>** (1:1 *n*-pentane/Et<sub>2</sub>O) = 0.50. **<sup>1</sup>H NMR** (500 MHz, CDCl<sub>3</sub>)  $\delta$  7.45-7.48 (m, 2H), 7.31-7.36 (m, 2H), 7.23-7.28 (m, 1H), 5.17 (ddd, *J* = 2.4, 1.8, 0.5 Hz, 1H), 4.87 (dd, *J* = 2.9, 2.0 Hz, 1H), 3.80 (s, 3H), 3.72 (s, 3H), 3.50 (dq, *J* = 17.1, 1.9 Hz, 1H), 3.08 (dt, *J* = 17.1, 2.6 Hz, 1H), 2.81-2.88 (m, 1H), 2.70 (d, *J* = 14.3 Hz, 1H), 2.53 (brs, 1H); **<sup>13</sup>C NMR** (126 MHz, CDCl<sub>3</sub>)  $\delta$  173.2, 171.9, 155.6, 144.3, 128.1, 127.3, 126.1, 111.7, 82.4, 57.9, 53.3, 53.1, 51.0, 40.6. **HR-MS:** *calcd.* for C<sub>16</sub>H<sub>18</sub>O<sub>5</sub>: 273.112. [(M-(OH<sup>-</sup>))<sup>+</sup>]; *found:* 273.1128 [(M-(OH<sup>-</sup>))<sup>+</sup>].

### (Z)-3-Phenyl-4-propylidene-1-tosylpyrrolidin-3-ol (2i)

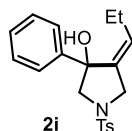

According to **GP5** from **1i** (71.0 mg, 200  $\mu$ mol) with 4-CzIPN (3.2 mg, 4.0  $\mu$ mol, 2.0 mol%) and **HEH-2** (78.3 mg, 250  $\mu$ mol, 1.25 equiv.) in MeOH (4 mL) within 14 h. The isomers could be separated by flash chromatography on silica gel (4:1:1 to 3:1:1 *n*-pentane/Et<sub>2</sub>O/CH<sub>2</sub>Cl<sub>2</sub>). The title compound was obtained as colourless oil (60.9 mg, 85% for both isomers, *Z/E* = 11:1). **R<sub>f</sub>** (4:1:1 *n*-pentane/Et<sub>2</sub>O/CH<sub>2</sub>Cl<sub>2</sub>) = 0.30 (*Z*-isomer); 0.20 (*E*-isomer). **<sup>1</sup>H NMR** (400 MHz, CDCl<sub>3</sub>)  $\delta$  7.66-7.71 (m, 2H), 7.21-7.41 (m, 7H), 5.50 (tt, *J* = 7.7, 2.0 Hz, 1H), 4.13-4.19 (m, 1H), 3.74 (ddt, *J* = 13.1, 2.0 Hz, 1H), 3.61 (d, *J* = 10.4 Hz, 1H), 3.12 (dd, *J* = 10.4, 0.5 Hz, 1H), 2.49 (brs, 1H), 2.44 (s, 3H), 1.55-1.87 (m, 2H), 0.69 (t, *J* = 7.5 Hz, 3H); **<sup>13</sup>C NMR** (101 MHz, CDCl<sub>3</sub>)  $\delta$  144.1, 142.9, 140.1, 132.1, 130.7, 129.8, 128.3, 128.3, 127.4, 125.4, 80.2,

65.7, 53.9, 21.8, 21.6, 13.3. **HR-MS:** *calcd.* for C<sub>20</sub>H<sub>23</sub>NO<sub>3</sub>S: 358.1471 [(M+H)<sup>+</sup>]; *found:* 358.1471 [(M+H)<sup>+</sup>].

#### (Z)-4-Pentylidene-3-phenyl-1-tosylpyrrolidin-3-ol (2j)

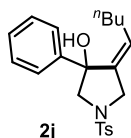

According to **GP5** from **1j** (77.2 mg, 201  $\mu$ mol) with 4-CzIPN (3.3 mg, 4.1  $\mu$ mol, 2.0 mol%) and **HEH-2** (78.6 mg, 251  $\mu$ mol, 1.25 equiv.) in MeOH (4 mL) within 14 h. The isomers could be separated by flash chromatography on silica gel (5:1:1 *n*-pentane/Et<sub>2</sub>O/CH<sub>2</sub>Cl<sub>2</sub>). The title compound was obtained as colourless oil (62.0 mg, 80% for both isomers, *Z/E* = 11:1). **R<sub>f</sub>** (4:1:1 *n*-pentane/Et<sub>2</sub>O/CH<sub>2</sub>Cl<sub>2</sub>) = 0.40 (*Z*-isomer); 0.30 (*E*-isomer). **<sup>1</sup>H NMR** (400 MHz, CDCl<sub>3</sub>)  $\delta$  7.66-7.71 (m, 2H), 7.19-7.41 (m, 7H), 5.51 (tt, *J* = 7.7, 2.0 Hz, 1H), 4.12-4.21 (m, 1H), 3.74 (dq, *J* = 13.1, 2.0, 0.5 Hz, 1H), 3.61 (dd, *J* = 10.4, 0.8 Hz, 1H), 3.12 (dd, *J* = 10.4, 0.5 Hz, 1H), 2.52 (brs, 1H), 2.44 (s, 3H), 1.56-1.81 (m, 2H), 0.93-1.16 (m, 4H), 0.62-0.70 (m, 3H); **<sup>13</sup>C NMR** (101 MHz, CDCl<sub>3</sub>)  $\delta$  144.1, 143.0, 140.6, 131.9, 129.9, 129.3, 128.3, 128.3, 127.4, 125.4, 80.1, 65.8, 54.0, 31.0, 28.0, 22.3, 21.7, 13.8. **HR-MS:** *calcd.* for C<sub>22</sub>H<sub>27</sub>NO<sub>3</sub>S: 386.1784 [(M+H)<sup>+</sup>]; *found:* 386.1789 [(M+H)<sup>+</sup>].

#### (Z)-4-Heptylidene-3-phenyl-1-tosylpyrrolidin-3-ol (2k)

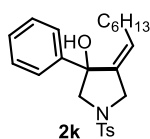

According to **GP5** from **1k** (83.3 mg, 202  $\mu$ mol) with 4-CzIPN (3.2 mg, 4.0  $\mu$ mol, 2.0 mol%) and **HEH-2** (78.4 mg, 250  $\mu$ mol, 1.24 equiv.) in MeOH (4 mL) within 14 h. The isomers could be separated by flash chromatography on silica gel (5:1:1 *n*-pentane/Et<sub>2</sub>O/CH<sub>2</sub>Cl<sub>2</sub>). The title compound was obtained as colourless oil (63.5 mg, 76% for both isomers, *Z/E* = 9:1). **R<sub>f</sub>** (4:1:1 *n*-pentane/Et<sub>2</sub>O/CH<sub>2</sub>Cl<sub>2</sub>) = 0.40 (*Z*-isomer); 0.30 (*E*-isomer). **<sup>1</sup>H NMR** (400 MHz, CDCl<sub>3</sub>)  $\delta$  7.67-7.71 (m, 2H), 7.19-7.41 (m, 7H), 5.51 (tt, *J* = 7.4, 2.0 Hz, 1H), 4.16 (ddt, *J* = 13.2, 1.5, 0.7 Hz, 1H), 3.75 (dq, *J* = 13.1, 2.1 Hz, 1H), 3.56-3.65 (m, 1H), 3.14 (d, *J* = 10.4 Hz, 1H), 2.51 (brs, 1H), 2.44 (s, 3H), 1.53-1.84 (m, 2H), 0.92-1.20 (m, 8H), 0.79 (t, *J* = 7.2 Hz, 3H); **<sup>13</sup>C NMR** (101 MHz, CDCl<sub>3</sub>)  $\delta$  144.1, 143.1, 140.6, 132.1, 129.9, 129.3, 128.3, 128.3,

127.4, 125.4, 80.2, 65.8, 54.0, 31.6, 28.9, 28.8, 28.3, 22.6, 21.7, 14.1. **HR-MS:** *calcd.* for C<sub>24</sub>H<sub>31</sub>NO<sub>3</sub>S: 414.2097 [(M+H)<sup>+</sup>]; *found:* 414.2098 [(M+H)<sup>+</sup>].

#### (Z)-4-Benzylidene-3-phenyl-1-tosylpyrrolidin-3-ol (2l)

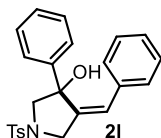

According to **GP5** from **1l** (80.5 mg, 200 μmol) with 4-CzIPN (3.4 mg, 4.3 μmol, 2.1 mol%) and **HEH-2** (78.1 mg, 249 μmol, 1.25 equiv.) in MeOH (4 mL) within 14 h. The isomers could be separated by flash chromatography on silica gel (5:1:1 *n*-pentane/Et<sub>2</sub>O/CH<sub>2</sub>Cl<sub>2</sub>). The title compound was obtained as white-yellow solid (74.2 mg, 92% for both isomers, *Z/E* = 14:1). *R<sub>f</sub>* (3:1:1 *n*-pentane/Et<sub>2</sub>O/CH<sub>2</sub>Cl<sub>2</sub>) = 0.55 (*Z*-isomer); 0.40 (*E*-isomer). *m.p.* = 180°C (decomposition). **<sup>1</sup>H NMR** (400 MHz, CDCl<sub>3</sub>) δ 7.66-7.72 (m, 2H), 7.28-7.35 (m, 4H), 7.12-7.22 (m, 3H), 6.99-7.05 (m, 5H), 6.60 (t, *J* = 2.1 Hz, 1H), 4.25-4.38 (m, 1H), 4.10 (ddd, *J* = 14.0, 2.3, 0.6 Hz, 1H), 3.49-3.66 (m, 1H), 3.31 (dd, *J* = 10.1, 0.5 Hz, 1H), 2.79 (brs, 1H), 2.44 (s, 3H); **<sup>13</sup>C NMR** (101 MHz, CDCl<sub>3</sub>) δ 144.2, 142.2, 141.2, 134.6, 132.3, 129.9, 129.1, 128.3, 128.2, 128.0, 127.6, 127.6, 126.9, 125.7, 80.5, 65.4, 54.9, 21.7. **HR-MS:** *calcd.* for C<sub>24</sub>H<sub>23</sub>NO<sub>3</sub>S: 406.1471 [(M+H)<sup>+</sup>]; *found:* 406.1472 [(M+H)<sup>+</sup>].

#### (Z)-4-(4-Methylbenzylidene)-3-phenyl-1-tosylpyrrolidin-3-ol (2m)

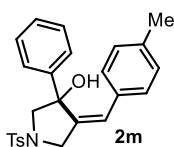

According to **GP5** from **1m** (83.0 mg, 199 μmol) with 4-CzIPN (3.2 mg, 4.0 μmol, 2.0 mol%) and **HEH-2** (78.4 mg, 250 μmol, 1.25 equiv.) in MeOH (4 mL) within 14 h. The isomers could be separated by flash chromatography on silica gel (5:1:1 *n*-pentane/Et<sub>2</sub>O/CH<sub>2</sub>Cl<sub>2</sub>). The title compound was obtained as yellow oil (77.6 mg, 93% for both isomers, *Z/E* = 12:1). *R<sub>f</sub>* (3:1:1 *n*-pentane/Et<sub>2</sub>O/CH<sub>2</sub>Cl<sub>2</sub>) = 0.60 (*Z*-isomer); 0.50 (*E*-isomer). **<sup>1</sup>H NMR** (400 MHz, CDCl<sub>3</sub>) δ 7.65-7.72 (m, 2H), 7.29-7.38 (m, 4H), 7.13-7.24 (m, 3H), 6.90 (d, *J* = 8.2 Hz, 2H), 6.81-6.88 (m, 2H), 6.52-6.62 (m, 1H), 4.27 (dd, *J* = 14.0, 2.0 Hz, 1H), 4.12 (dd, *J* = 14.1, 2.3 Hz, 1H), 3.55 (d, *J* = 10.0 Hz, 1H), 3.34 (dd, *J* = 9.9, 0.5 Hz, 1H), 2.77 (brs, 1H), 2.44 (s, 3H), 2.18 (s, 3H); **<sup>13</sup>C NMR** (101 MHz, CDCl<sub>3</sub>) δ 144.1, 142.6, 140.2, 137.5, 132.2, 131.6,

129.8, 129.0, 128.8, 128.4, 128.2, 127.5, 126.7, 125.6, 80.4, 65.3, 54.9, 21.6, 21.2. **HR-MS:** *calcd.* for  $C_{25}H_{25}NO_3S$ : 420.1628 [(M+H)<sup>+</sup>]; *found*: 420.1633 [(M+H)<sup>+</sup>].

### (Z)-4-(4-Methoxybenzylidene)-3-phenyl-1-tosylpyrrolidin-3-ol (2n)

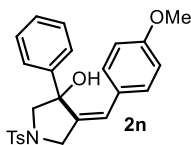

According to **GP5** from **1n** (86.0 mg, 198  $\mu$ mol) with 4-CzIPN (3.2 mg, 4.0  $\mu$ mol, 2.0 mol%) and **HEH-1** (62.8 mg, 248  $\mu$ mol, 1.25 equiv.) in MeOH (4 mL) within 16 h. The isomers could be separated by flash chromatography on silica gel (4:1:1 *n*-pentane/Et<sub>2</sub>O/CH<sub>2</sub>Cl<sub>2</sub>). The title compound was obtained as yellow oil (81.1 mg, 94% for both isomers, *Z/E* = 10:1). *R<sub>f</sub>* (1:2 *n*-pentane/Et<sub>2</sub>O) = 0.55 (*Z*-isomer); 0.50 (*E*-isomer). **<sup>1</sup>H NMR** (500 MHz, CDCl<sub>3</sub>)  $\delta$  7.66-7.70 (m, 2H), 7.30-7.34 (m, 4H), 7.14-7.22 (m, 3H), 6.94-7.01 (m, 2H), 6.54-6.57 (m, 2H), 6.53 (t, *J* = 2.2 Hz, 1H), 4.29 (dd, *J* = 13.9, 1.9 Hz, 1H), 4.06 (dd, *J* = 13.9, 2.3 Hz, 1H), 3.67 (s, 3H), 3.57 (d, *J* = 10.0 Hz, 1H), 3.27 (d, *J* = 10.1 Hz, 1H), 2.79 (brs, 1H), 2.44 (s, 3H); **<sup>13</sup>C NMR** (126 MHz, CDCl<sub>3</sub>)  $\delta$  159.1, 144.2, 142.1, 138.8, 132.1, 130.6, 129.9, 128.4, 128.3, 127.6, 127.1, 126.6, 125.7, 113.5, 80.4, 65.6, 55.3, 55.0, 21.7. **HR-MS:** *calcd.* for  $C_{25}H_{25}NO_4S$ : 436.1577 [(M+H)<sup>+</sup>]; *found*: 436.1582 [(M+H)<sup>+</sup>].

### 3-phenyl-1-tosyl-4-vinylpyrrolidin-3-ol (4a)

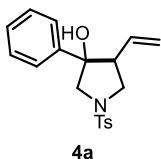

According to **GP6** from **3a** (68.3 mg, 200  $\mu$ mol) with 4-CzIPN (3.2 mg, 4.0  $\mu$ mol, 2 mol%) and **HEH-1** (63.6 mg, 250  $\mu$ mol, 1.25 equiv.) in DMSO (6 mL) within 24 h. Flash chromatography on silica gel (3:1 *n*-pentane/EtOAc) provided the title compound (50.8 mg, 74%). *R<sub>f</sub>* (4:1 *n*-pentane/ EtOAc) = 0.4.

**4a-1, major:** white solid, **m.p.** = 127 °C. **<sup>1</sup>H NMR** (400 MHz, CDCl<sub>3</sub>)  $\delta$  7.72-7.65 (m, 2H), 7.30-7.15 (m, 7H), 5.50 (ddd, *J* = 14.0, 8.4, 5.2 Hz, 1H), 5.08-5.03 (m, 1H), 4.95-4.88 (m, 1H), 3.69-3.62 (m, 1H), 3.61-3.50 (m, 2H), 3.36 (dd, *J* = 8.8, 7.6 Hz, 1H), 3.05-2.97 (m, 1H), 2.36 (s, 3H), 2.06-1.97 (m, 1H); **<sup>13</sup>C NMR** (101 MHz, CDCl<sub>3</sub>)  $\delta$  143.6, 140.6, 134.1, 131.0, 129.7, 128.5, 127.7, 127.6, 125.2, 120.1, 81.1, 62.0, 52.6, 50.3, 21.6. **HR-MS** (+ p ESI) *m/z*: [M+Na]<sup>+</sup> *Calcd* for  $C_{19}H_{21}NNaO_3S^+$ : 366.1134; *found*: 366.1143.

**4a-2, minor:** yellow solid, **m.p.** = 118 °C. **<sup>1</sup>H NMR** (400 MHz, CDCl<sub>3</sub>) δ 7.81-7.75 (m, 2H), 7.37-7.33 (m, 2H), 7.33-7.24 (m, 5H), 5.11 (ddd, *J* = 14.0, 8.4, 6.4 Hz, 1H), 4.93 (dt, *J* = 13.6, 1.2 Hz, 1H), 4.89 (ddd, *J* = 8.0, 1.2, 0.8 Hz, 1H), 3.7 (d, *J* = 8.4 Hz, 1H), 3.73 (dd, *J* = 8.0, 5.6 Hz, 1H), 3.54 (dd, *J* = 8.8, 0.8 Hz, 1H), 3.40 (dd, *J* = 7.6, 3.6 Hz, 1H), 2.93-2.87 (m, 1H), 2.44 (s, 3H), 1.99-1.92 (m, 1H); **<sup>13</sup>C NMR** (101 MHz, CDCl<sub>3</sub>) δ 143.7, 140.1, 134.6, 134.2, 129.8, 128.5, 128.3, 127.6, 126.2, 118.0, 82.1, 57.5, 53.5, 51.3, 21.6. **HR-MS** (+ p ESI) *m/z*: [M+Na]<sup>+</sup> Calcd for C<sub>19</sub>H<sub>21</sub>NNaO<sub>3</sub>S<sup>+</sup>: 366.1134; *found*: 366.1137.

### 3-(*p*-tolyl)-1-tosyl-4-vinylpyrrolidin-3-ol (**4b**)

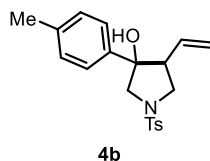

According to **GP6** from **3b** (71.0 mg, 200 μmol) with 4-CzIPN (3.2 mg, 4.0 μmol, 2 mol%) and **HEH-1** (63.6 mg, 250 μmol, 1.25 equiv.) in DMSO (6 mL) within 50 h. Flash chromatography on silica gel (3:1 *n*-pentane/EtOAc) provided the title compound (59.2 mg, 83%). **R<sub>f</sub>** (4:1 *n*-pentane/ EtOAc) = 0.4.

**4b-1, major:** white solid, **m.p.** = 103 °C. **<sup>1</sup>H NMR** (400 MHz, CDCl<sub>3</sub>) δ 7.79-7.74 (m, 2H), 7.37-7.32 (m, 2H), 7.25-7.20 (m, 2H), 7.16-7.11 (m, 2H), 5.58 (ddd, *J* = 17.2, 10.8, 6.8 Hz, 1H), 5.15 (dt, *J* = 10.8, 1.2 Hz, 1H), 5.01 (dt, *J* = 17.6, 1.2 Hz, 1H), 3.73 (dd, *J* = 9.6, 8.0 Hz, 1H), 3.66-3.62 (m, 1H), 3.60-3.56 (m, 1H), 3.44 (dd, *J* = 10.8, 9.6 Hz, 1H), 3.13-3.05 (m, 1H), 2.45 (s, 3H), 2.32 (s, 3H), 1.86 (brs, 1H); **<sup>13</sup>C NMR** (101 MHz, CDCl<sub>3</sub>) δ 143.6, 137.7, 137.6, 134.4, 131.2, 129.8, 129.3, 127.7, 125.1, 120.1, 81.1, 62.1, 52.5, 50.3, 21.6, 21.0. **HR-MS** (+ p APCI) *m/z*: [M+H]<sup>+</sup> Calcd for C<sub>20</sub>H<sub>24</sub>NO<sub>3</sub>S<sup>+</sup>: 358.1471; *found*: 358.1471.

**4b-2, minor:** yellow oil. **<sup>1</sup>H NMR** (400 MHz, CDCl<sub>3</sub>) δ 7.80-7.75 (m, 2H), 7.36-7.32 (m, 2H), 7.17-7.13 (m, 2H), 7.13-7.08 (m, 2H), 5.12 (ddd, *J* = 14.0, 8.4, 6.4 Hz, 1H), 4.93 (dt, *J* = 13.6, 1.2 Hz, 1H), 4.90-4.86 (m, 1H), 3.96-3.92 (m, 1H), 3.72 (dd, *J* = 7.6, 5.2 Hz, 1H), 3.55-3.51 (m, 1H), 3.41-3.36 (m, 1H), 2.91-2.85 (m, 1H), 2.44 (s, 3H), 2.31 (s, 3H), 2.01-1.93 (m, 1H); **<sup>13</sup>C NMR** (101 MHz, CDCl<sub>3</sub>) δ 143.6, 138.0, 137.2, 134.8, 134.2, 129.8, 129.2, 127.6, 126.1, 117.8, 81.9, 57.5, 53.3, 51.3, 21.6, 21.1. **HR-MS** (+ p APCI) *m/z*: [M+H]<sup>+</sup> Calcd for C<sub>20</sub>H<sub>24</sub>NO<sub>3</sub>S<sup>+</sup>: 358.1471; *found*: 358.1470.

### 3-(4-methoxyphenyl)-1-tosyl-4-vinylpyrrolidin-3-ol (**4c**)

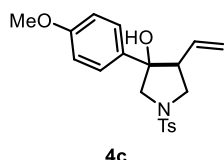

According to **GP6** from **3c** (74.3 mg, 200  $\mu$ mol) with 4-CzIPN (3.2 mg, 4.0  $\mu$ mol, 2 mol%) and **HEH-1** (63.6 mg, 250  $\mu$ mol, 1.25 equiv.) in DMSO (6 mL) within 72 h. Flash chromatography on silica gel (2:1 *n*-pentane/EtOAc) provided the title compound (33.6 mg, 45%).  $R_f$  (3:1 *n*-pentane/ EtOAc) = 0.4.

**4c-1, major:** colorless oil.  $^1\text{H NMR}$  (400 MHz,  $\text{CDCl}_3$ )  $\delta$  7.79-7.75 (m, 2H), 7.37-7.32 (m, 2H), 7.29-7.26(m, 1H), 7.26-7.24 (m, 1H), 6.88-6.83 (m, 2H), 5.59 (ddd,  $J$  = 17.2, 10.8, 6.8 Hz, 1H), 5.16 (dt,  $J$  = 10.4, 1.6 Hz, 1H), 5.02 (dt,  $J$  = 17.2, 1.6 Hz, 1H), 3.79 (s, 3H), 3.73 (dd,  $J$  = 9.2, 7.6 Hz, 1H), 3.65-3.60 (m, 1H), 3.59-3.55 (m, 1H), 3.43 (dd,  $J$  = 10.8, 9.2 Hz, 1H), 3.13-3.04 (m, 1H), 2.45 (s, 3H), 1.77 (brs, 1H);  $^{13}\text{C NMR}$  (101 MHz,  $\text{CDCl}_3$ )  $\delta$  159.2, 143.6, 134.4, 132.7, 131.3, 129.8, 127.7, 126.5, 120.2, 114.0, 81.0, 62.0, 55.4, 52.4, 50.3, 21.7. **HR-MS** (+ p APCI)  $m/z$ :  $[\text{M}+\text{H}]^+$  Calcd for  $\text{C}_{20}\text{H}_{24}\text{NO}_4\text{S}^+$ : 374.1421; *found*: 374.1421.

**4c-2, minor:** colorless oil.  $^1\text{H NMR}$  (400 MHz,  $\text{CDCl}_3$ )  $\delta$  7.80-7.76 (m, 2H), 7.37-7.32 (m, 2H), 7.22-7.17 (m, 2H), 6.85-6.80 (m, 2H), 5.13 (ddd,  $J$  = 17.2, 10.4, 8.0 Hz, 1H), 4.97-4.87 (m, 2H), 3.93 (d,  $J$  = 10.4 Hz, 1H), 3.79 (s, 3H), 3.72 (dd,  $J$  = 10.0, 6.8 Hz, 1H), 3.52 (dd,  $J$  = 10.4, 0.8 Hz, 1H), 3.39 (dd,  $J$  = 9.6, 4.4 Hz, 1H), 2.91-2.83 (m, 1H), 2.44 (s, 3H), 1.87 (brs, 1H);  $^{13}\text{C NMR}$  (101 MHz,  $\text{CDCl}_3$ )  $\delta$  159.4, 143.7, 134.9, 134.4, 132.3, 129.8, 127.6, 127.5, 117.8, 113.8, 81.8, 57.6, 55.3, 53.5, 51.4, 21.6. **HR-MS** (+ p ESI)  $m/z$ :  $[\text{M}+\text{Na}]^+$  Calcd for  $\text{C}_{20}\text{H}_{23}\text{NNaO}_4\text{S}^+$ : 396.1240; *found*: 396.1245.

### 3-([1,1'-biphenyl]-4-yl)-1-tosyl-4-vinylpyrrolidin-3-ol (**4d**)

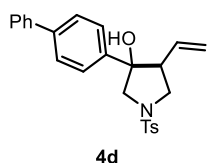

According to **GP6** from **3d** (83.5 mg, 200  $\mu$ mol) with 4-CzIPN (3.2 mg, 4.0  $\mu$ mol, 2 mol%) and **HEH-1** (63.6 mg, 250  $\mu$ mol, 1.25 equiv.) in DMSO (6 mL) within 24 h. Flash chromatography on silica gel (2:1 *n*-pentane/EtOAc) provided the title compound (63.1 mg, 75%).  $R_f$  (3:1 *n*-pentane/ EtOAc) = 0.4.

**4d-1, major:** white solid, **m.p.** = 133  $^\circ\text{C}$ .  $^1\text{H NMR}$  (400 MHz,  $\text{CDCl}_3$ )  $\delta$  7.82-7.77 (m, 2H), 7.60-7.54 (m, 4H), 7.47-7.40 (m, 4H), 7.38-7.32 (m, 3H), 5.63 (ddd,  $J$  = 17.6, 10.8, 6.8 Hz, 1H), 5.17 (dt,  $J$  = 10.4, 1.2 Hz, 1H), 5.04 (dt,  $J$  = 17.6, 1.2 Hz, 1H), 3.77 (dd,  $J$  = 9.6, 8.0 Hz, 1H), 3.74-3.69 (m, 1H), 3.68-3.63 (m,

1H), 3.48 (dd,  $J = 10.8, 9.6$  Hz, 1H), 3.18-3.09 (m, 1H), 2.45 (s, 3H), 2.14 (brs, 1H);  $^{13}\text{C}$  NMR (101 MHz,  $\text{CDCl}_3$ )  $\delta$  143.6, 140.6, 140.3, 139.7, 134.3, 131.1, 129.8, 128.8, 127.6, 127.5, 127.1, 127.0, 125.7, 120.1, 81.1, 62.0, 52.7, 50.4, 21.6. **HR-MS** (+ p ESI)  $m/z$ :  $[\text{M}+\text{Na}]^+$  Calcd for  $\text{C}_{25}\text{H}_{25}\text{NNaO}_3\text{S}^+$ : 442.1447; *found*: 442.1445.

### 3-(4-fluorophenyl)-1-tosyl-4-vinylpyrrolidin-3-ol (4e)

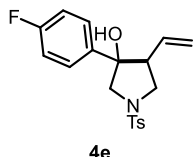

According to **GP6** from **3c** (71.9 mg, 200  $\mu\text{mol}$ ) with 4-CzIPN (3.2 mg, 4.0  $\mu\text{mol}$ , 2 mol%) and **HEH-1** (63.6 mg, 250  $\mu\text{mol}$ , 1.25 equiv.) in DMSO (6 mL) within 24 h. Flash chromatography on silica gel (2:1 *n*-pentane/EtOAc) provided the title compound (52.8 mg, 73%).  $R_f$  (3:1 *n*-pentane/ EtOAc) = 0.4.

**4e-1, major**: yellow solid, **m.p.** = 112  $^\circ\text{C}$ .  $^1\text{H}$  NMR (500 MHz,  $\text{CDCl}_3$ )  $\delta$  7.76-7.72 (m, 2H), 7.35-7.28 (m, 4H), 7.02-6.95 (m, 2H), 5.56 (ddd,  $J = 17.5, 10.5, 6.5$  Hz, 1H), 5.13 (dt,  $J = 10.5, 1.5$  Hz, 1H), 4.98 (dt,  $J = 17.5, 1.0$  Hz, 1H), 3.70 (dd,  $J = 14.5, 7.5$  Hz, 1H), 3.63-3.56 (m, 2H), 3.41 (dd,  $J = 11.0, 9.5$  Hz, 1H), 3.06-2.99 (m, 1H), 2.43 (s, 3H), 2.17 (brs, 1H);  $^{13}\text{C}$  NMR (126 MHz,  $\text{CDCl}_3$ )  $\delta$  162.2 (d,  $J_{\text{C-F}} = 247.8$  Hz), 143.7, 136.5 (d,  $J_{\text{C-F}} = 3.3$  Hz), 134.0, 130.9, 129.8, 127.6, 127.1 (d,  $J_{\text{C-F}} = 8.7$  Hz), 120.3, 115.3 (d,  $J_{\text{C-F}} = 20.8$  Hz), 80.8, 61.9, 52.8, 50.3, 21.6;  $^{19}\text{F}$  NMR (471 MHz,  $\text{CDCl}_3$ )  $\delta$  -114.7 (m). **HR-MS** (- p ESI)  $m/z$ :  $[\text{M}-\text{H}]^-$  Calcd for  $\text{C}_{19}\text{H}_{19}\text{FNO}_3\text{S}$ : 360.1075; *found*: 360.1073.

**4e-2, minor**: yellow solid, **m.p.** = 107  $^\circ\text{C}$ .  $^1\text{H}$  NMR (500 MHz,  $\text{CDCl}_3$ )  $\delta$  7.79-7.75 (m, 2H), 7.37-7.33 (m, 2H), 7.28-7.23 (m, 2H), 7.01-6.95 (m, 2H), 5.09 (ddd,  $J = 17.5, 10.5, 8.0$  Hz, 1H), 4.5-4.88 (m, 2H), 3.2 (d,  $J = 10.5$  Hz, 1H), 3.72 (dd,  $J = 10.0, 7.0$  Hz, 1H), 3.52 (dd,  $J = 10.5, 1.0$  Hz, 1H), 3.36 (dd,  $J = 9.5, 4.5$  Hz, 1H), 2.89-2.83 (m, 1H), 2.45 (s, 3H), 2.07-1.99 (m, 1H);  $^{13}\text{C}$  NMR (126 MHz,  $\text{CDCl}_3$ )  $\delta$  162.4 (d,  $J_{\text{C-F}} = 249.0$  Hz), 143.8, 136.0 (d,  $J_{\text{C-F}} = 4.0$  Hz), 134.4, 134.1, 129.9, 128.1 (d,  $J_{\text{C-F}} = 7.6$  Hz), 127.6, 118.3, 115.3 (d,  $J_{\text{C-F}} = 21.9$  Hz), 81.6, 57.7, 53.6, 51.2, 21.7;  $^{19}\text{F}$  NMR (471 MHz,  $\text{CDCl}_3$ )  $\delta$  -113.6 (m). **HR-MS** (+ p ESI)  $m/z$ :  $[\text{M}+\text{Na}]^+$  Calcd for  $\text{C}_{19}\text{H}_{20}\text{FNNaO}_3\text{S}^+$ : 384.1040; *found*: 384.1042.

### 3-(4-bromophenyl)-1-tosyl-4-vinylpyrrolidin-3-ol (4f)



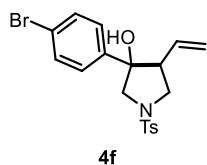

According to **GP6** from **3c** (84.1 mg, 200  $\mu$ mol) with 4-CzIPN (3.2 mg, 4.0  $\mu$ mol, 2 mol%) and **HEH-1** (63.6 mg, 250  $\mu$ mol, 1.25 equiv.) in DMSO (6 mL) within 24 h. Flash chromatography on silica gel (2:1 *n*-pentane/EtOAc) provided the title compound (67.6 mg, 80%).  $R_f$  (3:1 *n*-pentane/ EtOAc) = 0.4.

**4f-1, major**: white solid, **m.p.** = 116 °C.  $^1\text{H NMR}$  (400 MHz,  $\text{CDCl}_3$ )  $\delta$  7.77-7.71 (m, 2H), 7.46-7.40 (m, 2H), 7.36-7.31 (m, 2H), 7.24-7.19 (m, 2H), 5.55 (ddd,  $J$  = 17.6, 10.4, 6.8 Hz, 1H), 5.13 (dt,  $J$  = 10.8, 1.2 Hz, 1H), 4.98 (dt,  $J$  = 17.6, 1.2 Hz, 1H), 3.70 (dd,  $J$  = 9.6, 8.0 Hz, 1H), 3.63-3.55 (m, 2H), 3.41 (dd,  $J$  = 10.8, 9.6 Hz, 1H), 3.06-2.97 (m, 1H), 2.44 (s, 3H), 2.13 (brs, 1H);  $^{13}\text{C NMR}$  (101 MHz,  $\text{CDCl}_3$ )  $\delta$  143.8, 139.8, 134.1, 131.6, 130.8, 129.8, 127.6, 127.1, 121.9, 120.4, 80.9, 61.8, 52.9, 50.3, 21.6. **HR-MS** (+ p ESI)  $m/z$ :  $[\text{M}+\text{H}]^+$  Calcd for  $\text{C}_{19}\text{H}_{21}\text{BrNO}_3\text{S}^+$ : 422.0420; *found*: 422.0426.

#### 1-tosyl-3-(4-(trifluoromethyl)phenyl)-4-vinylpyrrolidin-3-ol (**4g**)

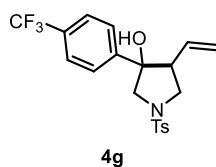

According to **GP6** from **3c** (81.9 mg, 200  $\mu$ mol) with 4-CzIPN (3.2 mg, 4.0  $\mu$ mol, 2 mol%) and **HEH-1** (63.6 mg, 250  $\mu$ mol, 1.25 equiv.) in DMSO (6 mL) within 24 h. Flash chromatography on silica gel (2:1 *n*-pentane/EtOAc) provided the title compound (65.9 mg, 80%).  $R_f$  (3:1 *n*-pentane/ EtOAc) = 0.4.

**4g-1, major**: yellow solid, **m.p.** = 106 °C.  $^1\text{H NMR}$  (500 MHz,  $\text{CDCl}_3$ )  $\delta$  7.77-7.72 (m, 2H), 7.59-7.55 (m, 2H), 7.49-6.45 (m, 2H), 7.36-7.32 (m, 2H), 5.55 (ddd,  $J$  = 17.5, 10.5, 6.5 Hz, 1H), 5.13 (ddd,  $J$  = 10.5, 2.5, 1.5 Hz, 1H), 4.97 (ddd,  $J$  = 17.5, 2.5, 1.5 Hz, 1H), 3.2 (dd,  $J$  = 9.0, 8.0 Hz, 1H), 3.67-3.60 (m, 2H), 3.44 (dd,  $J$  = 11.0, 9.5 Hz, 1H), 3.10-3.03 (m, 1H), 2.44 (s, 3H), 2.36-2.31 (m, 1H);  $^{13}\text{C NMR}$  (126 MHz,  $\text{CDCl}_3$ )  $\delta$  144.8, 143.9, 133.9, 130.5, 130.0 (q,  $J_{\text{C-F}}$  = 32.5 Hz), 129.9, 127.6, 125.8, 125.4 (q,  $J_{\text{C-F}}$  = 3.7 Hz), 124.0 (q,  $J_{\text{C-F}}$  = 272.5 Hz), 120.6, 81.0, 61.9, 53.1, 50.3, 21.6;  $^{19}\text{F NMR}$  (471 MHz,  $\text{CDCl}_3$ )  $\delta$  -62.6 (s). **HR-MS** (- p ESI)  $m/z$ :  $[\text{M}-\text{H}]^-$  Calcd for  $\text{C}_{20}\text{H}_{19}\text{F}_3\text{NO}_3\text{S}^-$ : 410.1043; *found*: 410.1034.

**4g-2, minor**: white solid, **m.p.** = 136 °C.  $^1\text{H NMR}$  (500 MHz,  $\text{CDCl}_3$ )  $\delta$  7.80-7.76 (m, 2H), 7.57-7.53 (m, 2H), 7.43-7.39 (m, 2H), 7.38-7.34 (m, 2H), 5.06 (ddd,  $J$  = 17.0, 10.0, 8.0 Hz, 1H), 4.96-4.90 (m, 2H), 3.9 (d,  $J$  = 11.0 Hz, 1H), 3.74 (dd,  $J$  = 10.0, 7.0 Hz, 1H), 3.55 (dd,  $J$  = 10.5, 1.0 Hz, 1H), 3.36 (dd,  $J$  = 10.0,

5.0 Hz, 1H), 2.93-2.87 (m, 1H), 2.46 (s, 3H), 2.20-2.15 (m, 1H);  $^{13}\text{C}$  NMR (126 MHz,  $\text{CDCl}_3$ )  $\delta$  144.2, 144.0, 133.9, 133.9, 130.4 (q,  $J_{\text{C-F}} = 32.4$  Hz), 130.0, 127.6, 126.7, 125.4 (q,  $J_{\text{C-F}} = 3.9$  Hz), 124.0 (q,  $J_{\text{C-F}} = 272.5$  Hz), 118.7, 81.7, 57.8, 53.9, 51.1, 21.7;  $^{19}\text{F}$  NMR (471 MHz,  $\text{CDCl}_3$ )  $\delta$  -62. (s). **HR-MS** (+ p APCI)  $m/z$ :  $[\text{M}+\text{H}]^+$  Calcd for  $\text{C}_{20}\text{H}_{21}\text{F}_3\text{NO}_3\text{S}^+$ : 412.1189; *found*: 412.1191.

### 3-(4-chlorophenyl)-1-tosyl-4-vinylpyrrolidin-3-ol (4h)

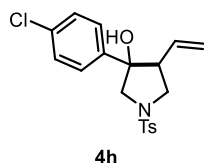

According to **GP6** from **3c** (75.2 mg, 200  $\mu\text{mol}$ ) with 4-CzIPN (3.2 mg, 4.0  $\mu\text{mol}$ , 2 mol%) and **HEH-1** (63.6 mg, 250  $\mu\text{mol}$ , 1.25 equiv.) in DMSO (6 mL) within 48 h. Flash chromatography on silica gel (2:1 *n*-pentane/EtOAc) provided the title compound (68.4 mg, 90%).  $R_f$  (3:1 *n*-pentane/ EtOAc) = 0.4.

**4h-1, major**: colorless oil.  $^1\text{H}$  NMR (400 MHz,  $\text{CDCl}_3$ )  $\delta$  7.77-7.72 (m, 2H), 7.36-7.31 (m, 2H), 7.29-7.27 (m, 4H), 5.55 (ddd,  $J = 17.6, 10.8, 6.8$  Hz, 1H), 5.14 (dt,  $J = 10.8, 1.2$  Hz, 1H), 4.98 (dt,  $J = 17.6, 1.2$  Hz, 1H), 3.71 (dd,  $J = 9.2, 7.6$  Hz, 1H), 3.64-3.56 (m, 2H), 3.42 (dd,  $J = 10.8, 9.6$  Hz, 1H), 3.07-2.99 (m, 1H), 2.44 (s, 3H), 2.13-2.07 (m, 1H);  $^{13}\text{C}$  NMR (101 MHz,  $\text{CDCl}_3$ )  $\delta$  143.8, 139.3, 134.2, 133.7, 130.8, 129.8, 128.7, 127.6, 126.8, 120.4, 80.9, 61.9, 52.9, 50.3, 21.6. **HR-MS** (- p ESI)  $m/z$ :  $[\text{M}-\text{H}]^-$  Calcd for  $\text{C}_{19}\text{H}_{19}\text{ClNO}_3\text{S}$ : 376.0780; *found*: 376.0779.

**4h-2, minor**: white solid, **m.p.** = 85  $^\circ\text{C}$ .  $^1\text{H}$  NMR (500 MHz,  $\text{CDCl}_3$ )  $\delta$  7.77-7.73 (m, 2H), 7.37-7.33 (m, 2H), 7.27-7.23 (m, 2H), 7.23-7.18 (m, 2H), 5.07 (ddd,  $J = 17.0, 10.0, 8.0$  Hz, 1H), 4.94- 4.88 (m, 2H), 3.89 (d,  $J = 10.5$  Hz, 1H), 3.70 (dd,  $J = 10.0, 7.0$  Hz, 1H), 3.51 (dd,  $J = 10.5, 1.0$  Hz, 1H), 3.33 (dd,  $J = 9.5, 5.0$  Hz, 1H), 2.88-2.82 (m, 1H), 2.44 (s, 3H), 2.26-2.19 (m, 1H);  $^{13}\text{C}$  NMR (126 MHz,  $\text{CDCl}_3$ )  $\delta$  143.9, 138.8, 134.2, 134.1, 134.0, 129.9, 128.6, 127.7, 127.6, 118.4, 81.5, 57.7, 53.6, 51.2, 21.6. **HR-MS** (+ p ESI)  $m/z$ :  $[\text{M}+\text{H}]^+$  Calcd for  $\text{C}_{19}\text{H}_{21}\text{ClNO}_3\text{S}^+$ : 378.0925; *found*: 378.0927.

### 3-(2-chlorophenyl)-1-tosyl-4-vinylpyrrolidin-3-ol (4i)

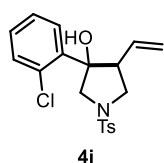

According to **GP6** from **3c** (75.2 mg, 200  $\mu$ mol) with 4-CzIPN (3.2 mg, 4.0  $\mu$ mol, 2 mol%) and **HEH-1** (63.6 mg, 250  $\mu$ mol, 1.25 equiv.) in DMSO (6 mL) within 24 h. Flash chromatography on silica gel (2:1 *n*-pentane/EtOAc) provided the title compound (54.7 mg, 72%).  $R_f$  (3:1 *n*-pentane/ EtOAc) = 0.4.

**4i-1, major:** colorless oil.  $^1\text{H NMR}$  (400 MHz,  $\text{CDCl}_3$ )  $\delta$  7.79-7.74 (m, 2H), 7.38-7.32 (m, 3H), 7.28-7.19 (m, 3H), 5.55 (ddd,  $J$  = 17.6, 10.8, 6.8 Hz, 1H), 5.17 (ddd,  $J$  = 10.8, 2.4, 1.2 Hz, 1H), 5.01 (ddd,  $J$  = 17.6, 2.4, 1.2 Hz, 1H), 3.74 (dd,  $J$  = 9.6, 8.0 Hz, 1H), 3.65-3.56 (m, 2H), 3.43 (dd,  $J$  = 11.2, 9.6 Hz, 1H), 3.11-3.01 (m, 1H), 2.45 (s, 3H), 2.00-1.91 (brs, 1H);  $^{13}\text{C NMR}$  (101 MHz,  $\text{CDCl}_3$ )  $\delta$  143.8, 143.0, 134.7, 134.2, 130.6, 129.9, 128.1, 127.7, 125.8, 123.4, 120.7, 80.9, 62.0, 52.8, 50.2, 21.7. **HR-MS** (- p ESI)  $m/z$ : [M-H] $^-$  Calcd for  $\text{C}_{19}\text{H}_{19}\text{ClNO}_3\text{S}^-$ : 376.0780; *found*: 376.077.

### 3-(3-chlorophenyl)-1-tosyl-4-vinylpyrrolidin-3-ol (**4j**)

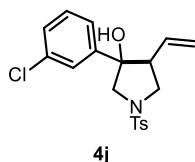

According to **GP6** from **3c** (75.2 mg, 200  $\mu$ mol) with 4-CzIPN (3.2 mg, 4.0  $\mu$ mol, 2 mol%) and **HEH-1** (63.6 mg, 250  $\mu$ mol, 1.25 equiv.) in DMSO (6 mL) within 24 h. Flash chromatography on silica gel (2:1 *n*-pentane/EtOAc) provided the title compound (67.3 mg, 89%).  $R_f$  (3:1 *n*-pentane/ EtOAc) = 0.4.

**4j-1, major:** white solid, **m.p.** = 116  $^\circ\text{C}$ .  $^1\text{H NMR}$  (400 MHz,  $\text{CDCl}_3$ )  $\delta$  7.80-7.75 (m, 2H), 7.58-7.53 (m, 1H), 7.37-7.32 (m, 3H), 7.25-7.21 (m, 2H), 5.68-5.58 (m, 1H), 5.22-5.18 (m, 1H), 5.11 (dt,  $J$  = 17.2, 1.2 Hz, 1H), 4.03-3.98 (m, 1H), 3.76- 3.67 (m, 3H), 3.44-3.36 (m, 1H), 2.45 (s, 3H), 2.44 (brs, 1H);  $^{13}\text{C NMR}$  (101 MHz,  $\text{CDCl}_3$ )  $\delta$  143.7, 137.4, 134.3, 131.8, 131.7, 131.6, 129.8, 129.5, 128.5, 127.7, 127.2, 120.3, 80.8, 59.0, 50.4, 49.2, 21.6. **HR-MS** (+ p ESI)  $m/z$ : [M+H] $^+$  Calcd for  $\text{C}_{19}\text{H}_{21}\text{ClNO}_3\text{S}^+$ : 378.0925; *found*: 378.0925.

**4j-2, minor:** colorless oil.  $^1\text{H NMR}$  (400 MHz,  $\text{CDCl}_3$ )  $\delta$  7.81-7.76 (m, 2H), 7.37-7.33 (m, 1H), 7.33-7.29 (m, 2H), 7.25-7.15 (m, 3H), 5.24 (ddd,  $J$  = 17.2, 10.4, 8.0 Hz, 1H), 5.03 (dt,  $J$  = 17.2, 1.2 Hz, 1H), 4.82 (ddd,  $J$  = 10.4, 1.6, 0.8 Hz, 1H), 4.08 (dd,  $J$  = 10.8, 1.6 Hz, 1H), 3.78-3.75 (m, 1H), 3.74 (dd,  $J$  = 3.6, 2.4 Hz, 1H), 3.72-3.66 (m, 1H), 3.54 (dd,  $J$  = 9.2, 0.8 Hz, 1H), 2.76-2.73 (m, 1H), 2.41 (s, 3H);  $^{13}\text{C NMR}$  (101 MHz,  $\text{CDCl}_3$ )  $\delta$  143.5, 136.8, 135.0, 134.4, 132.7, 131.5, 129.7, 129.6, 128.3, 127.7, 127.2, 117.3, 83.0, 56.1, 51.3, 51.0, 21.6. **HR-MS** (+ p ESI)  $m/z$ : [M+Na] $^+$  Calcd for  $\text{C}_{19}\text{H}_{20}\text{ClNNaO}_3\text{S}^+$ : 400.0745; *found*: 400.0746.

### 3-(naphthalen-2-yl)-1-tosyl-4-vinylpyrrolidin-3-ol (4k)

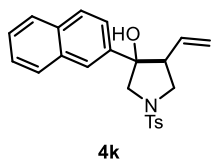

According to **GP6** from **3b** (78.3 mg, 200  $\mu$ mol) with 4-CzIPN (3.2 mg, 4.0  $\mu$ mol, 2 mol%) and **HEH-1** (63.6 mg, 250  $\mu$ mol, 1.25 equiv.) in DMSO (6 mL) within 24 h. Flash chromatography on silica gel (3:1 *n*-pentane/EtOAc) provided the title compound as (65.8 mg, 83%).  $R_f$  (4:1 *n*-pentane/ EtOAc).

**4k-1, major:** white solid, **m.p.** = 132 °C.  $^1\text{H NMR}$  (500 MHz,  $\text{CDCl}_3$ )  $\delta$  7.86 (d,  $J$  = 2.0 Hz 1H), 7.83-7.77 (m, 5H), 7.51-7.46 (m, 2H), 7.39-7.33 (m, 3H), 5.59 (ddd,  $J$  = 17.5, 10.5, 6.5 Hz, 1H), 5.13 (dt,  $J$  = 10.5, 1.5 Hz, 1H), 5.00 (dt,  $J$  = 17.5, 1.5 Hz, 1H), 3.81- 3.76 (m, 2H), 3.67-3.64 (m, 1H), 3.49 (dd,  $J$  = 11.0, 9.5 Hz, 1H), 3.25-3.17 (m, 1H), 2.46 (s, 3H), 2.14-2.10 (m, 1H);  $^{13}\text{C NMR}$  (126 MHz,  $\text{CDCl}_3$ )  $\delta$  143.7, 138.0, 134.2, 133.0, 132.7, 131.0, 129.8, 128.4, 128.2, 127.6, 127.6, 126.5, 126.4, 124.6, 123.0, 120.3, 81.4, 62.0, 52.6, 50.3, 21.6. **HR-MS** (+ p ESI)  $m/z$ :  $[\text{M}+\text{Na}]^+$  Calcd for  $\text{C}_{23}\text{H}_{23}\text{NNaO}_3\text{S}^+$ : 416.1291; *found*: 416.1293.

### 3-(thiophen-2-yl)-1-tosyl-4-vinylpyrrolidin-3-ol (4l)

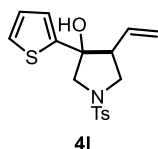

According to **GP6** from **3c** (69.5 mg, 200  $\mu$ mol) with 4-CzIPN (3.2 mg, 4.0  $\mu$ mol, 2 mol%) and **HEH-1** (63.6 mg, 250  $\mu$ mol, 1.25 equiv.) in DMSO (6 mL) within 24 h. Flash chromatography on silica gel (2:1 *n*-pentane/EtOAc) provided the title compound (45.6 mg, 65%).  $R_f$  (3:1 *n*-pentane/ EtOAc) = 0.4.

**4l-1, major:** yellow solid, **m.p.** = 122 °C.  $^1\text{H NMR}$  (400 MHz,  $\text{CDCl}_3$ )  $\delta$  7.78-7.74 (m, 2H), 7.36-7.31 (m, 2H), 7.22 (dd,  $J$  = 4.8, 1.2 Hz, 1H), 6.95 (dd,  $J$  = 5.2, 3.6 Hz, 1H), 6.92 (dd,  $J$  = 3.6, 1.2 Hz, 1H), 5.69 (ddd,  $J$  = 17.2, 10.8, 7.2 Hz, 1H), 5.22 (dt,  $J$  = 10.4, 1.2 Hz, 1H), 5.09 (dt,  $J$  = 17.6, 1.2 Hz, 1H), 3.74-3.65 (m, 3H), 3.42 (dd,  $J$  = 10.8, 9.6 Hz, 1H), 3.08-2.99 (m, 1H), 2.44 (s, 3H), 2.13 (brs, 1H);  $^{13}\text{C NMR}$  (101 MHz,  $\text{CDCl}_3$ )  $\delta$  145.5, 143.7, 134.3, 130.9, 129.8, 127.6, 127.2, 125.2, 123.8, 120.8, 80.0, 62.2, 53.6, 50.3, 21.6. **HR-MS** (+ p ESI)  $m/z$ :  $[\text{M}+\text{Na}]^+$  Calcd for  $\text{C}_{17}\text{H}_{19}\text{NNaO}_3\text{S}_2^+$ : 372.0699; *found*: 372.0701.

**4l-2, minor:** brown solid, **m.p.** = 107 °C.  $^1\text{H NMR}$  (400 MHz,  $\text{CDCl}_3$ )  $\delta$  7.78-7.74 (m, 2H), 7.36-7.32 (m, 2H), 7.23 (dd,  $J$  = 5.2, 1.2 Hz, 1H), 6.92 (dd,  $J$  = 4.8, 3.6 Hz, 1H), 6.84 (dd,  $J$  = 3.6, 1.2 Hz, 1H), 5.32-

5.22 (m, 1H), 5.02- 4.94 (m, 2H), 3.88 (d,  $J = 10.8$  Hz, 1H), 3.70 (dd,  $J = 9.6, 6.8$  Hz, 1H), 3.53 (dd,  $J = 10.4, 0.8$  Hz, 1H), 3.43 (dd,  $J = 9.6, 4.4$  Hz, 1H), 2.88-2.81 (m, 1H), 2.44 (s, 3H), 2.29 (brs, 1H);  $^{13}\text{C}$  NMR (101 MHz,  $\text{CDCl}_3$ )  $\delta$  144.4, 143.8, 134.3, 134.2, 129.8, 127.6, 126.9, 125.6, 124.4, 118.3, 80.9, 58.7, 54.3, 51.2, 21.6. **HR-MS** (+ p ESI)  $m/z$ :  $[\text{M}+\text{Na}]^+$  Calcd for  $\text{C}_{17}\text{H}_{19}\text{NNaO}_3\text{S}_2^+$ : 372.0699; *found*: 372.0704.

#### 1-(4-methoxyphenyl)-3-phenyl-4-vinylpyrrolidin-3-ol (4m)

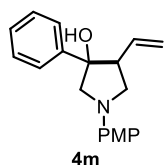

According to **GP6** from **3c** (58.7 mg, 200  $\mu\text{mol}$ ) with 4-CzIPN (3.2 mg, 4.0  $\mu\text{mol}$ , 2 mol%) and **HEH-1** (63.6 mg, 250  $\mu\text{mol}$ , 1.25 equiv.) in DMSO (6 mL) within 72 h. Flash chromatography on silica gel (2:1 *n*-pentane/EtOAc) provided the title compound (37.5 mg, 63%).  $R_f$  (3:1 *n*-pentane/ EtOAc) = 0.4.

**4m-1, major**: colorless oil.  $^1\text{H}$  NMR (400 MHz,  $\text{CDCl}_3$ )  $\delta$  7.58- 7.53 (m, 2H), 7.43-7.37 (m, 2H), 7.34-7.28 (m, 1H), 6.90-6.84 (m, 2H), 6.59-6.50 (m, 2H), 5.84 (ddd,  $J = 17.2, 10.8, 7.2$  Hz, 1H), 5.23 (dt,  $J = 10.4, 1.2$  Hz, 1H), 5.16 (dt,  $J = 17.6, 1.6$  Hz, 1H), 3.77 (s, 3H), 3.76-3.71 (m, 1H), 3.66-3.54 (m, 3H), 3.43-3.33 (m, 1H), 2.22 (brs, 1H);  $^{13}\text{C}$  NMR (101 MHz,  $\text{CDCl}_3$ )  $\delta$  151.4, 142.5, 142.2, 133.0, 128.5, 127.5, 125.5, 119.4, 115.3, 112.5, 81.5, 63.7, 56.1, 52.8, 51.3. **HR-MS** (+ p ESI)  $m/z$ :  $[\text{M}+\text{H}]^+$  Calcd for  $\text{C}_{19}\text{H}_{22}\text{NO}_2^+$ : 296.1645; *found*: 296.1652.

**4m-2, minor**: colorless oil.  $^1\text{H}$  NMR (400 MHz,  $\text{CDCl}_3$ )  $\delta$  7.40-7.26 (m, 5H), 6.94- 6.88 (m, 2H), 6.67-6.56 (m, 2H), 5.35-5.22 (m, 1H), 5.10-5.02 (m, 1H), 4.99-4.94 (m, 1H), 3.97-3.91 (m, 1H), 3.79 (s, 3H), 3.77-3.70 (m, 1H), 3.67-3.63 (m, 1H), 3.29-3.18 (m, 2H), 2.50-2.34 (m, 1H);  $^{13}\text{C}$  NMR (101 MHz,  $\text{CDCl}_3$ )  $\delta$  151.6, 141.8, 141.8, 135.8, 128.4, 127.8, 126.2, 117.5, 115.3, 112.6, 81.8, 60.2, 56.1, 54.4, 52.3. **HR-MS** (+ p ESI)  $m/z$ :  $[\text{M}+\text{H}]^+$  Calcd for  $\text{C}_{19}\text{H}_{22}\text{NO}_2^+$ : 296.1645; *found*: 296.1648.

#### 1-benzyl-3-phenyl-4-vinylpyrrolidin-3-ol (4n)

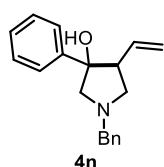

According to **GP6** from **3c** (55.5 mg, 200  $\mu$ mol) with 4-CzIPN (3.2 mg, 4.0  $\mu$ mol, 2 mol%) and **HEH-1** (63.6 mg, 250  $\mu$ mol, 1.25 equiv.) in DMSO (6 mL) within 48 h. Flash chromatography on silica gel (2:1 *n*-pentane/EtOAc) provided the title compound (22.8 mg, 41%).  $R_f$  (3:1 *n*-pentane/ EtOAc) = 0.4.

**4n-1, major:** colorless oil.  $^1\text{H NMR}$  (400 MHz,  $\text{CDCl}_3$ )  $\delta$  7.53-7.48 (m, 2H), 7.39-7.30 (m, 6H), 7.29-7.21 (m, 2H), 5.85 (ddd,  $J$  = 17.6, 10.4, 7.2 Hz, 1H), 5.11 (ddd,  $J$  = 10.4, 1.6, 1.2 Hz, 1H), 4.96 (ddd,  $J$  = 17.6, 1.6, 1.2 Hz, 1H), 3.85-3.75 (m, 2H), 3.20-3.12 (m, 1H), 3.10-3.04 (m, 1H), 2.99-2.92 (m, 3H), 2.67 (brs, 1H);  $^{13}\text{C NMR}$  (101 MHz,  $\text{CDCl}_3$ )  $\delta$  143.5, 138.8, 134.7, 128.8, 128.4, 128.2, 127.2, 127.1, 125.3, 117.9, 81.6, 68.7, 60.2, 56.9, 54.1. **HR-MS** (+ p ESI)  $m/z$ :  $[\text{M}+\text{H}]^+$  Calcd for  $\text{C}_{19}\text{H}_{22}\text{NO}^+$ : 280.1696; *found*: 280.1703.

### 3-hydroxy-3-phenyl-4-vinylcyclopentane-1,1-dicarboxylate (**4o**)

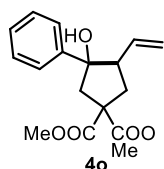

According to **GP6** from **3c** (60.4 mg, 200  $\mu$ mol) with 4-CzIPN (3.2 mg, 4.0  $\mu$ mol, 2 mol%) and **HEH-1** (63.6 mg, 250  $\mu$ mol, 1.25 equiv.) in DMSO (6 mL) within 72 h. Flash chromatography on silica gel (2:1 *n*-pentane/EtOAc) provided the title compound (37.4 mg, 61%).  $R_f$  (3:1 *n*-pentane/ EtOAc) = 0.4.

**4o-1, major:** yellow solid, **m.p.** = 127  $^{\circ}\text{C}$ .  $^1\text{H NMR}$  (400 MHz,  $\text{CDCl}_3$ )  $\delta$  7.50-7.46 (m, 2H), 7.38-7.32 (m, 2H), 7.28-7.22 (m, 1H), 5.67 (ddd,  $J$  = 17.2, 10.8, 6.4 Hz, 1H), 5.13 (dt,  $J$  = 10.8, 1.6 Hz, 1H), 5.07 (dt,  $J$  = 17.6, 1.6 Hz, 1H), 3.79 (s, 3H), 3.77 (s, 3H), 3.16-3.08 (m, 1H), 2.82-2.57 (m, 4H), 2.28 (brs, 1H);  $^{13}\text{C NMR}$  (101 MHz,  $\text{CDCl}_3$ )  $\delta$  173.4, 173.2, 143.5, 134.2, 128.3, 127.2, 125.3, 118.6, 83.3, 57.6, 53.9, 53.1, 53.1, 50.2, 36.9. **HR-MS** (+ p ESI)  $m/z$ :  $[\text{M}+\text{Na}]^+$  Calcd for  $\text{C}_{17}\text{H}_{20}\text{NaO}_5^+$ : 327.1203; *found*: 327.1207.

**4o-2, minor:** yellow solid, **m.p.** = 110  $^{\circ}\text{C}$ .  $^1\text{H NMR}$  (500 MHz,  $\text{CDCl}_3$ )  $\delta$  7.75-7.71 (m, 2H), 7.69-7.64 (m, 2H), 7.62-7.57 (m, 1H), 5.69-5.61 (m, 1H), 5.21 (dt,  $J$  = 17.0, 1.5 Hz, 1H), 5.13 (ddd,  $J$  = 10.5, 2.0, 1.0 Hz, 1H), 4.14 (s, 3H), 4.12 (s, 3H), 3.37-3.28 (m, 3H), 3.16-3.11 (m, 1H), 2.80-2.77 (m, 1H), 2.77-2.72 (m, 1H);  $^{13}\text{C NMR}$  (126 MHz,  $\text{CDCl}_3$ )  $\delta$  173.8, 172.7, 142.6, 138.0, 128.2, 127.6, 126.4, 116.0, 85.1, 58.4, 55.5, 53.3, 53.1, 45.0, 38.0. **HR-MS** (+ p APCI)  $m/z$ :  $[\text{M}-\text{OH}]^+$  Calcd for  $\text{C}_{17}\text{H}_{19}\text{O}_4$ : 287.1278; *found*: 287.1284.

### 3-phenyl-4-vinyltetrahydrofuran-3-ol (**4p**)

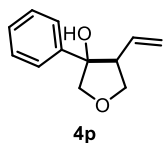

According to **GP6** from **3c** (37.6 mg, 200  $\mu$ mol) with 4-CzIPN (3.2 mg, 4.0  $\mu$ mol, 2 mol%) and **HEH-1** (63.6 mg, 250  $\mu$ mol, 1.25 equiv.) in DMSO (6 mL) within 48 h. Flash chromatography on silica gel (2:1 *n*-pentane/EtOAc) provided the title compound (28.7 mg, 75%).  $R_f$  (3:1 *n*-pentane/ EtOAc) = 0.4.

**4p-1, major:** colorless oil.  $^1\text{H NMR}$  (400 MHz,  $\text{CDCl}_3$ )  $\delta$  7.52-7.47 (m, 2H), 7.40-7.34 (m, 2H), 7.31-7.26 (m, 1H), 5.79 (ddd,  $J = 17.6, 10.4, 7.2$  Hz, 1H), 5.21 (dt,  $J = 10.4, 1.6$  Hz, 1H), 5.09 (dt,  $J = 17.6, 1.2$  Hz, 1H), 4.22 (t,  $J = 8.4$  Hz, 1H), 4.10-4.01 (m, 3H), 3.32-3.24 (m, 1H), 2.33 (brs, 1H);  $^{13}\text{C NMR}$  (101 MHz,  $\text{CDCl}_3$ )  $\delta$  141.4, 131.8, 128.5, 127.5, 125.4, 119.8, 82.4, 81.5, 71.4, 54.5. **HR-MS** (+ p APCI)  $m/z$ :  $[\text{M}+\text{H}]^+$  Calcd for  $\text{C}_{12}\text{H}_{15}\text{O}_2^+$ : 191.1067; *found*: 191.1064.

**4p-2, minor:** colorless oil.  $^1\text{H NMR}$  (400 MHz,  $\text{CDCl}_3$ )  $\delta$  7.43-7.39 (m, 2H), 7.39-7.33 (m, 2H), 7.32-7.27 (m, 1H), 5.25 (ddd,  $J = 17.2, 10.4, 8.8$  Hz, 1H), 5.02 (ddd,  $J = 16.8, 2.0, 1.2$  Hz, 1H), 4.92 (ddd,  $J = 10.0, 1.6, 0.8$  Hz, 1H), 4.38-4.30 (m, 2H), 4.04 (dd,  $J = 8.8, 0.4$  Hz, 1H), 3.83 (dd,  $J = 8.8, 6.0$  Hz, 1H), 3.16-3.08 (m, 1H), 2.27 (brs, 1H);  $^{13}\text{C NMR}$  (101 MHz,  $\text{CDCl}_3$ )  $\delta$  140.6, 135.7, 128.4, 127.9, 126.5, 117.3, 83.4, 77.5, 72.4, 55.7. **HR-MS** (+ p APCI)  $m/z$ :  $[\text{M}+\text{H}]^+$  Calcd for  $\text{C}_{12}\text{H}_{15}\text{O}_2^+$ : 191.1067; *found*: 191.1064.

## Unsuccessful results

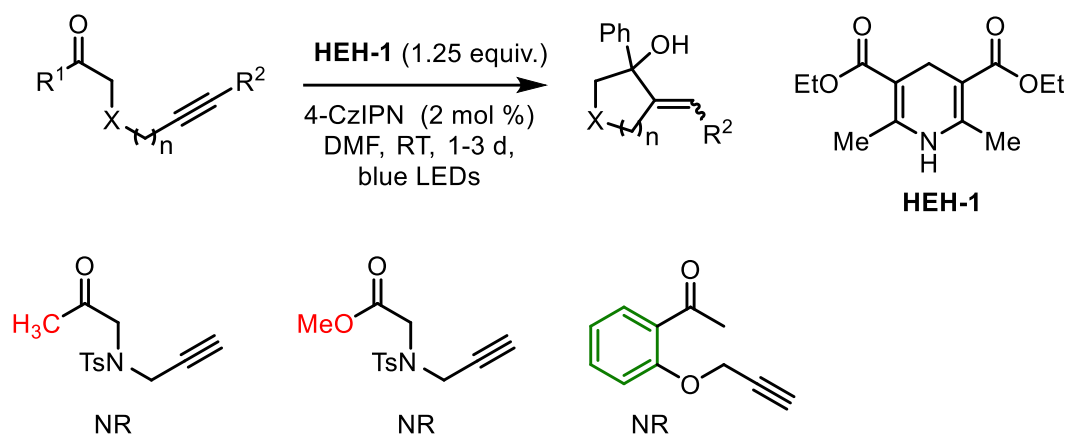

## Up-scaling experiment

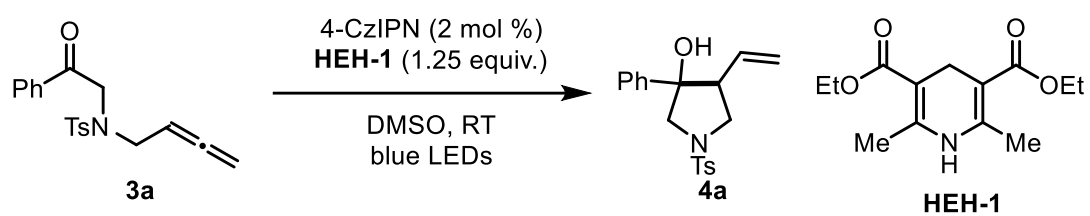

According to **GP6** from **3a** (1.07 g, 3 mmol) with 4-CzIPN (48 mg, 0.6 mmol, 2 mol%) and **HEH-1** (954 mg, 3. mmol, 1.25 equiv.) in DMSO (60 mL) within 24 h. Flash chromatography on silica gel (3:1 n-pentane/EtOAc) provided the title compound (752.1 mg, 73%, dr = 3:1).



## Transformations

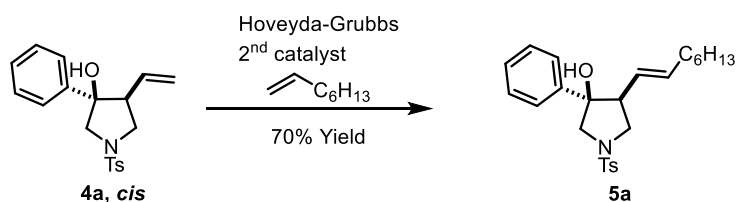

**4a** (34.3 mg, 0.1 mmol, 1 eq.) was dissolved in CH<sub>2</sub>Cl<sub>2</sub> (1 ml) and 1-Octene (94  $\mu$ l, 0.6 mmol, 6 eq.) and Hoveyda-Grubbs catalyst 2<sup>nd</sup> generation (6.2 mg, 10  $\mu$ mol, 10 mol %) were added in sequence at room temperature. After reaction mixture was stirred for 24 h under 40 °C, saturated NaHCO<sub>3</sub> (aq) was added and was stirred overnight. The reaction mixture was diluted with CH<sub>2</sub>Cl<sub>2</sub> and transferred into a separation funnel. The aqueous phase was extracted with CH<sub>2</sub>Cl<sub>2</sub> (3 x 5 mL) and the combined organic layers were dried over Na<sub>2</sub>SO<sub>4</sub>, filtered and concentrated by rotary evaporation. The crude product was purified by flash column silica gel chromatography (5:1 *n*-pentane/EtOAc) provided **5a** as colorless oil (29.0 mg, 70%). *R<sub>f</sub>* (5:1 *n*-pentane/ EtOAc) = 0.4.

### 4-((E)-oct-1-en-1-yl)-3-phenyl-1-tosylpyrrolidin-3-ol

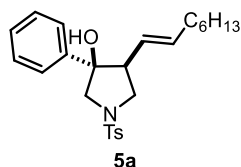

<sup>1</sup>H NMR (500 MHz, CDCl<sub>3</sub>)  $\delta$  7.79-7.75 (m, 2H), 7.37-7.30 (m, 6H), 5.40 (dtd, *J* = 15.5, 6.5, 1.5 Hz, 1H), 5.13 (dtd, *J* = 15.5, 6.5, 1.5 Hz, 1H), 3.72 (dd, *J* = 9.5, 7.5 Hz, 1H), 3.65 (dd, *J* = 11.5, 1.5 Hz, 1H), 3.60-3.56 (m, 1H), 3.38 (dd, *J* = 11.0, 9.5 Hz, 1H), 3.11-3.04 (m, 1H), 2.45 (s, 3H), 1.96-1.84 (m, 2H), 1.84-1.79 (m, 1H), 1.63-1.58 (m, 1H), 1.30-1.09 (m, 8H), 0.85 (t, *J* = 7.5 Hz, 3H); <sup>13</sup>C NMR (126 MHz, CDCl<sub>3</sub>)  $\delta$  143.6, 141.0, 137.2, 134.3, 129.8, 128.5, 127.7, 125.3, 121.9, 81.2, 61.9, 51.8, 50.7, 32.8, 31.6, 29.1, 28.7, 22.6, 21.7, 14.1. **HR-MS** (+ p APCI) *m/z*: [M+H]<sup>+</sup> Calcd for C<sub>25</sub>H<sub>34</sub>NO<sub>3</sub>S<sup>+</sup>: 428.2254; *found*: 428.2251.

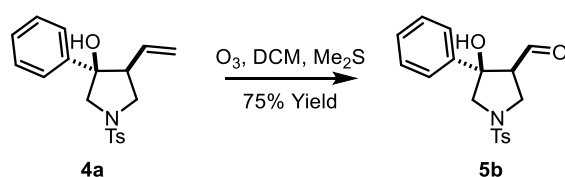

**4a** (34.3 mg, 0.1 mmol) was dissolved in CH<sub>2</sub>Cl<sub>2</sub> (2 mL) and cooled to -78 °C. Ozone was bubbled then directly in the solution. After the reaction showed a blue color, the vial was degassed with N<sub>2</sub> until disappearance of the blue color occurred. After reductive work up with Me<sub>2</sub>S (1 mL), the mixture was allowed to warm to room

temperature and the volatiles removed under reduced pressure. The crude product was purified by flash column silica gel chromatography (2:1 *n*-pentane/EtOAc) provided **5b** as colorless oil (25.9 mg, 75%).

R<sub>f</sub> (3:1 *n*-pentane/ EtOAc) = 0.3.

#### 4-hydroxy-4-phenyl-1-tosylpyrrolidine-3-carbaldehyde

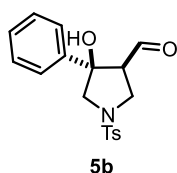

**<sup>1</sup>H NMR** (500 MHz, C<sub>6</sub>D<sub>6</sub>) δ 9.10 (d, *J* = 0.5 Hz, 1H), 7.76-7.71 (m, 2H), 7.13-7.05 (m, 4H), 7.04-7.00 (m, 1H), 6.89-6.85 (m, 2H), 3.91 (t, *J* = 9.5 Hz, 1H), 3.53 (dd, *J* = 10.0, 8.5 Hz, 1H), 3.49 (d, *J* = 11.5 Hz, 1H), 3.41 (d, *J* = 11.0 Hz, 1H), 2.85 (br, 1H), 2.70-2.65 (m, 1H), 1.92 (brs, 3H); **<sup>13</sup>C NMR** (126 MHz, C<sub>6</sub>D<sub>6</sub>) δ 197.8, 143.6, 140.6, 134.6, 129.9, 128.8, 128.3, 128.1, 125.5, 81.4, 63.1, 60.2, 46.7, 21.1. **HR-MS** (+ *p* APCI) *m/z*: [M+H]<sup>+</sup> Calcd for C<sub>18</sub>H<sub>19</sub>NNaO<sub>4</sub>S<sup>+</sup>: 368.0927; *found*: 368.0932.

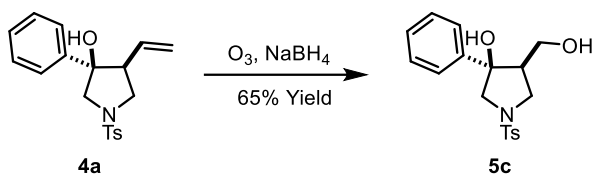

**4a** (34.3 mg, 0.1 mmol) was dissolved in CH<sub>2</sub>Cl<sub>2</sub> (2 mL) and cooled to -78 °C. Ozone was bubbled then directly in the solution. After the reaction showed a blue color, the vial was degassed with N<sub>2</sub> until disappearance of the blue color occurred. To the reaction mixture was further added methanol (2 mL) and NaBH<sub>4</sub> (22.7 mg, 0.6 mmol, 6 equiv.) at 0 °C, warmed to room temperature, stirred for 2 h and quenched by 1M HCl. The aqueous phase was extracted with Et<sub>2</sub>O (3 x 5 mL) and the combined organic phases were dried over Na<sub>2</sub>SO<sub>4</sub> and concentrated under reducer pressure. The crude product was purified by flash column silica gel chromatography (1:1 *n*-pentane/EtOAc) provided **5c** as white solid (22.7 mg, 65%). R<sub>f</sub> (1:1 *n*-pentane/ EtOAc) = 0.3. **m.p.** = 93 °C.

#### 4-(hydroxymethyl)-3-phenyl-1-tosylpyrrolidin-3-ol

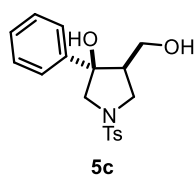

**<sup>1</sup>H NMR** (500 MHz, C<sub>6</sub>D<sub>6</sub>) δ 7.89-7.85 (m, 2H), 7.23-7.18 (m, 2H), 7.12-7.07 (m, 2H), 7.05-7.00 (m, 1H), 6.92-6.87 (m, 2H), 4.34-4.24 (m, 1H), 3.87-3.80 (m, 1H), 3.76-3.70 (m, 1H), 3.64 (dd, *J* = 11.0, 1.5 Hz, 1H), 3.54 (d, *J* = 11.0 Hz, 1H), 3.35-3.20 (m, 2H), 2.60-2.33 (m, 1H), 2.03-1.95 (m, 1H), 1.90 (s, 3H); **<sup>13</sup>C NMR** (126 MHz, C<sub>6</sub>D<sub>6</sub>) δ 143.2, 141.7, 134.9, 129.8, 128.5, 128.1, 127.5, 125.7, 82.5, 63.4, 58.7, 49.7, 48.8, 21.2. **HR-MS** (- p ESI) *m/z*: [M-H]<sup>-</sup> Calcd for C<sub>18</sub>H<sub>20</sub>NO<sub>4</sub>S: 346.1119; *found*: 346.1117.

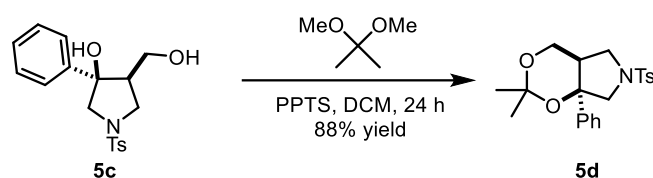

To a solution of **5c** (17.4 mg, 0.05 mmol) in DCM (2 mL) were added 2,2-dimethoxypropane (32 μL, 0.25 mmol) and PPTS (1.2 mg, 10 % mmol) at 0 °C, and the mixture was stirred at room temperature for 2.5 h. To the mixture was added saturated NH<sub>4</sub>Cl solution at 0 °C, and the aqueous layer was extracted with EtOAc. The organic layer was washed with brine (10 mL). The combined organic layer was dried over MgSO<sub>4</sub> and concentrated. The crude product was purified by flash column silica gel chromatography (5:1 *n*-pentane/EtOAc) provided **5d** as colorless oil (17.0 mg, 88%). *R<sub>f</sub>* (10:1 *n*-pentane/EtOAc) = 0.3.

#### 7a-phenyl-6-tosylhexahydro-[1,3]dioxino[4,5-c]pyrrole

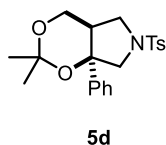

**<sup>1</sup>H NMR** (500 MHz, C<sub>6</sub>D<sub>6</sub>) δ 7.91-7.87 (m, 2H), 7.06-7.00 (m, 3H), 6.95-6.90 (m, 2H), 6.87-6.83 (m, 2H), 3.87 (dd, *J* = 10.5, 9.0 Hz, 1H), 3.81 (d, *J* = 11.5 Hz, 1H), 3.63-3.54 (m, 2H), 3.18 (d, *J* = 11.5 Hz, 1H), 3.17-3.12 (m, 1H), 2.16-2.08 (m, 1H), 1.91 (s, 3H), 0.92 (s, 3H), 0.61 (s, 3H). **<sup>13</sup>C NMR** (126 MHz, C<sub>6</sub>D<sub>6</sub>)

$\delta$  142.6, 141.4, 135.9, 129.5, 128.7, 128.3, 128.3, 125.6, 98.9, 80.0, 64.7, 56.0, 49.1, 36.5, 30.2, 22.9,  
21.0. **HR-MS** (+ p ESI) *m/z*: [M+Na]<sup>+</sup> Calcd for C<sub>21</sub>H<sub>25</sub>NNaO<sub>4</sub>S<sup>+</sup>: 410.1397; *found*: 410.1399.

## Mechanistic studies

### On/Off studies

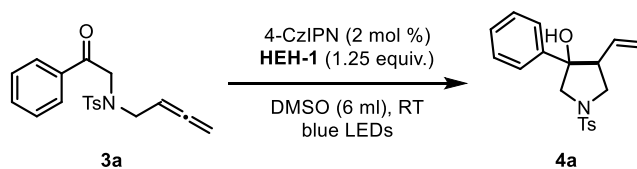

Following the general procedure **GP6**. To an oven-dried Schlenk-tube equipped with magnetic stirring was charged with **3a** (68.3 mg, 0.2 mmol, 1.0 equiv.), Hantzsch-ester **HEH-1** (63mg, 0.25 mmol, 1.25 equiv.), 4-CzIPN (3.2 mg, 2 mol %) and 1,3,5-trimethoxybenzene (11.2 mg, 0.06 mmol, 33 mol %). The Schlenk tube was put on vacuum and backfilled with argon three times. DMSO- $d_6$  (6 mL) was added by syringe under a flow of argon. After stirring for a minute, the resulting pale-yellow solution (0.6 ml) was transferred to NMR tube by syringe under a flow of argon. The NMR tube was sealed by a screw cap and the resulting mixture was placed approximately 2.5 cm away from one 34 W blue LEDs and irradiated and stirred at room temperature. For each indicated time the yield of product (**4a**) was monitored by  $^1\text{H}$  NMR.

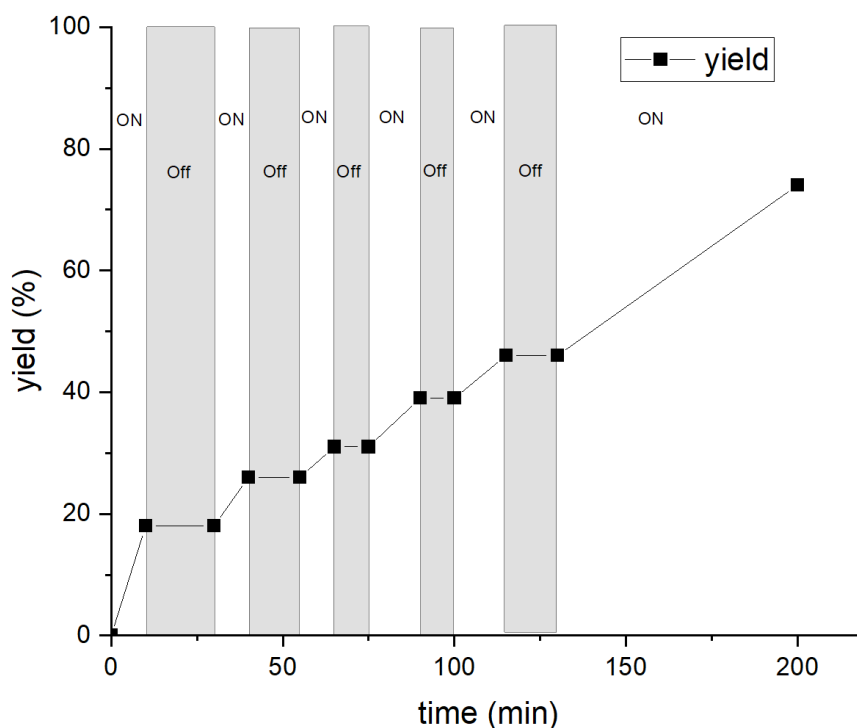

**Figure S2.** Monitor the formation of **4a** with light on/off.

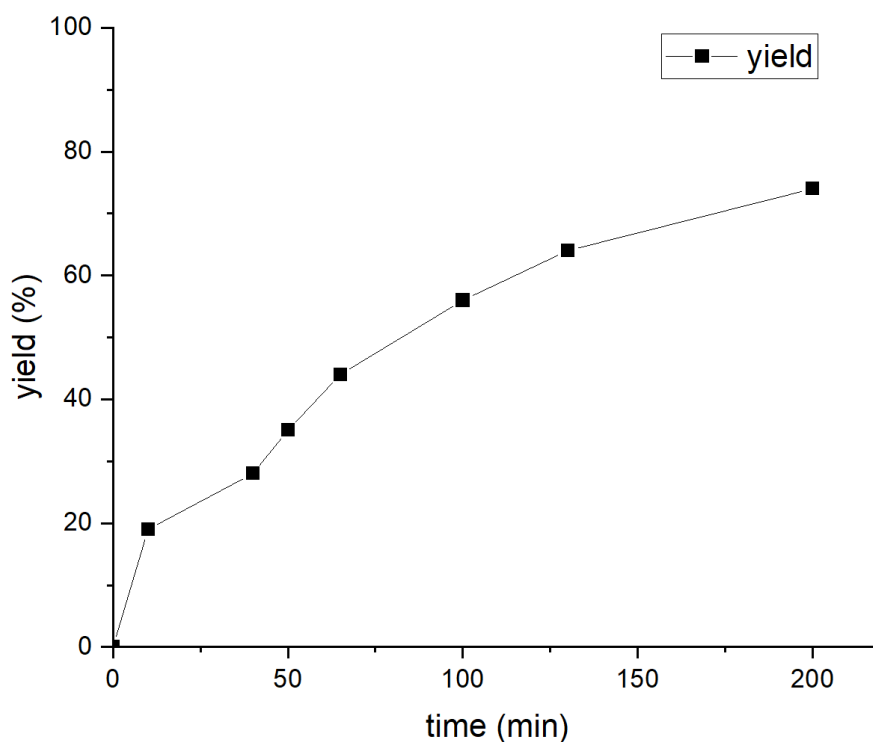

**Figure S3.** Monitor the formation of **4a** under continuous irradiation

### The acid and base doping experiments

Following the general procedure **GP5**. To an oven-dried Schlenk-tube equipped with magnetic stirring was charged with **2a** (65.4 mg, 0.2 mmol, 1.0 equiv.), Hantzsch-ester **HEH-1** (63.6mg, 0.25 mmol, 1.25 equiv.), 4-CzIPN (3.4 mg, 2 mol %), diphenyl phosphate (25.0 mg, 0.10 mmol, 0.5 equiv.) or pyridinium 4-toluenesulfonate (PPTS) (25.1 mg, 0.10 mmol, 0.5 equiv.) or sodium acetate (NaOAc) (8.2 mg, 0.10 mmol, 0.5 equiv.), and 1,3,5-trimethoxybenzene (11.2 mg, 0.06 mmol, 33 mol %). The Schlenk tube was put on vacuum and backfilled with argon three times. DMF- $d_7$  (4 mL) was added by syringe under a flow of argon. After stirring for a minute, the resulting pale-yellow solution (0.6 mL) was transferred to NMR tube by syringe under a flow of argon. The NMR tube was sealed by a screw cap and the resulting mixture was placed approximately 2.5 cm away from one 34 W blue LEDs and irradiated and stirred at room temperature. For each indicated time the yield of product (**2a**) was monitored by  $^1\text{H}$  NMR.

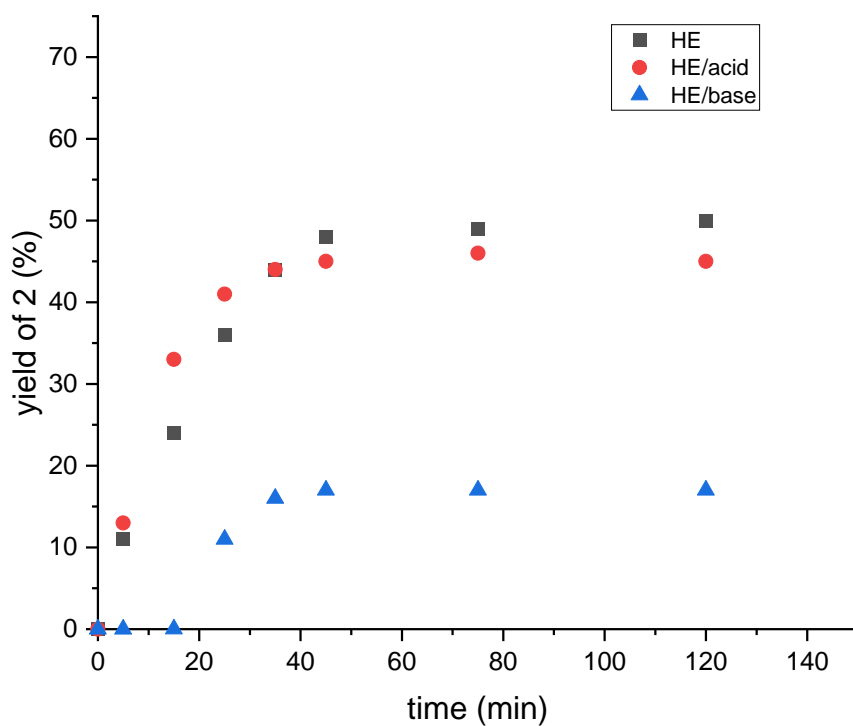

**Figure S4.** Monitor the formation of **2a** with HE or HE/diphenyl phosphate or HE/NaOAc

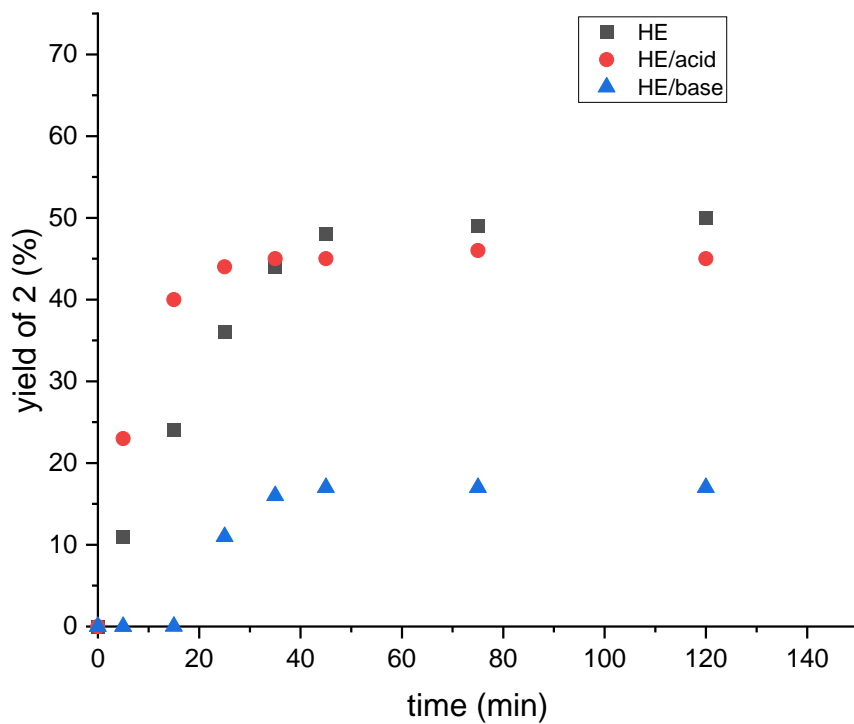

**Figure S5.** Monitor the formation of **2a** with HE or HE/PPTS or HE/NaOAc

## Quantum yield measurements

### Determination of the light intensity of the blue LEDs

The photon flux of blue LEDs was determined by standard ferrioxalate actinometry.<sup>[11]</sup>

$$\text{photo flux (Einstein} \cdot \text{s}^{-1}) = 1.03 \times 10^{-6}$$

### Measurement of quantum yield:

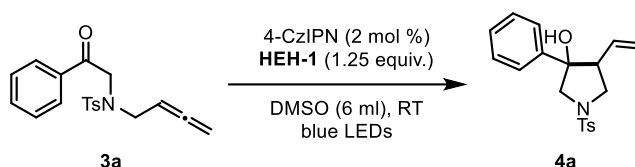

To an oven-dried Schlenk-tube equipped with magnetic stirring was charged with **3** (0.2 mmol), Hantzsch-ester **HEH-1** (63mg, 0.25 mmol, 1.25 equiv.) and 4-CzIPN (3.2 mg, 2 mol %). The Schlenk tube was put on vacuum and backfilled with argon three times. DMSO (6 mL) was added and The Schlenk tube was sealed by a screw cap and the resulting mixture was placed approximately 2.5 cm away from one 34 W blue LEDs and irradiated and stirred for 30 min at room temperature. Then poured into water (40 mL), The organic layer was separated and the aqueous layer was extracted with EtOAc (3 x 15 mL). The combined organic layer was washed with brine (3 x 40 mL) and then dried over Na<sub>2</sub>SO<sub>4</sub>. The solvent was removed under reduced pressure and residue was purified with column chromatography on silica gel afford the corresponding product after drying in vacuo. The product (**4a**) was obtained with 17.8 mg (52.0 μmol). The quantum yield calculation is then as following:

$$\Phi = \frac{\text{moles of product}}{\text{moles of absorbed photons}} = \frac{\text{moles of product}}{\text{flux} \cdot t \cdot f}$$

Where flux is the photon flux determined by ferrioxalate actinometry ( $1.03 \times 10^{-6}$  Einstein/s), t is the time (1800 s), and f is the fraction of light absorbed by 4-CzIPN at 450 nm. A  $1 \times 10^{-3}$  M solution of [**PC1**] in DMSO was prepared, and the absorbance of the solution at 450 nm was 2.080. The fraction of light absorbed at 450 nm was calculated:  $f = 1.0000 - 10^{-A} = 1.0000 - 10^{-2.080} = 0.99$ .

$$\Phi = \frac{\text{moles of product}}{\text{moles of absorbed photons}} = \frac{\text{moles of product}}{\text{flux} \cdot t \cdot f} = \frac{52.0 \times 10^{-5}}{1.03 \times 10^{-6} \cdot 1800 \cdot 0.99} = 0.28$$



## X-Ray crystal structure of 2l

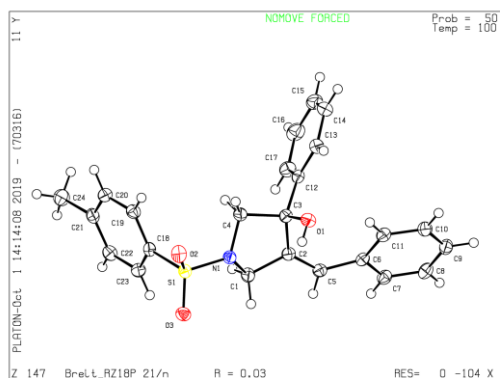

The compound was crystallized from DCM/pentane by solvent layering. The data for Breit\_RZ188FA\_a-finalcif.cif were collected from a shock-cooled single crystal at 100(2) K on a Bruker D8 VENTURE dual wavelength Mo/Cu three-circle diffractometer with a microfocus sealed X-ray tube using mirror optics as monochromator and a Bruker PHOTON III detector. The diffractometer was equipped with an Oxford Cryostream 800 low temperature device and used  $\text{CuK}\alpha$  radiation,  $\lambda = 1.54184 \text{ \AA}$ . All data were integrated with SAINT and a multi-scan absorption correction using SADABS-2016/2 was applied. The structure was solved by direct methods using SHELXT 2014/5 (Sheldrick, 2014) and refined by full-matrix least-squares methods against  $F^2$  by SHELXL-2018/3 (Sheldrick, 2018). All non-hydrogen atoms were refined with anisotropic displacement parameters. The hydrogen atoms were refined isotropically on calculated positions using a riding model with their  $U_{\text{iso}}$  values constrained to 1.5 times the  $U_{\text{eq}}$  of their pivot atoms for terminal  $\text{sp}^3$  carbon atoms and 1.2 times for all other carbon atoms. Crystallographic data (including structure factors) for the structures reported in this paper have been deposited with the Cambridge Crystallographic Data Centre. CCDC 1957120 contain the supplementary crystallographic data for this paper. Copies of the data can be obtained free of charge from The Cambridge Crystallographic Data Centre via [www.ccdc.cam.ac.uk/structures](http://www.ccdc.cam.ac.uk/structures).

**Table S3. Crystal data and structure refinement for Breit\_RZ188FA\_a-finalcif.cif**

|                          |                                                 |
|--------------------------|-------------------------------------------------|
| CCDC number              | 1957120                                         |
| Empirical formula        | $\text{C}_{24}\text{H}_{23}\text{NO}_3\text{S}$ |
| Formula weight           | 405.49                                          |
| Temperature [K]          | 100(2)                                          |
| Crystal system           | monoclinic                                      |
| Space group (number)     | $P2_1/c$ (14)                                   |
| $a$ [Å]                  | 14.9992(11)                                     |
| $b$ [Å]                  | 6.4237(5)                                       |
| $c$ [Å]                  | 21.1674(18)                                     |
| $\alpha$ [Å]             | 90                                              |
| $\beta$ [Å]              | 95.605(4)                                       |
| $\gamma$ [Å]             | 90                                              |
| Volume [Å <sup>3</sup> ] | 2029.7(3)                                       |
| Z                        | 4                                               |

|                                           |                                                                  |
|-------------------------------------------|------------------------------------------------------------------|
| $\rho_{\text{calc}}$ [g/cm <sup>3</sup> ] | 1.327                                                            |
| $\mu$ [mm <sup>-1</sup> ]                 | 1.621                                                            |
| $F(000)$                                  | 856                                                              |
| Crystal size [mm <sup>3</sup> ]           | 0.150×0.050×0.030                                                |
| Crystal colour                            | colourless                                                       |
| Crystal shape                             | needle                                                           |
| Radiation                                 | CuK $\alpha$ ( $\lambda=1.54184$ )                               |
| 2 $\theta$ range [°]                      | 6.92 to 144.98                                                   |
| Index ranges                              | -18 ≤ h ≤ 18<br>-7 ≤ k ≤ 7<br>-25 ≤ l ≤ 26                       |
| Reflections collected                     | 117377                                                           |
| Independent reflections                   | 4007<br>$R_{\text{int}} = 0.0465$<br>$R_{\text{sigma}} = 0.0104$ |
| Completeness to $\theta = 67.684^\circ$   | 100.00                                                           |
| Data / Restraints / Parameters            | 4007/0/266                                                       |
| Goodness-of-fit on $F^2$                  | 1.036                                                            |
| Final $R$ indexes [I ≥ 2 $\sigma$ (I)]    | $R_1 = 0.0295$<br>$wR_2 = 0.0778$                                |
| Final $R$ indexes [all data]              | $R_1 = 0.0326$<br>$wR_2 = 0.0802$                                |
| Largest peak/hole [eÅ <sup>3</sup> ]      | 0.41/-0.42                                                       |
| Extinction coefficient                    | 0.00052(11)                                                      |

## X-Ray crystal structure of 4a-1

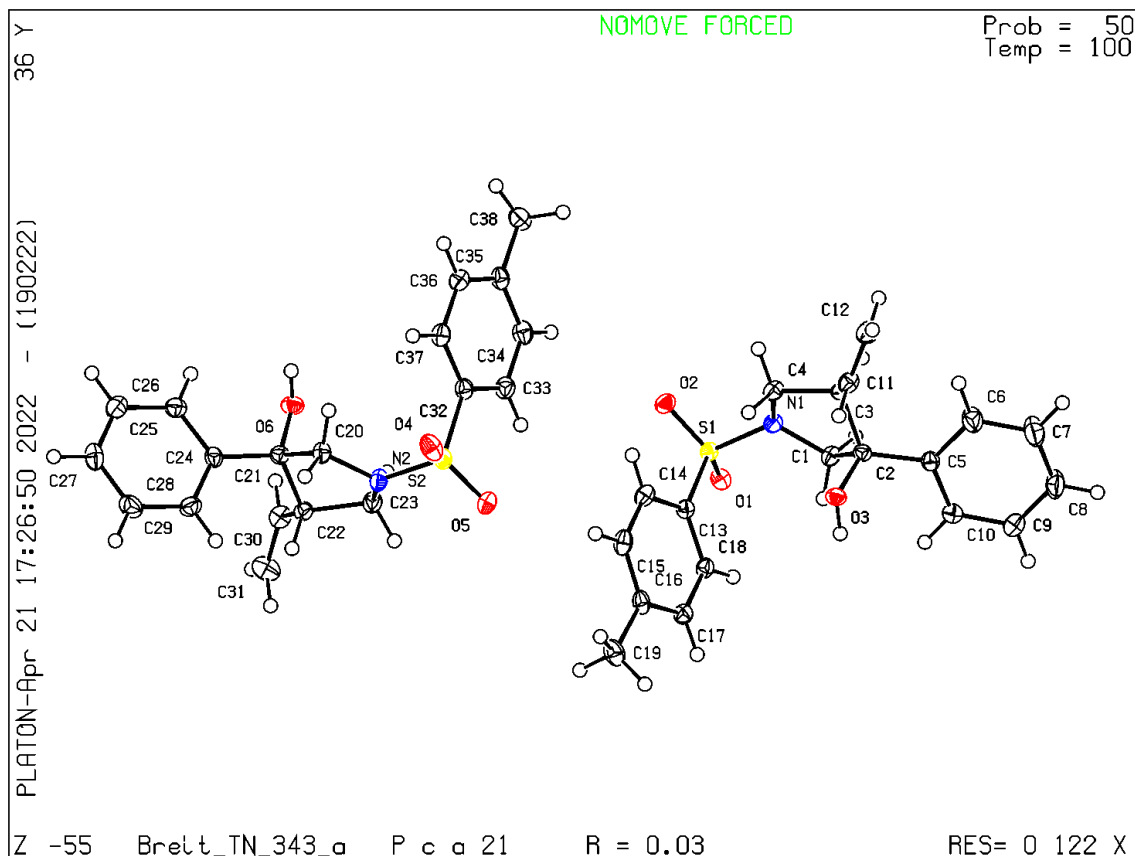

Crystals were obtained at room temperature by slow diffusion of pentane into a solution of the compound dissolved in dichloromethane by the aid of layering. The data for Breit\_TN\_343\_a were collected from a shock-cooled single crystal at 100(2) K on a Bruker D8 VENTURE dual wavelength Mo/Cu three-circle diffractometer with a microfocus sealed X-ray tube using mirror optics as monochromator and a Bruker PHOTON III detector. The diffractometer was equipped with an Oxford Cryostream 800 low temperature device and used MoK $\alpha$  radiation ( $\lambda = 0.71073 \text{ \AA}$ ). All data were integrated with SAINT and a multi-scan absorption correction using SADABS was applied.<sup>[20,21]</sup> The structure were solved by direct methods using SHELXT and refined by full-matrix least-squares methods against  $F^2$  by SHELXL-2018/3.<sup>[22,23]</sup> All non-hydrogen atoms were refined with an isotropic displacement parameters. The hydrogen atoms were refined isotropically on calculated positions using a riding model with their  $U_{iso}$  values constrained to 1.5 times the  $U_{eq}$  of their pivot atoms for terminal  $sp^3$  carbon atoms and 1.2 times for all other carbon atoms.

Crystallographic data for the structures reported in this paper have been deposited with the Cambridge Crystallographic Data Centre.<sup>[24]</sup> CCDC 2167993 contain the supplementary crystallographic data for this paper. These data can be obtained free of charge from The Cambridge Crystallographic Data Centre via [www.ccdc.cam.ac.uk/structures](http://www.ccdc.cam.ac.uk/structures). This report and the CIF file were generated using FinalCif.<sup>[25]</sup>

**Table S4. Crystal data and structure refinement for Breit\_TN\_343\_a**

|                                           |                                                   |
|-------------------------------------------|---------------------------------------------------|
| CCDC number                               | 2167993                                           |
| Empirical formula                         | C <sub>19</sub> H <sub>21</sub> NO <sub>3</sub> S |
| Formula weight                            | 343.43                                            |
| Temperature [K]                           | 100(2)                                            |
| Crystal system                            | orthorhombic                                      |
| Space group (number)                      | <i>Pca</i> 2 <sub>1</sub> (29)                    |
| <i>a</i> [Å]                              | 20.050(4)                                         |
| <i>b</i> [Å]                              | 16.600(3)                                         |
| <i>c</i> [Å]                              | 10.280(2)                                         |
| $\alpha$ [°]                              | 90                                                |
| $\beta$ [°]                               | 90                                                |
| $\gamma$ [°]                              | 90                                                |
| Volume [Å <sup>3</sup> ]                  | 3421.4(11)                                        |
| <i>Z</i>                                  | 8                                                 |
| $\rho_{\text{calc}}$ [gcm <sup>-3</sup> ] | 1.333                                             |
| $\mu$ [mm <sup>-1</sup> ]                 | 0.206                                             |
| <i>F</i> (000)                            | 1456                                              |
| Crystal size [mm <sup>3</sup> ]           | 0.338×0.301×0.054                                 |
| Crystal colour                            | colourless                                        |
| Crystal shape                             | plate                                             |
| Radiation                                 | MoK $\alpha$ ( $\lambda$ =0.71073 Å)              |
| 2 $\theta$ range [°]                      | 3.19 to 61.10 (0.70 Å)                            |
| Index ranges                              | -28 ≤ <i>h</i> ≤ 28<br>-23 ≤ <i>k</i> ≤ 23        |

|                               |                             |
|-------------------------------|-----------------------------|
|                               | -14 ≤ l ≤ 14                |
| Reflections collected         | 228692                      |
| Independent reflections       | 10470                       |
|                               | $R_{\text{int}} = 0.0627$   |
|                               | $R_{\text{sigma}} = 0.0199$ |
| Completeness to               | 100.0 %                     |
| $\Theta = 25.242^\circ$       |                             |
| Data / Restraints /           | 10470/1/439                 |
| Parameters                    |                             |
| Goodness-of-fit on $F^2$      | 1.046                       |
| Final $R$ indexes             | $R_1 = 0.0342$              |
| [ $\geq 2\sigma(I)$ ]         | $wR_2 = 0.0860$             |
| Final $R$ indexes             | $R_1 = 0.0378$              |
| [all data]                    | $wR_2 = 0.0889$             |
| Largest peak/hole             | 0.45/-0.28                  |
| [ $\text{e}\text{\AA}^{-3}$ ] |                             |
| Flack X parameter             | 0.297(11)                   |

## Reference

- [1] H. Uoyama, K. Goushi, K. Shizu, H. Nomura, C. Adachi, *Nature* **2012**, *492*, 234-238.
- [2] G.-W. Wang, J.-J. Xia, C.-B. Miao, X.-L. Wu, *Bull. Chem. Soc. Jpn.* **2006**, *79*, 454-459.
- [3] A. Trowbridge, D. Reich, M. J. Gaunt, *Nature* **2018**, *561*, 522-527.
- [4] J. Zheng, N. Tang, H. Xie, B. Breit, *Angew. Chem. Int. Ed.* **2022**, DOI: 10.1002/anie.202200105.
- [5] K. Shen, X. Han, X. Lu, *Org. Lett.* **2013**, *15*, 1732-1735.
- [6] T. Go, A. Morimatsu, H. Wasada, G. Tanabe, O. Muraoka, Y. Sawada, M. Yoshimatsu, *Beilstein J. Org. Chem.* **2018**, *14*, 2722-2729.
- [7] C. P. Grugel, B. Breit, *Org. Lett.* **2019**, *21*, 9672-9676.
- [8] Claraz, F. Serpier, S. Darses, *ACS Catal.* **2017**, *7*, 3410-3413.
- [9] R. Sanza, T. Nguyen, N. Iqbal, S. Argent, W. Lewis, H. Lam, *Chem. Sci.*, **2020**, *11*, 2401-2406.
- [10] S. S. K. Boominathan, W.-P. Hu, G. C. Senadi, J.-J. Wang, *Adv. Synth. Catal.* **2013**, *355*, 3570-3574.
- [11] G. M. Talybov, *Russ. J. Org. Chem.* **2017**, *53*, 296-298.
- [12] H. Ishizaki, Miyuki; Satoh, Hiroshi; Hoshino, Osamu; Nishitani, Kiyoshi; Hara, *Heterocycles* **2004**, *63*, 827-844.
- [13] D. Padín, F. Cambeiro, M. Fañanás-Mastral, J. A. Varela, C. Saá, *ACS Catal.* **2017**, *7*, 992-996.
- [14] D. Cassú, T. Parella, M. Solà, A. Pla-Quintana, A. Roglans, *Chem. - A Eur. J.* **2017**, *23*, 14889-14899.
- [15] C. Blaszykowski, A.-L. Dhimane, L. Fensterbank, M. Malacria, *Org. Lett.* **2003**, *5*, 1341-1344.
- [16] D. Qian, J. Zhang, *Beilstein J. Org. Chem.* **2011**, *7*, 808-812.
- [17] W. Song, J. C. Lynch, X. Shu, W. Tang, *Adv. Synth. Catal.* **2016**, *358*, 2007-2011.
- [18] D. J. Lippincott, R. T. H. Linstadt, M. R. Maser, B. H. Lipshutz, *Angew. Chem. Int. Ed.* **2017**, *56*, 847-850.
- [19] J. Zheng, B. Breit, *Angew. Chem., Int. Ed.* **2019**, *58*, 3392-3397.
- [20] Bruker, *SAINT, V8.40B*, Bruker AXS Inc., Madison, Wisconsin, USA.
- [21] L. Krause, R. Herbst-Irmer, G. M. Sheldrick, D. Stalke, *J. Appl. Cryst.* **2015**, *48*, 3-10.
- [22] G. M. Sheldrick, *Acta Cryst.* **2015**, *A71*, 3-8.
- [23] G. M. Sheldrick, *Acta Cryst.* **2015**, *C71*, 3-8.
- [24] C. R. Groom, I. J. Bruno, M. P. Lightfoot, S. C. Ward, *Acta Cryst.* **2016**, *B72*, 171-179.
- [25] D. Kratzert, *FinalCif, V104*, <https://dkratzert.de/finalcif.html>.

# $^1\text{H}$ , $^{13}\text{C}$ , $^{19}\text{F}$ NMR spectra

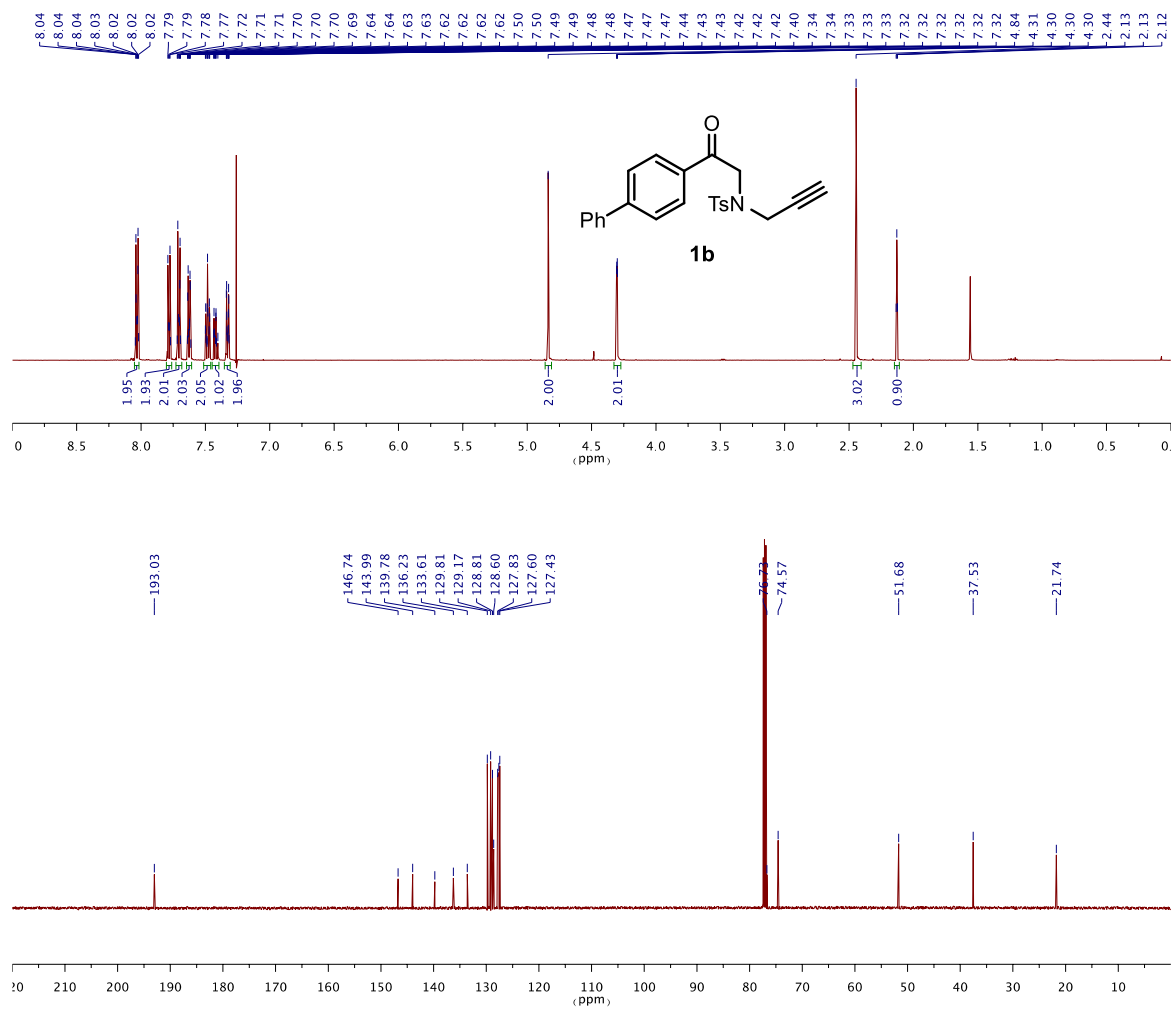

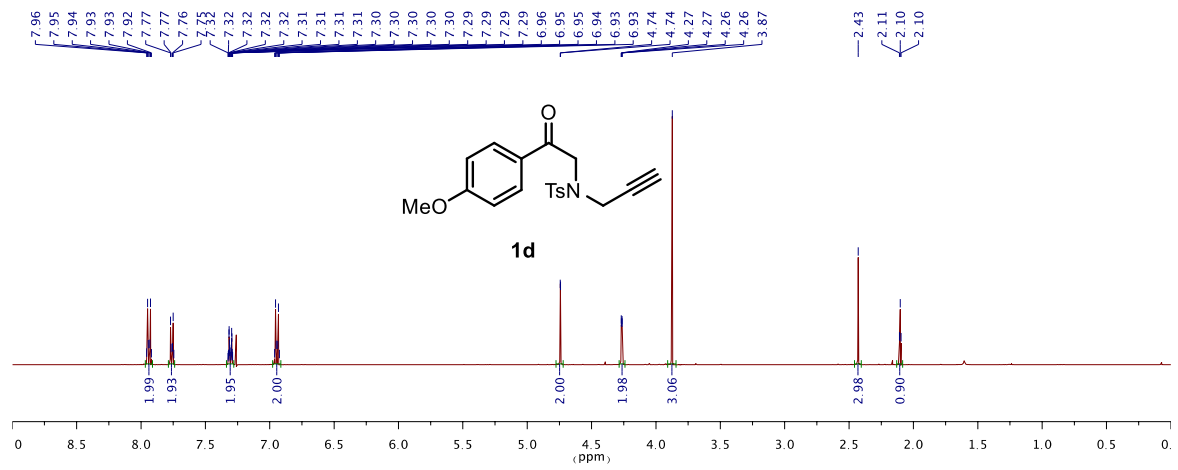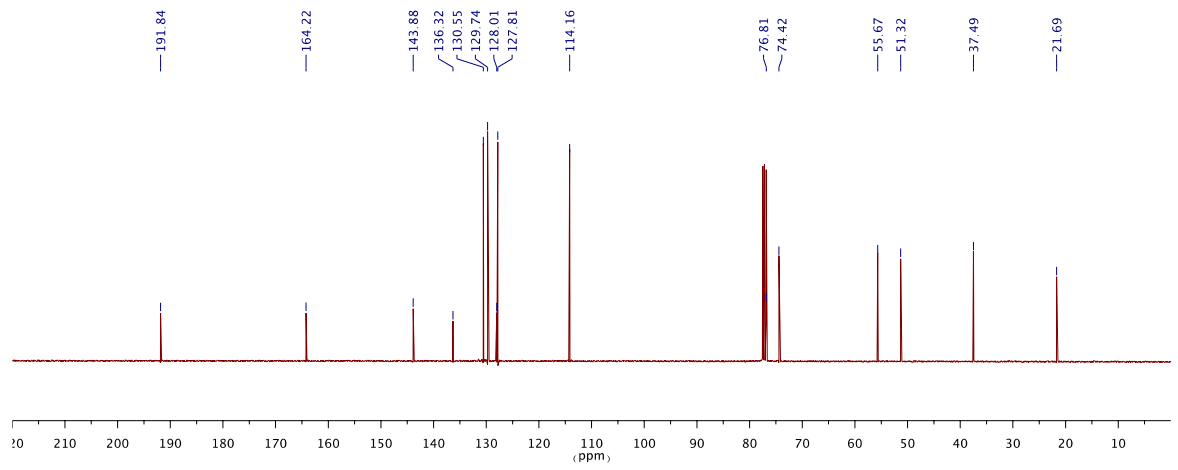



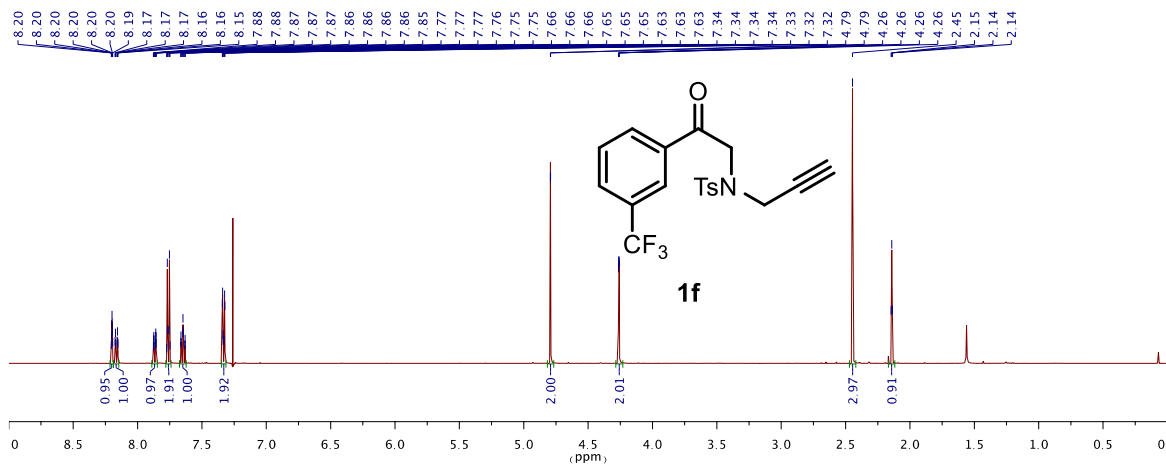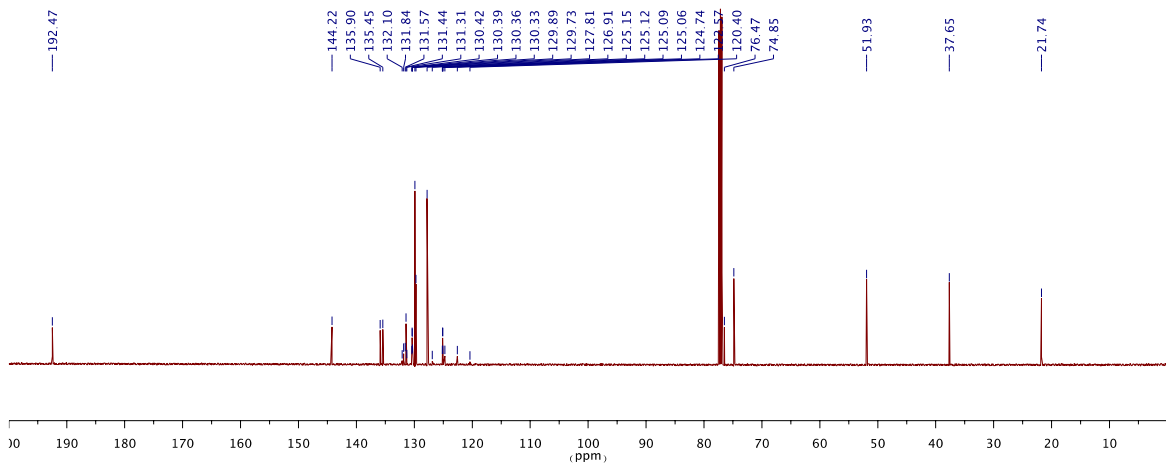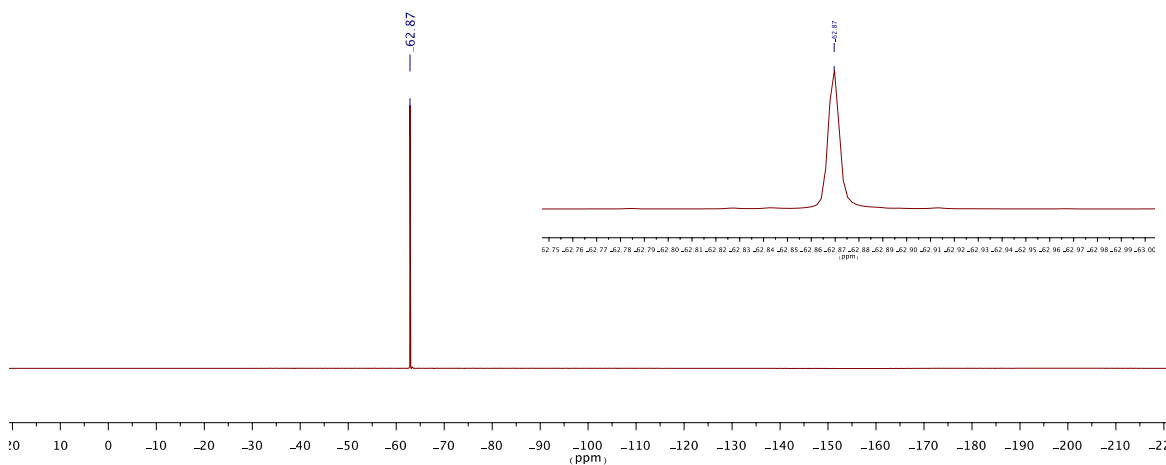





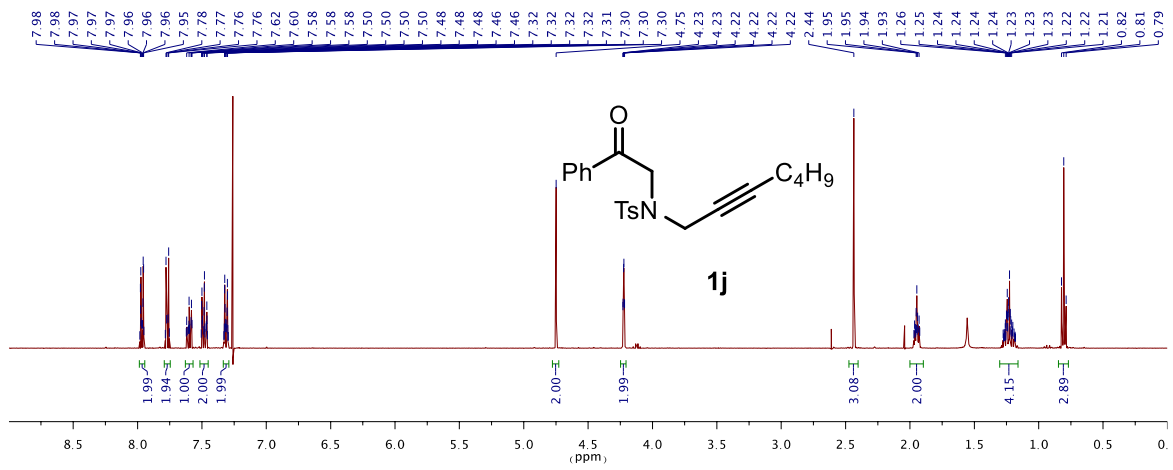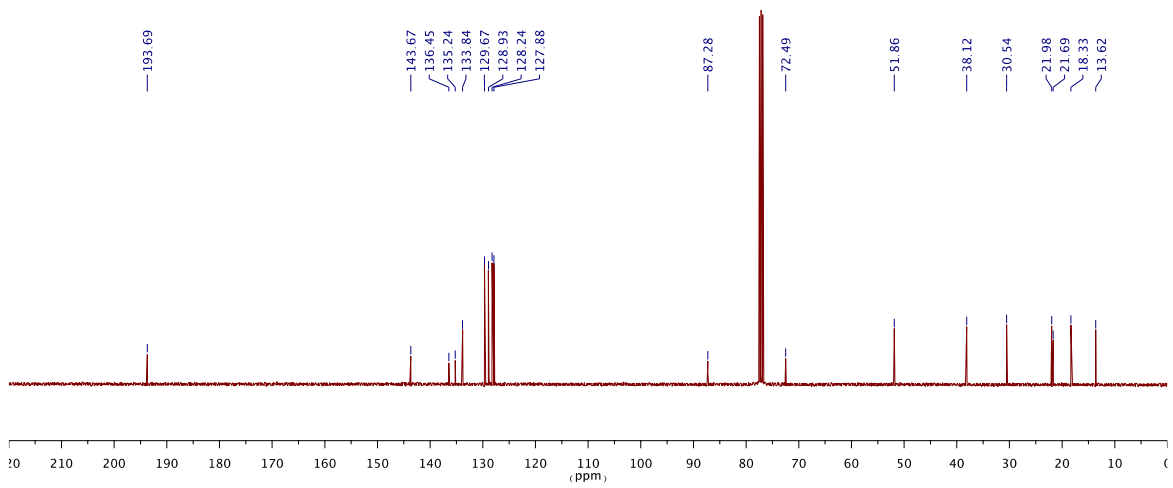

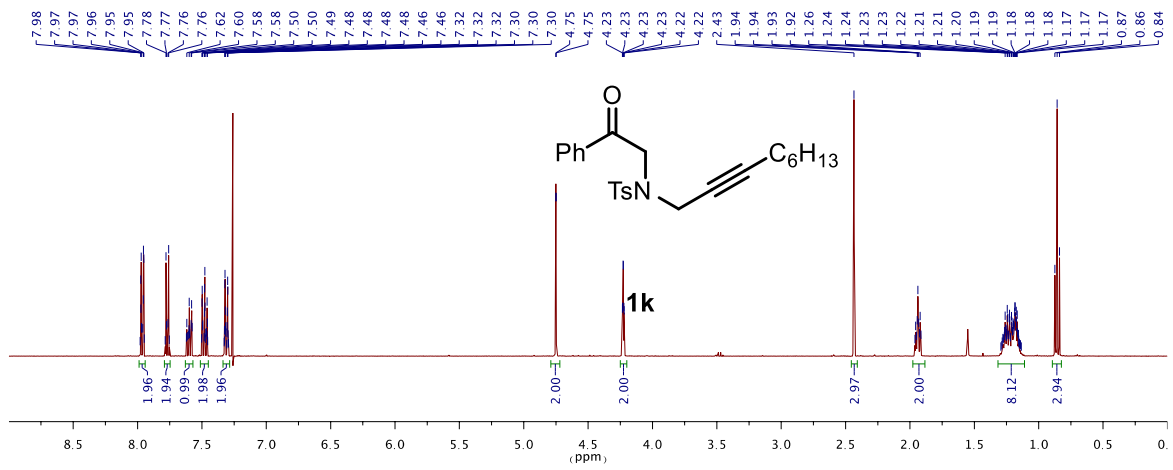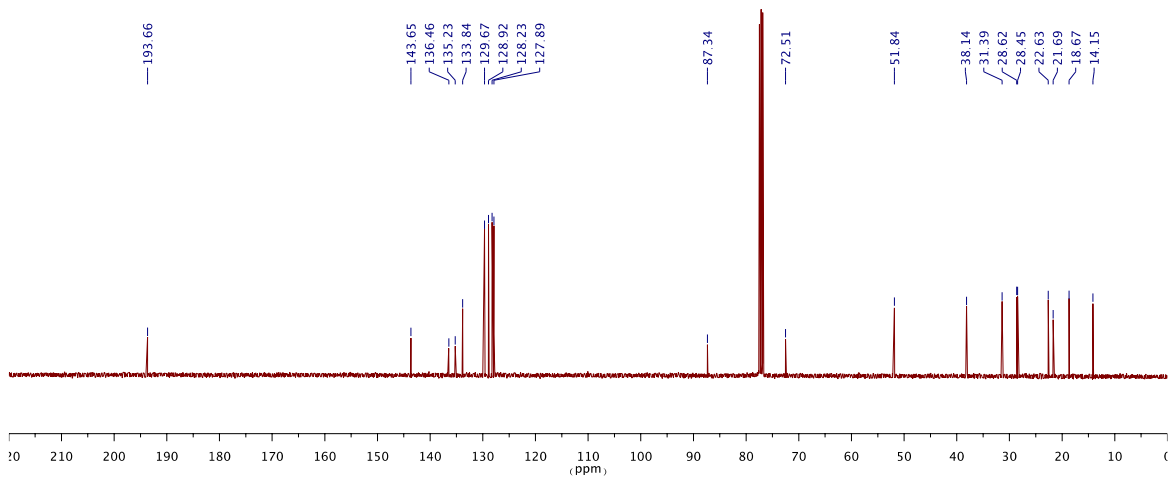

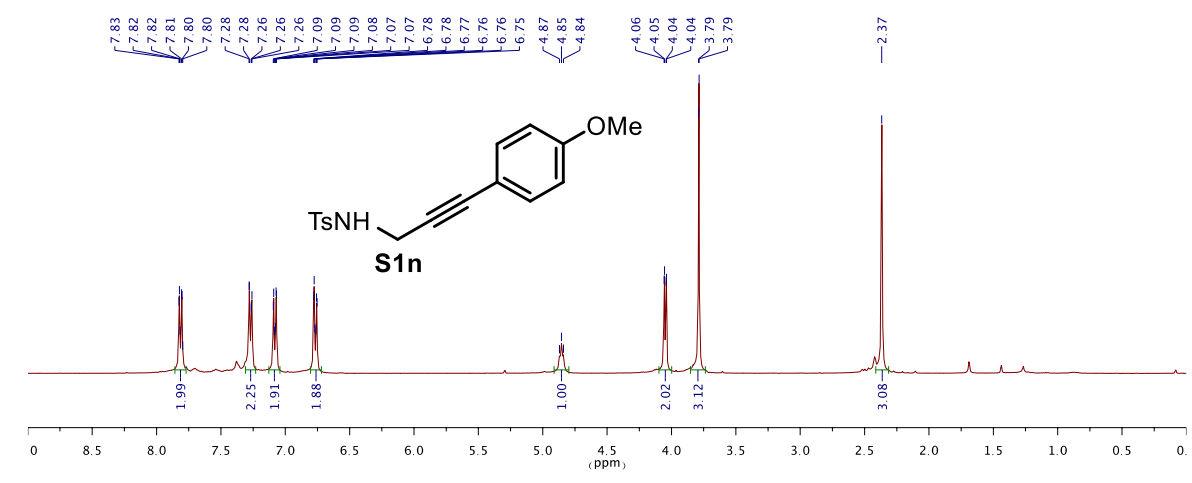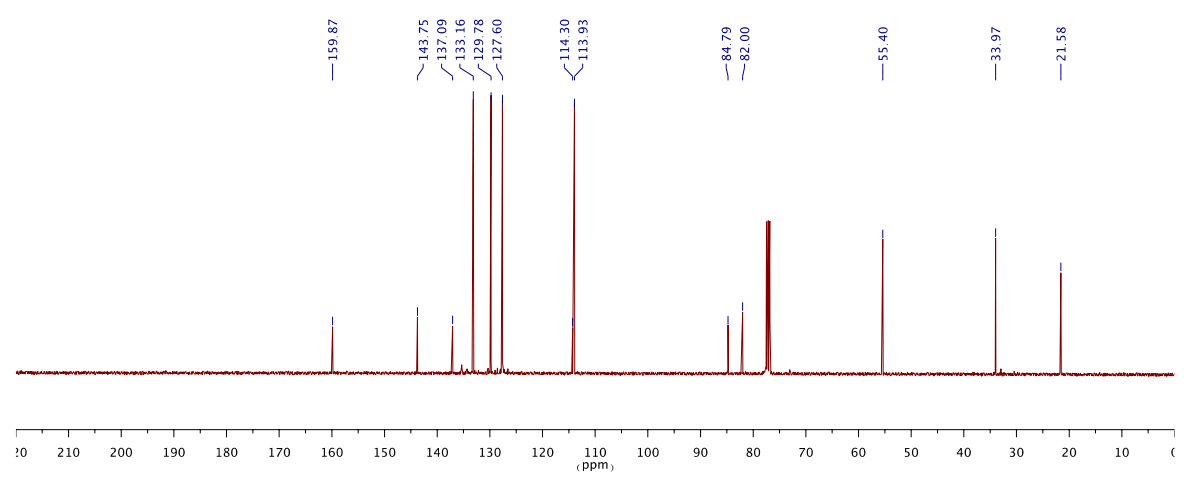

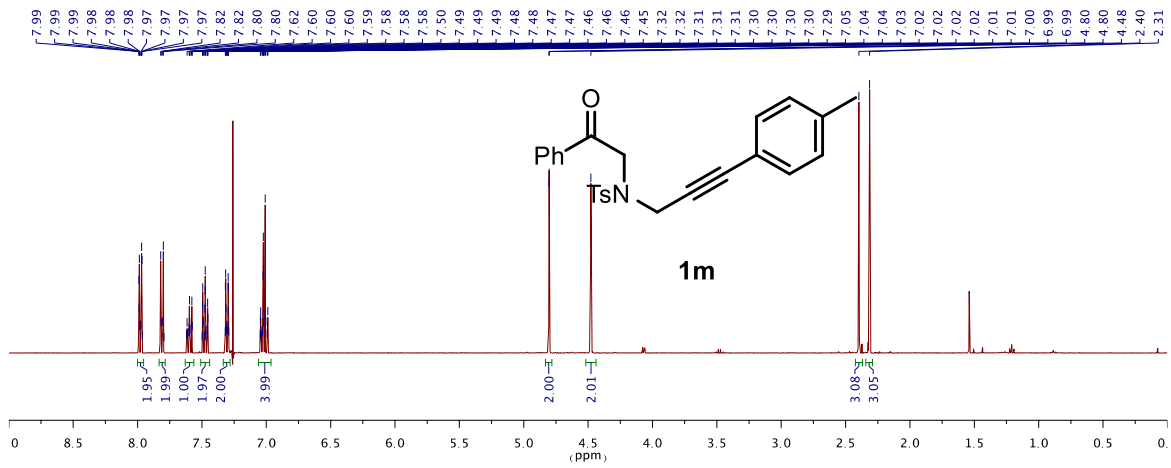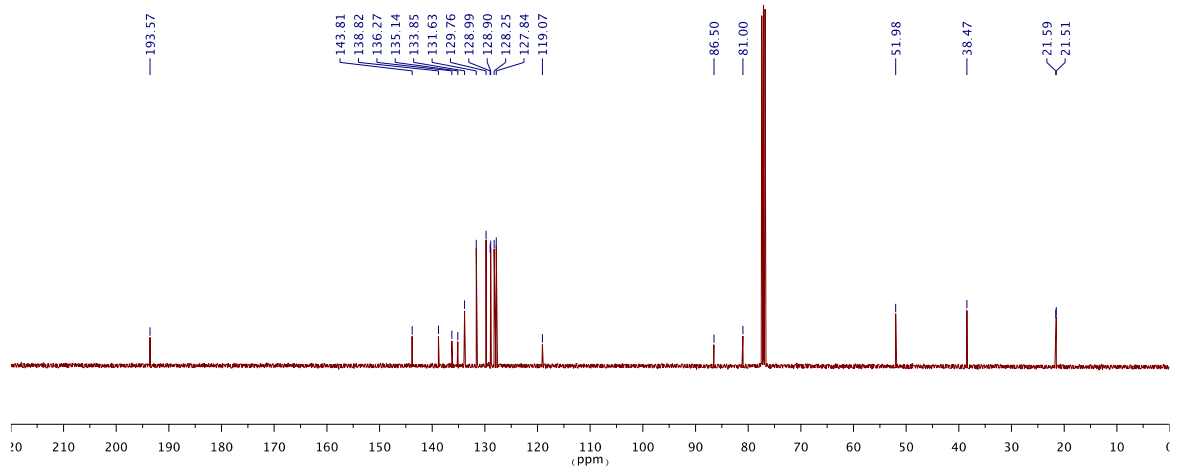

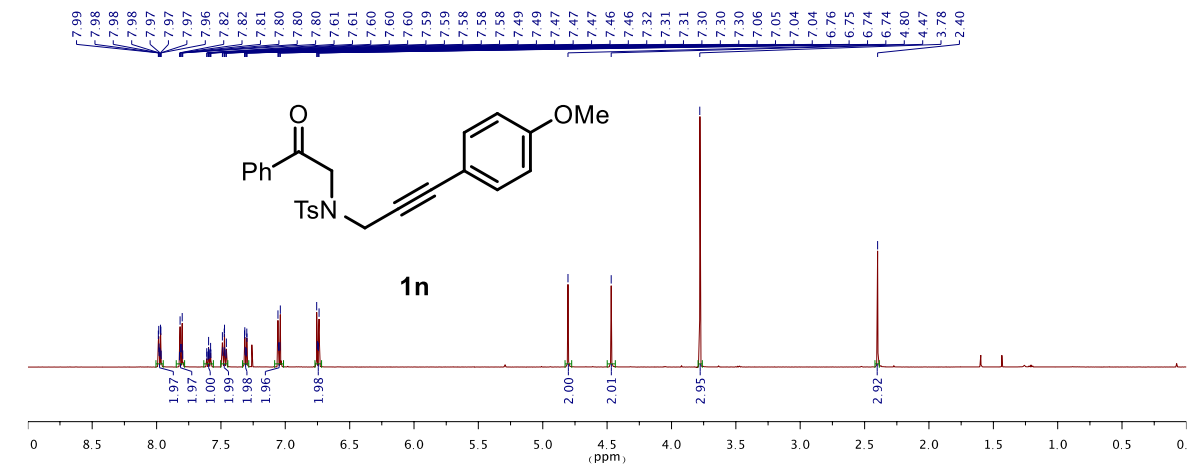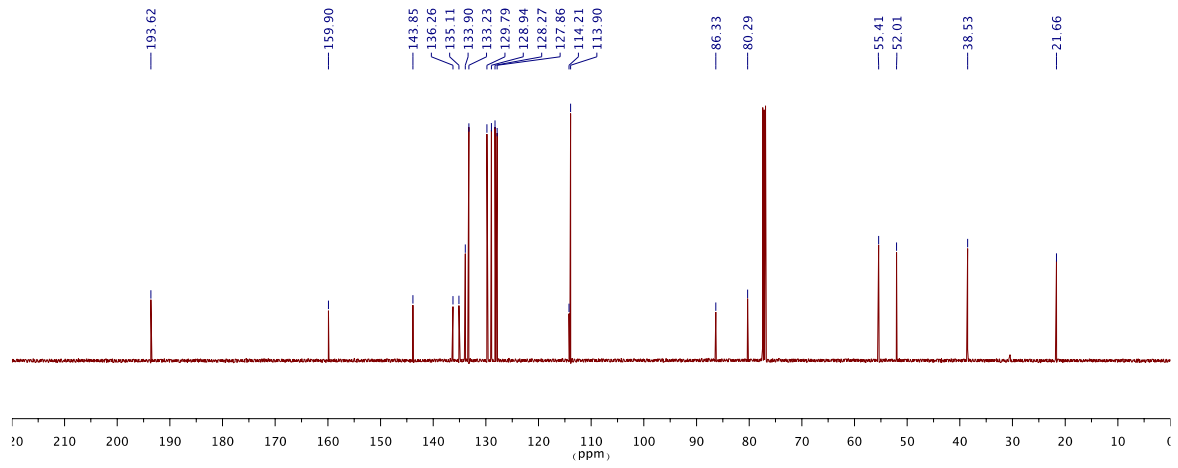



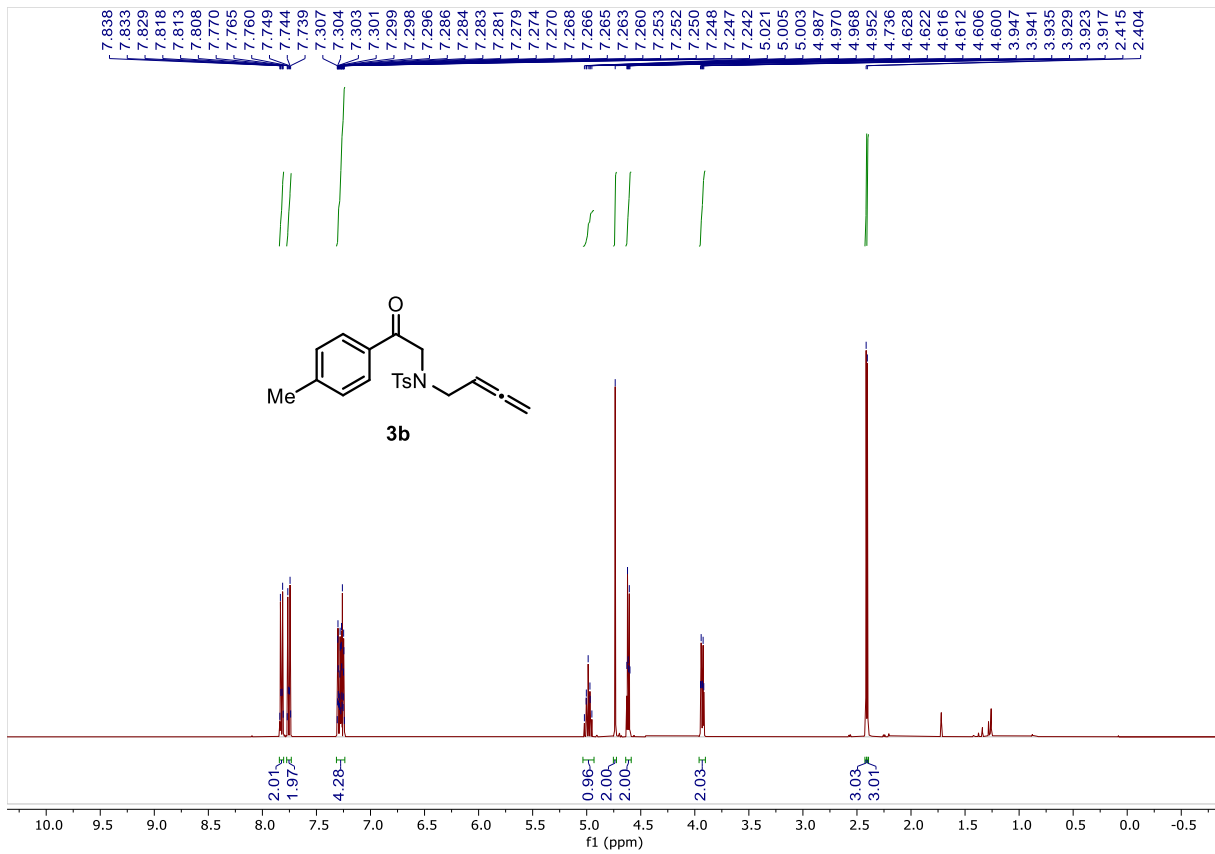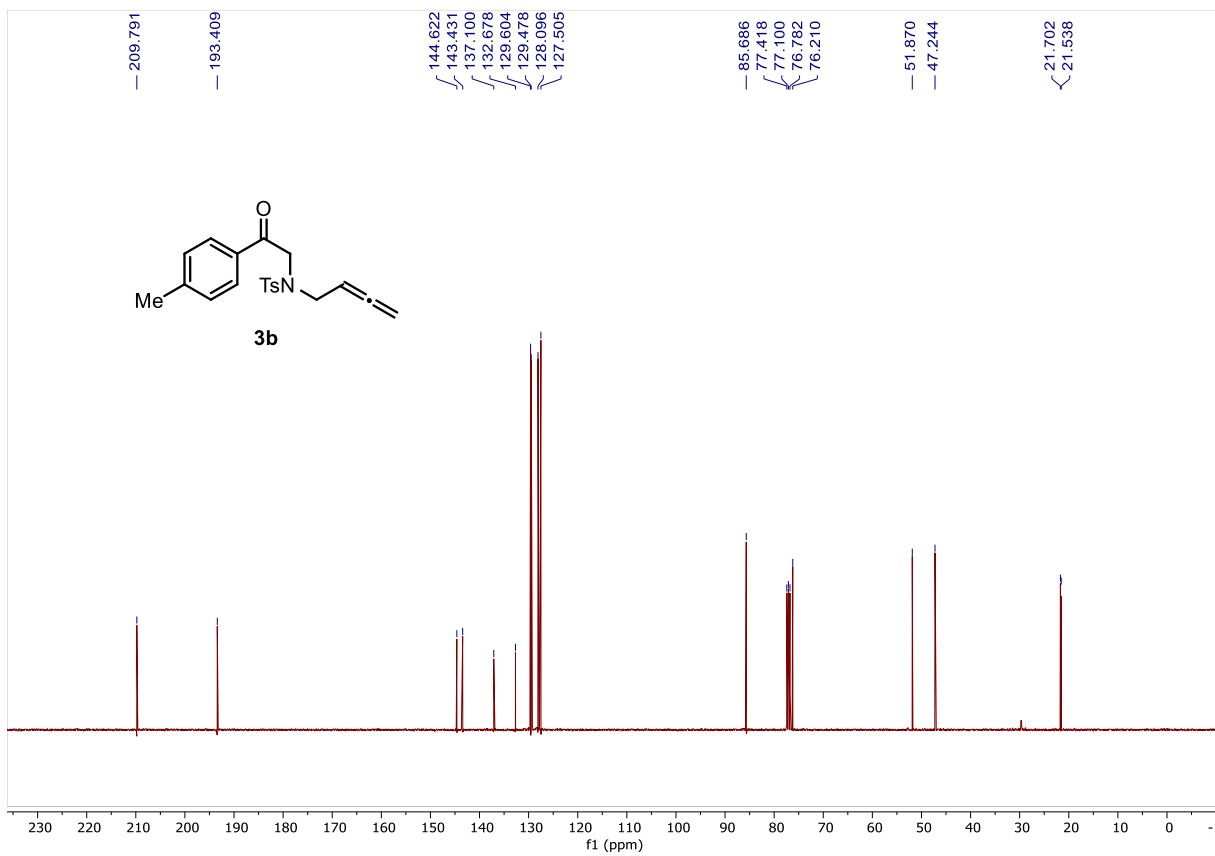

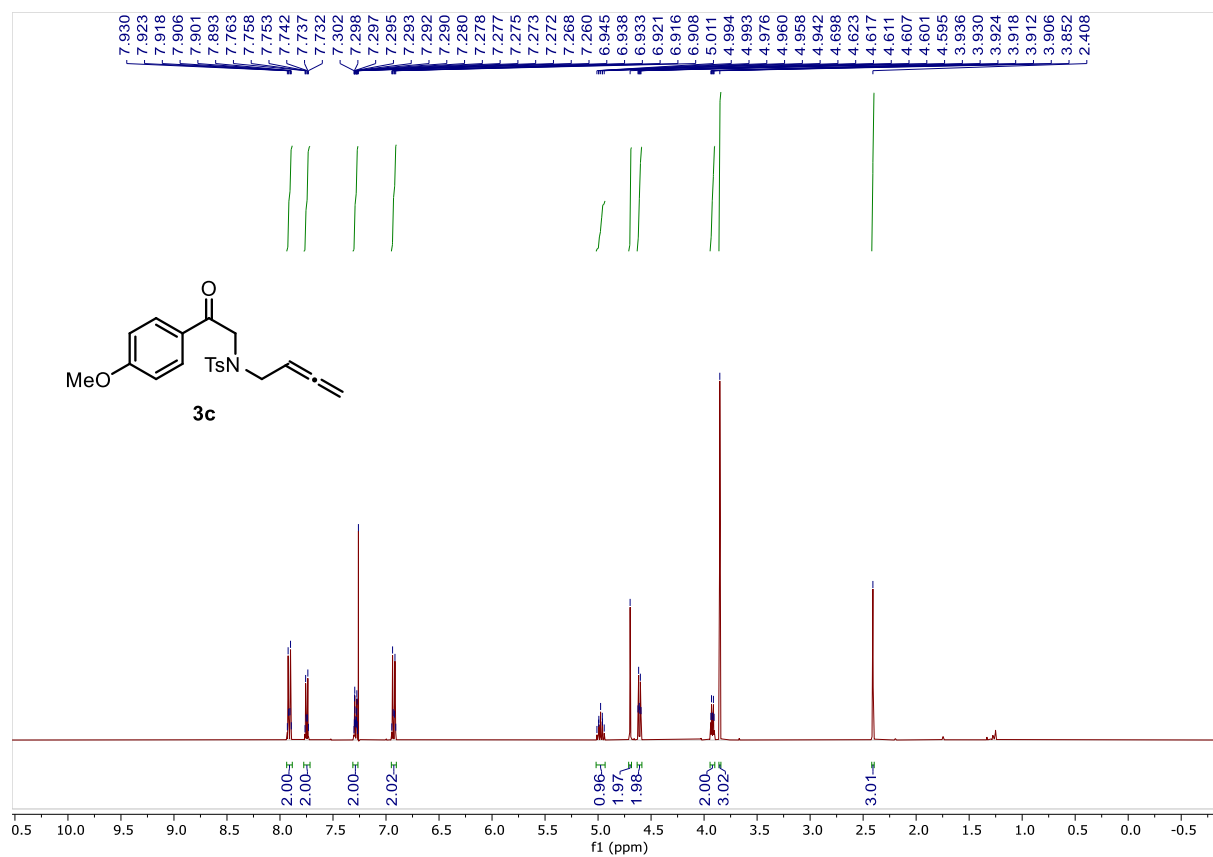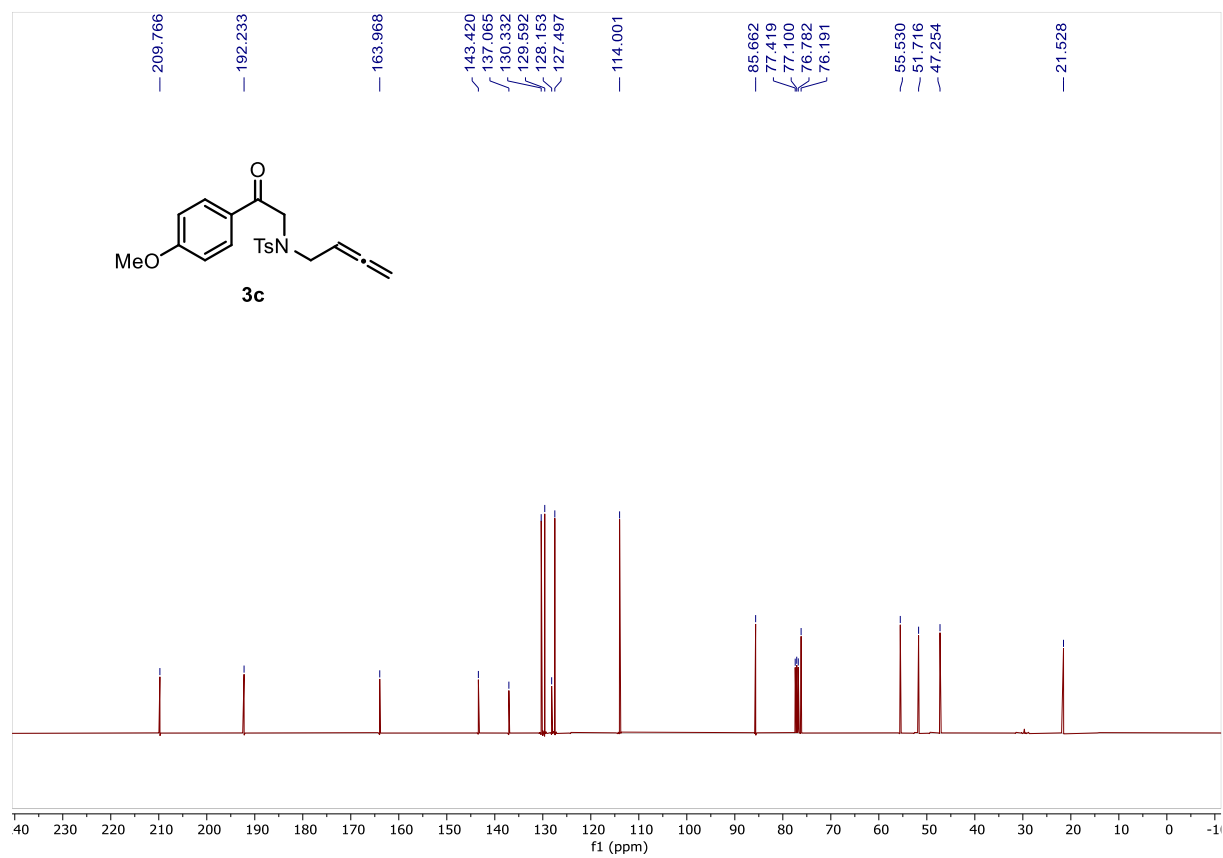

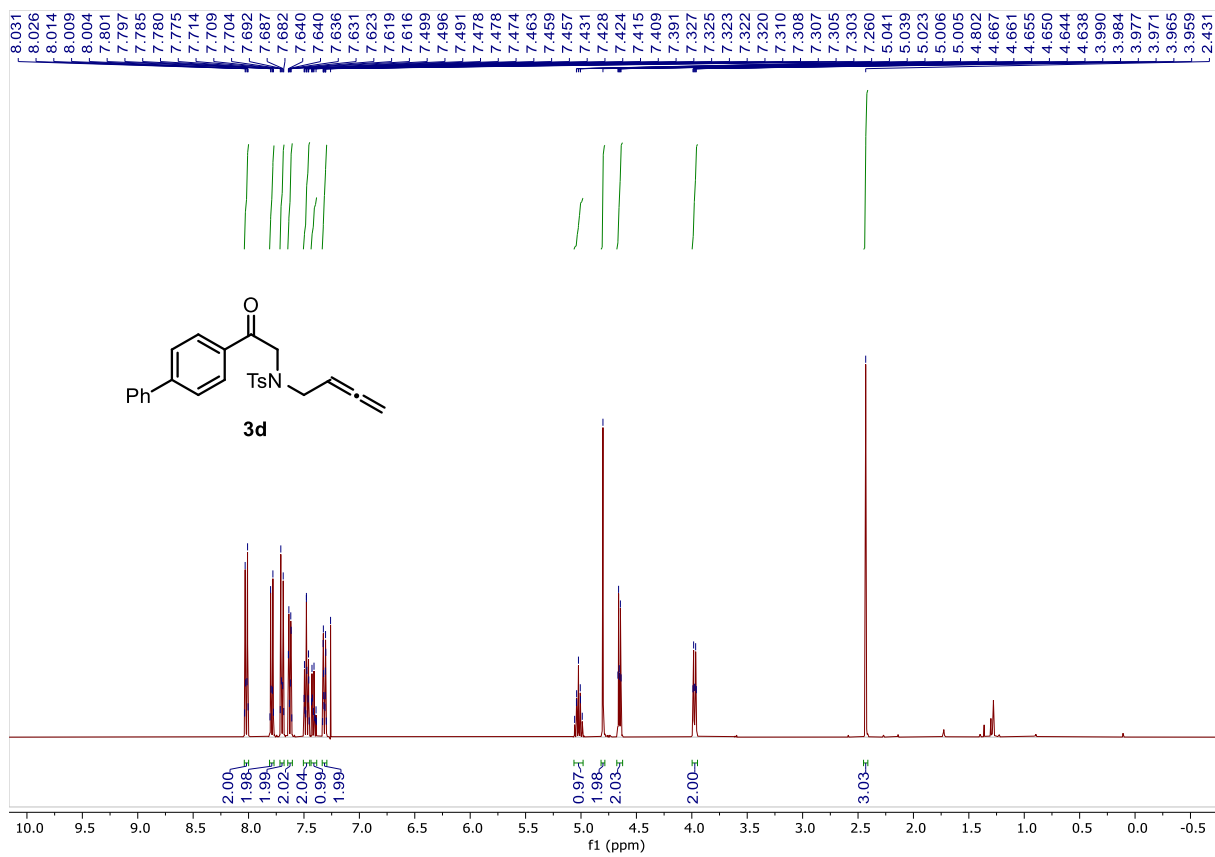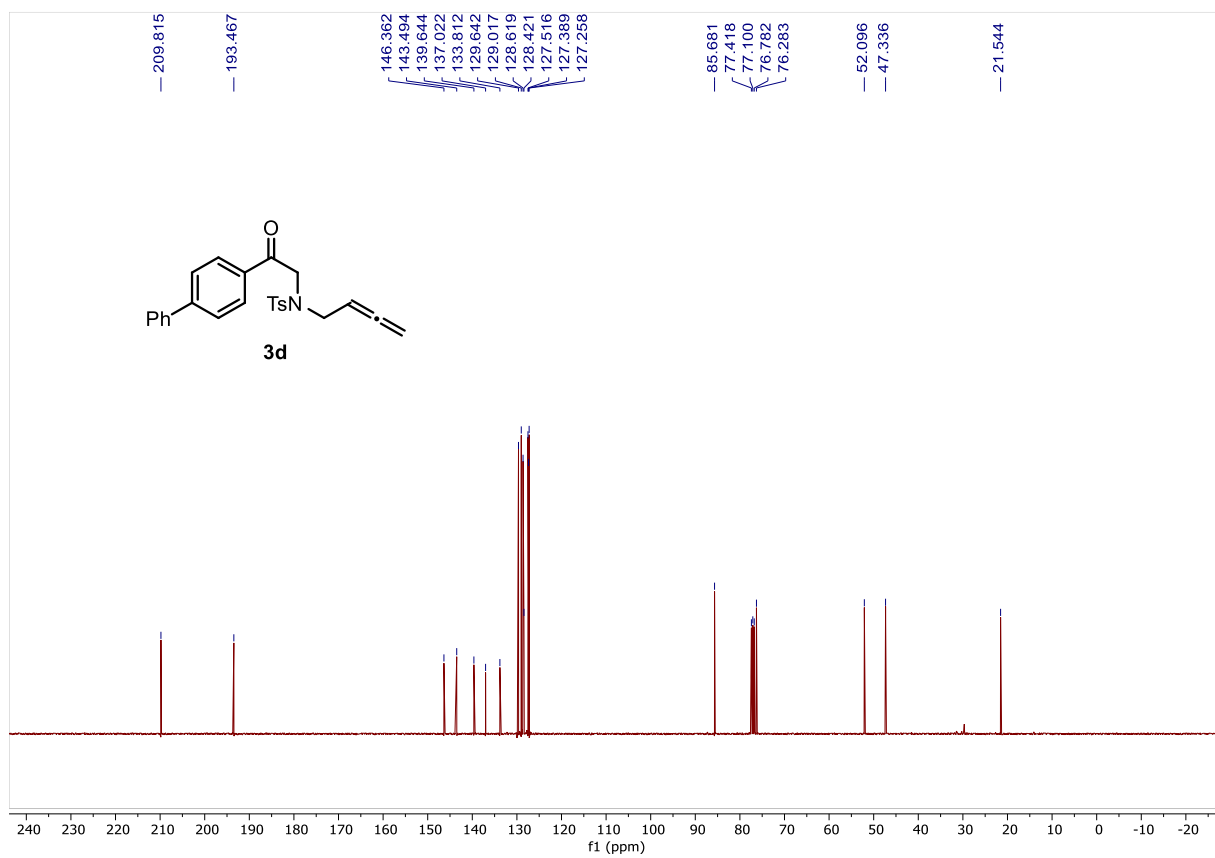

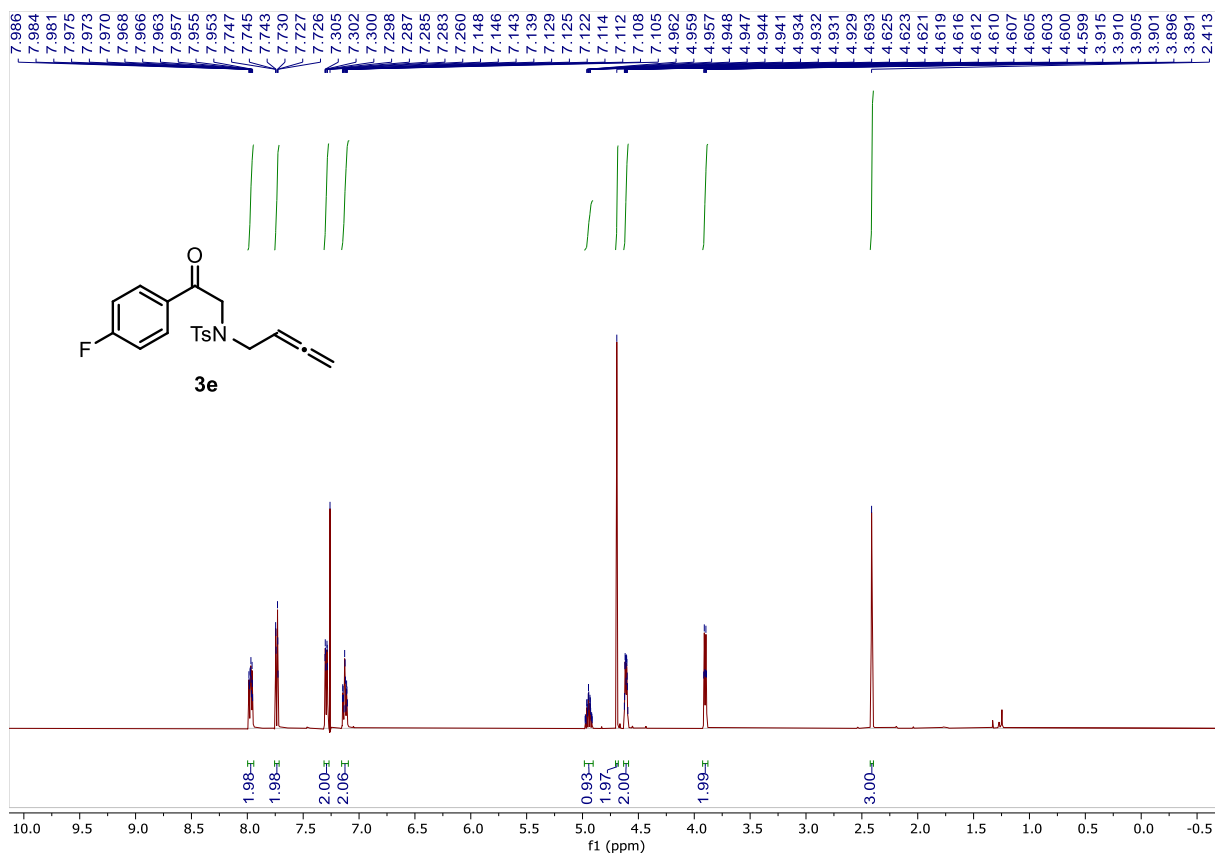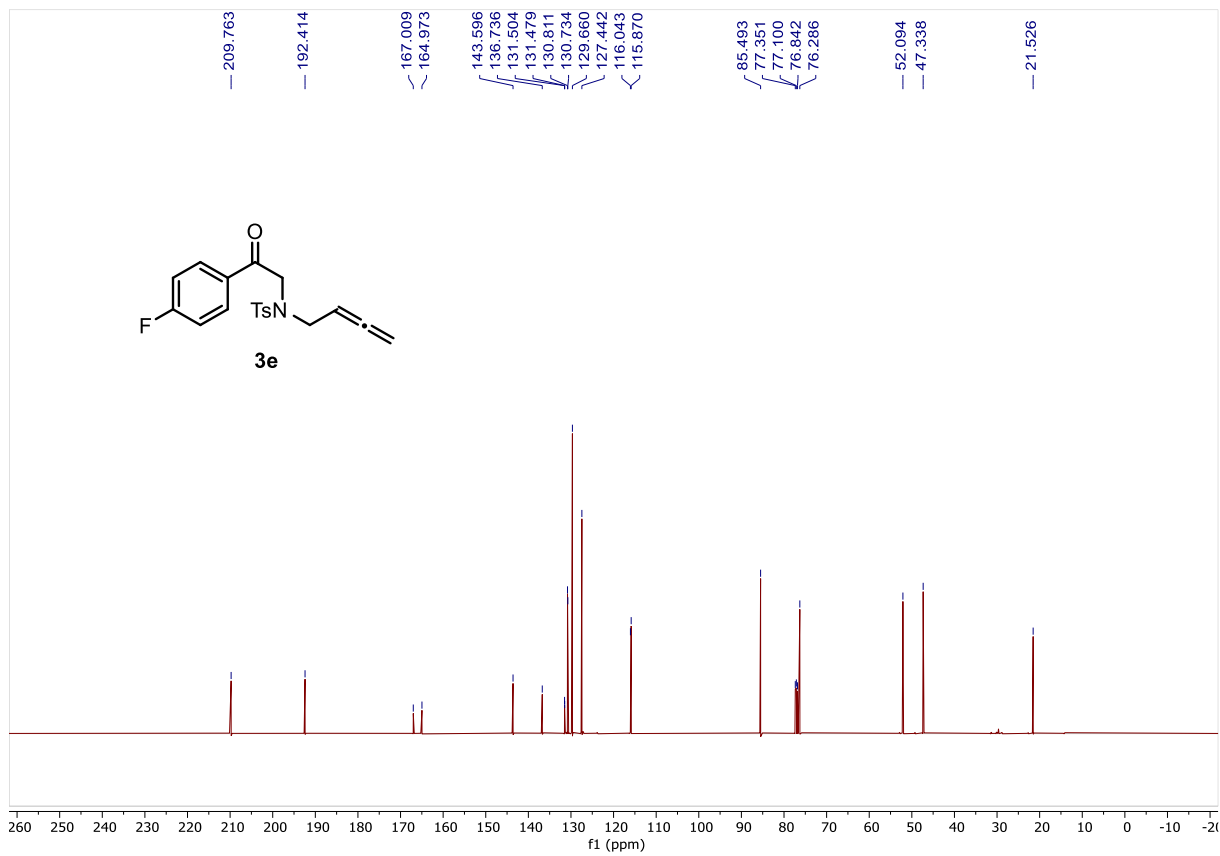

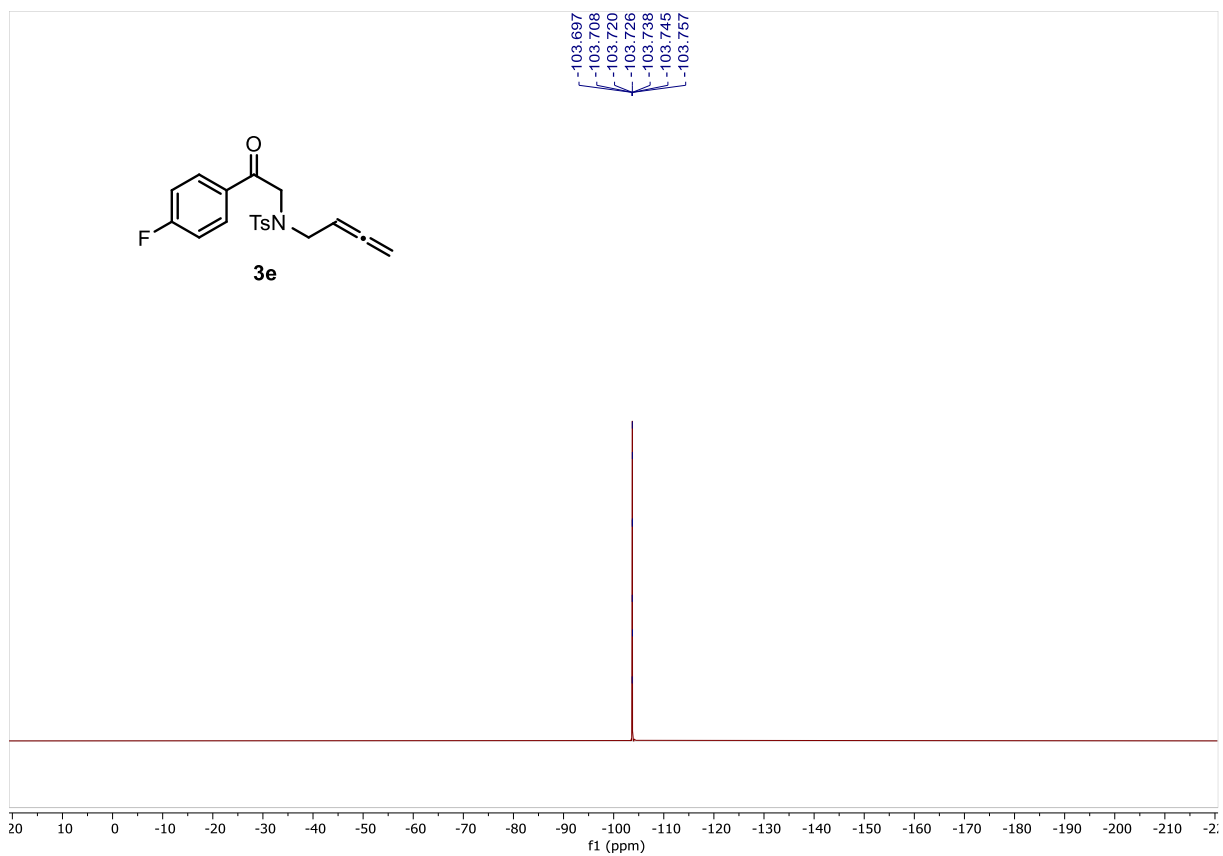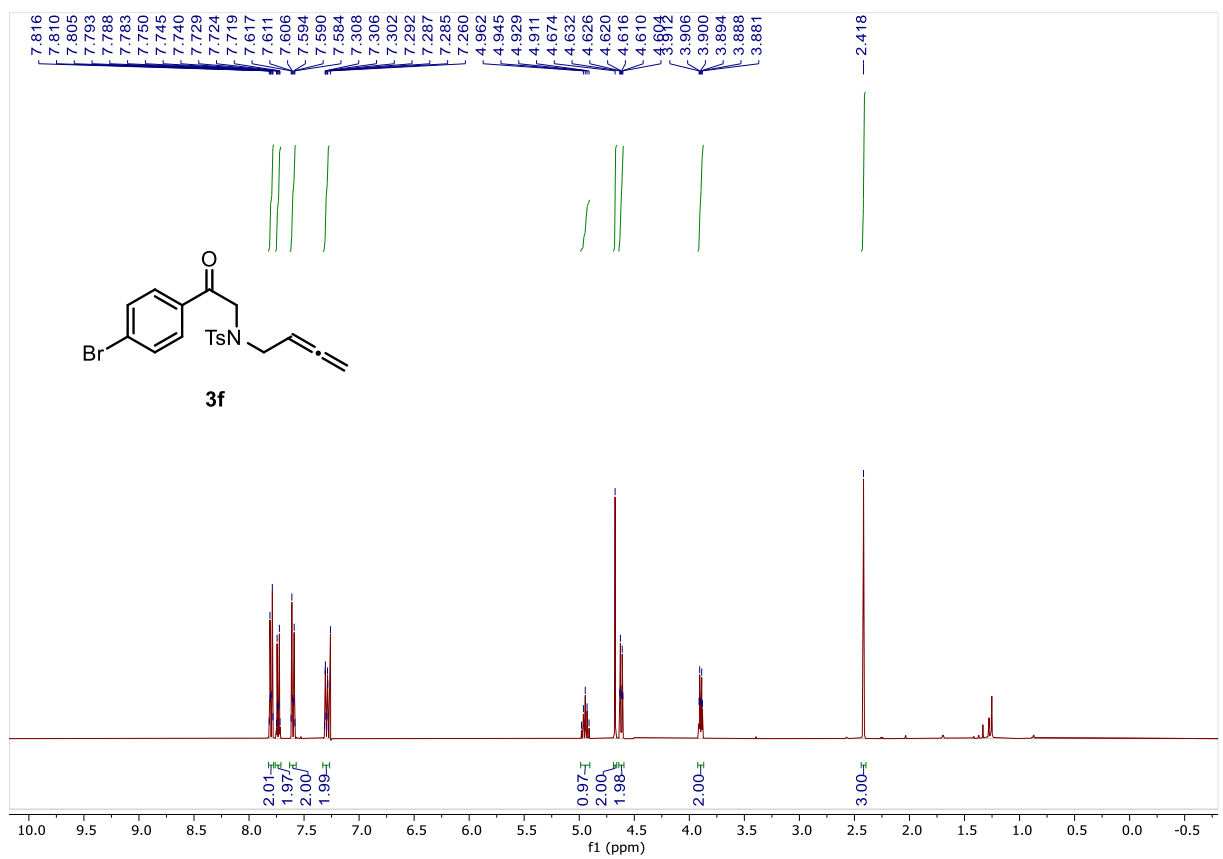

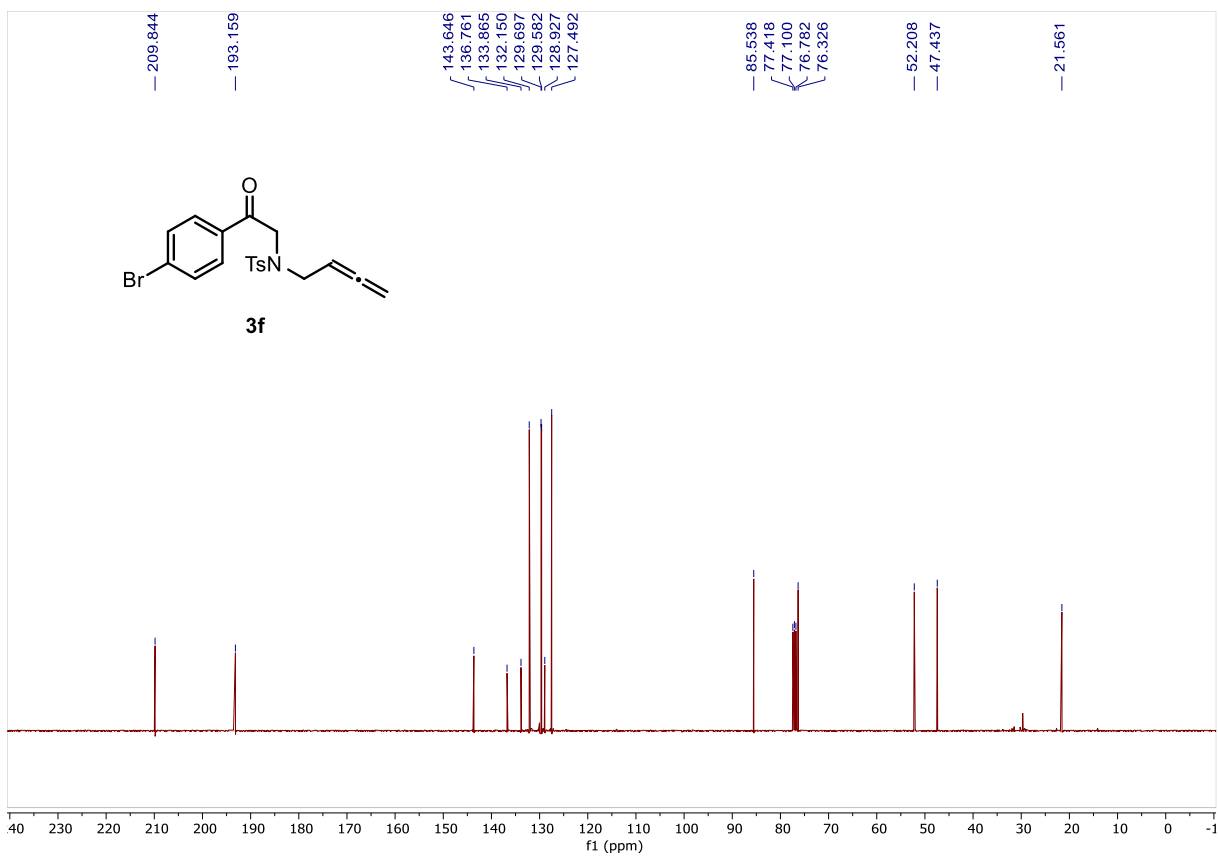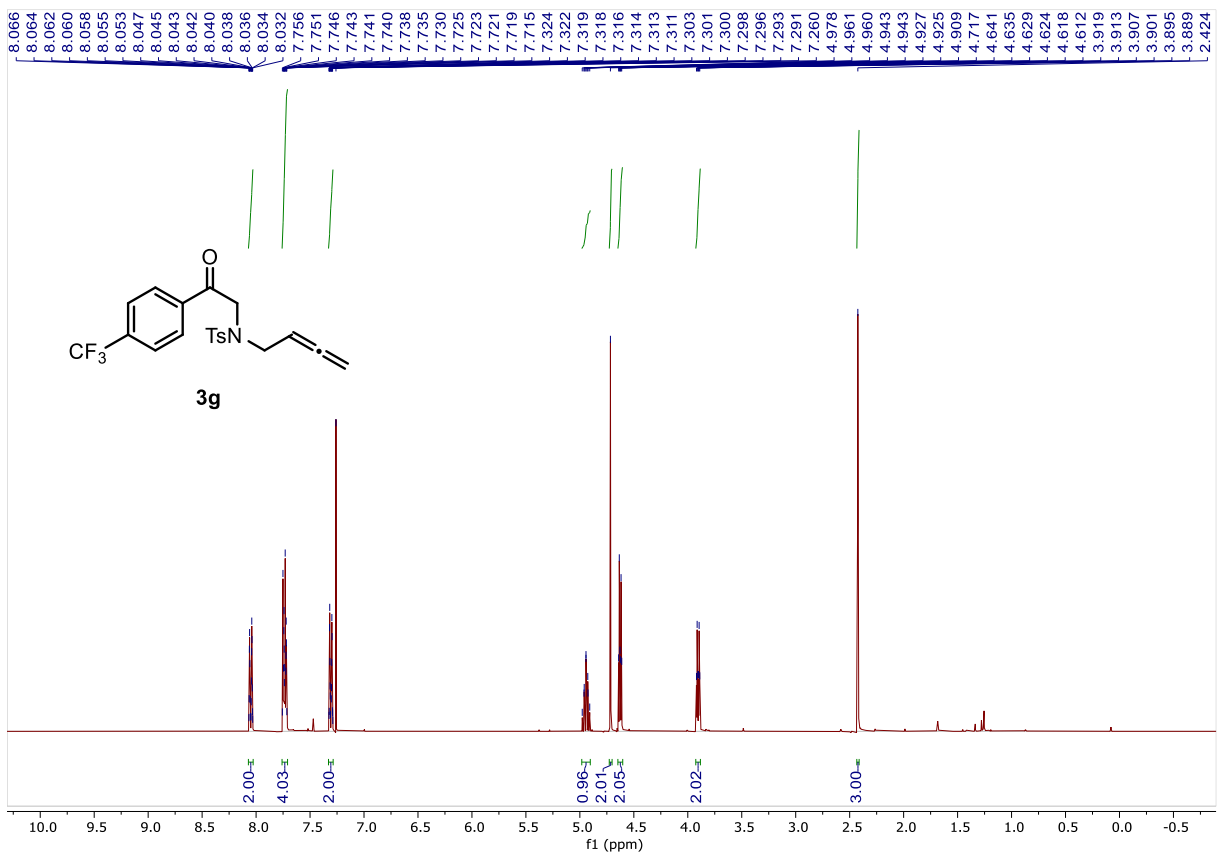

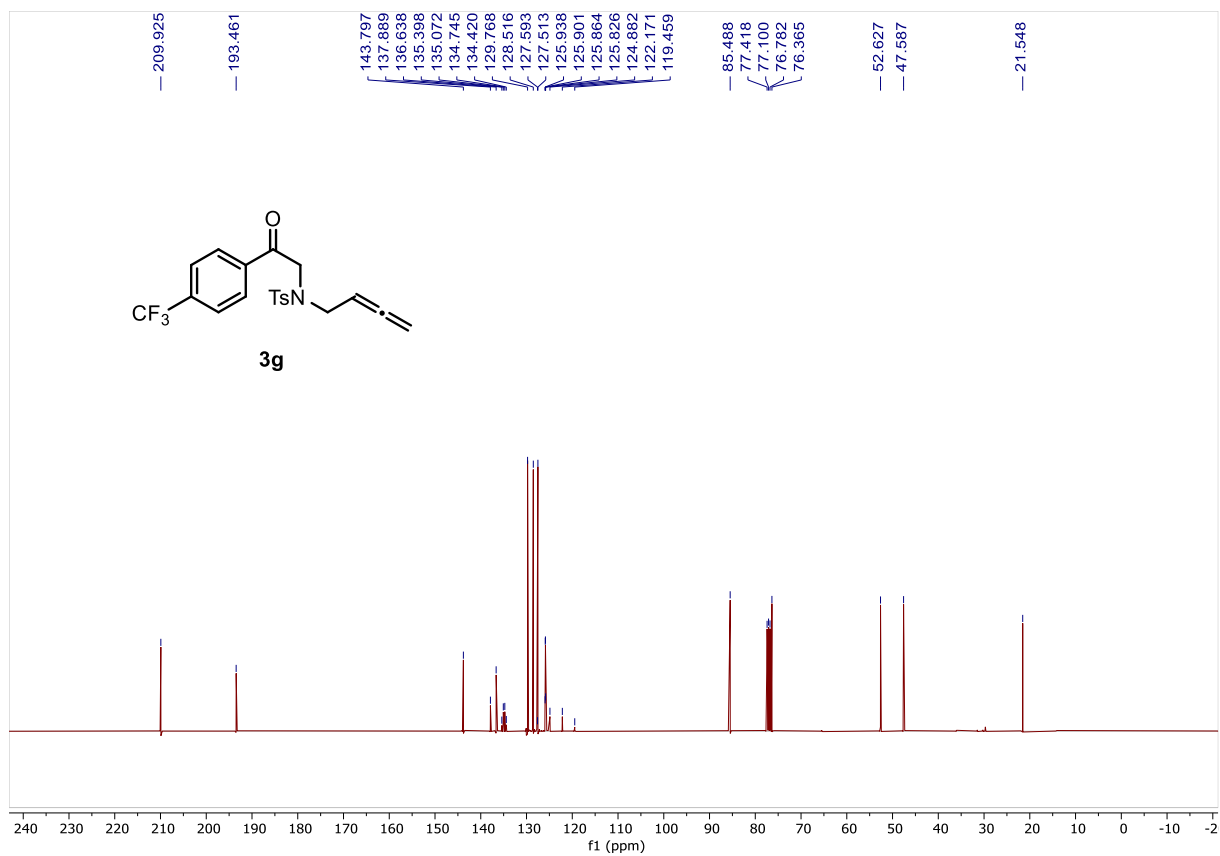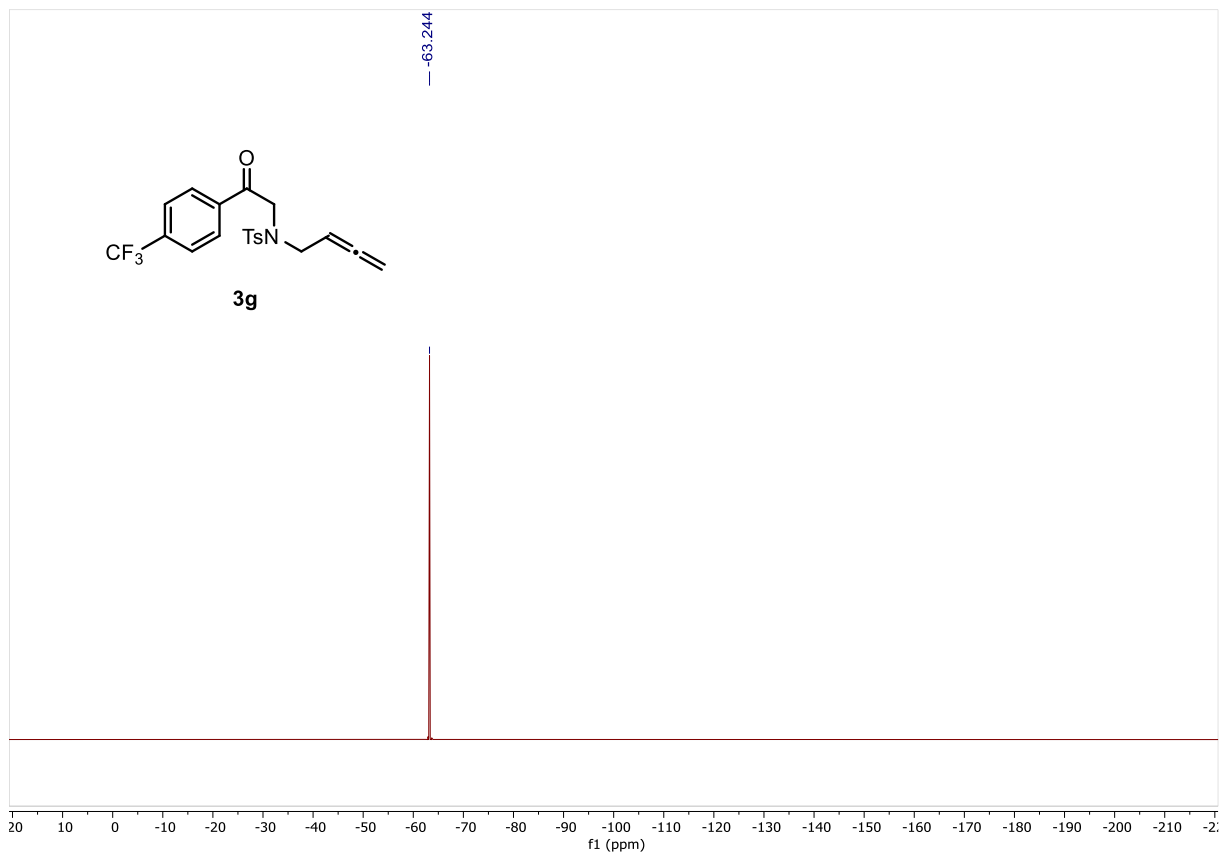

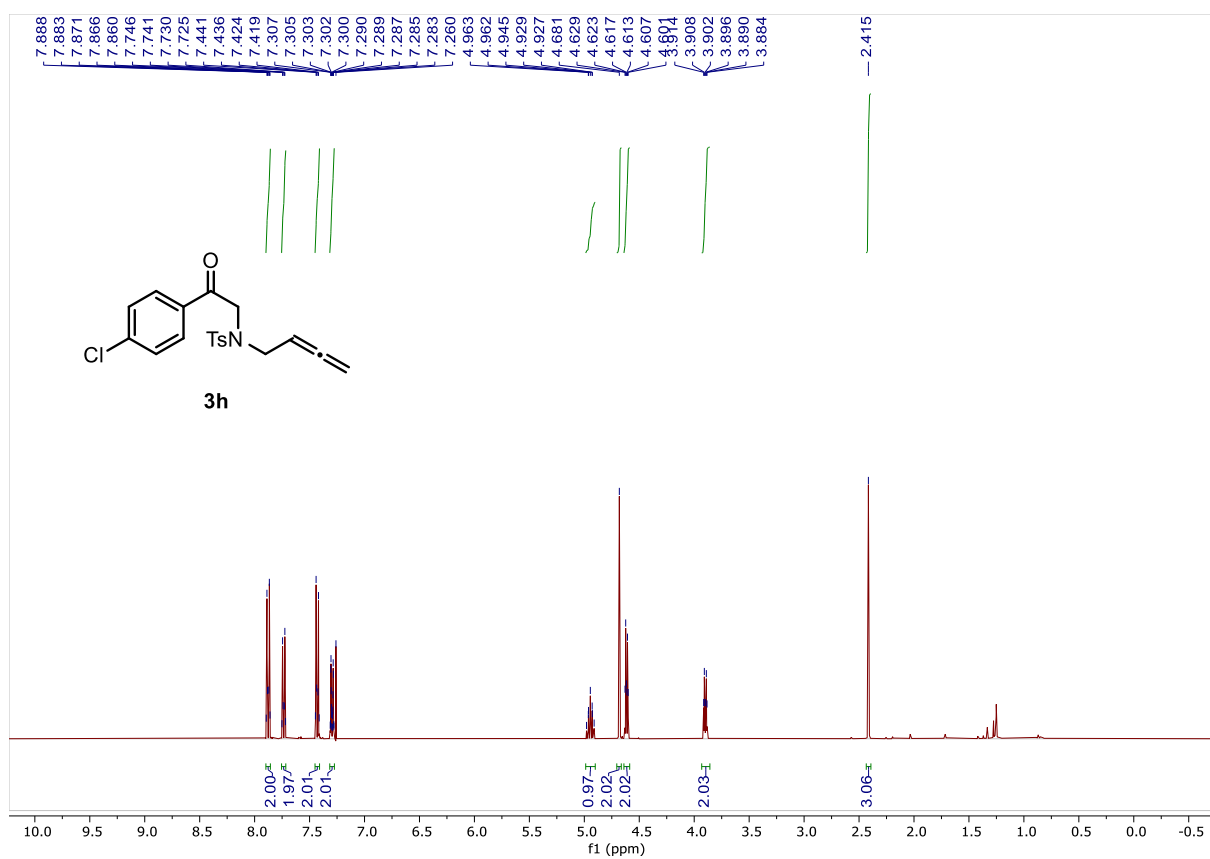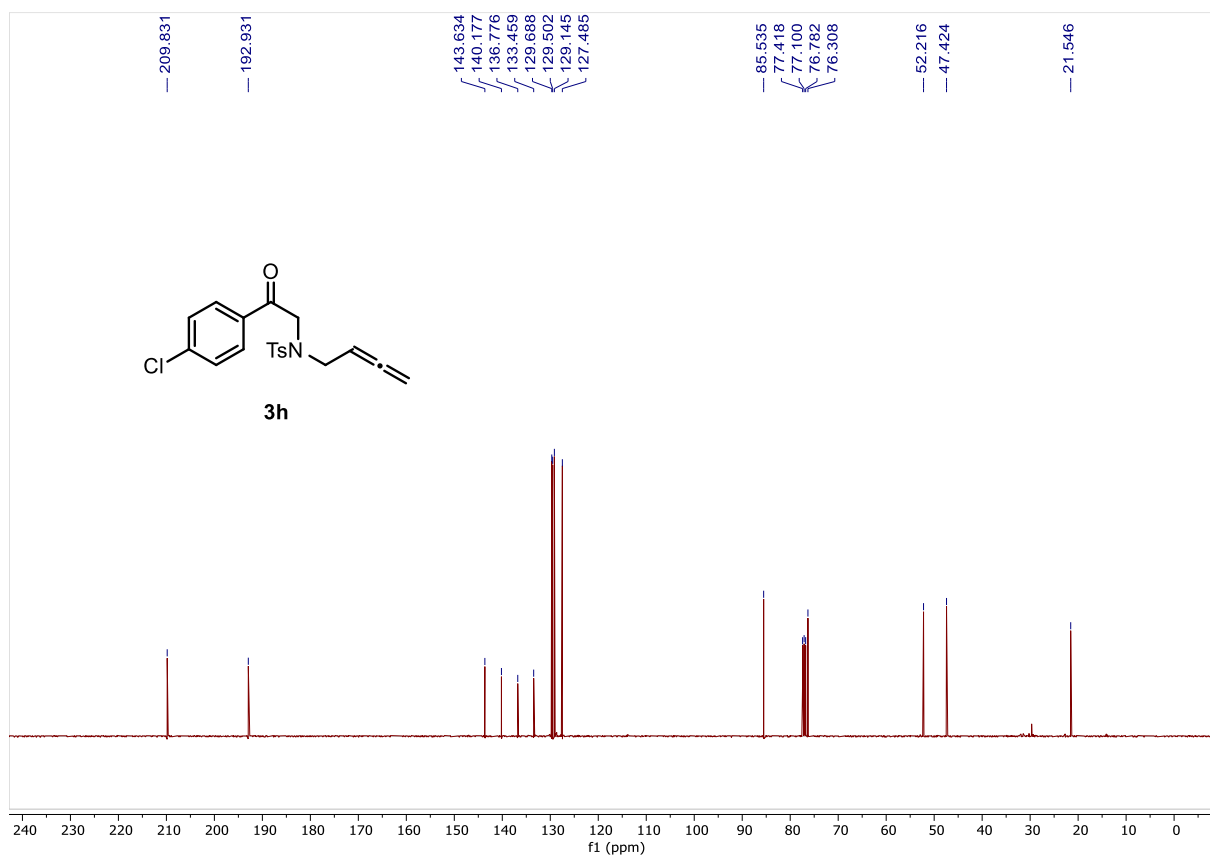



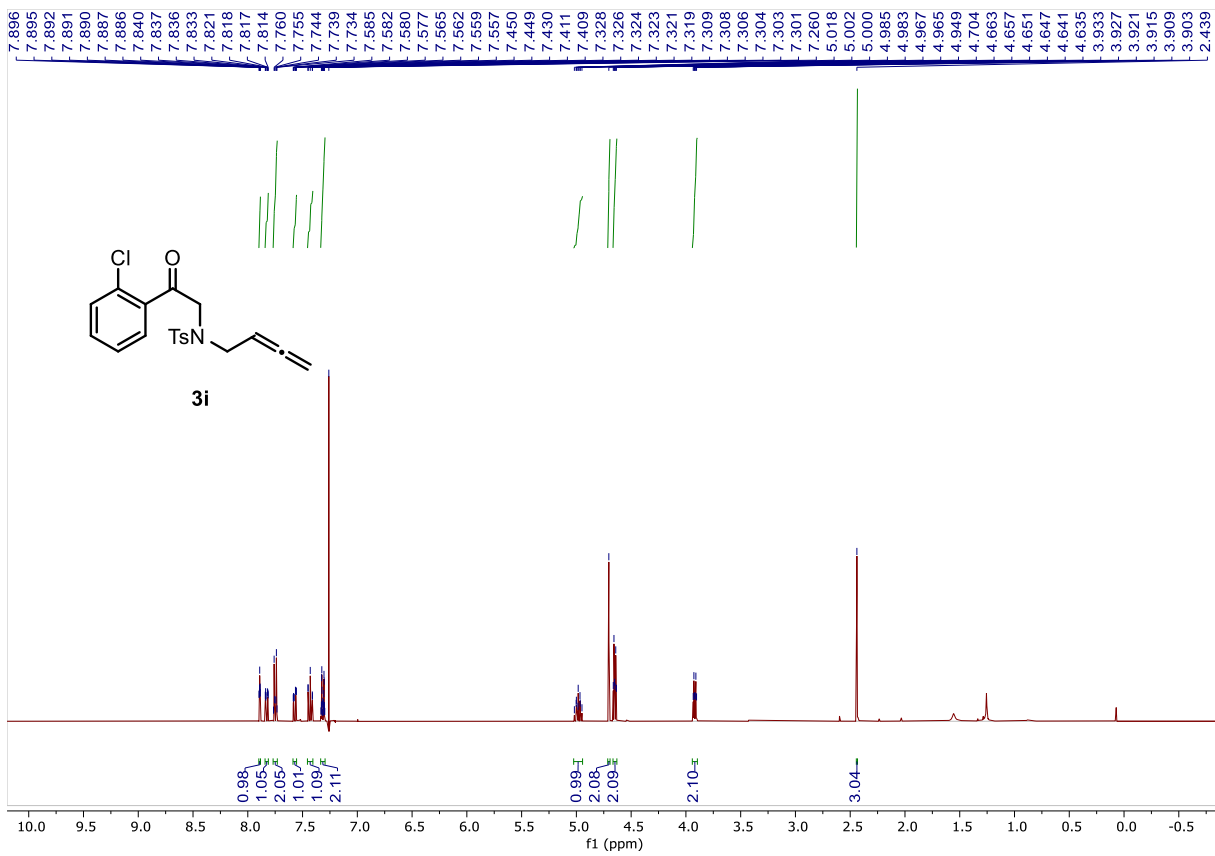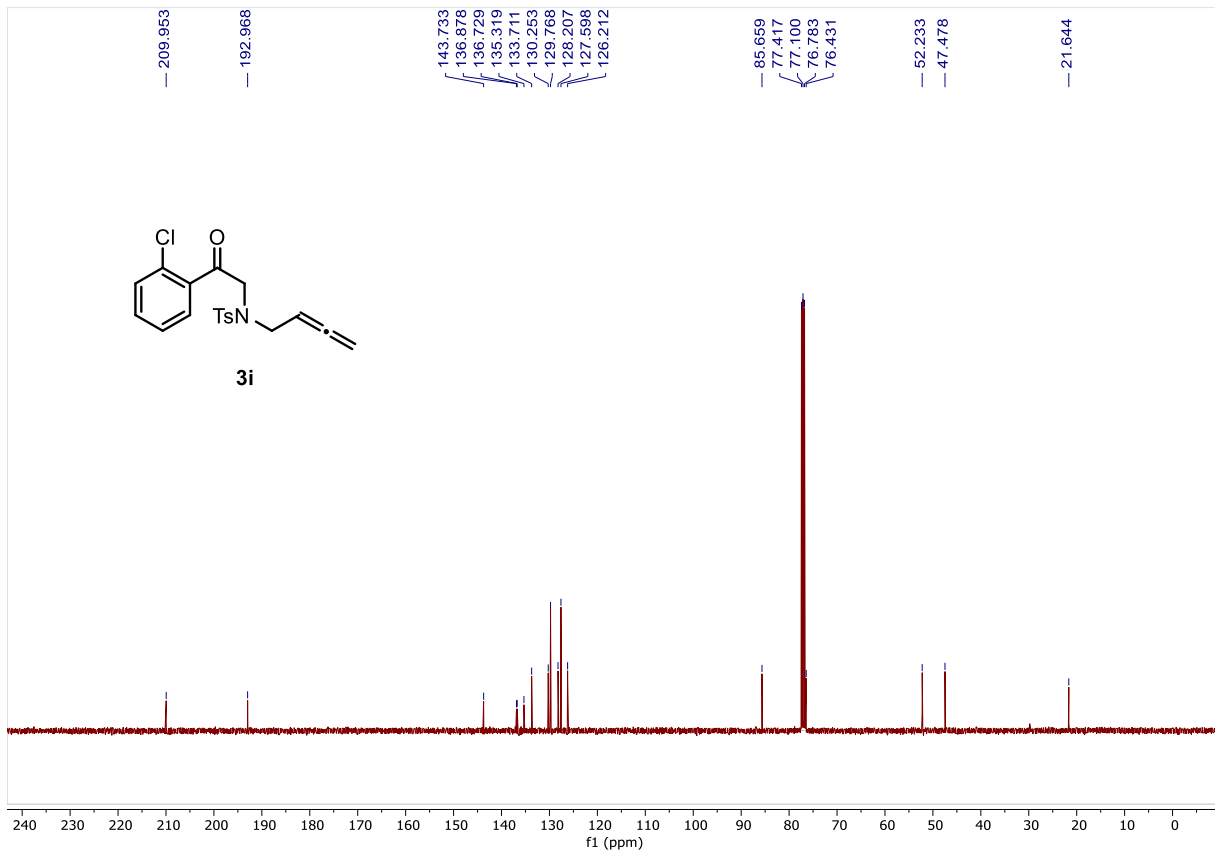

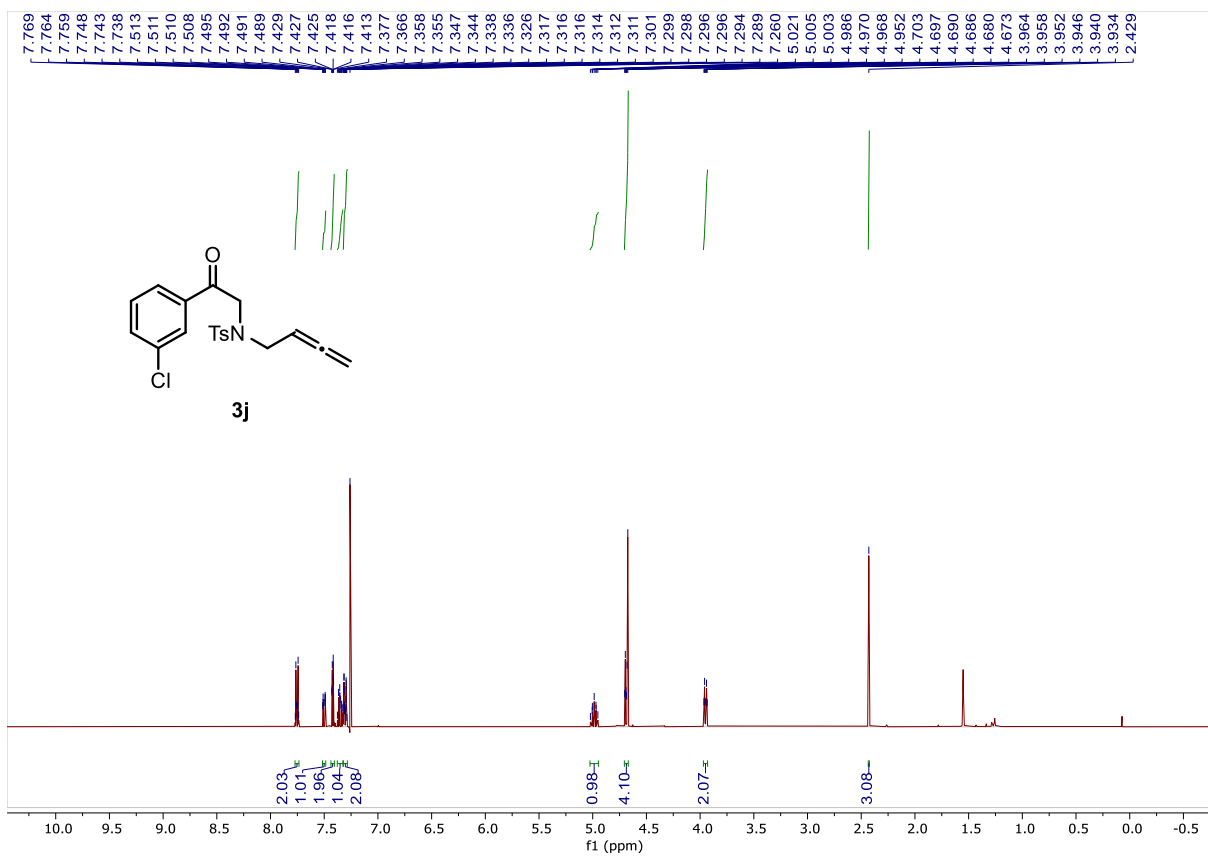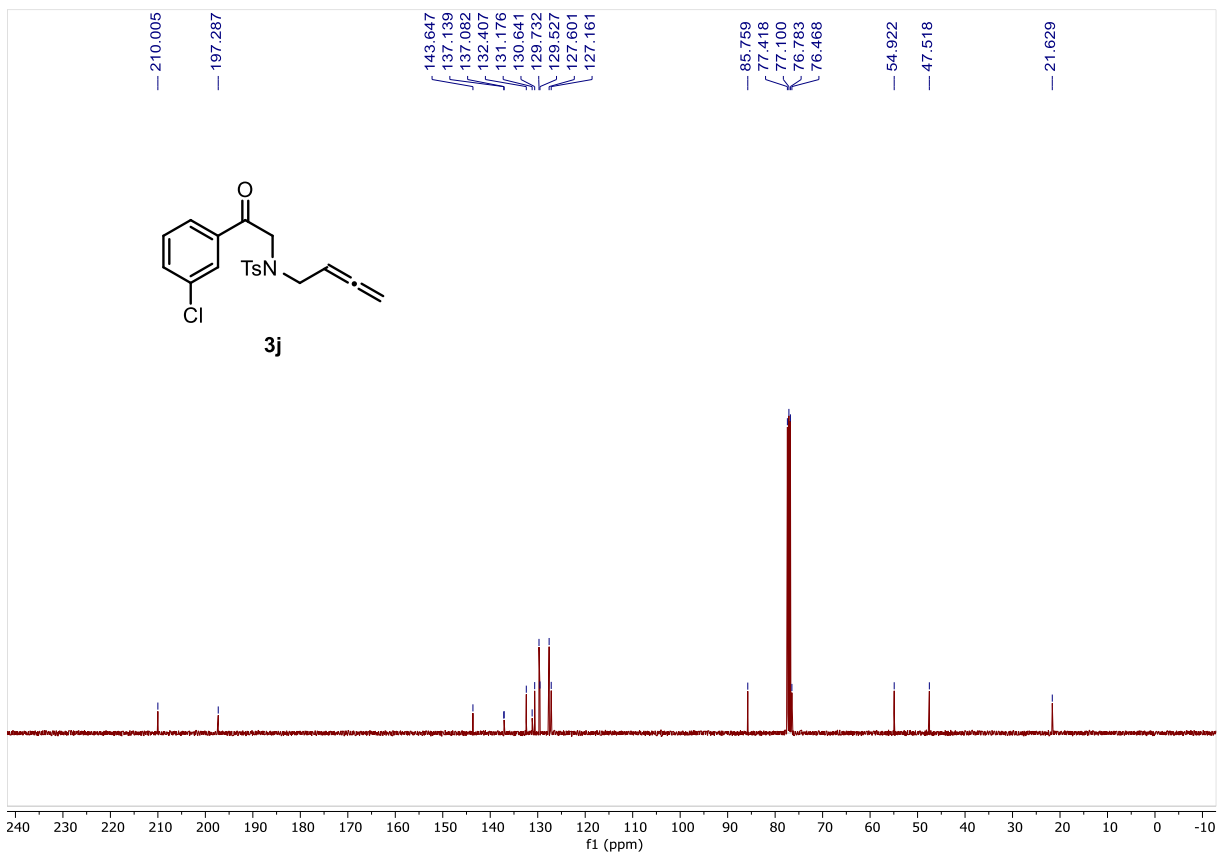

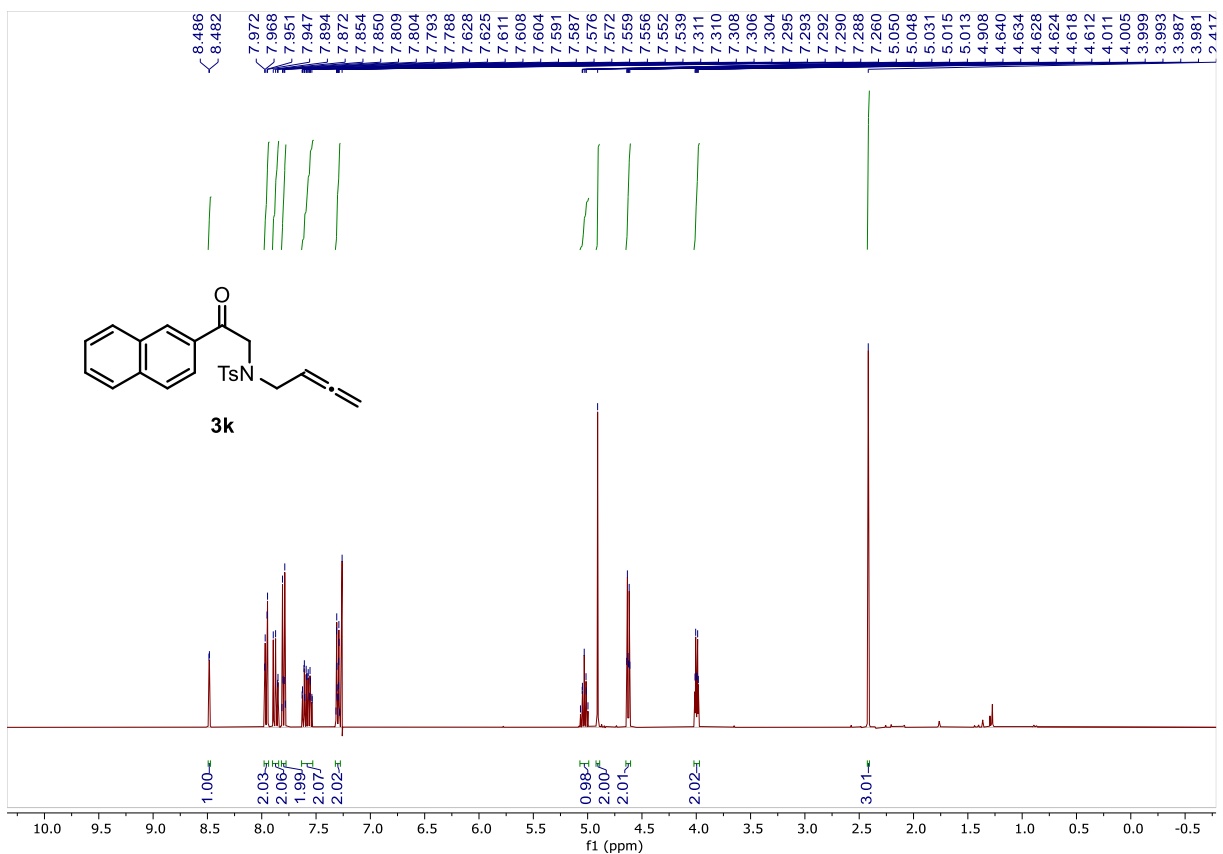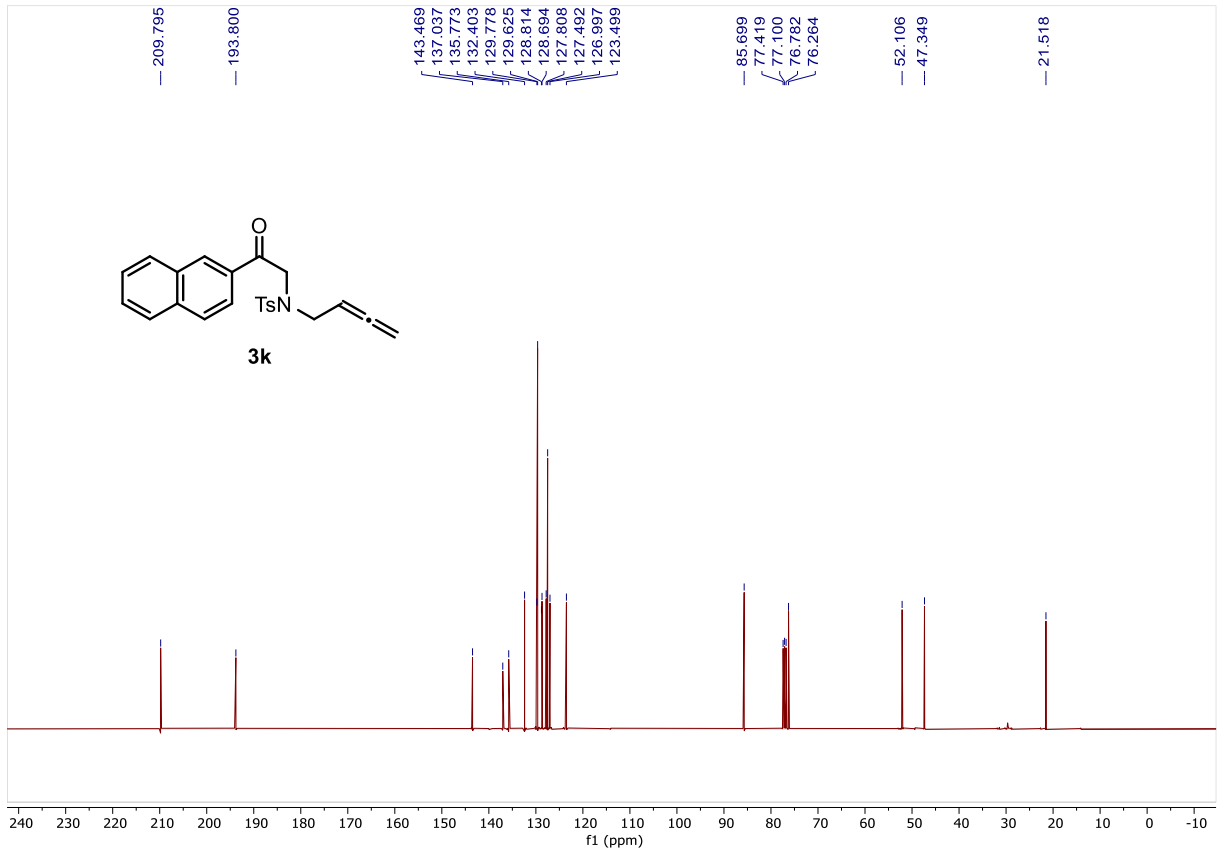

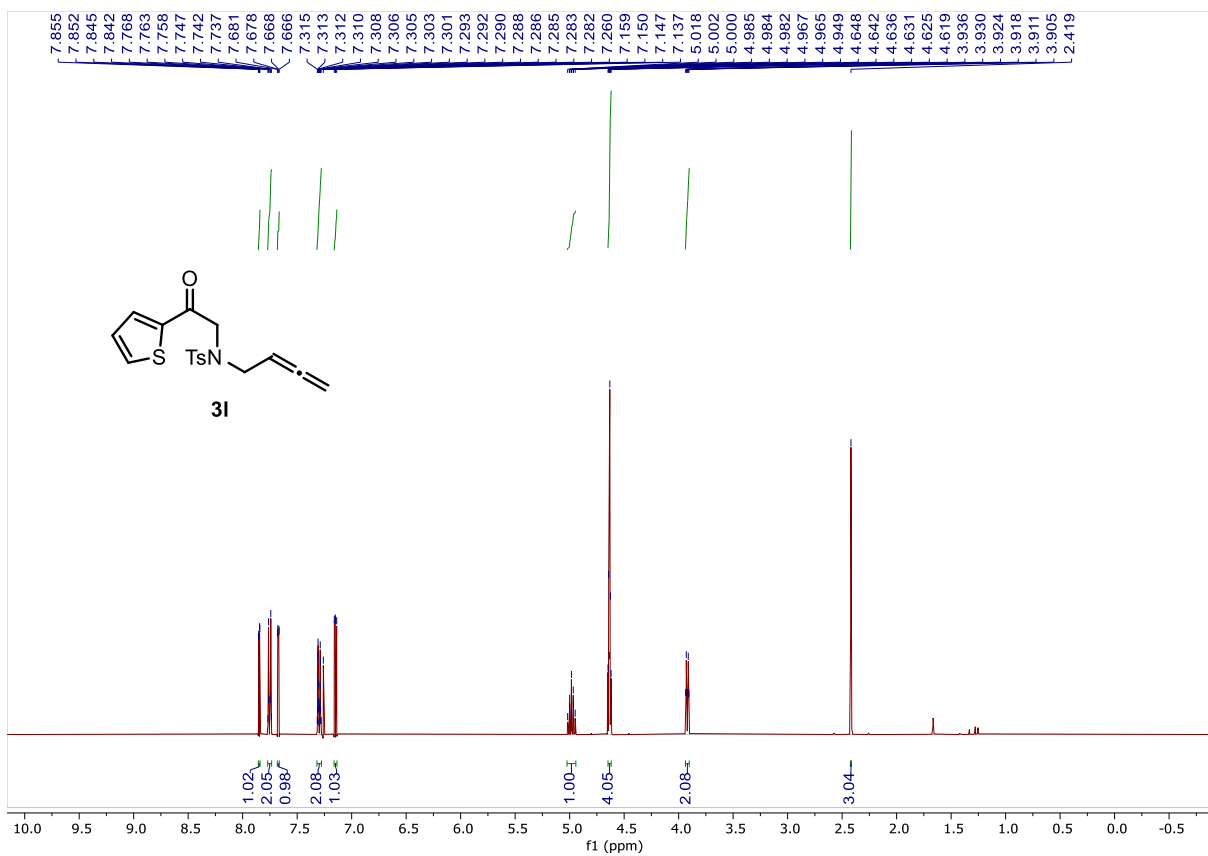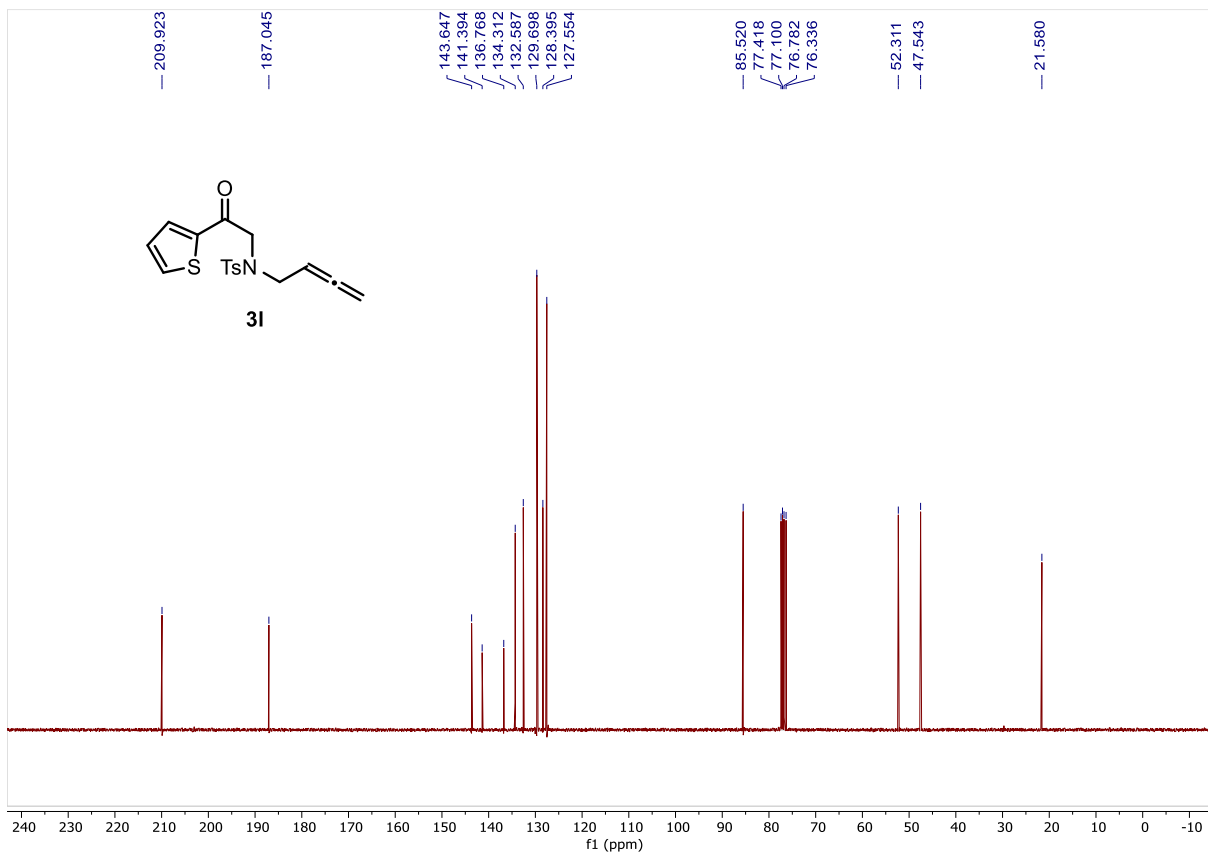

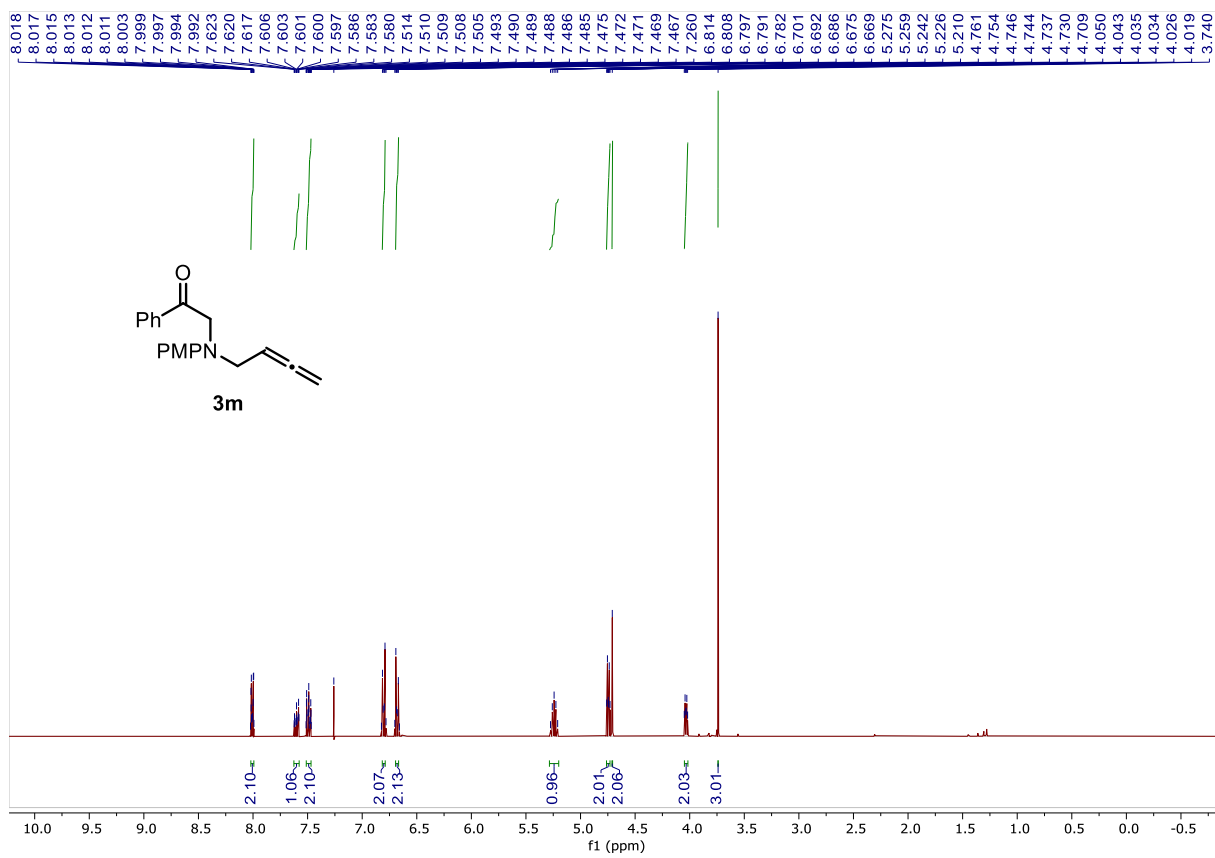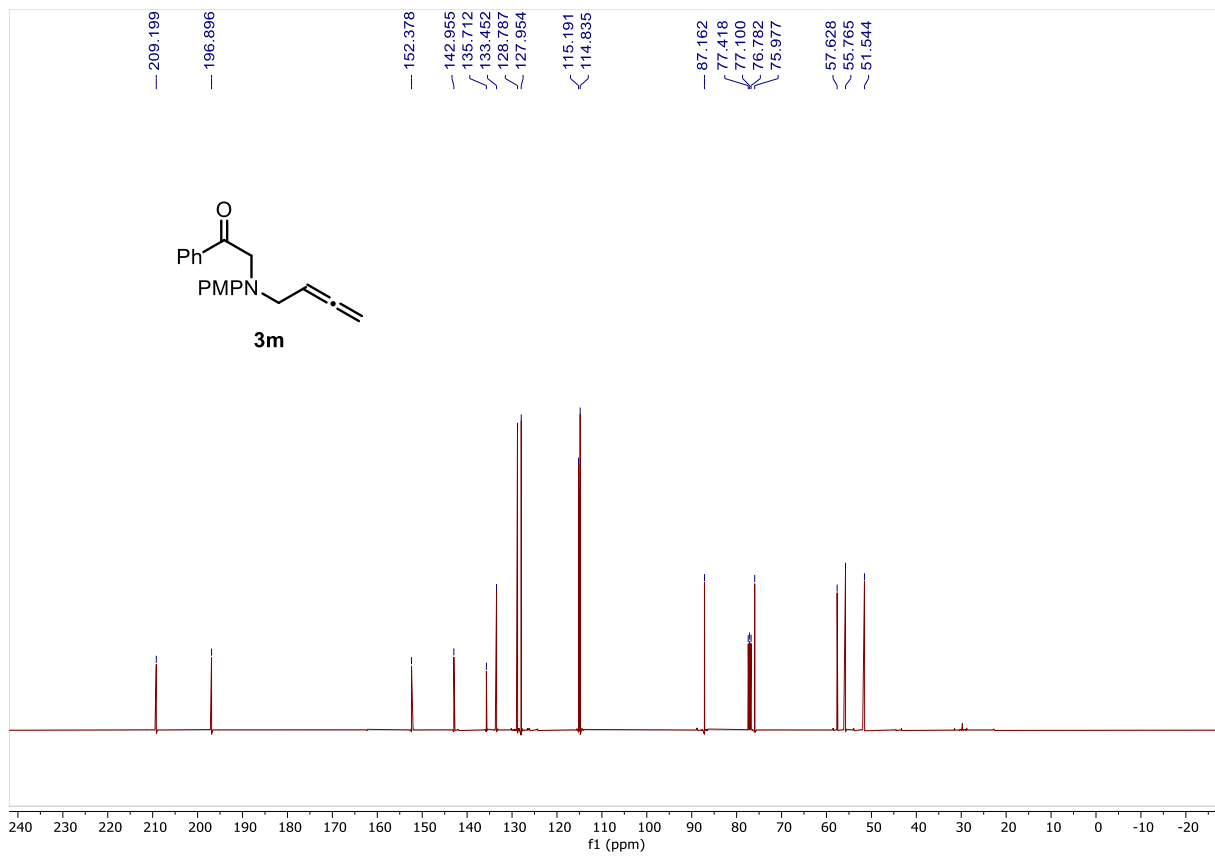

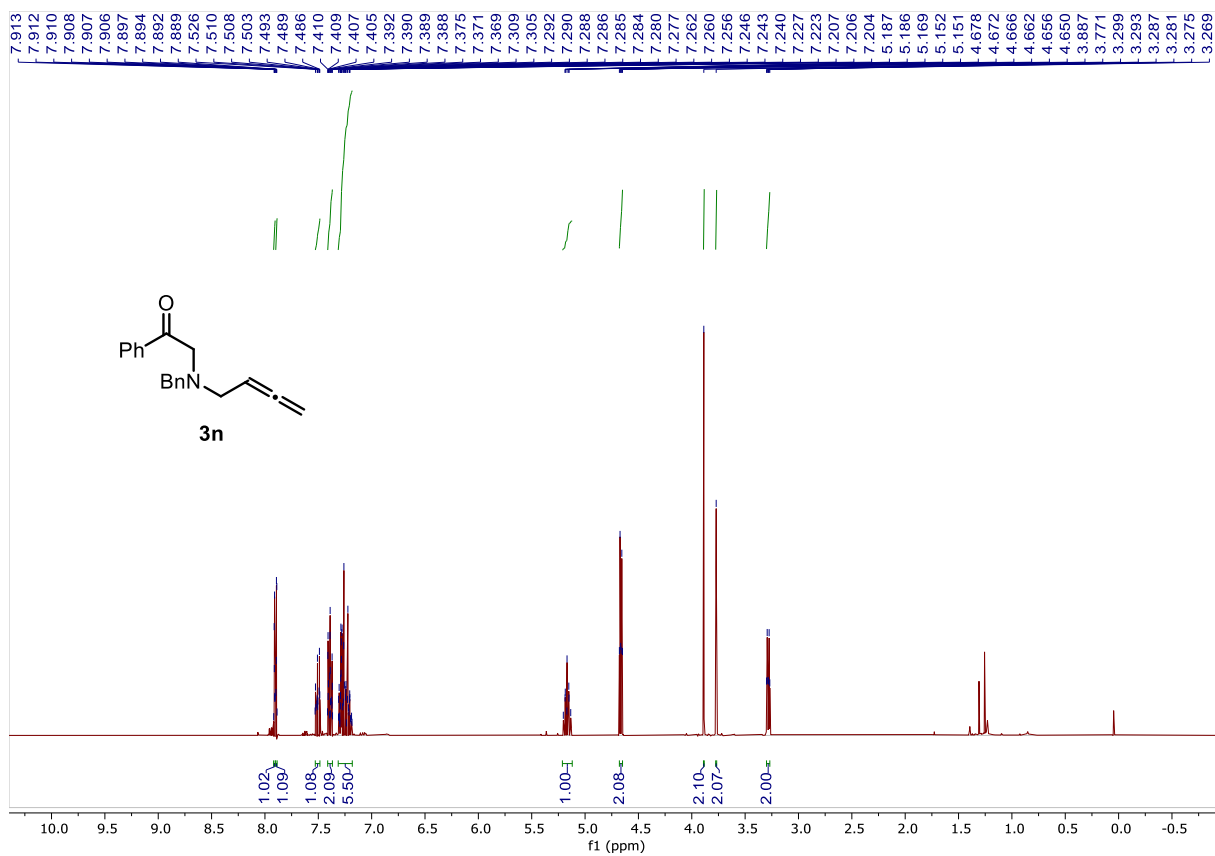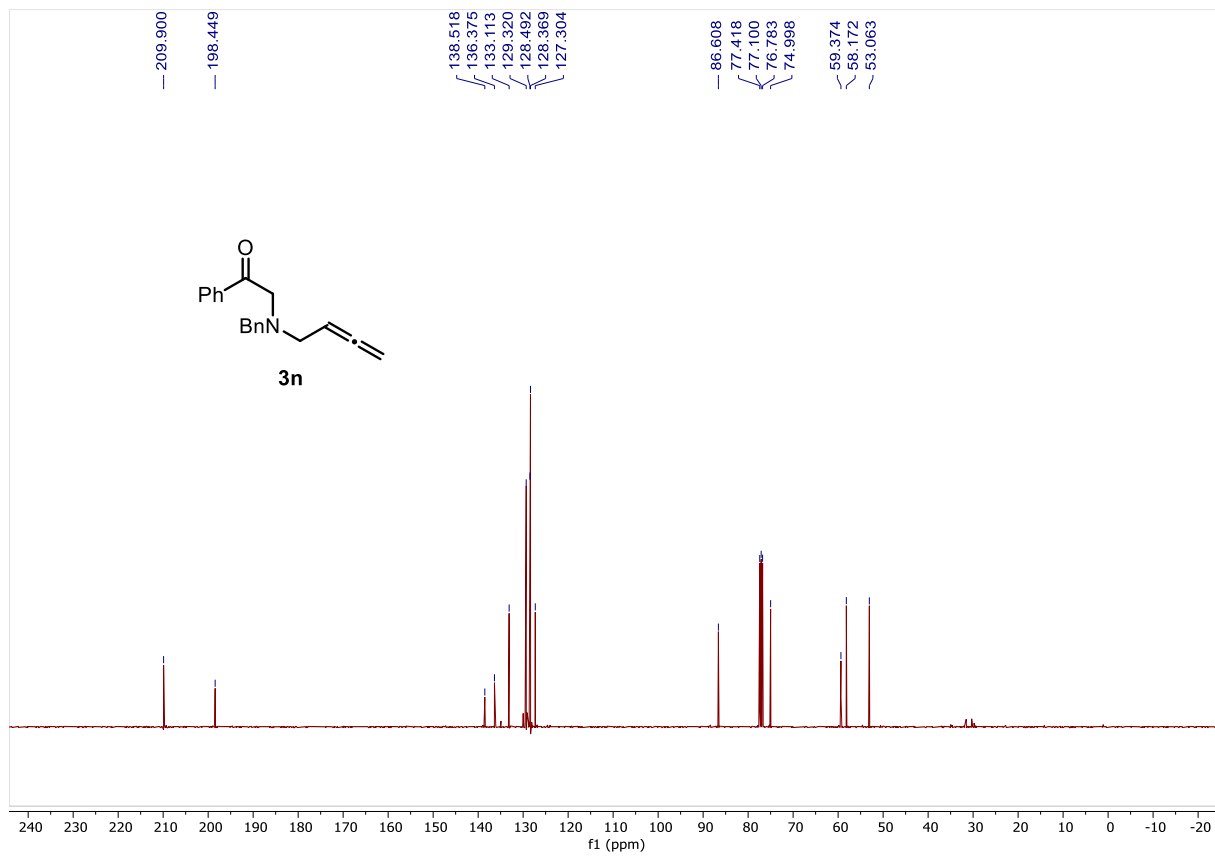

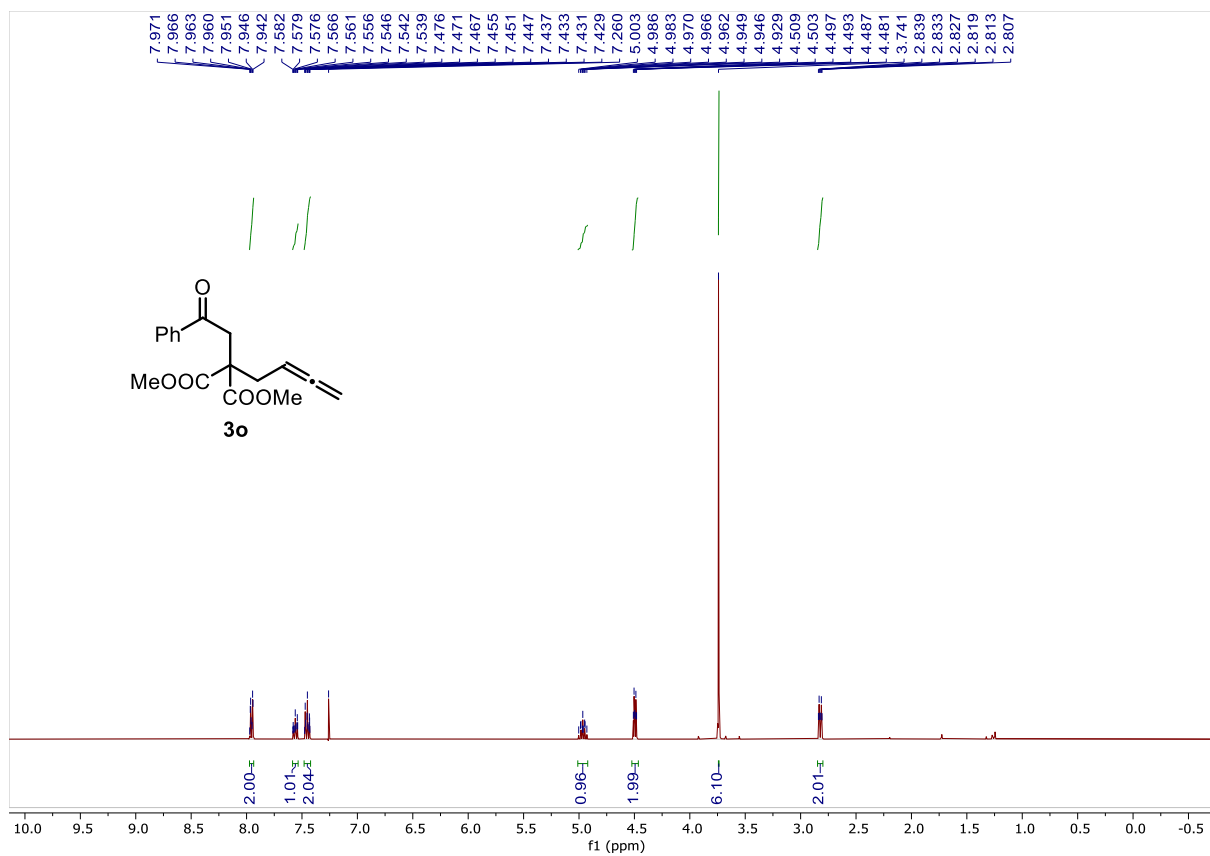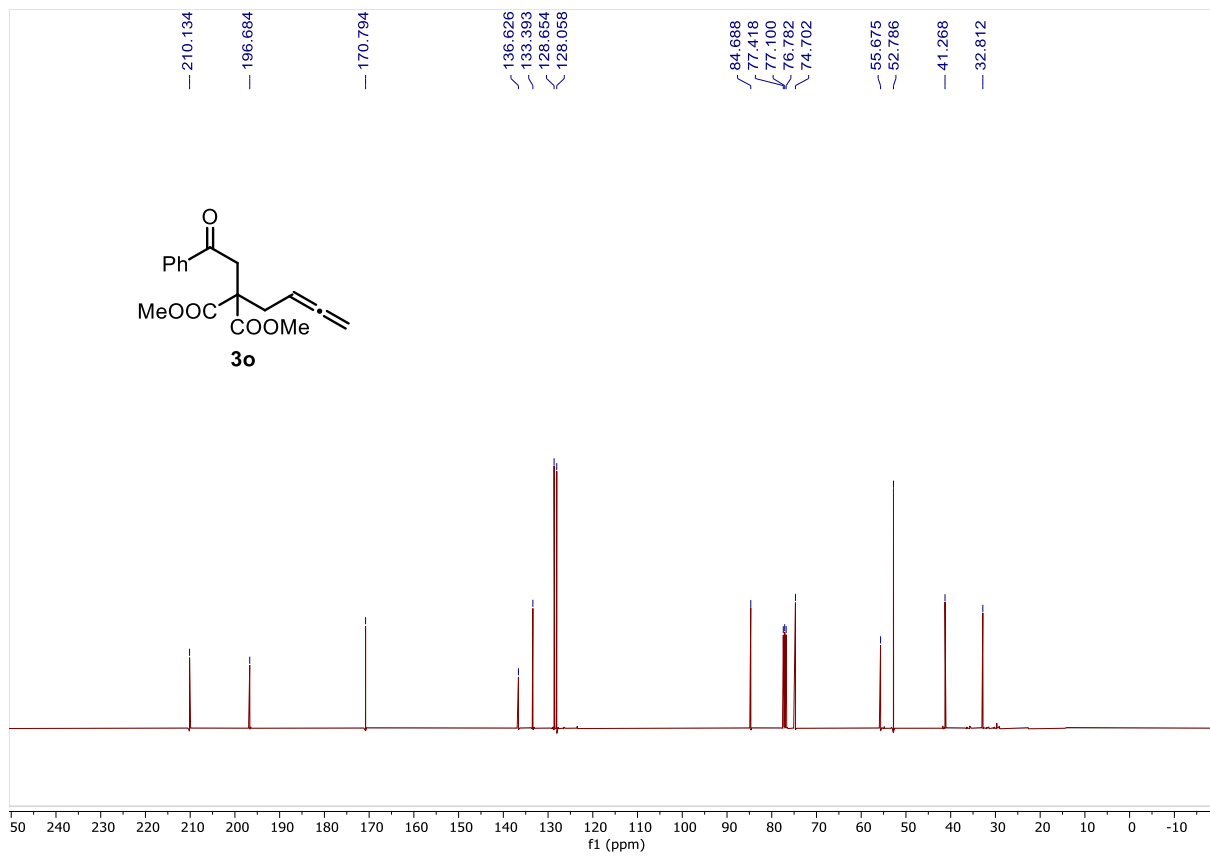

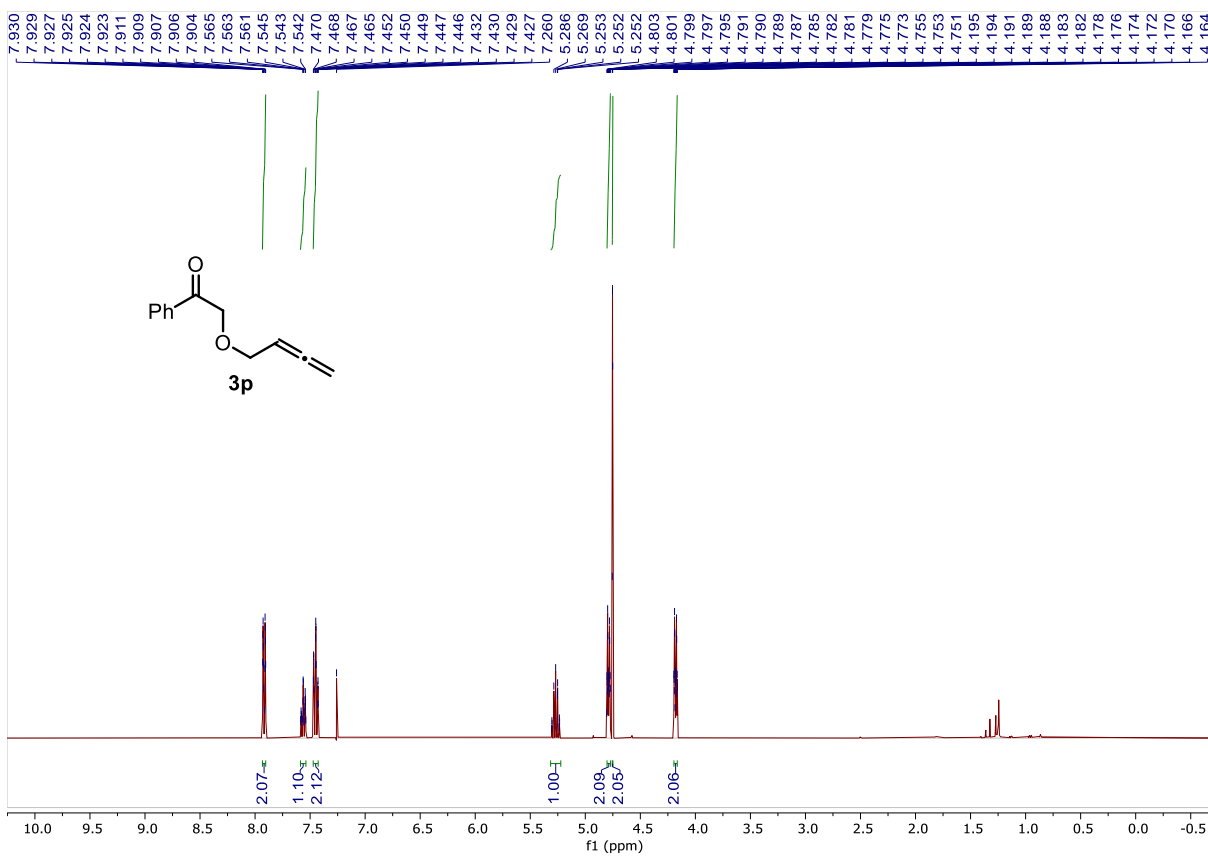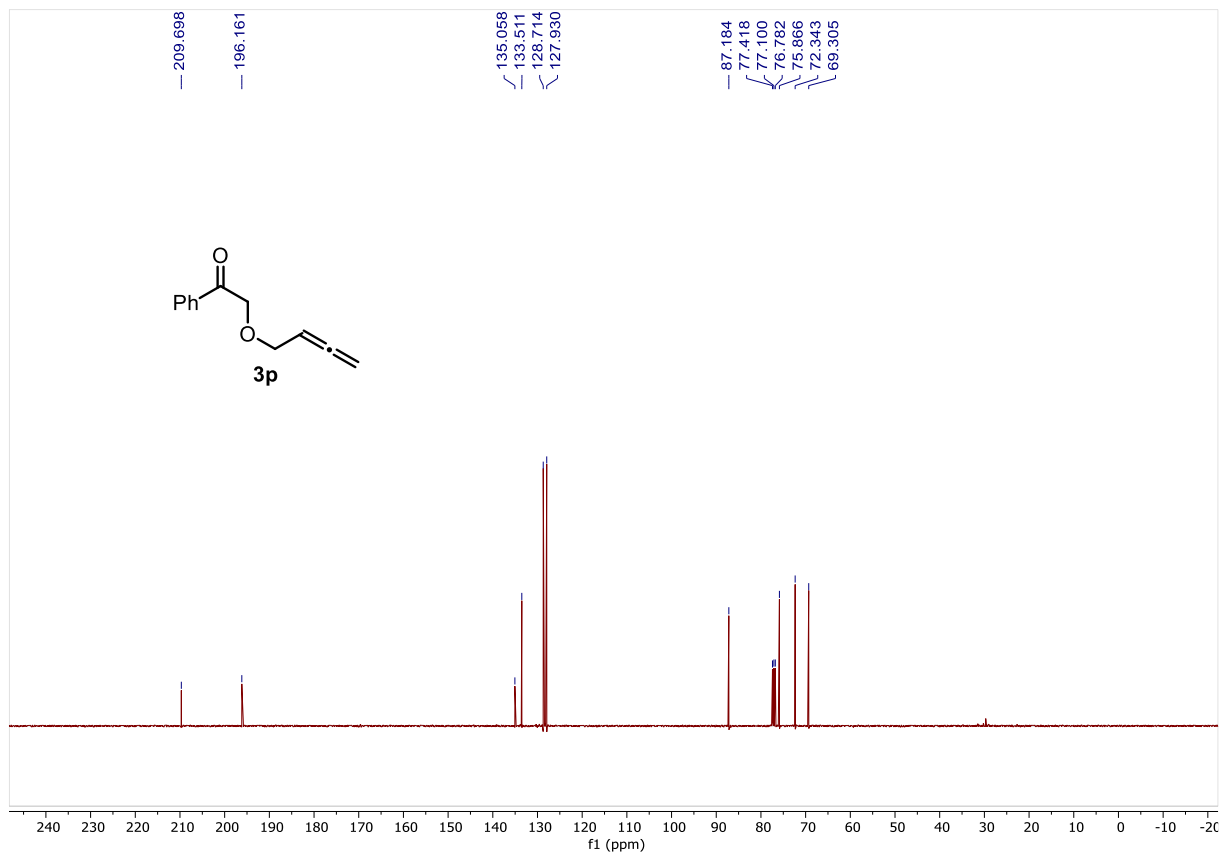



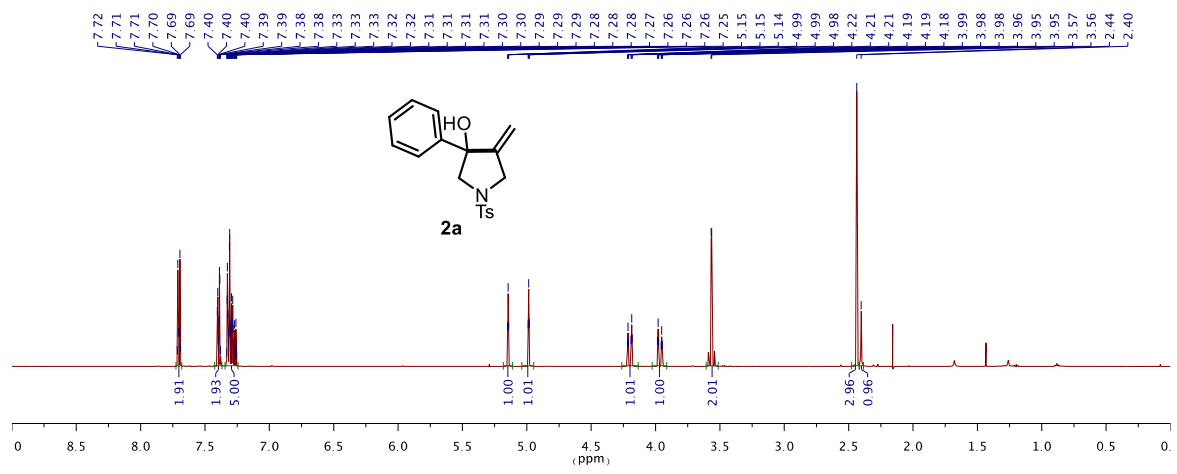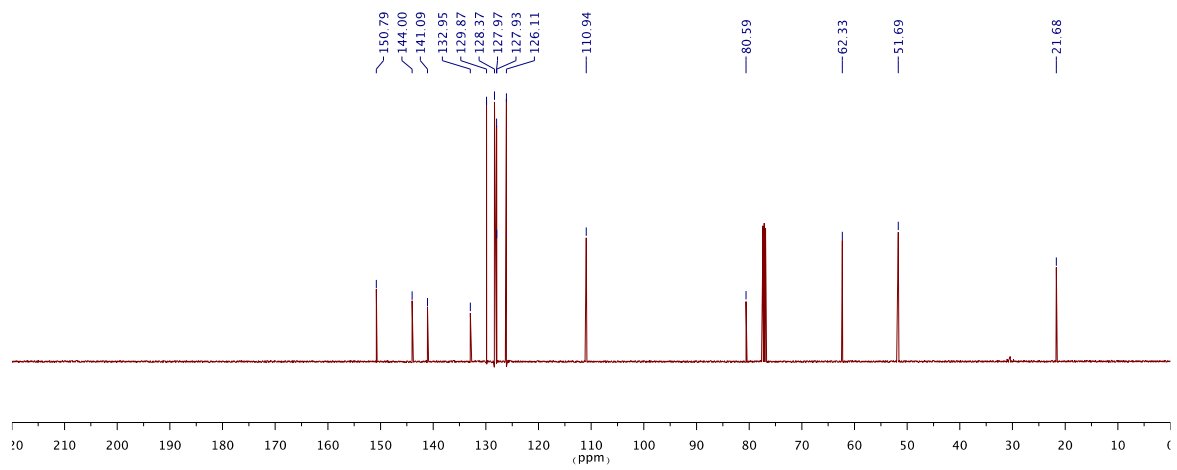

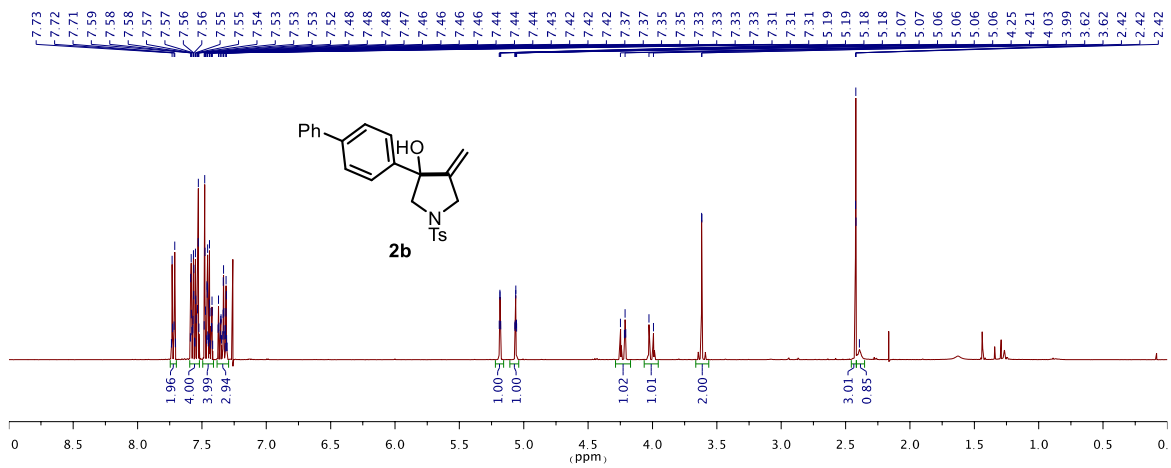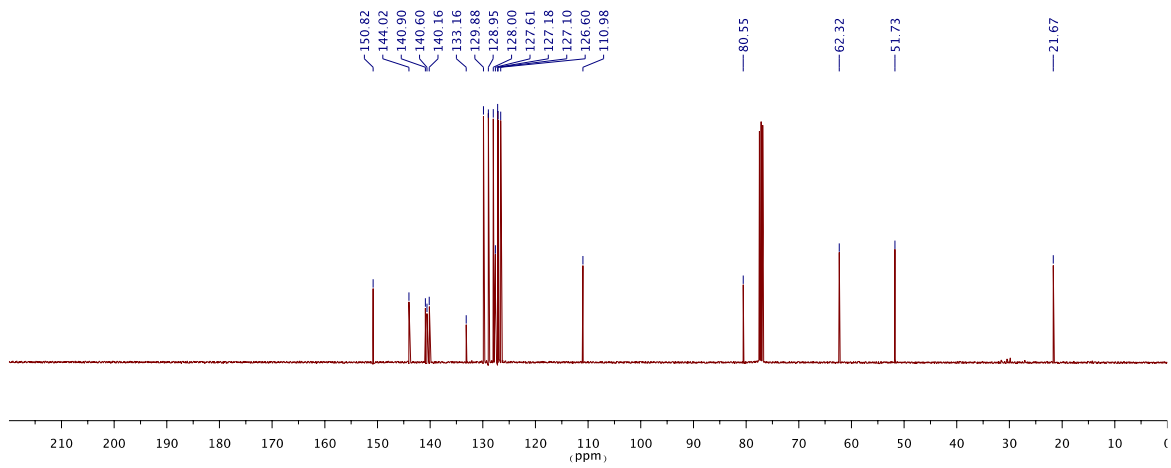

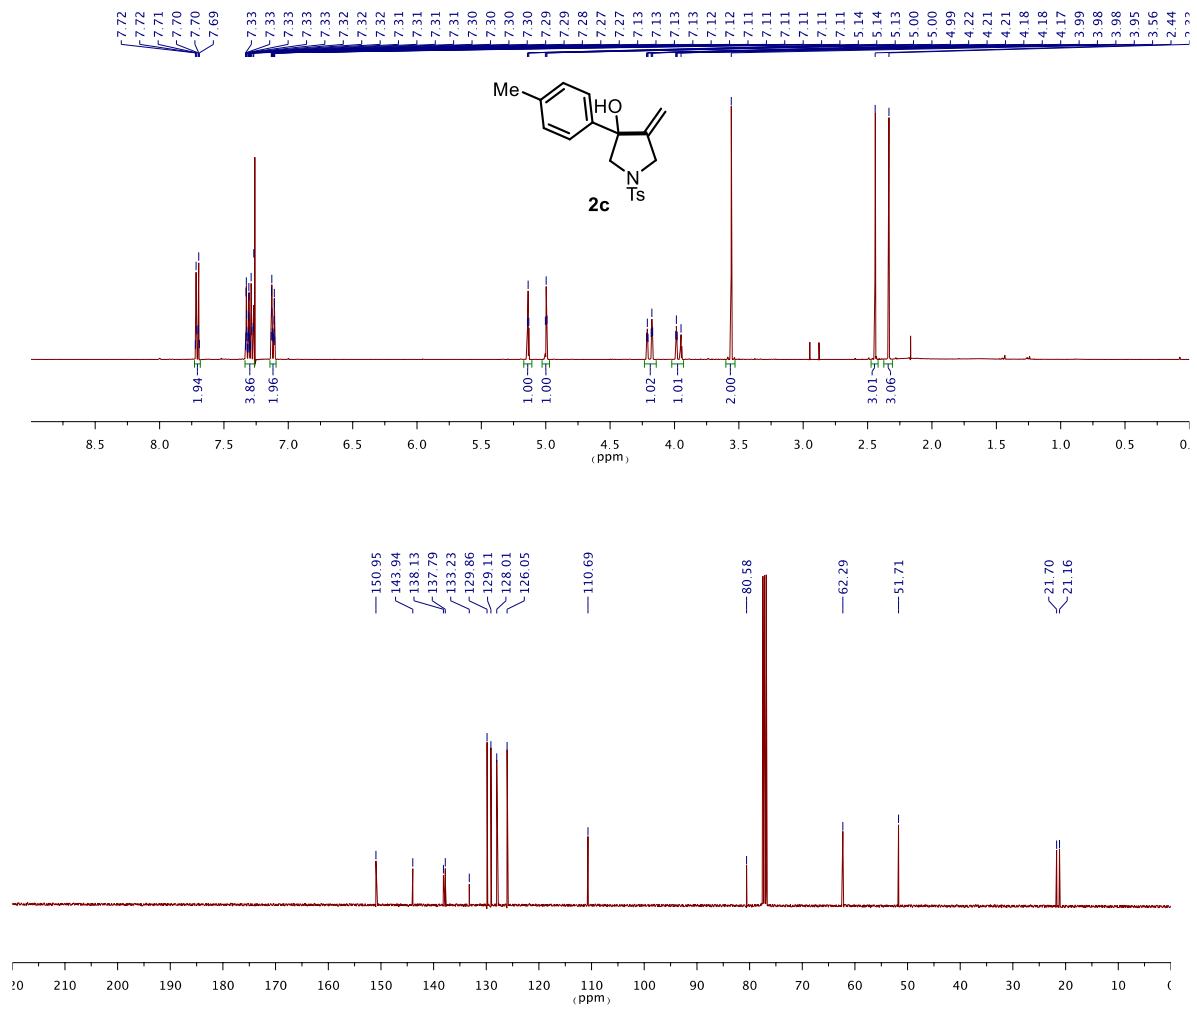

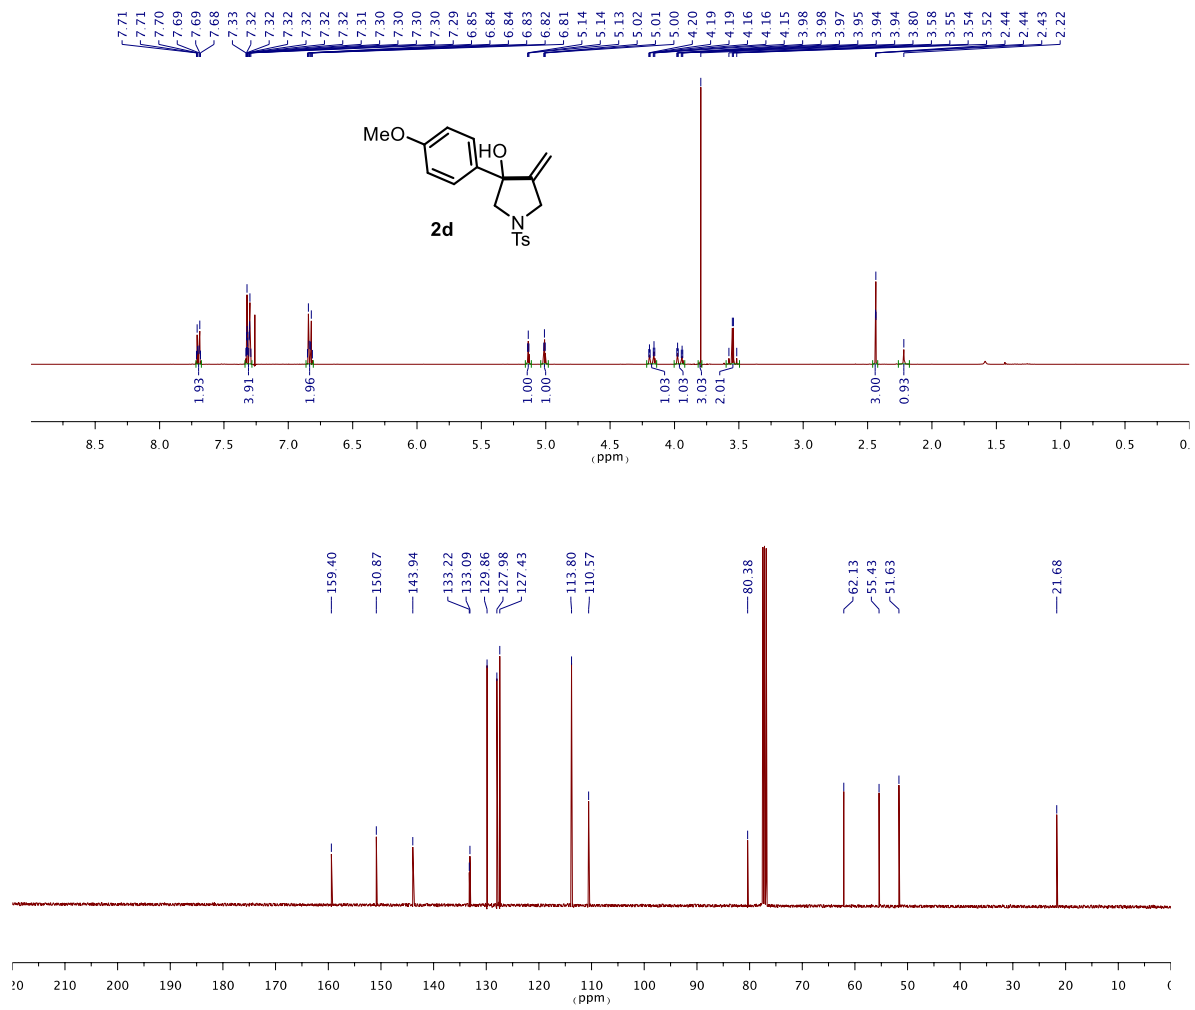

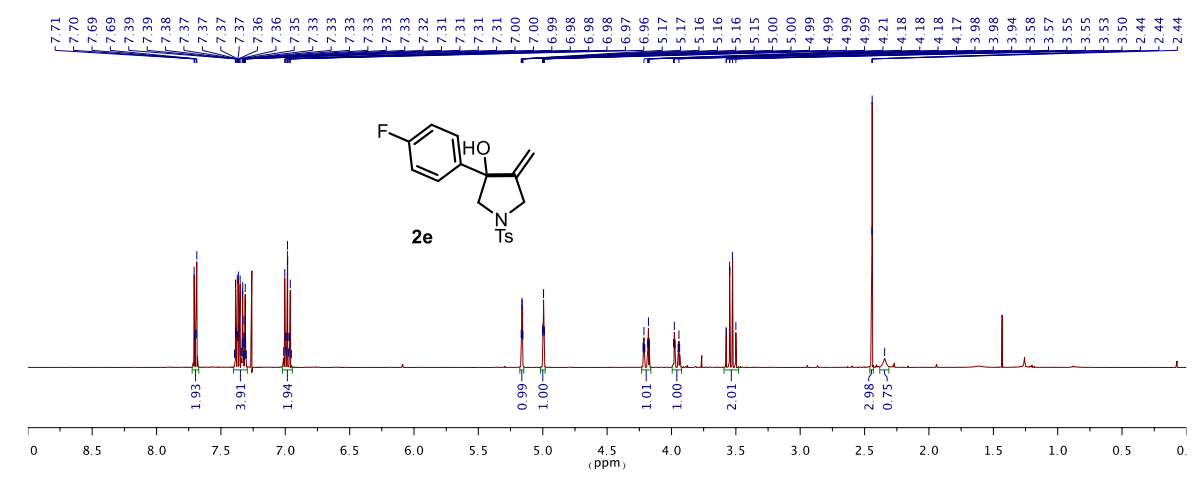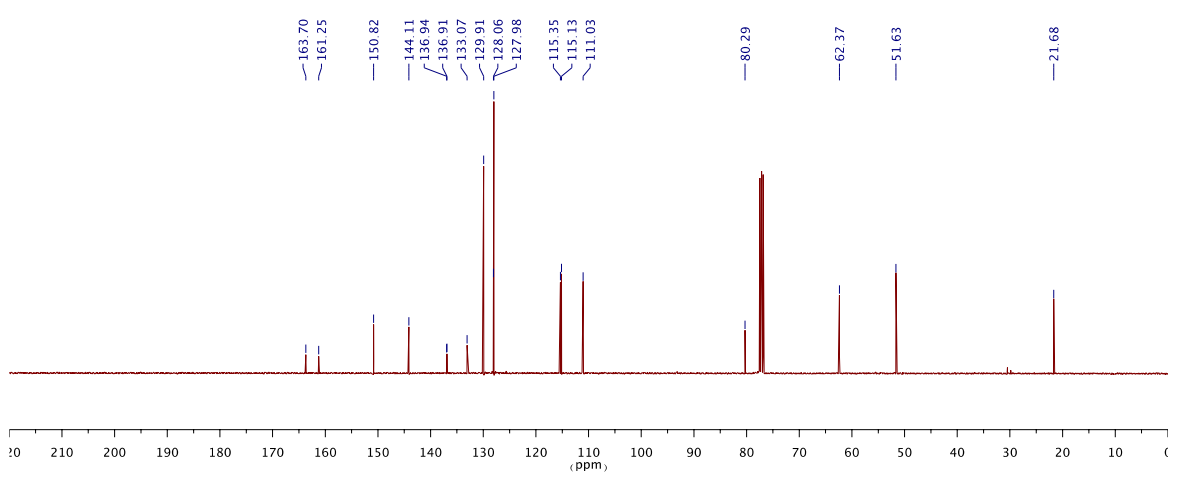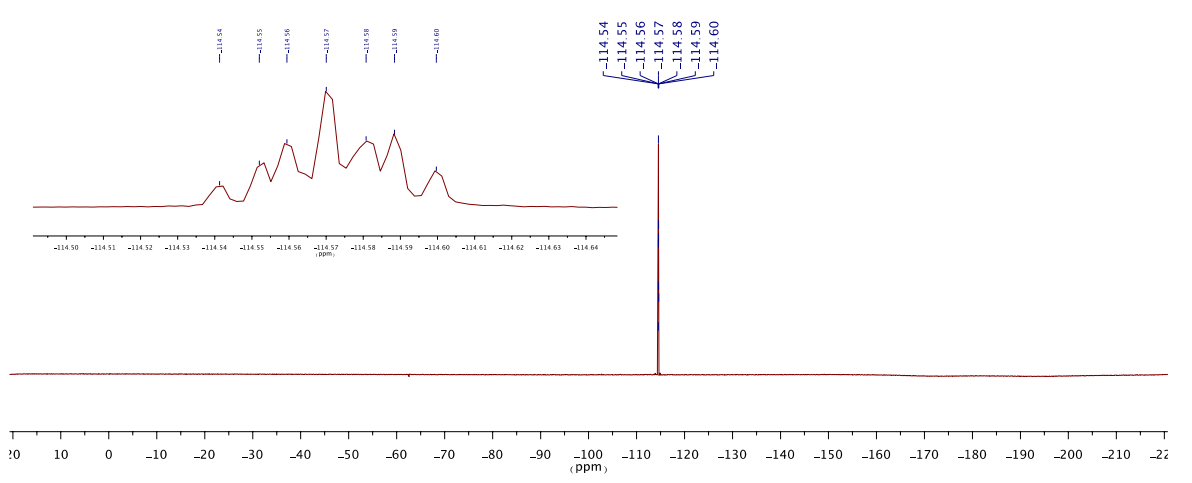

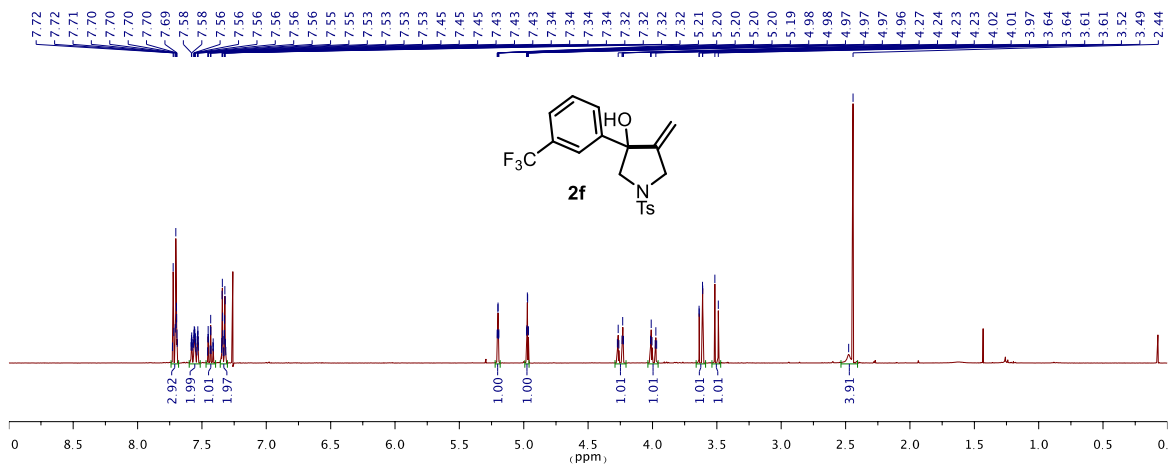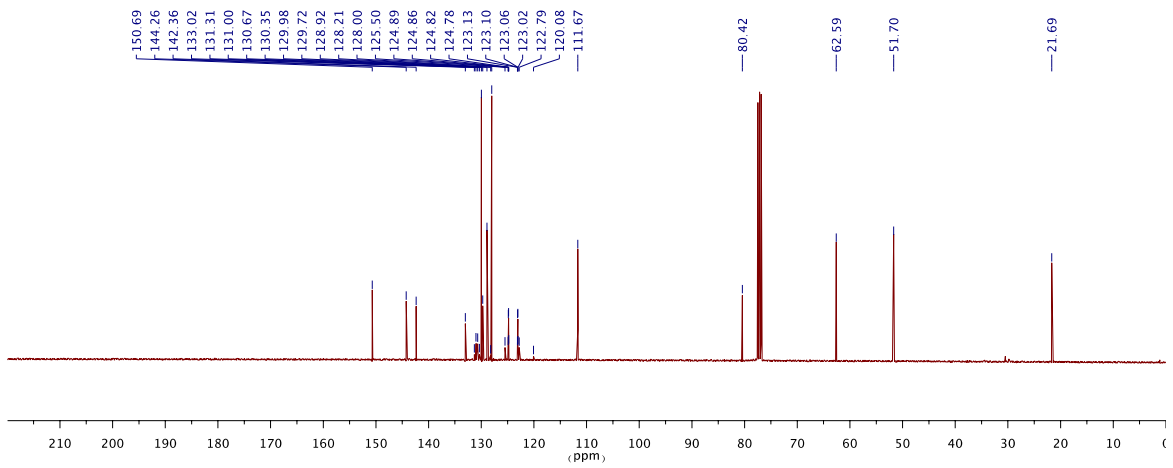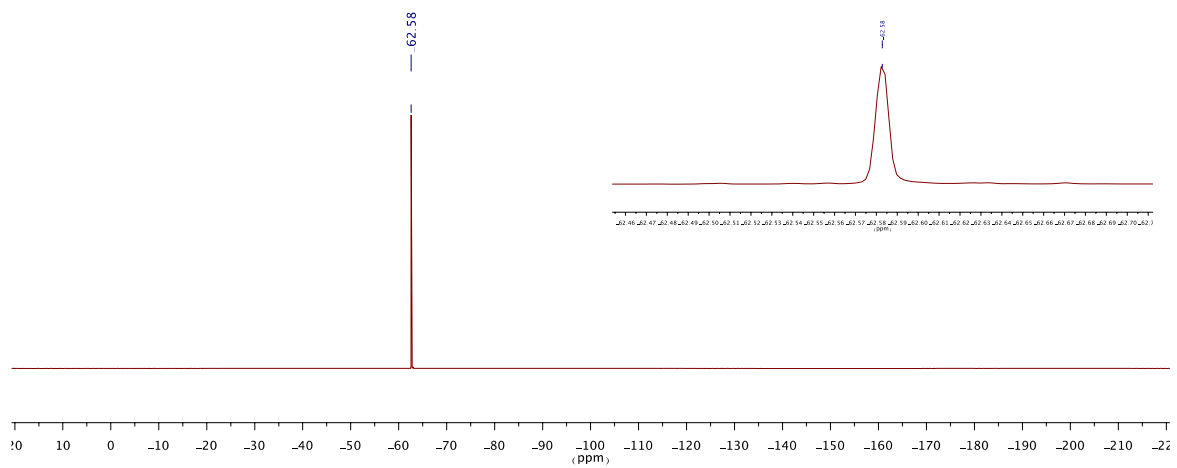

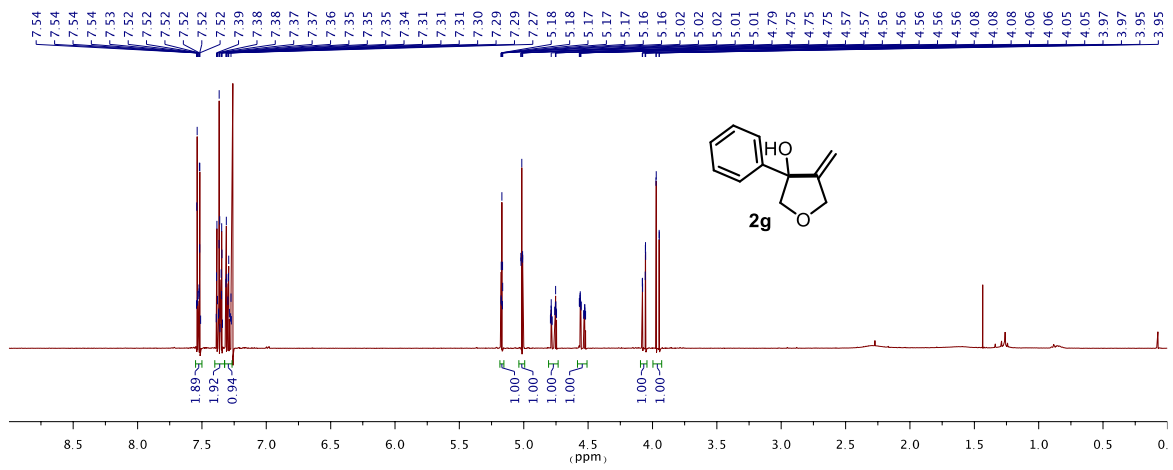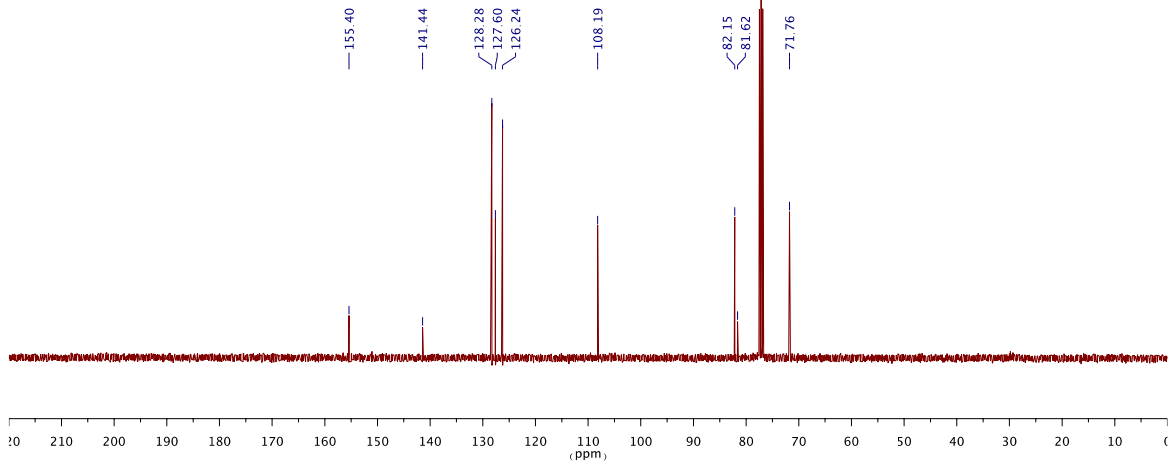

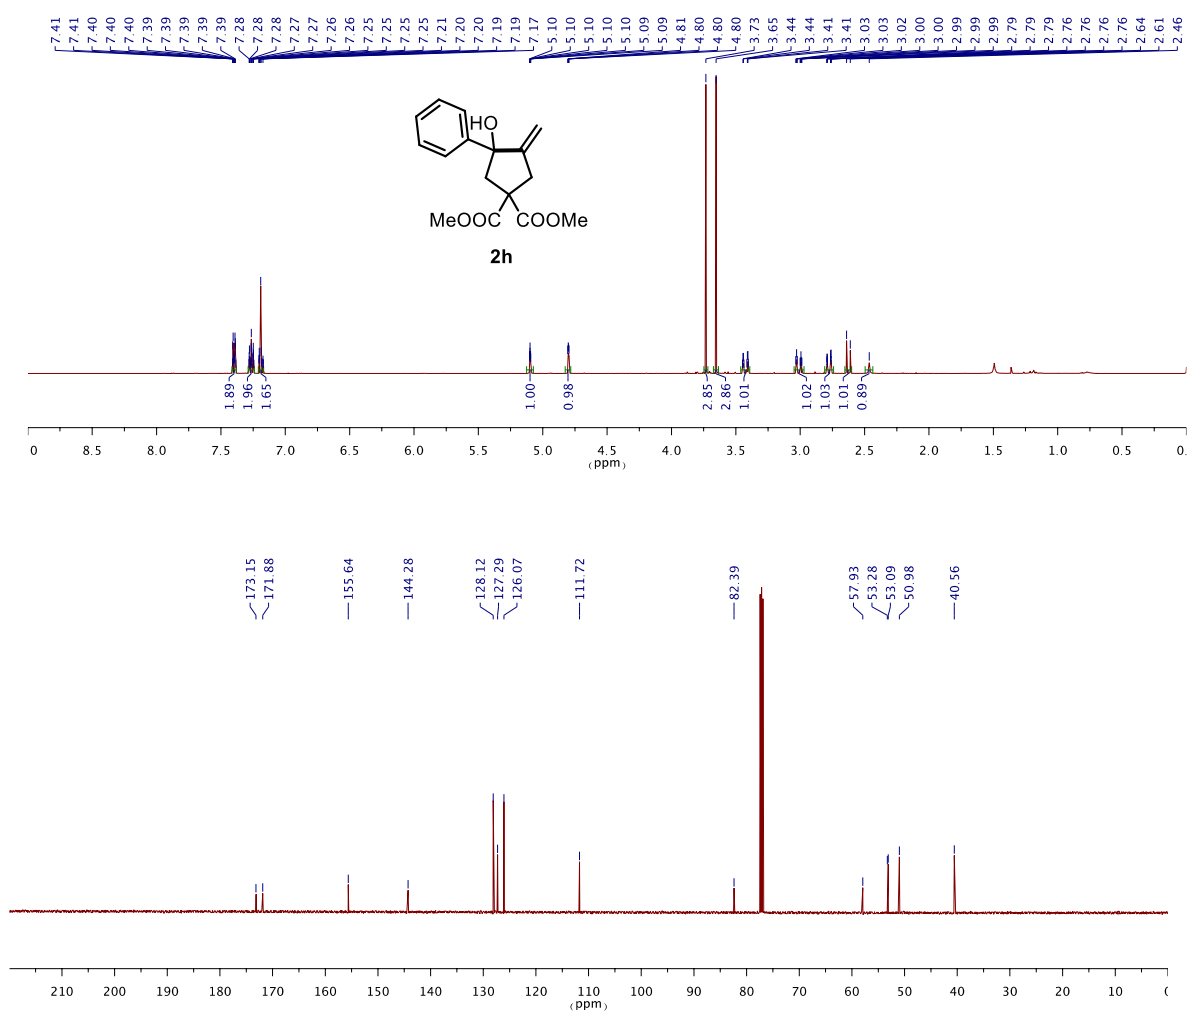



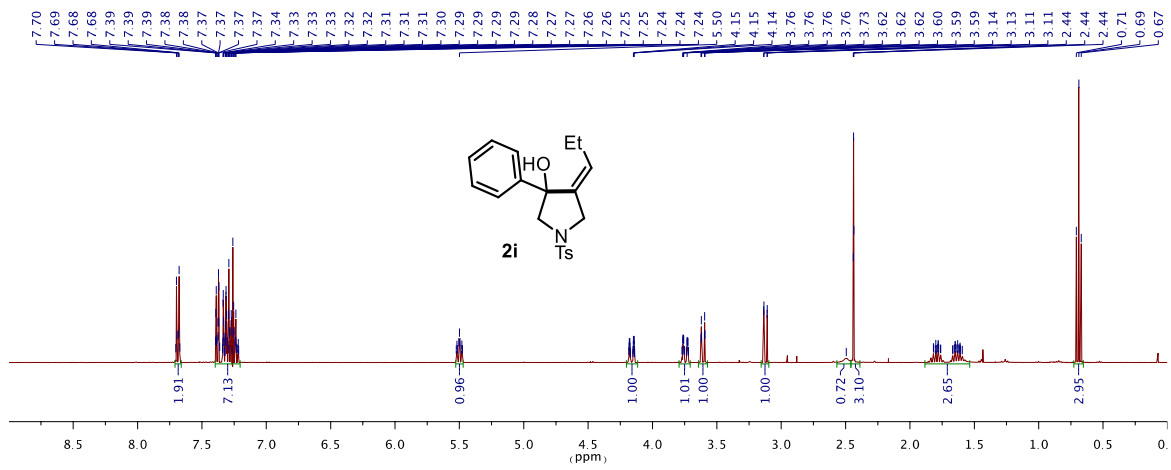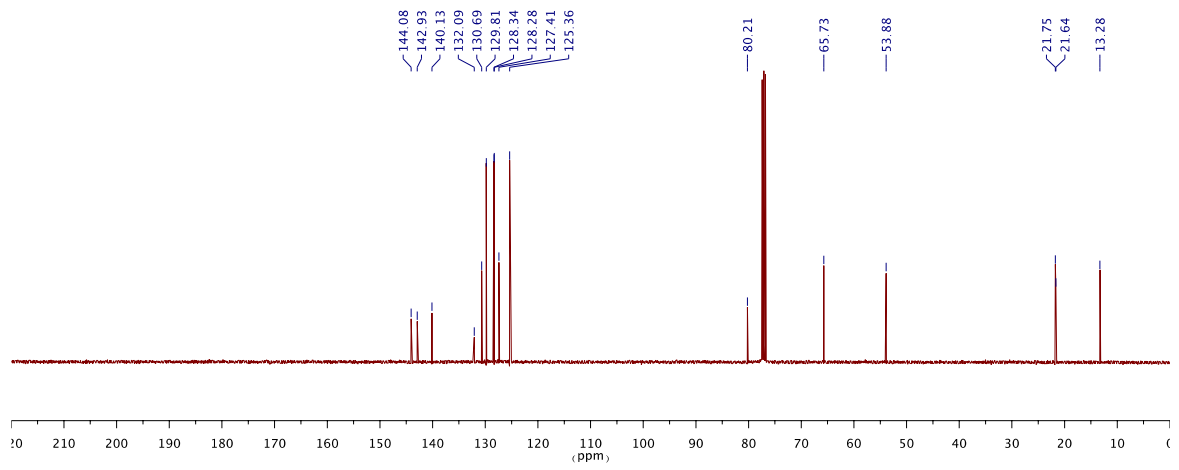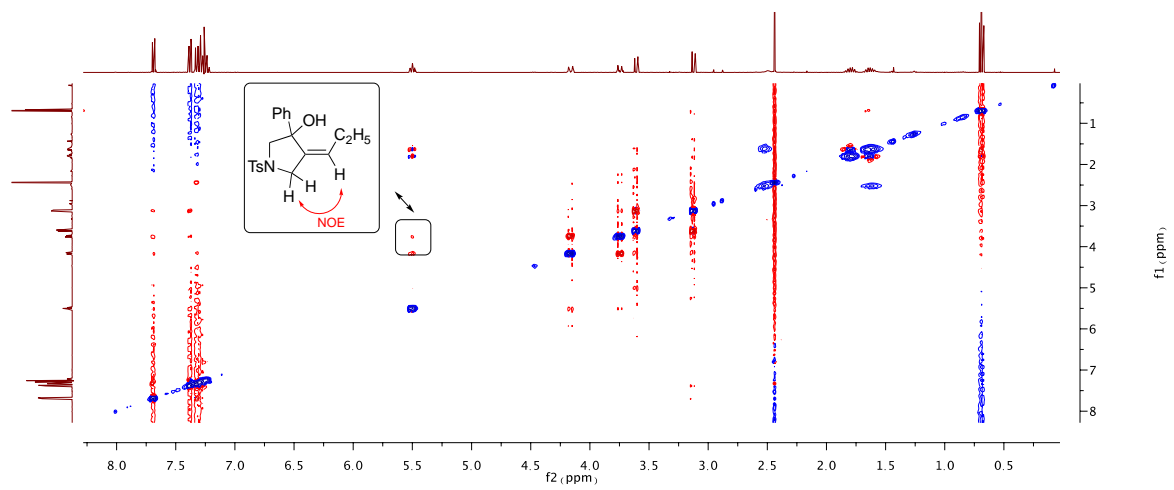

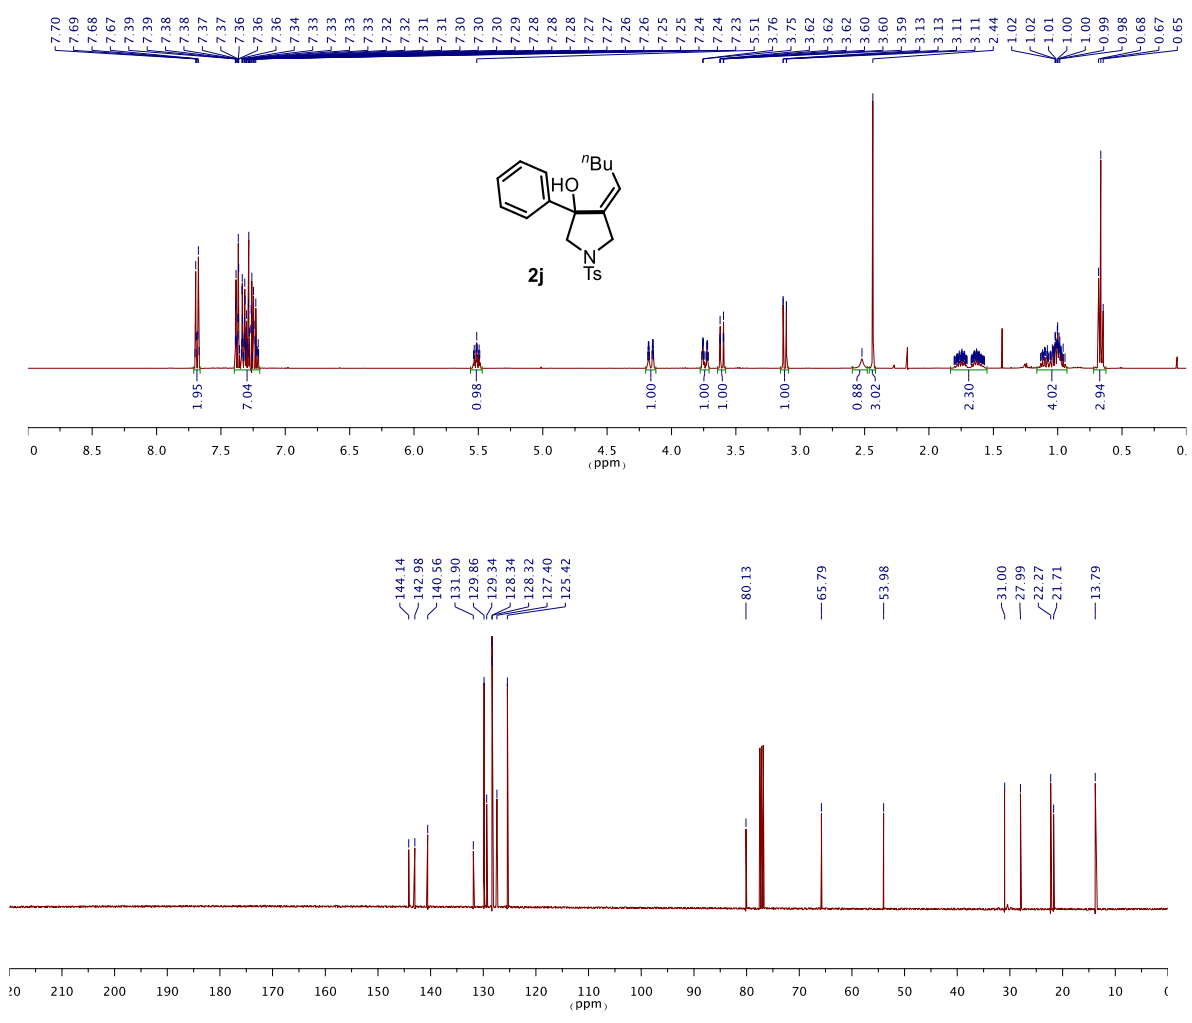



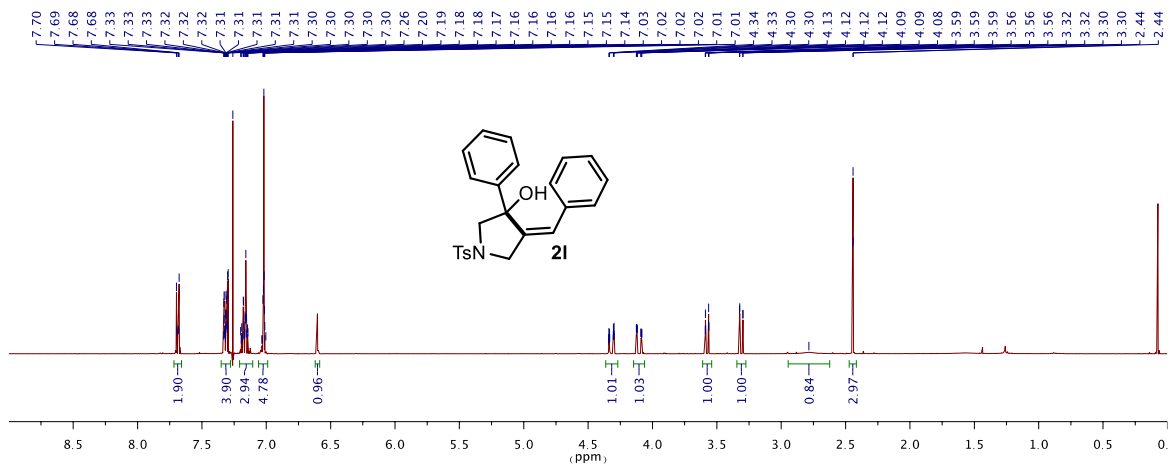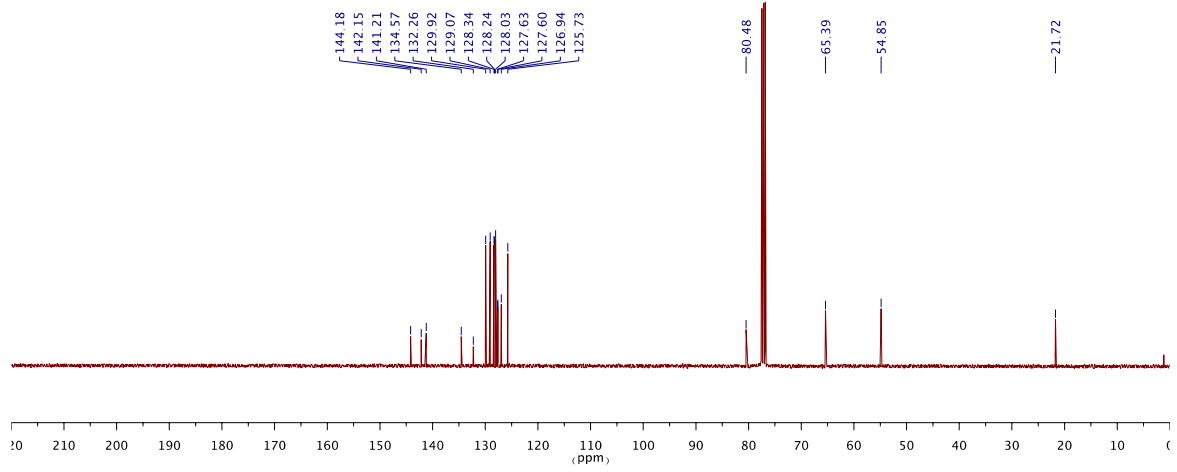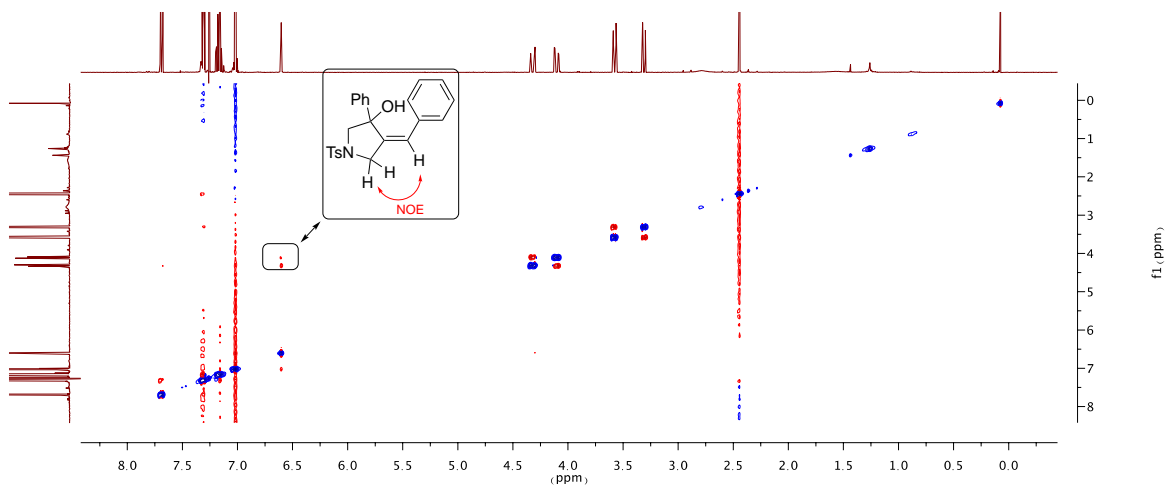

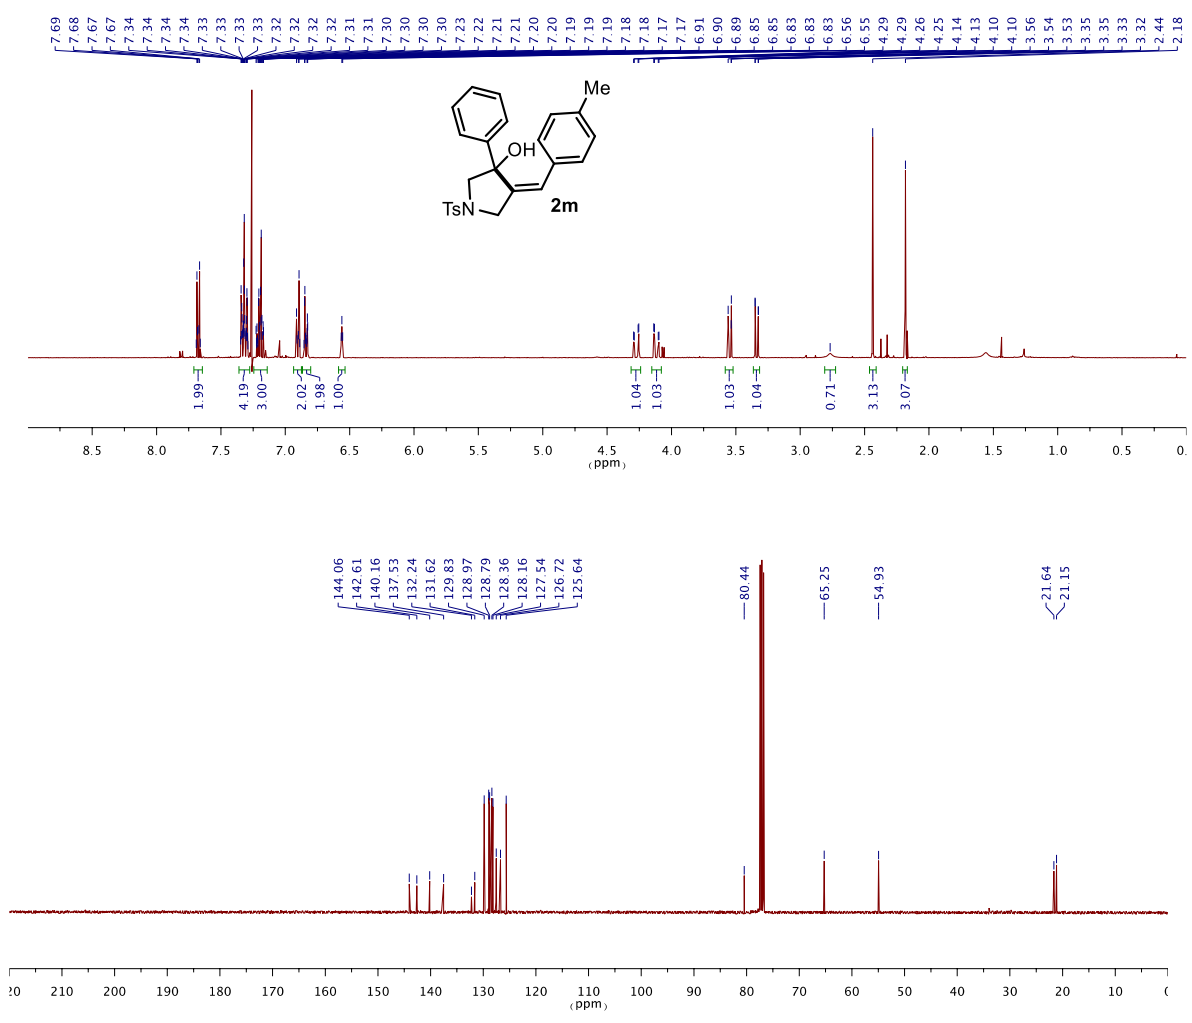

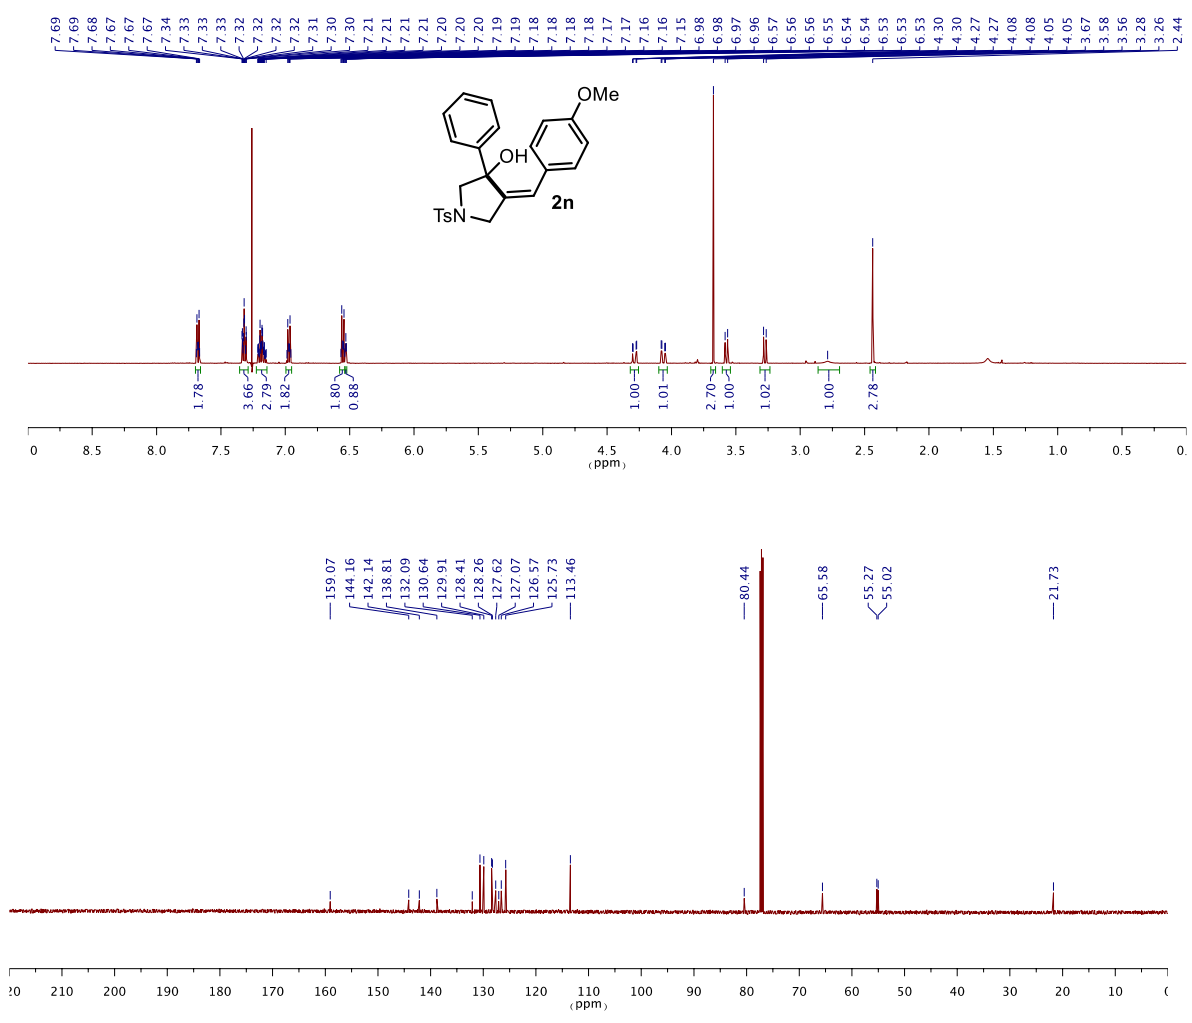

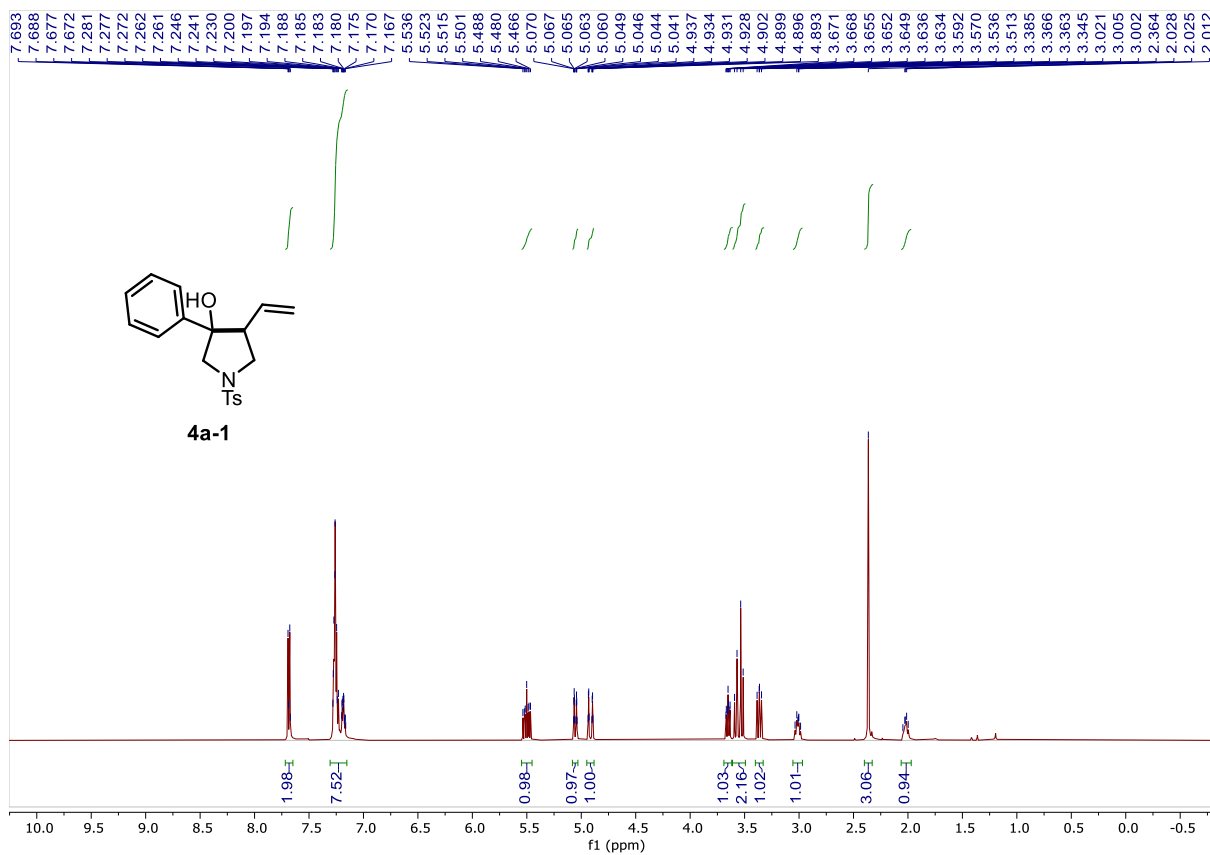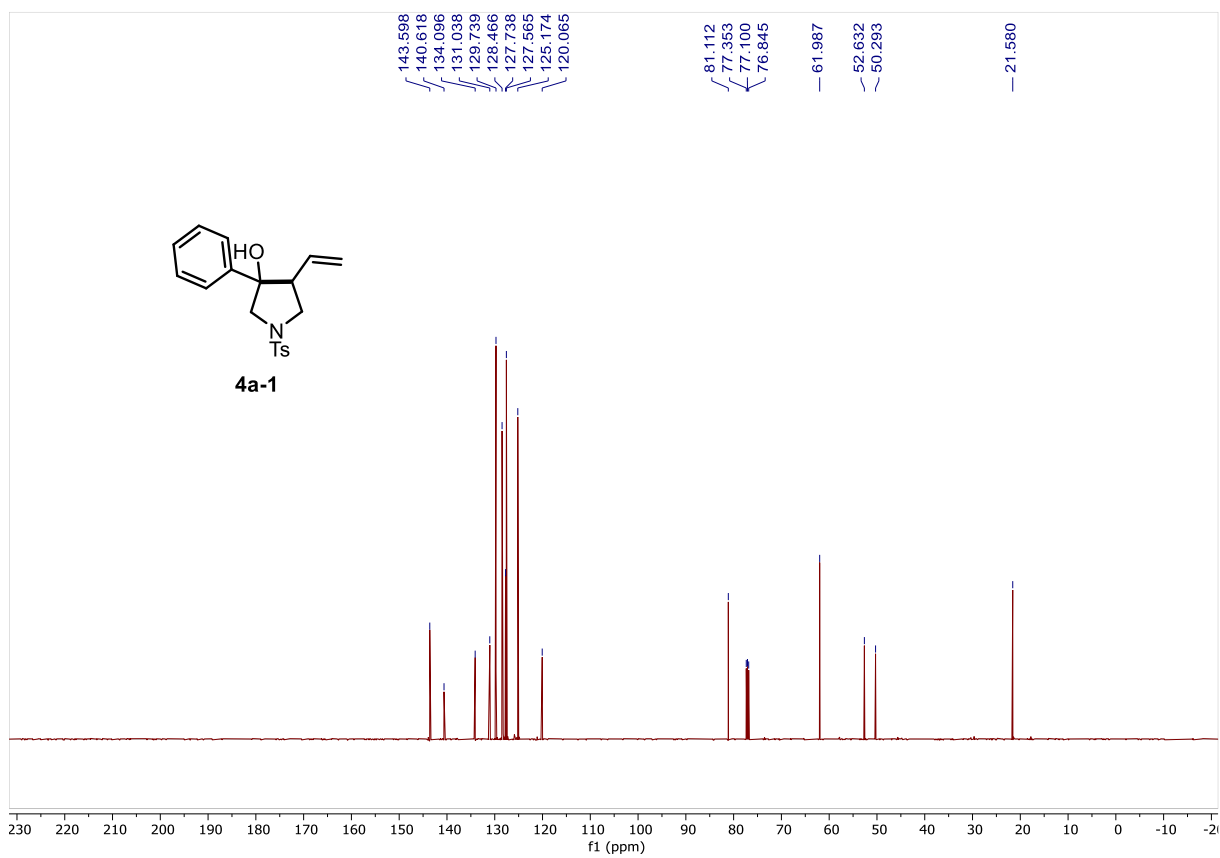

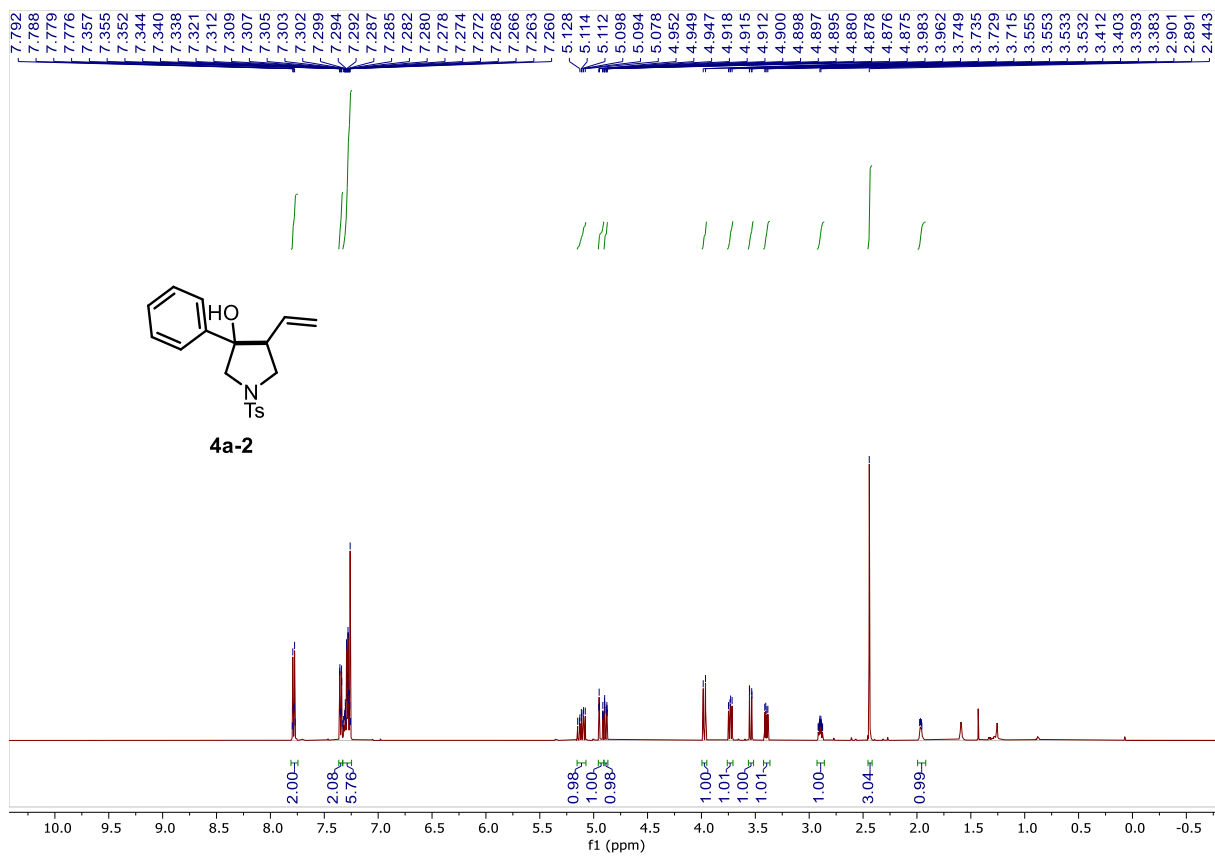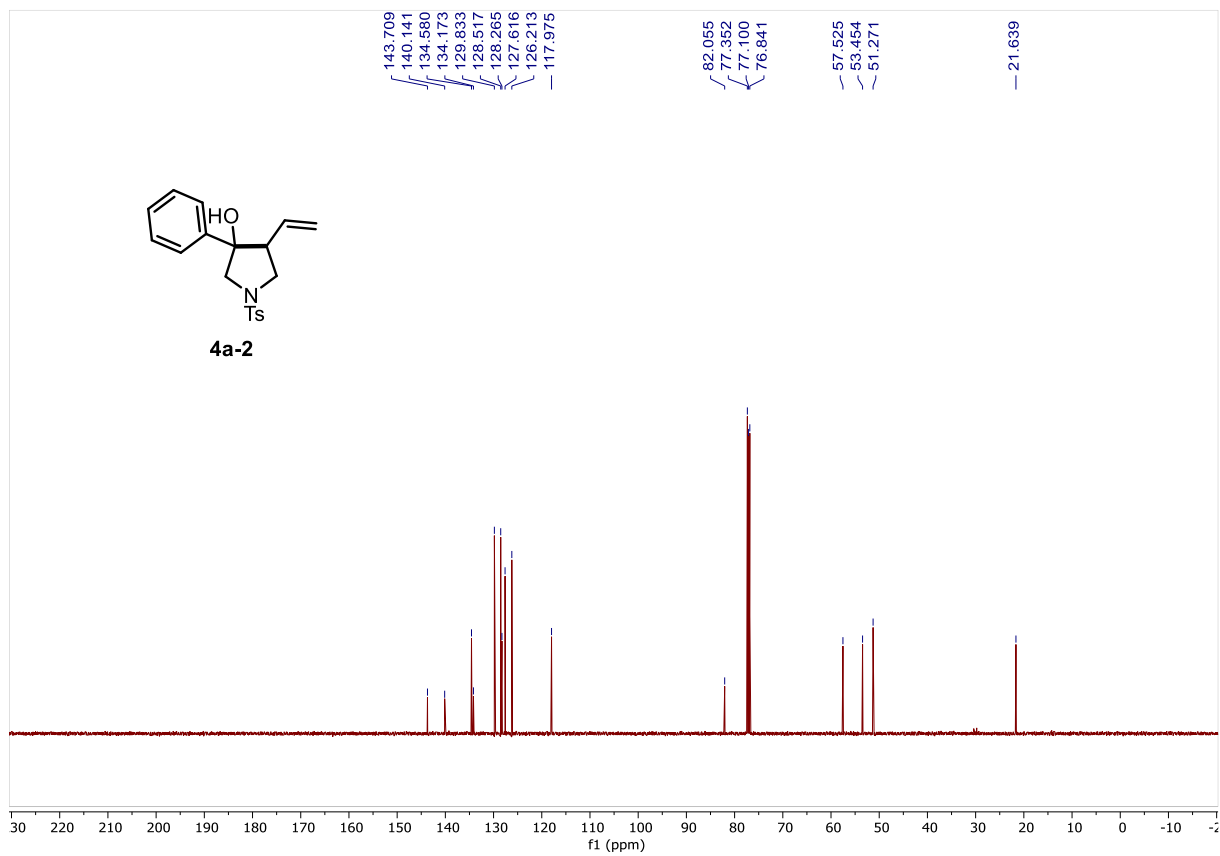



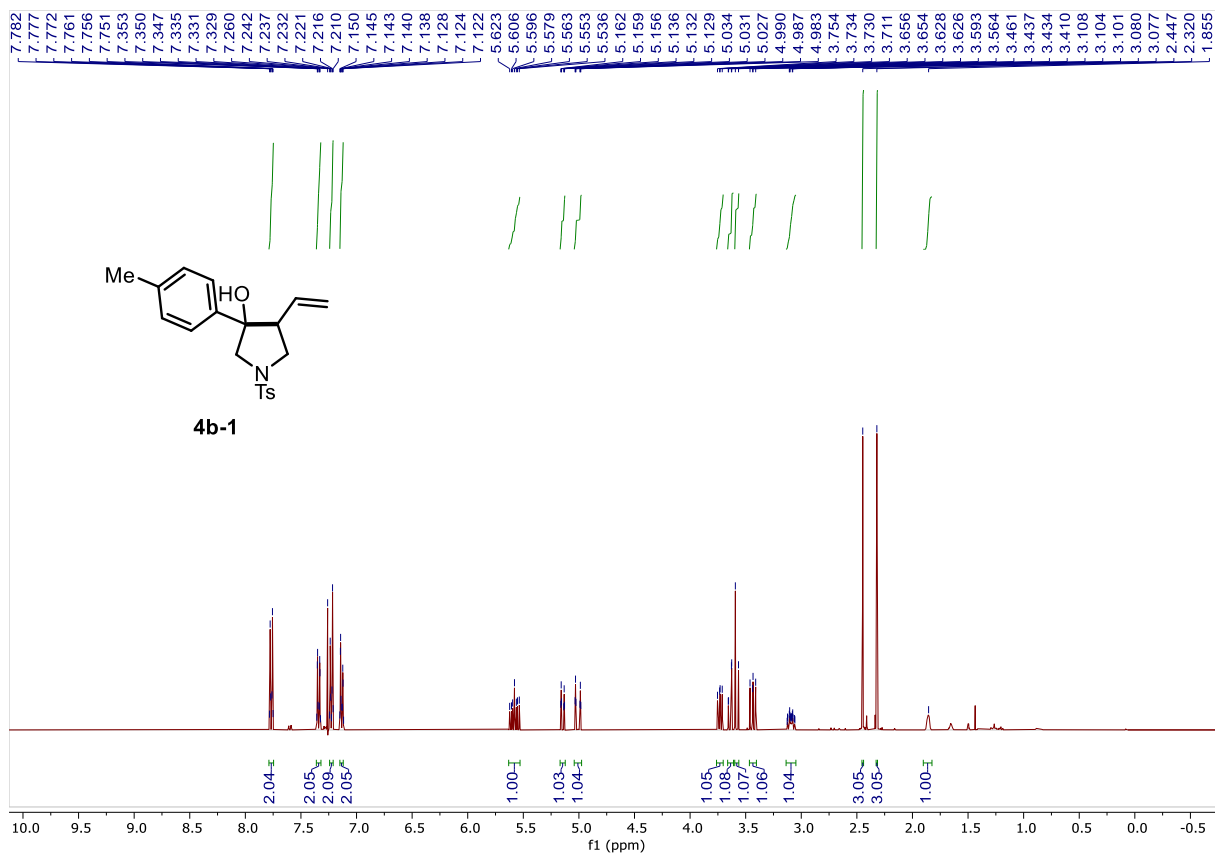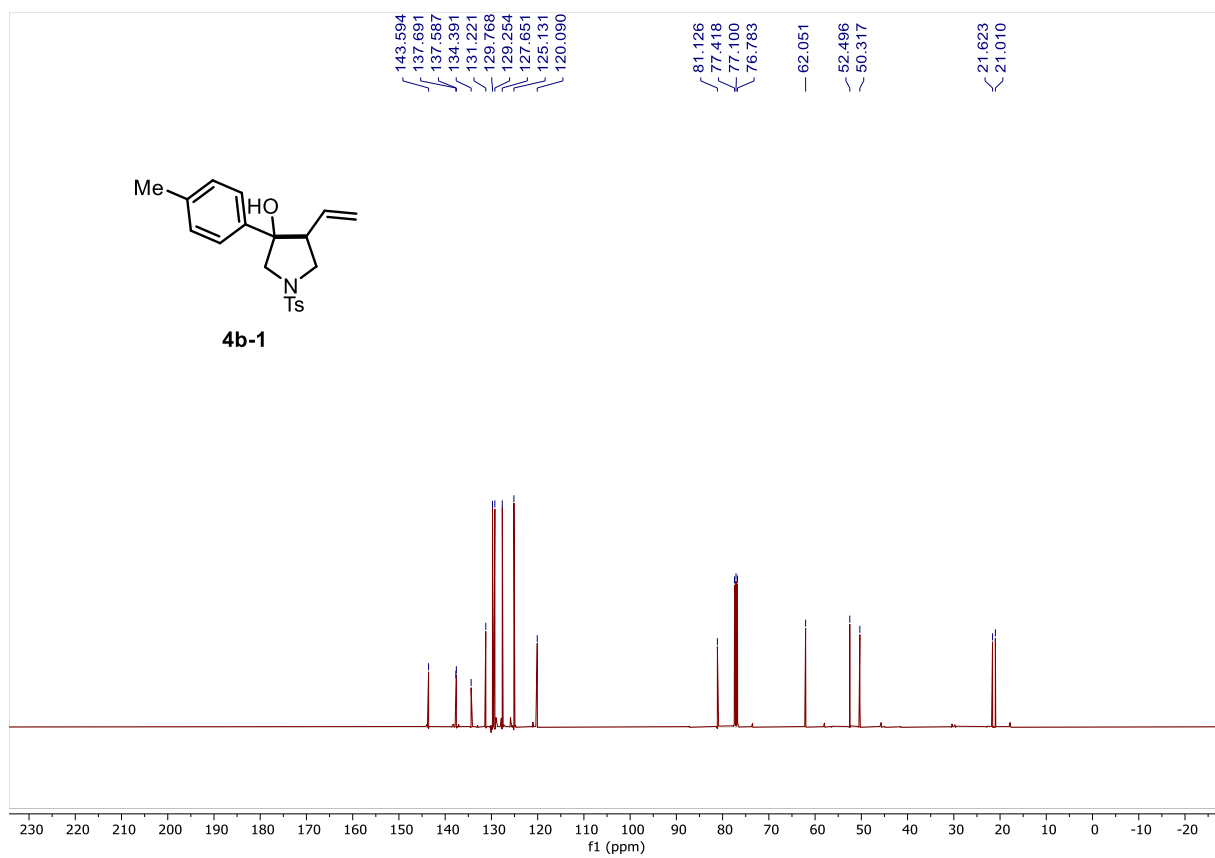

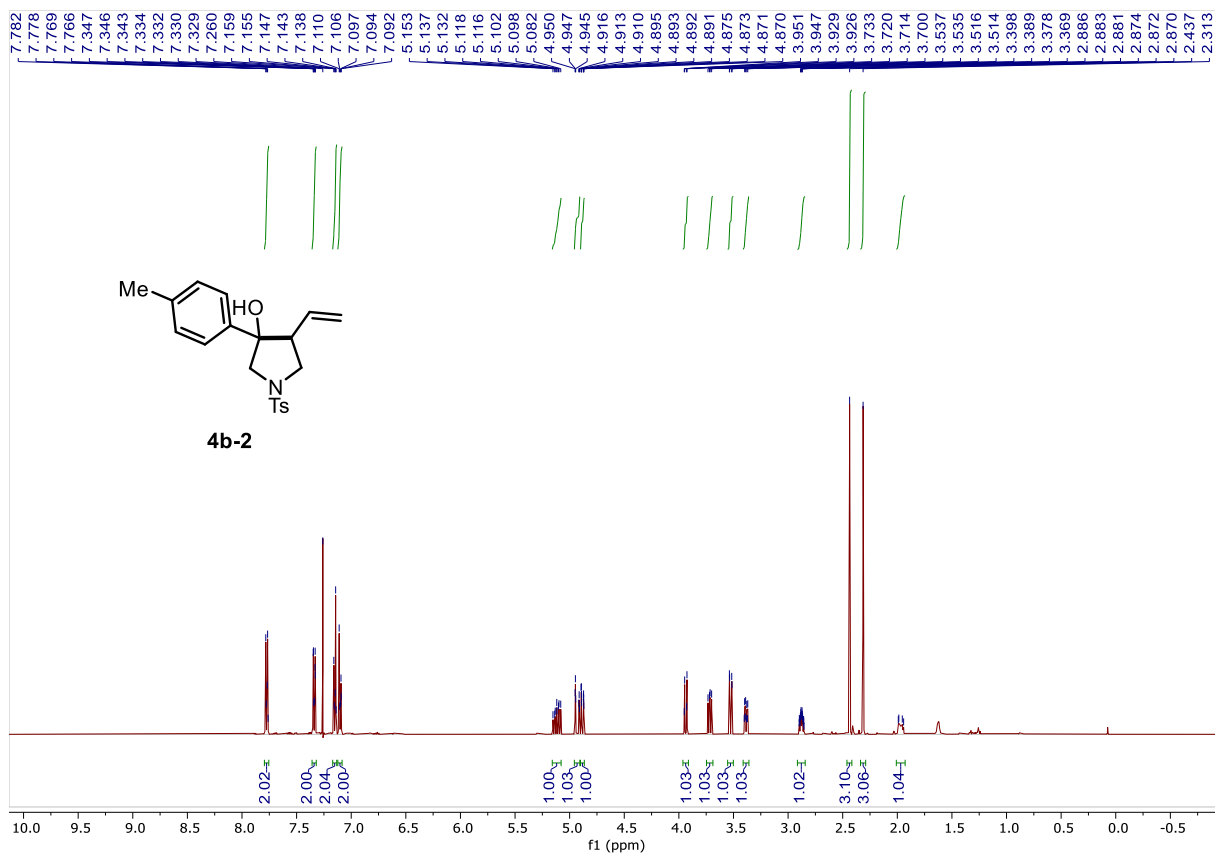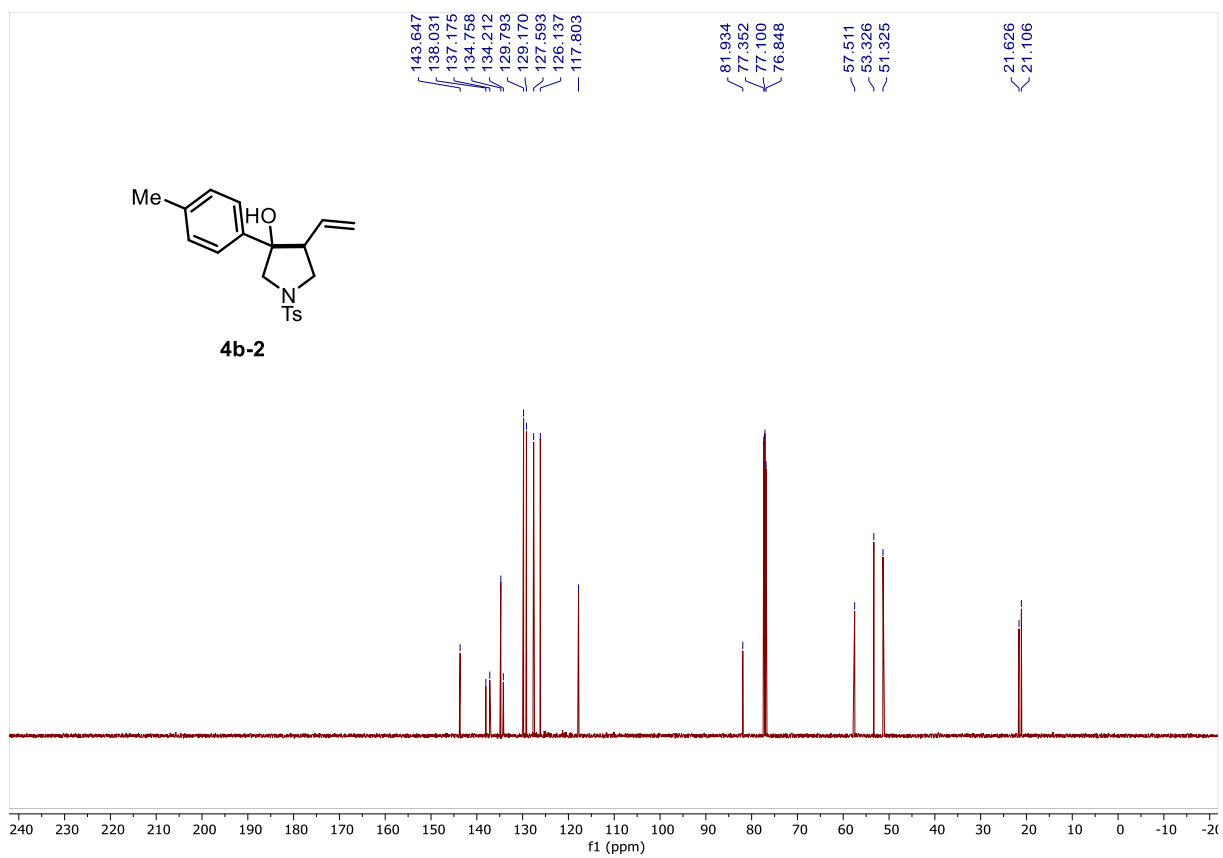

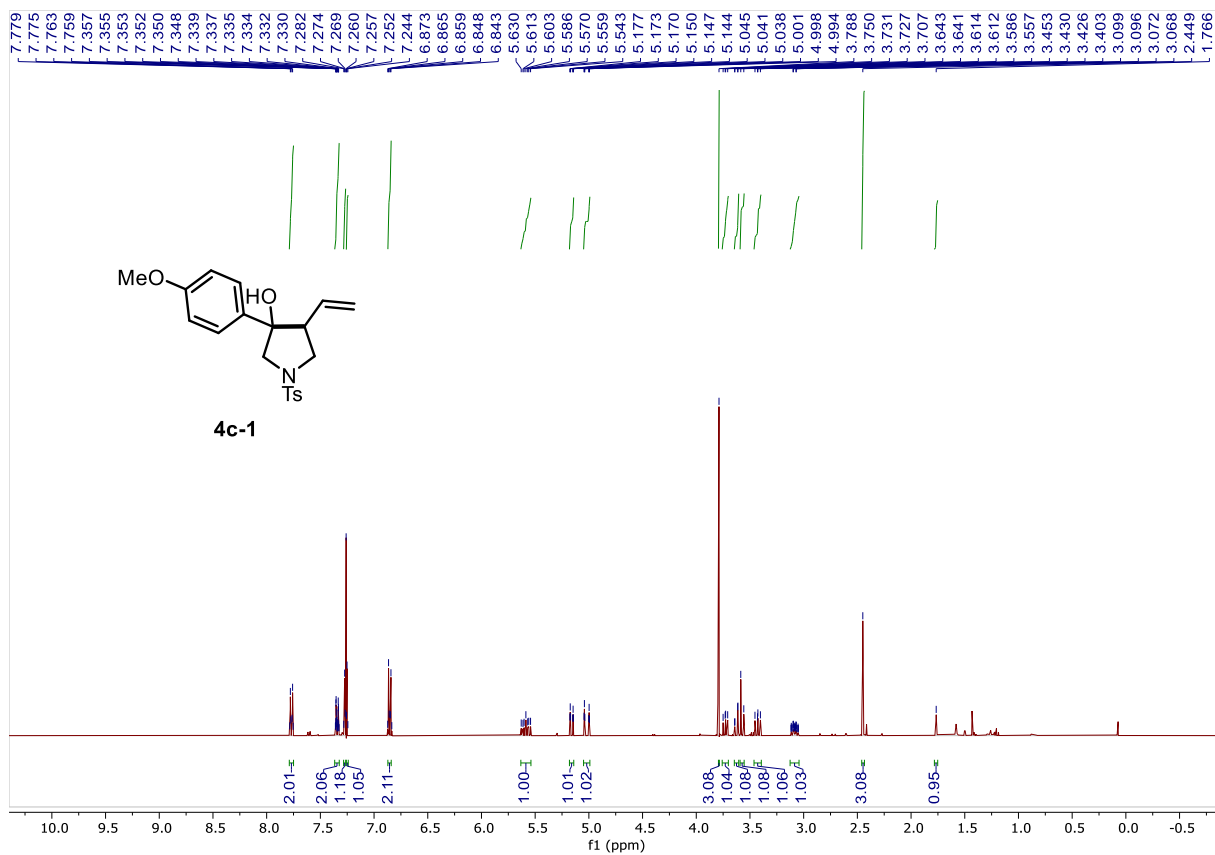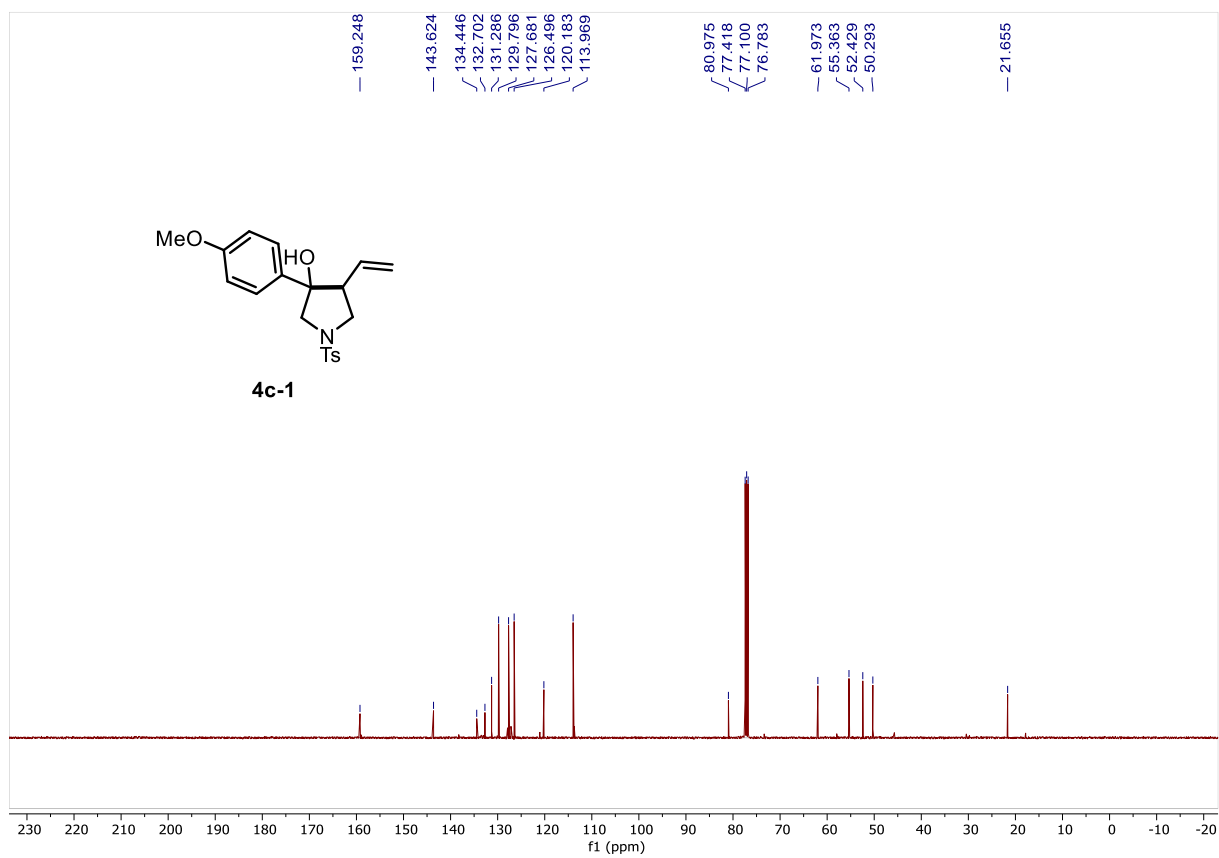

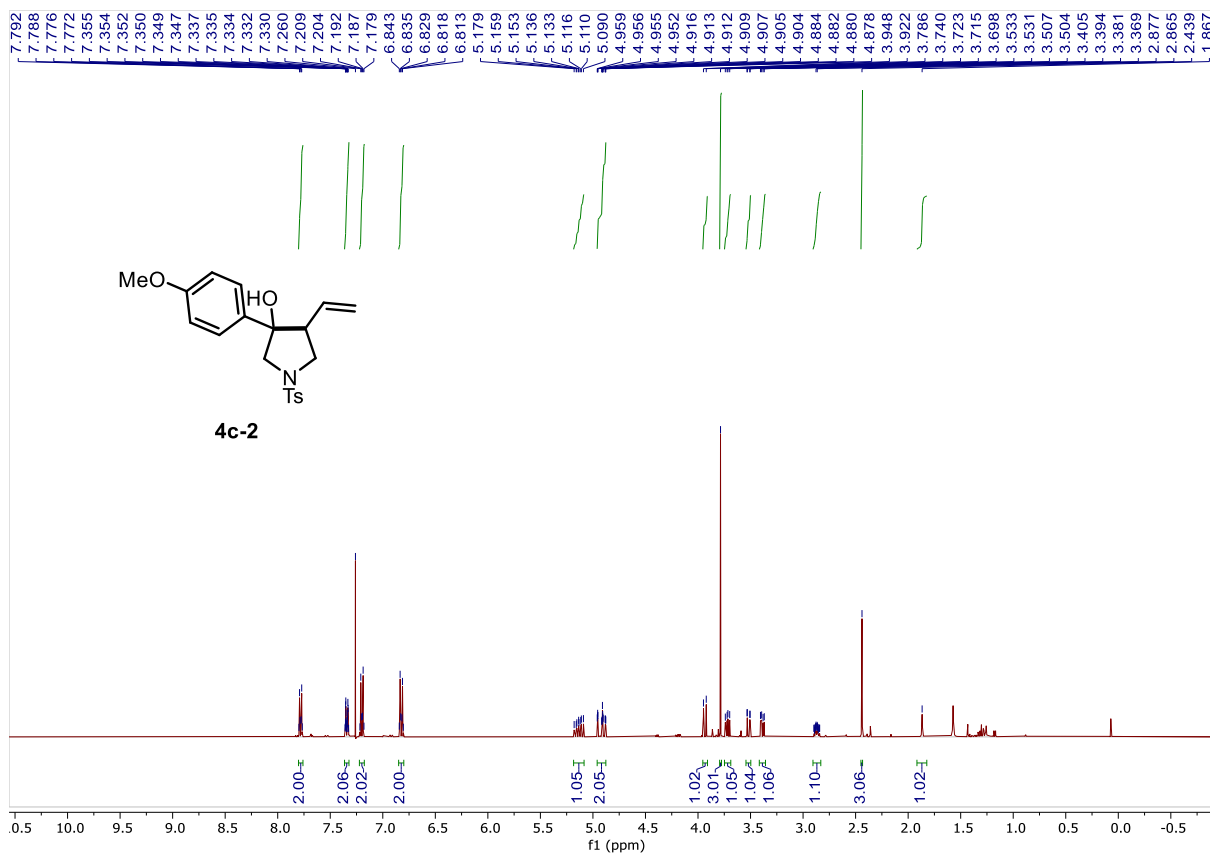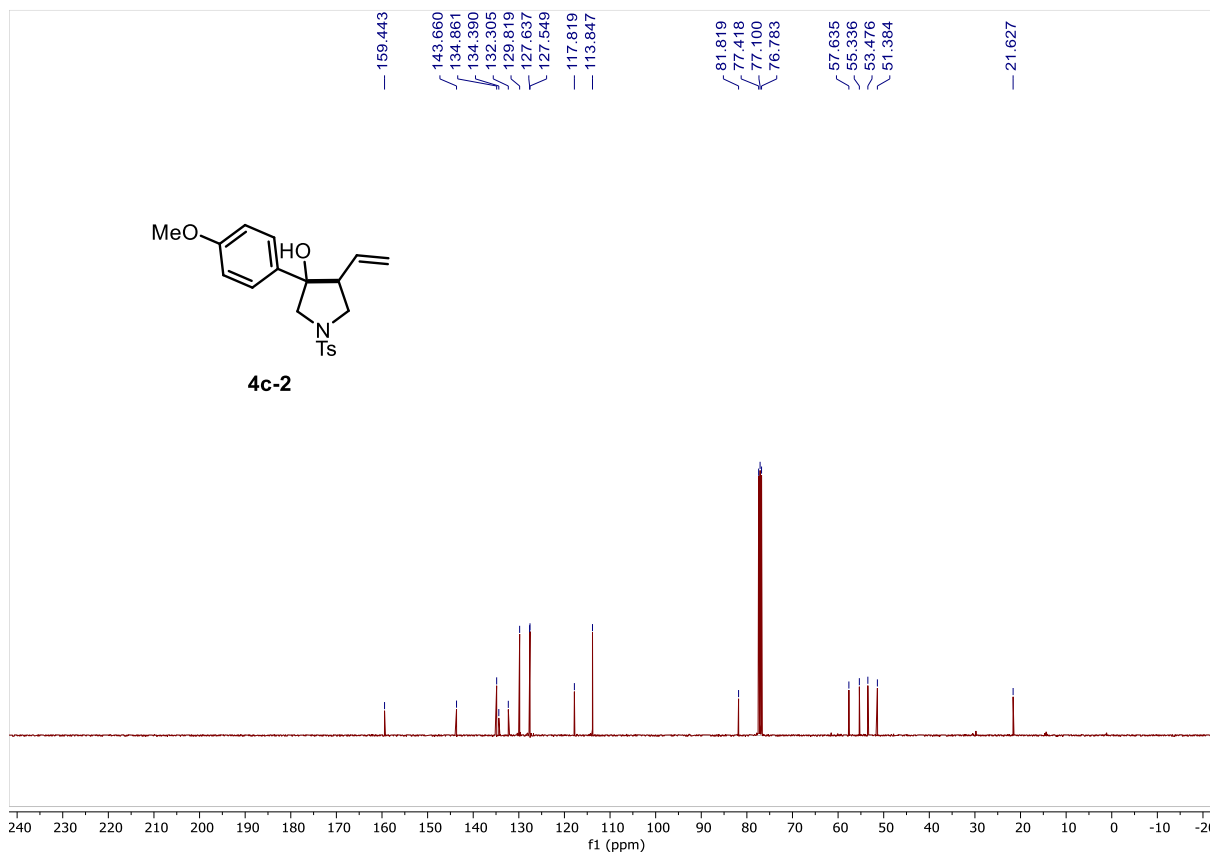

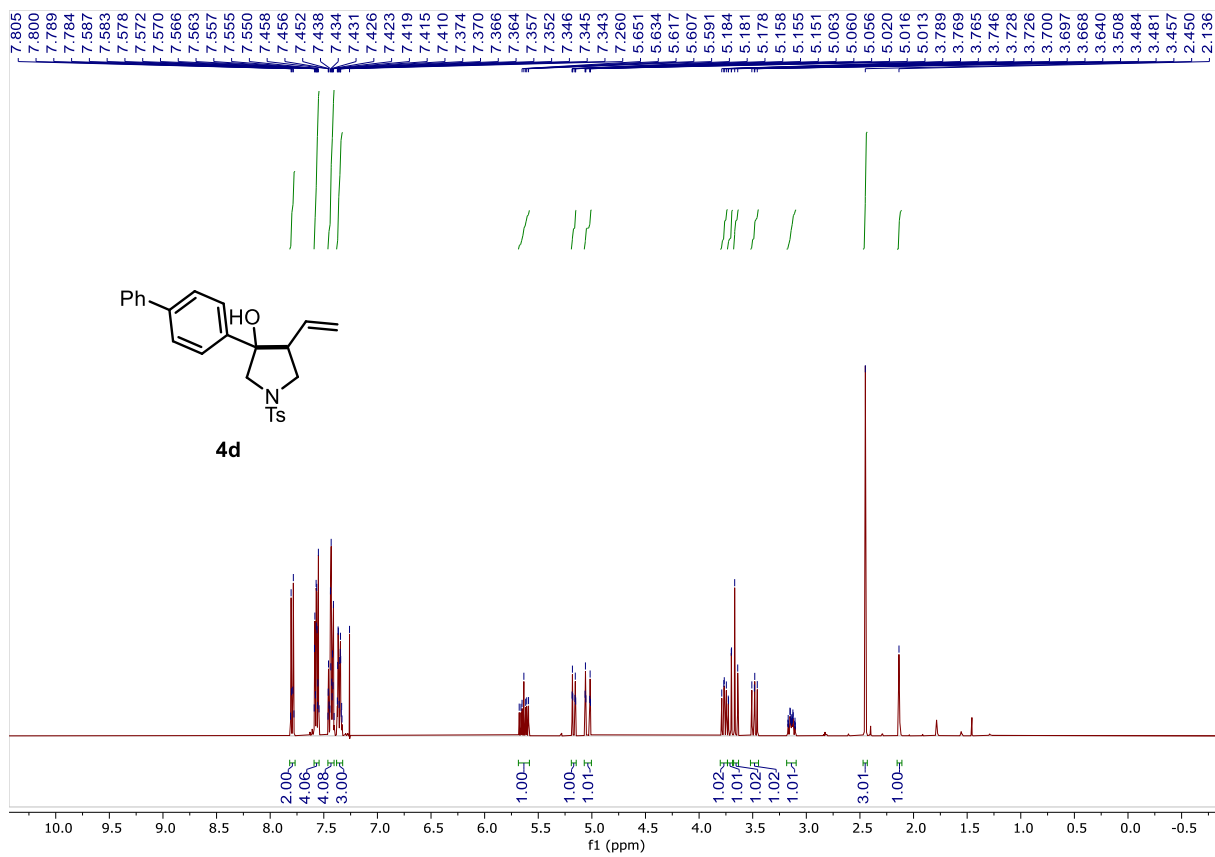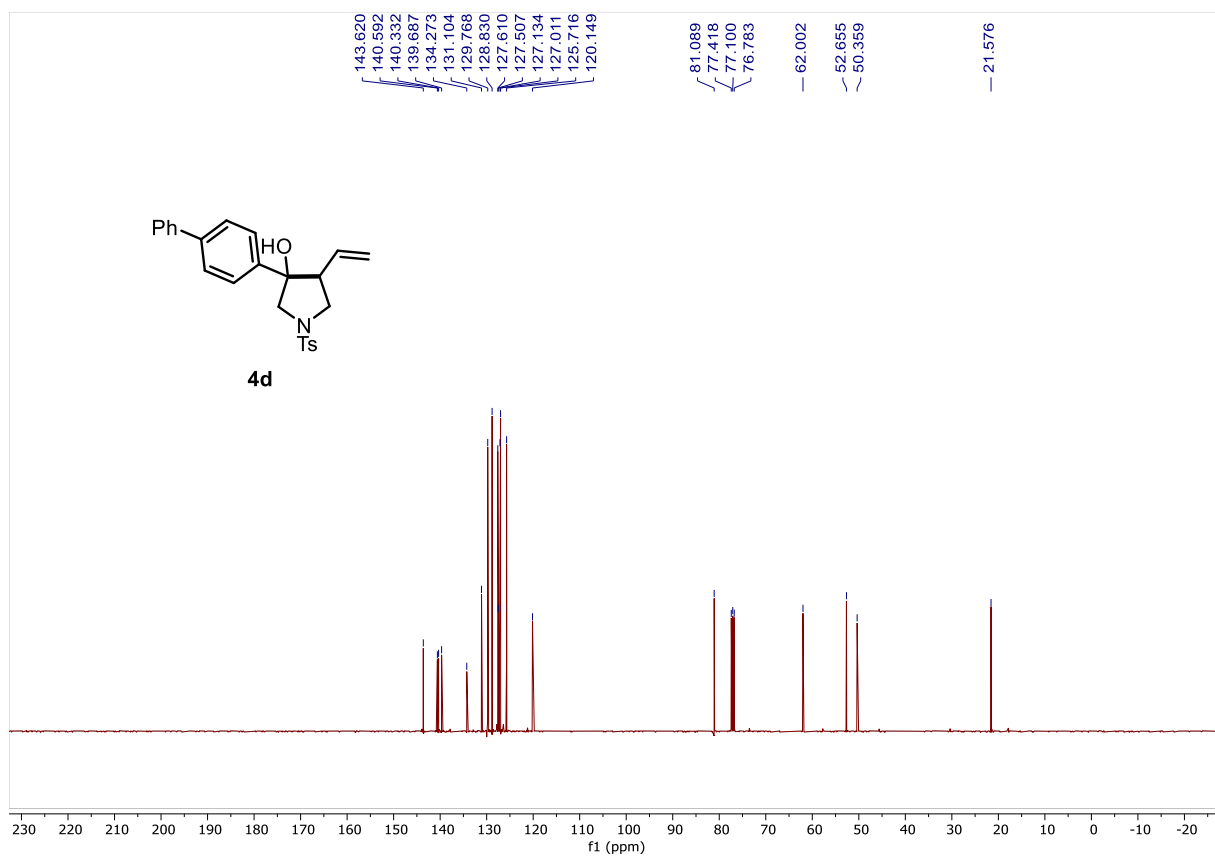

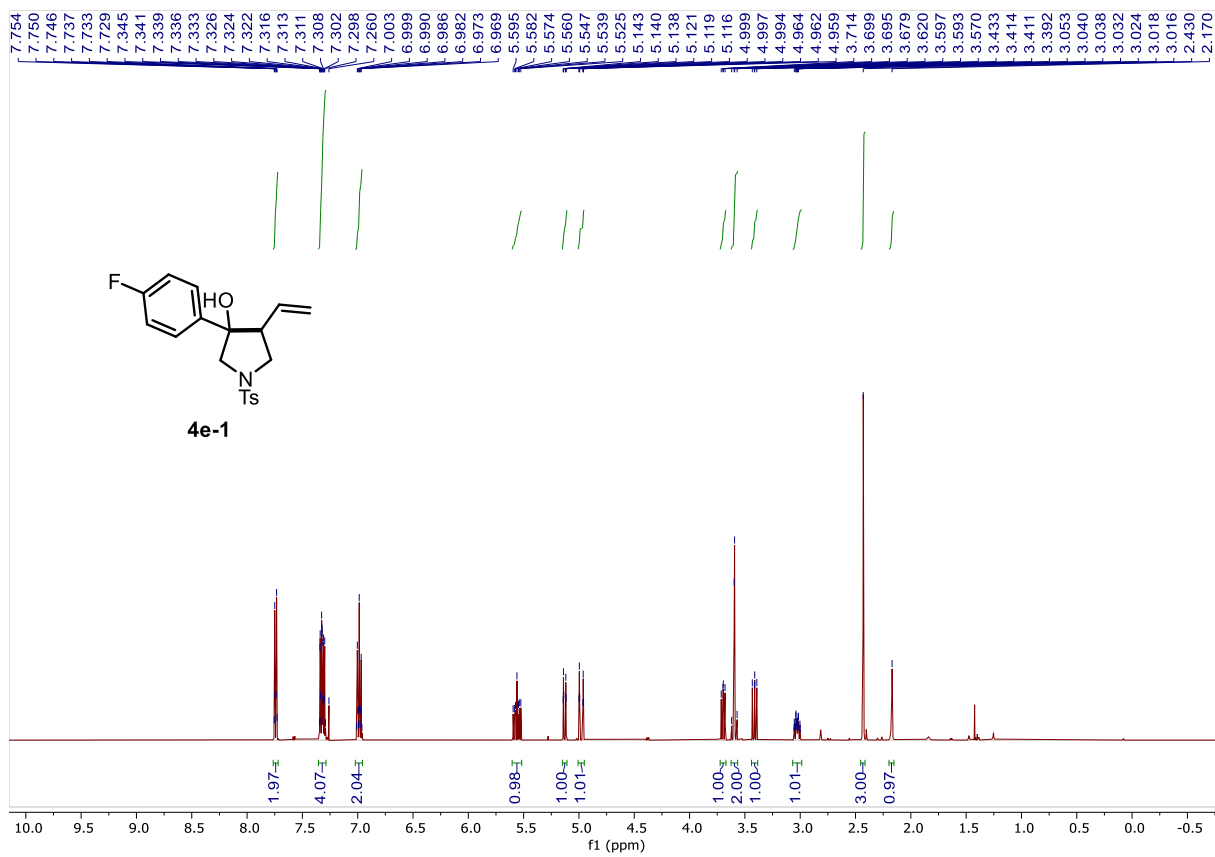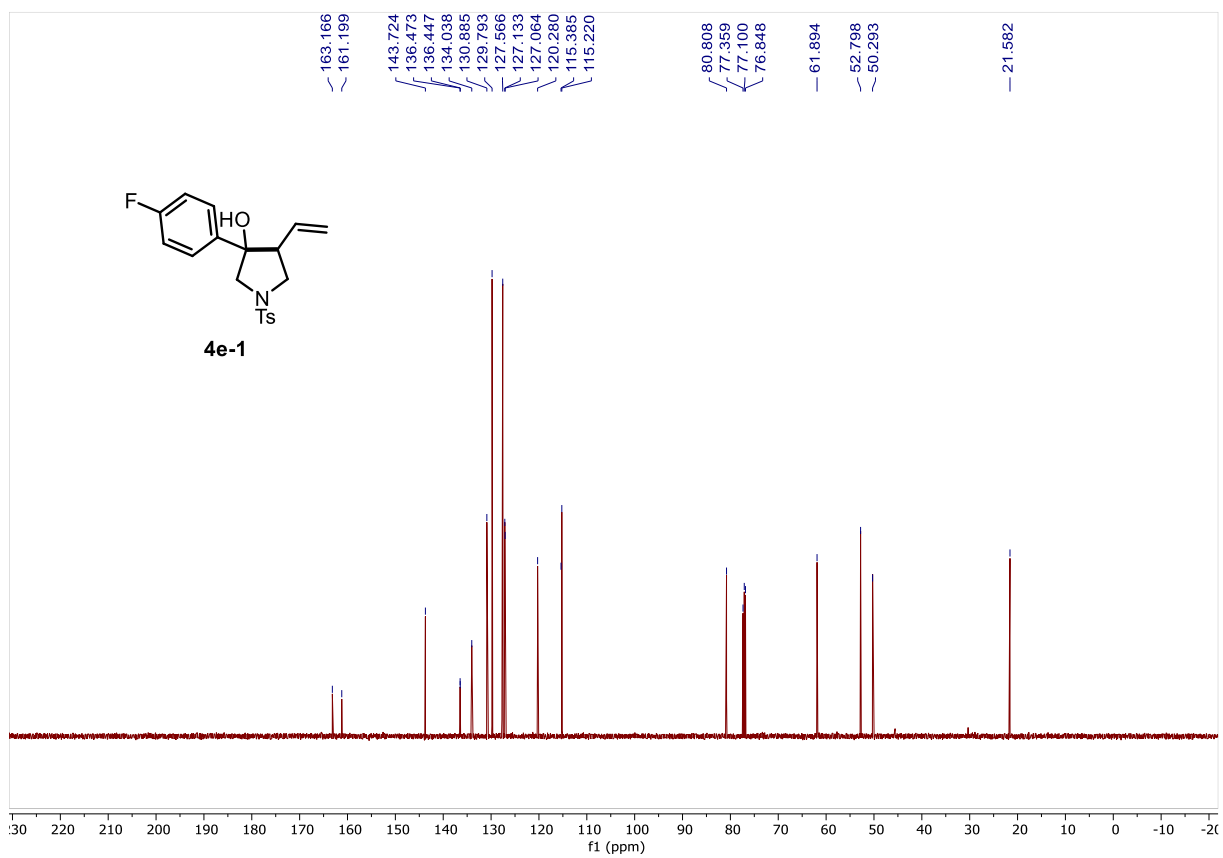

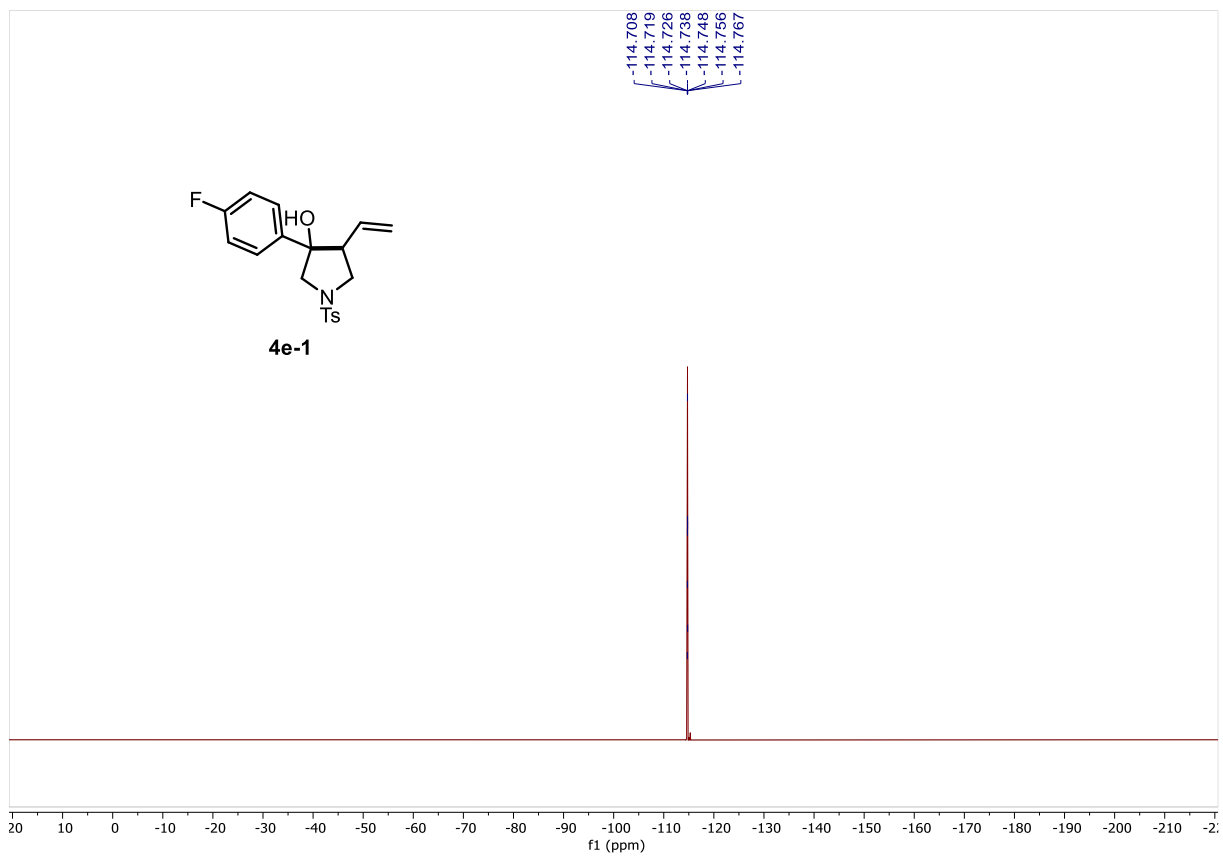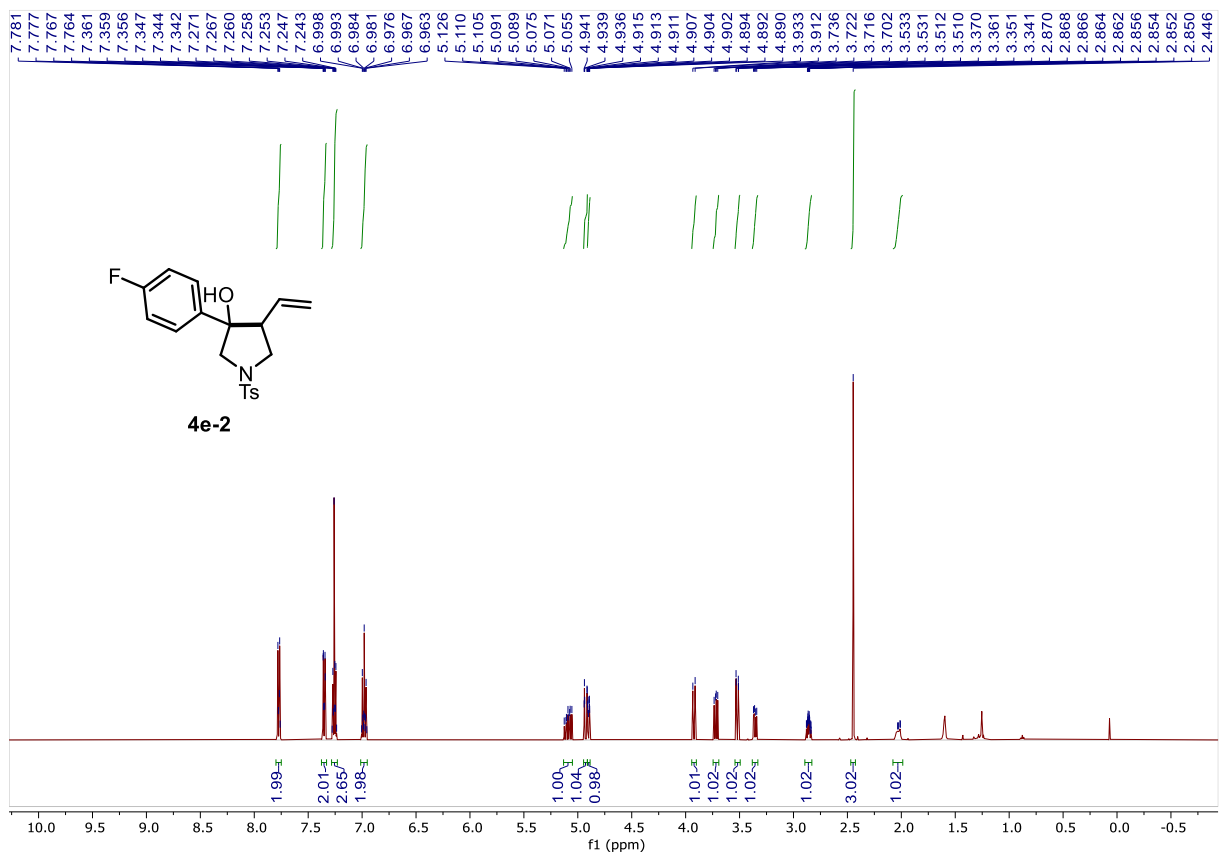

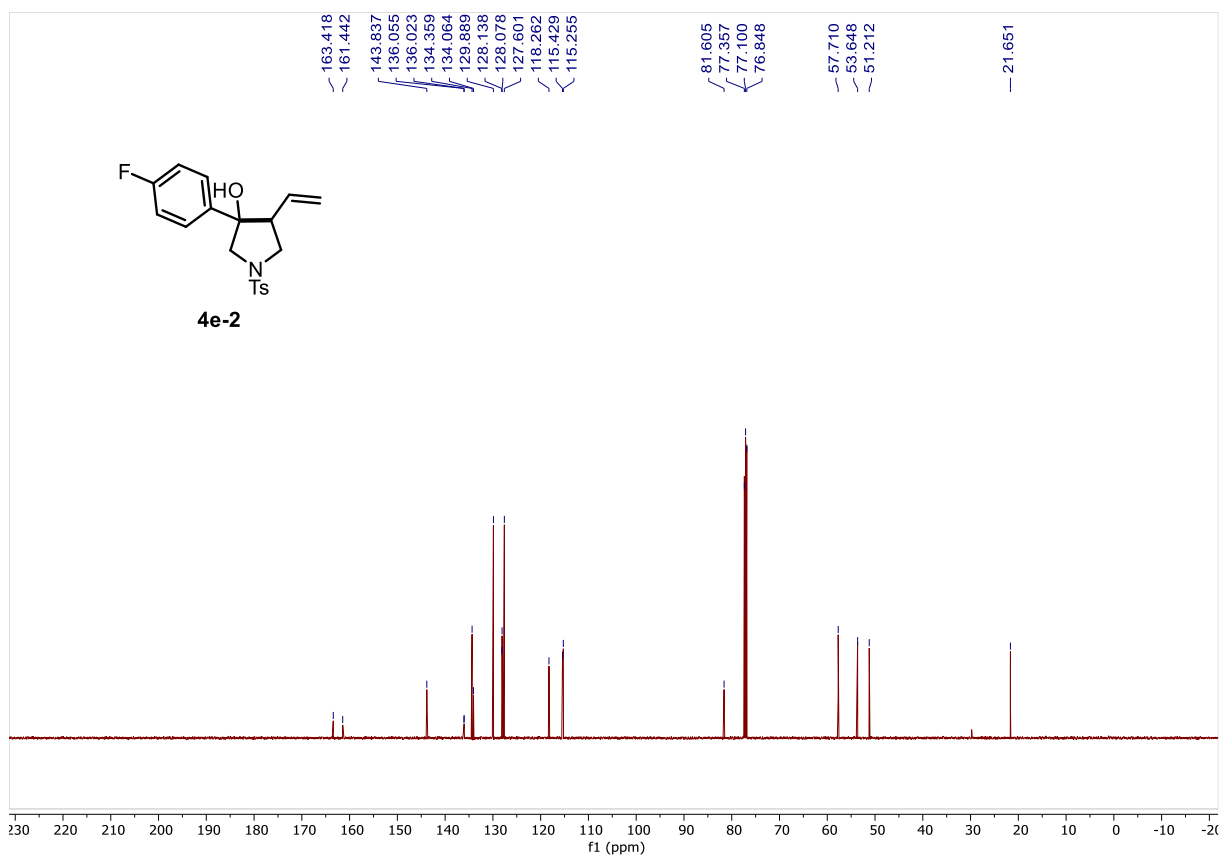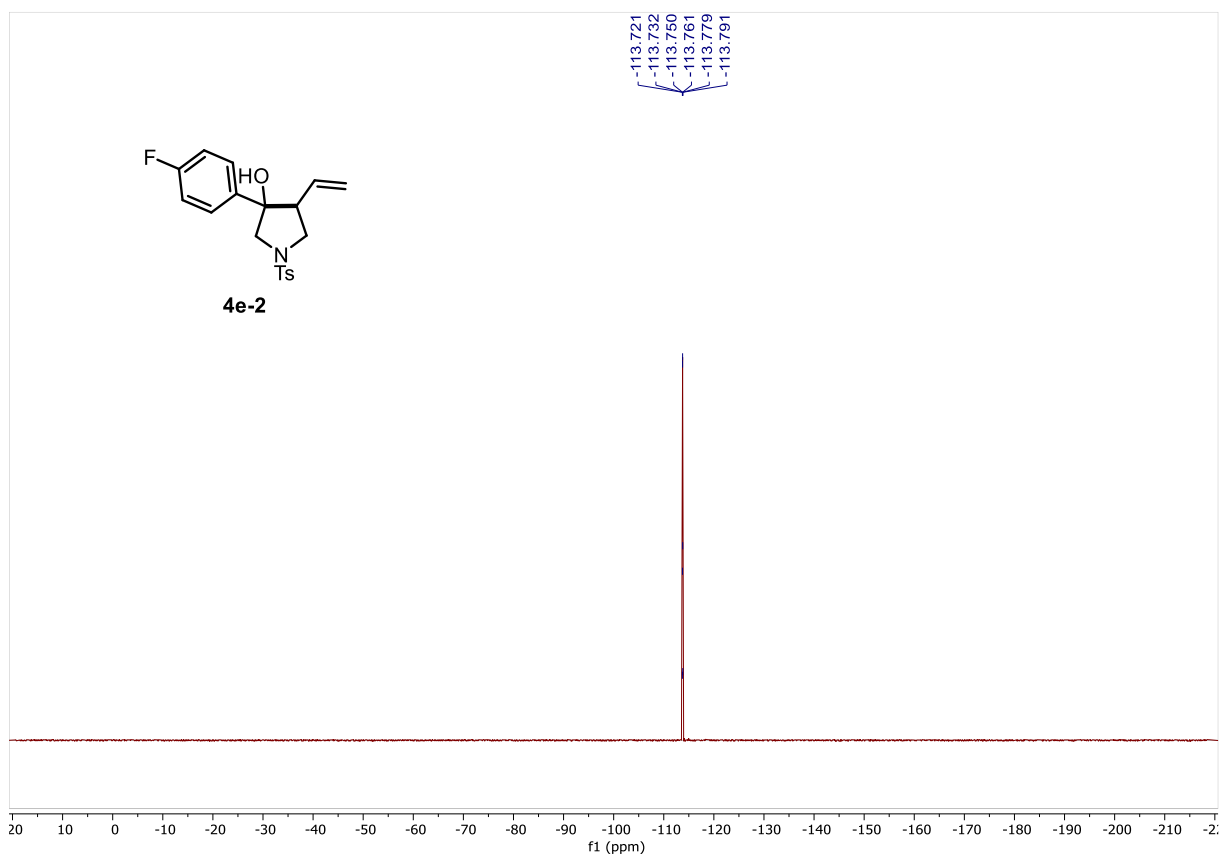



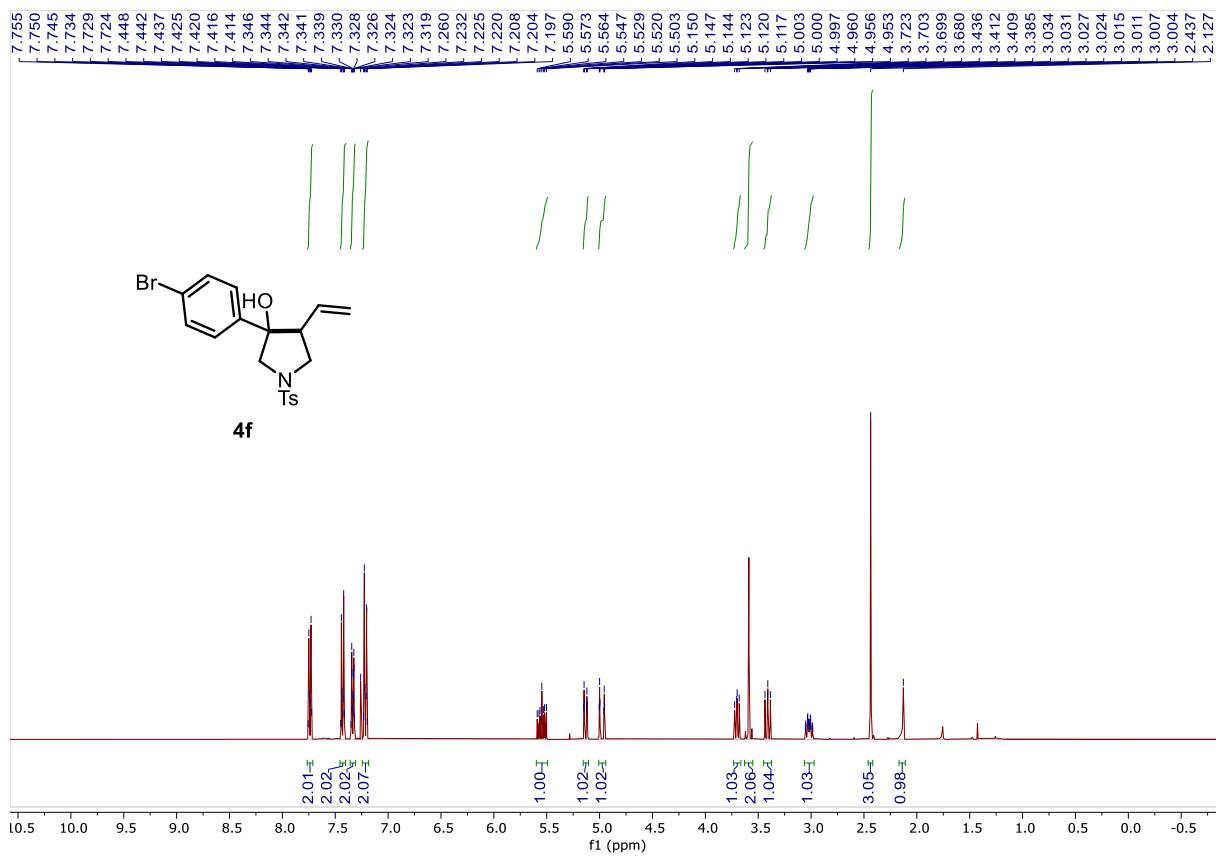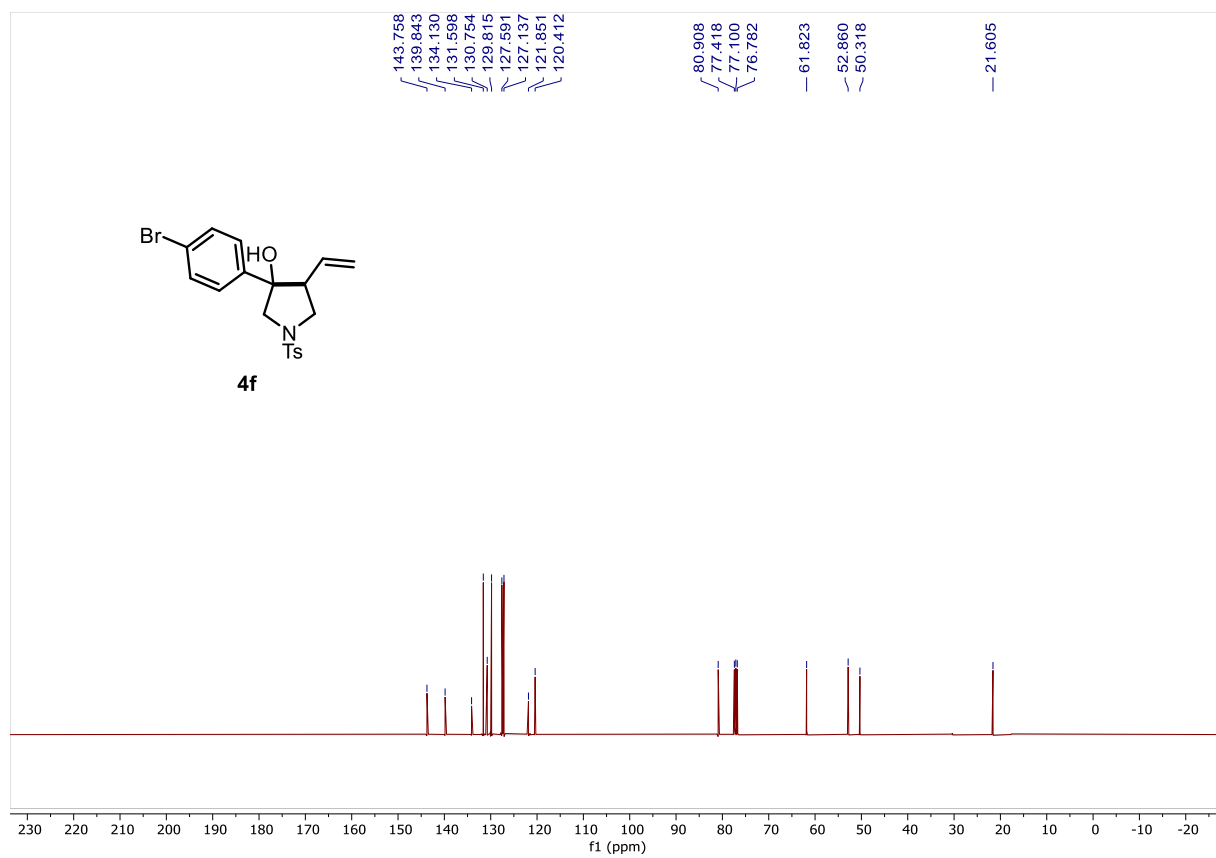

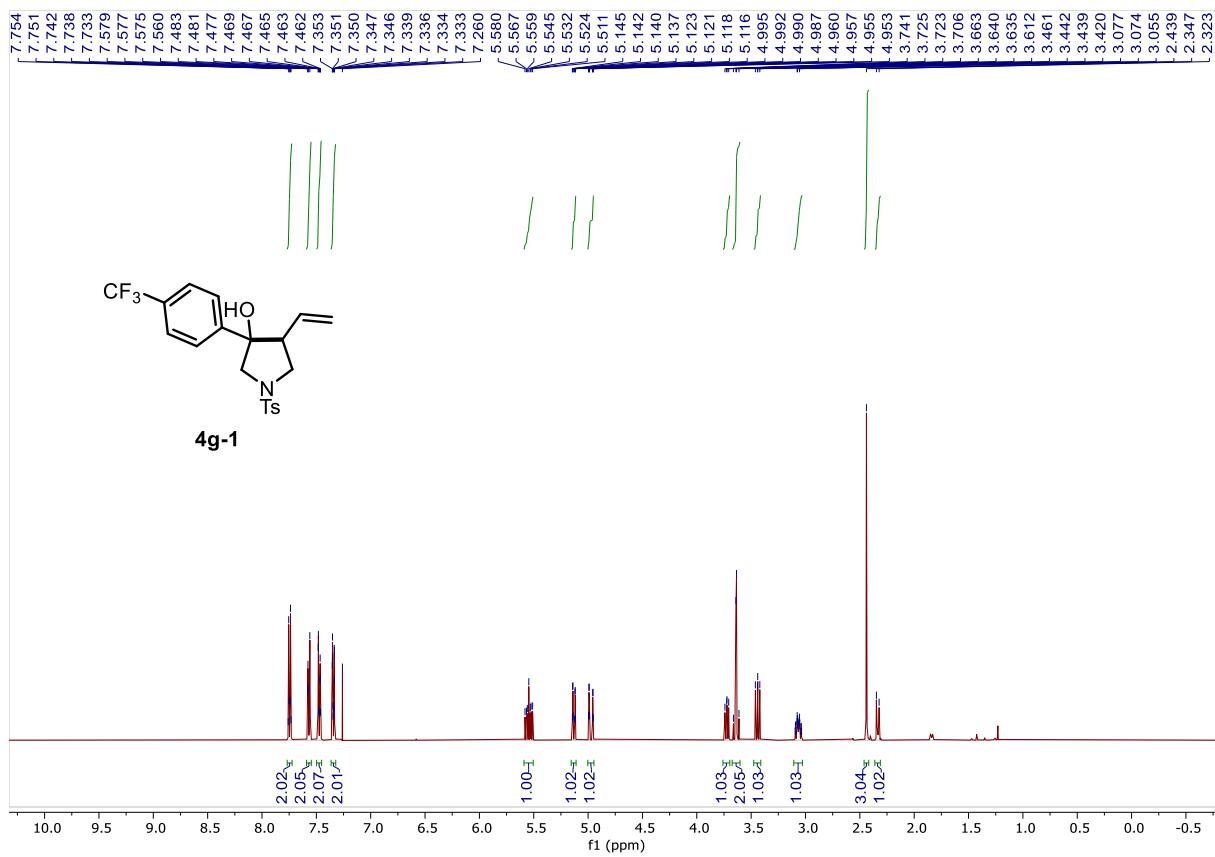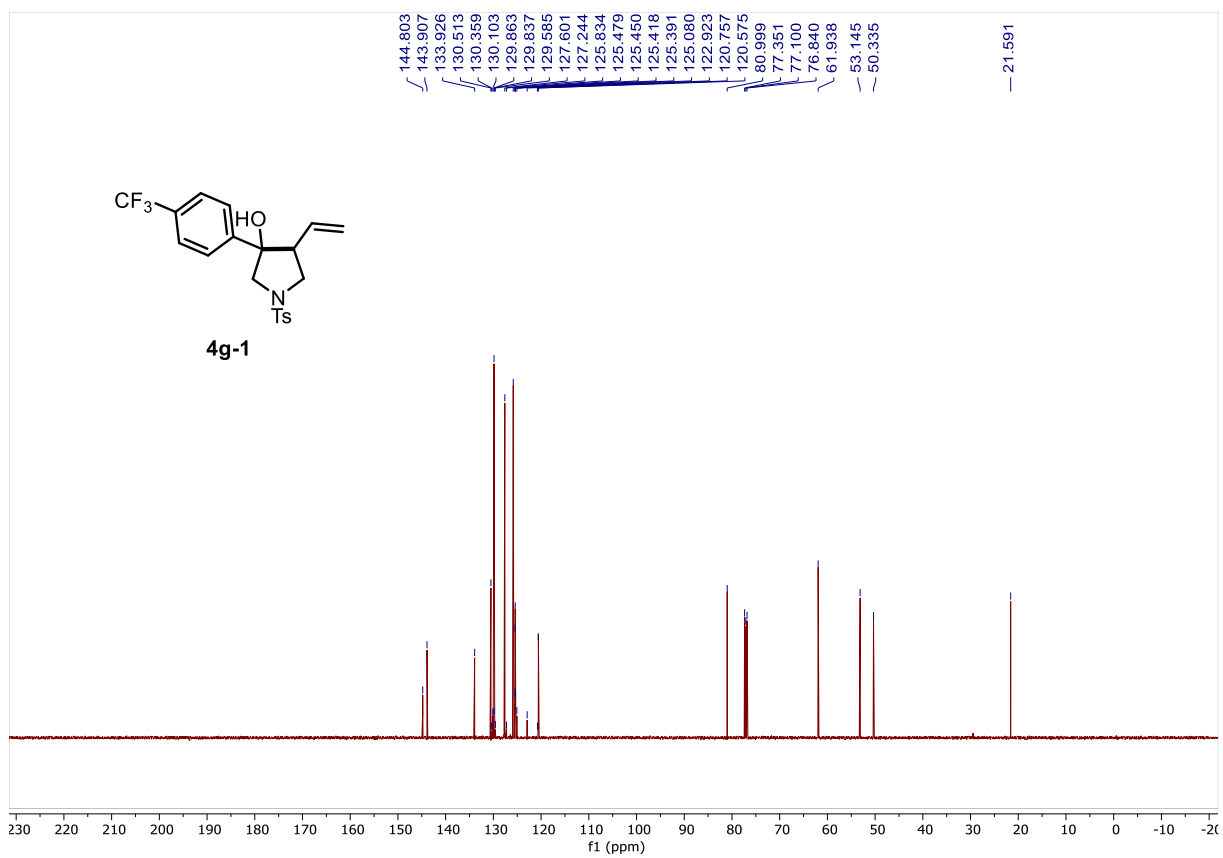

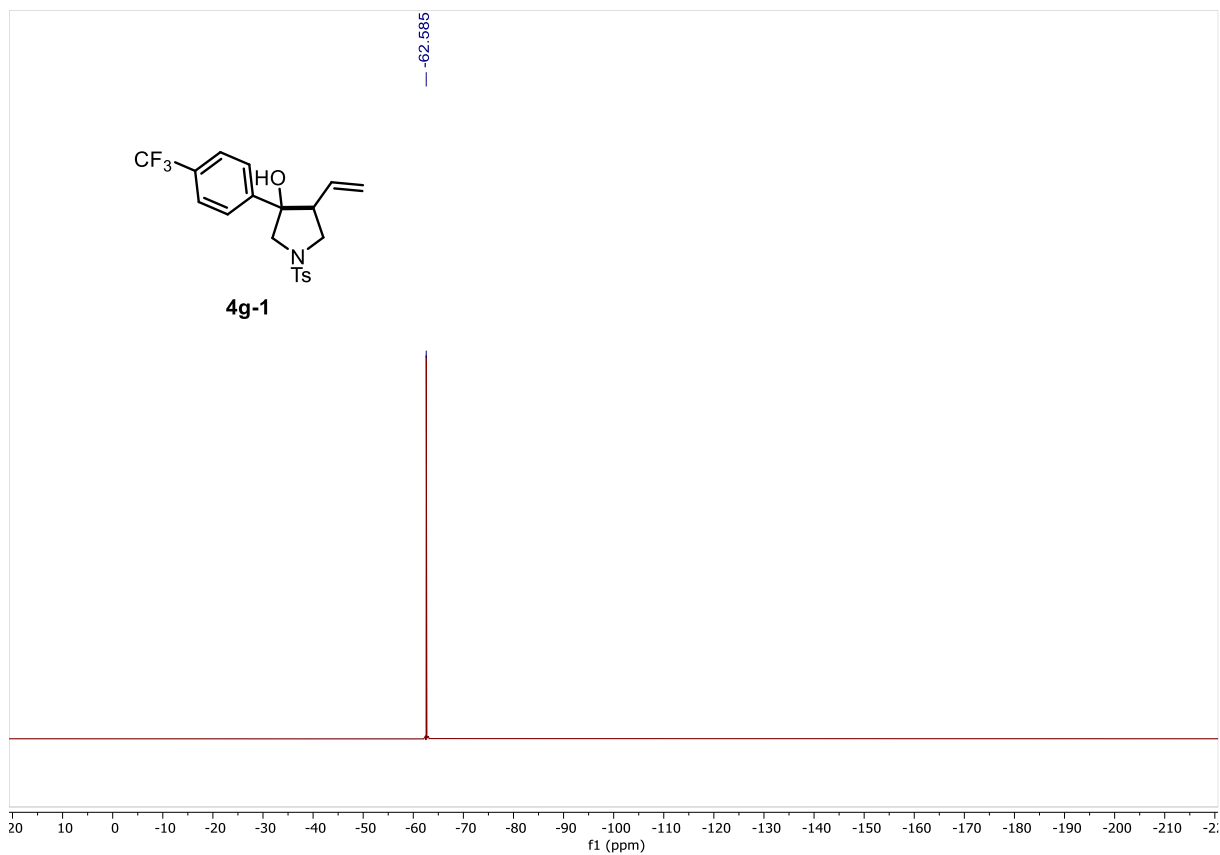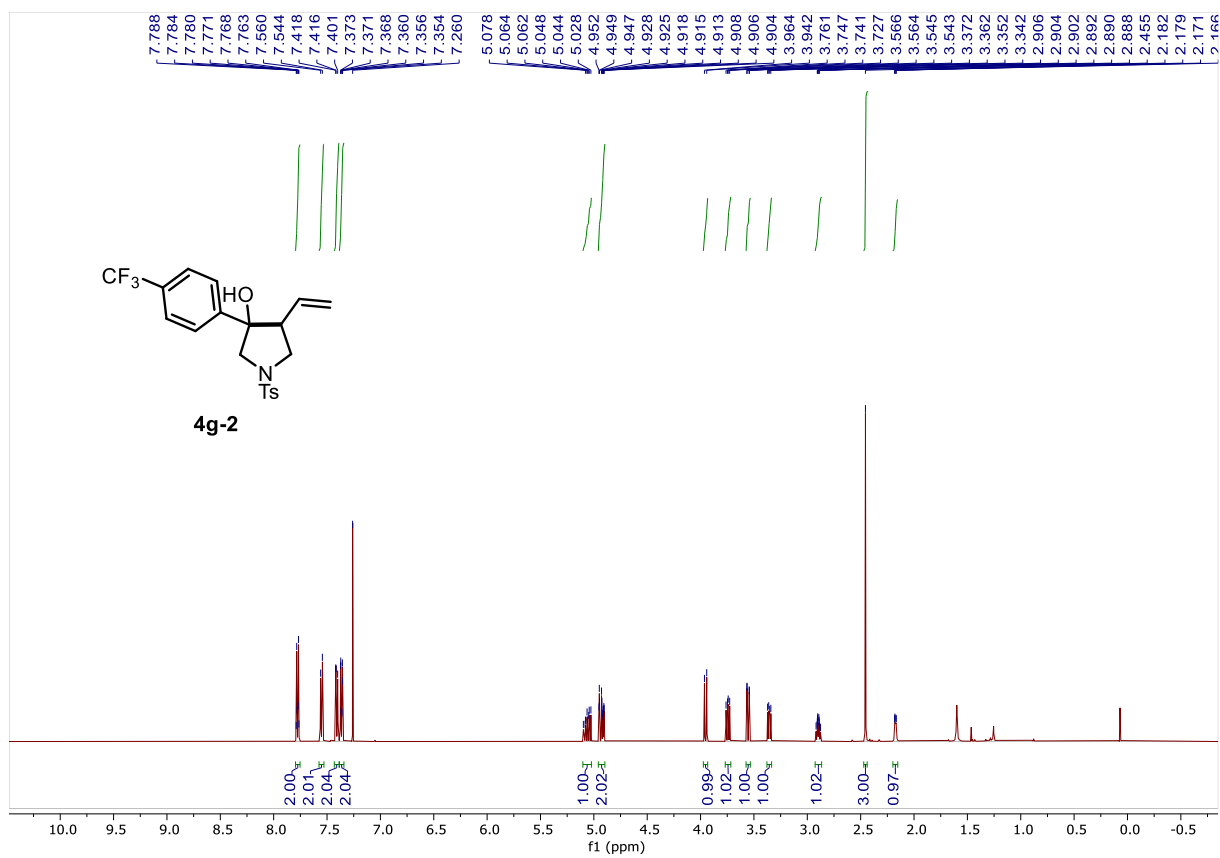

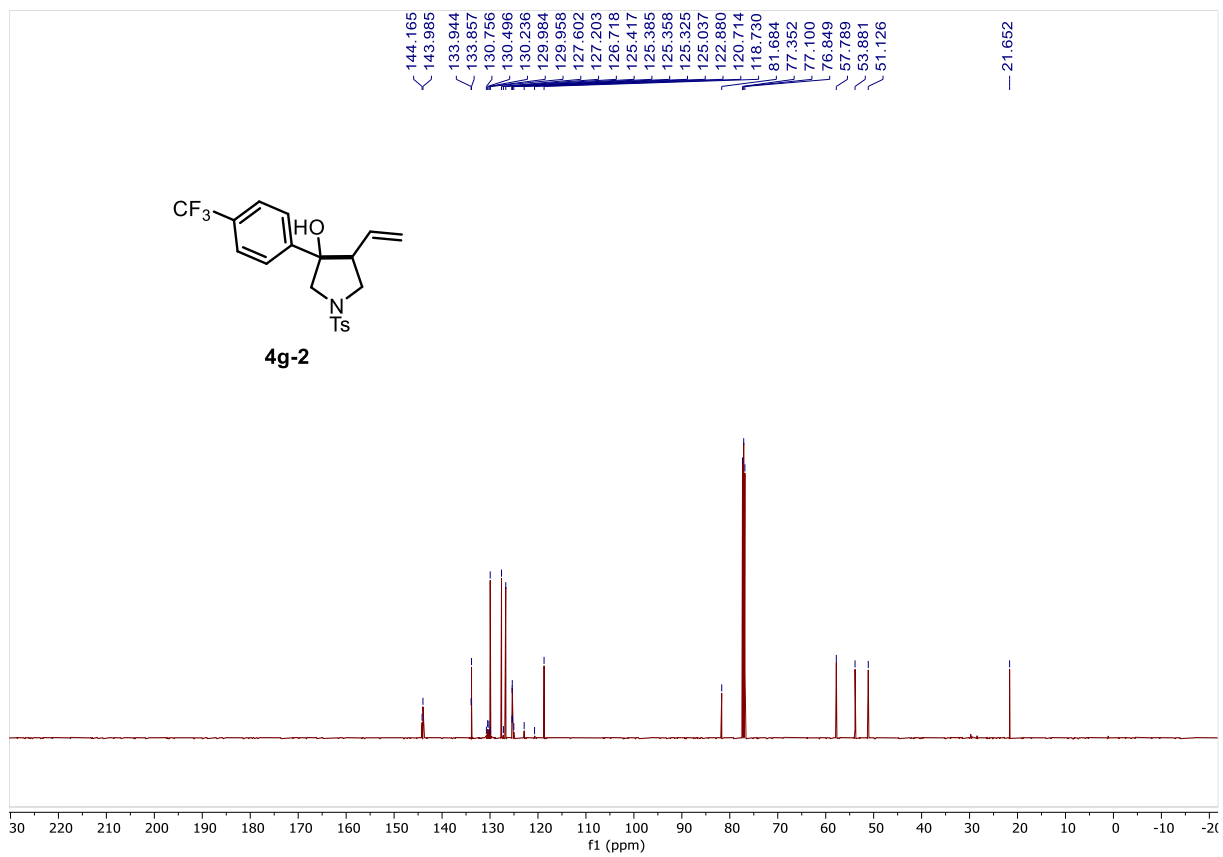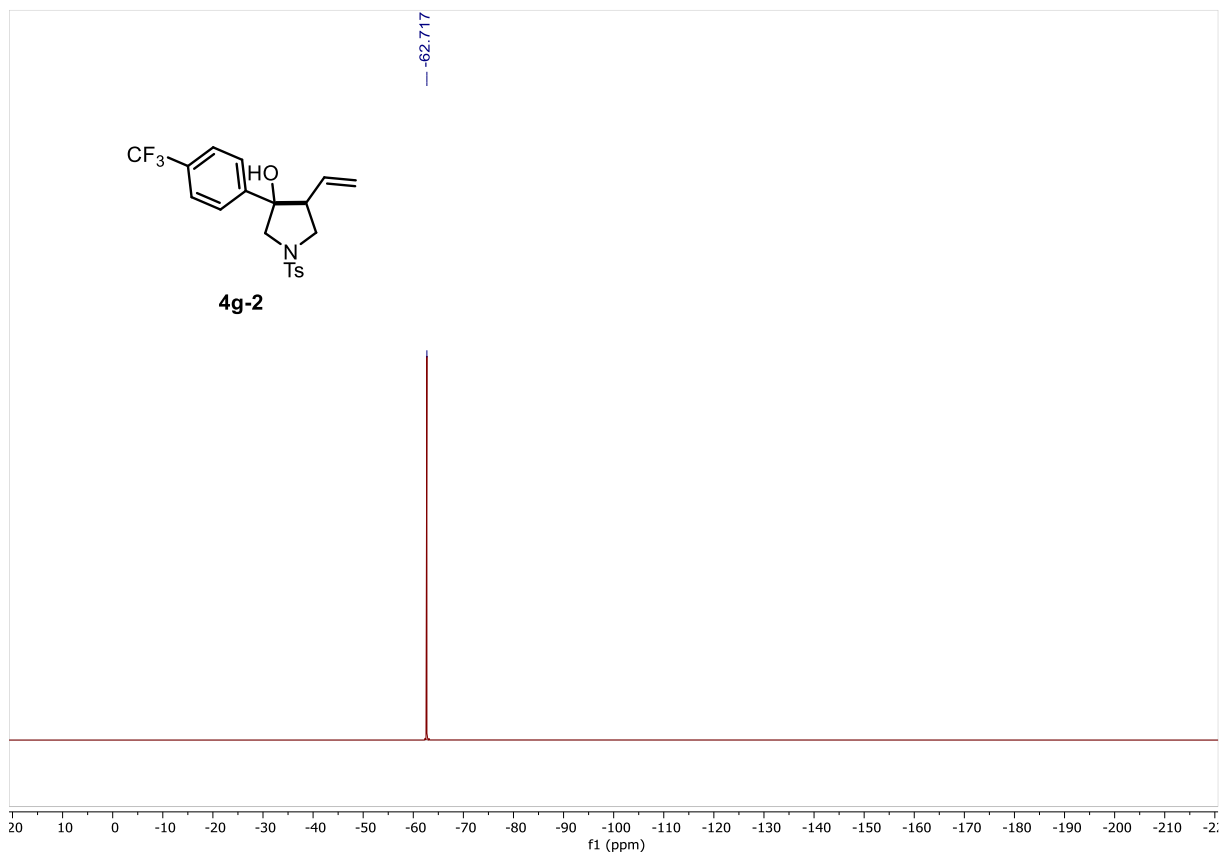

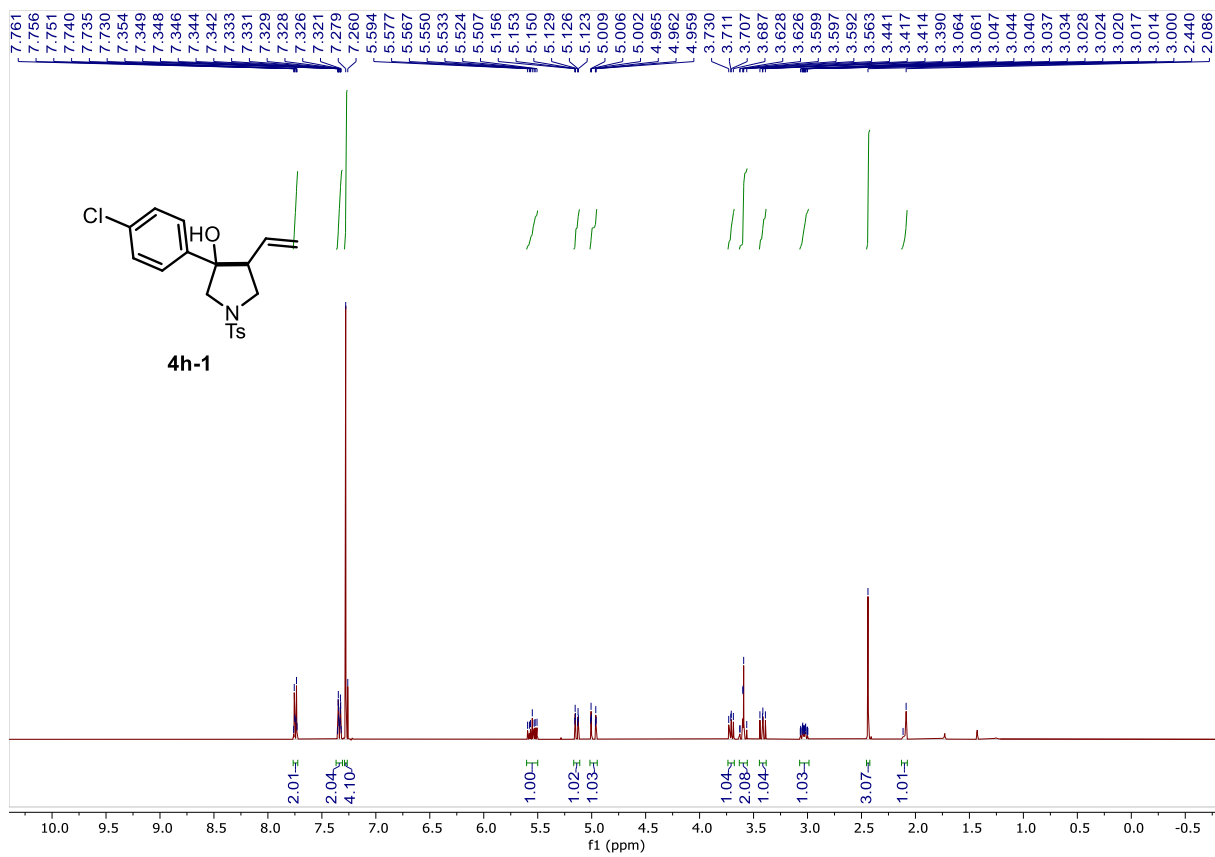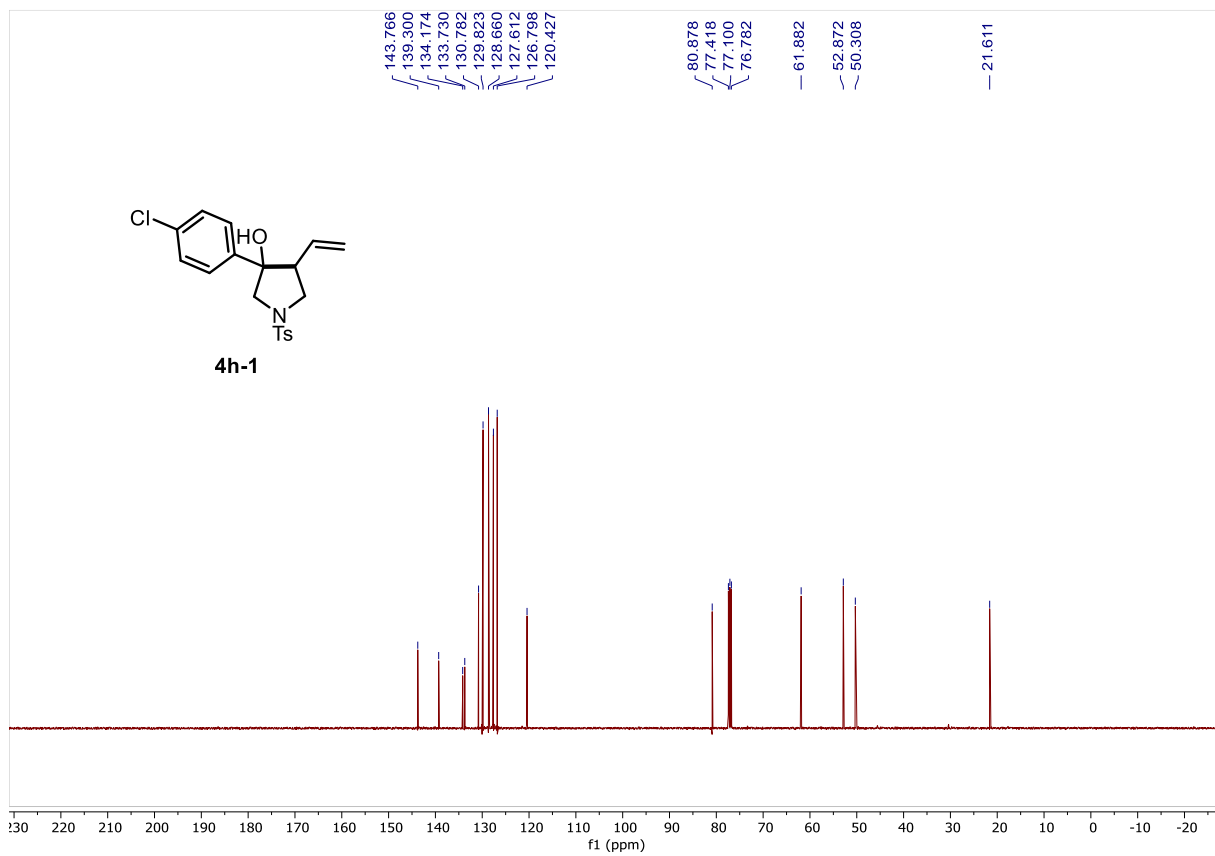

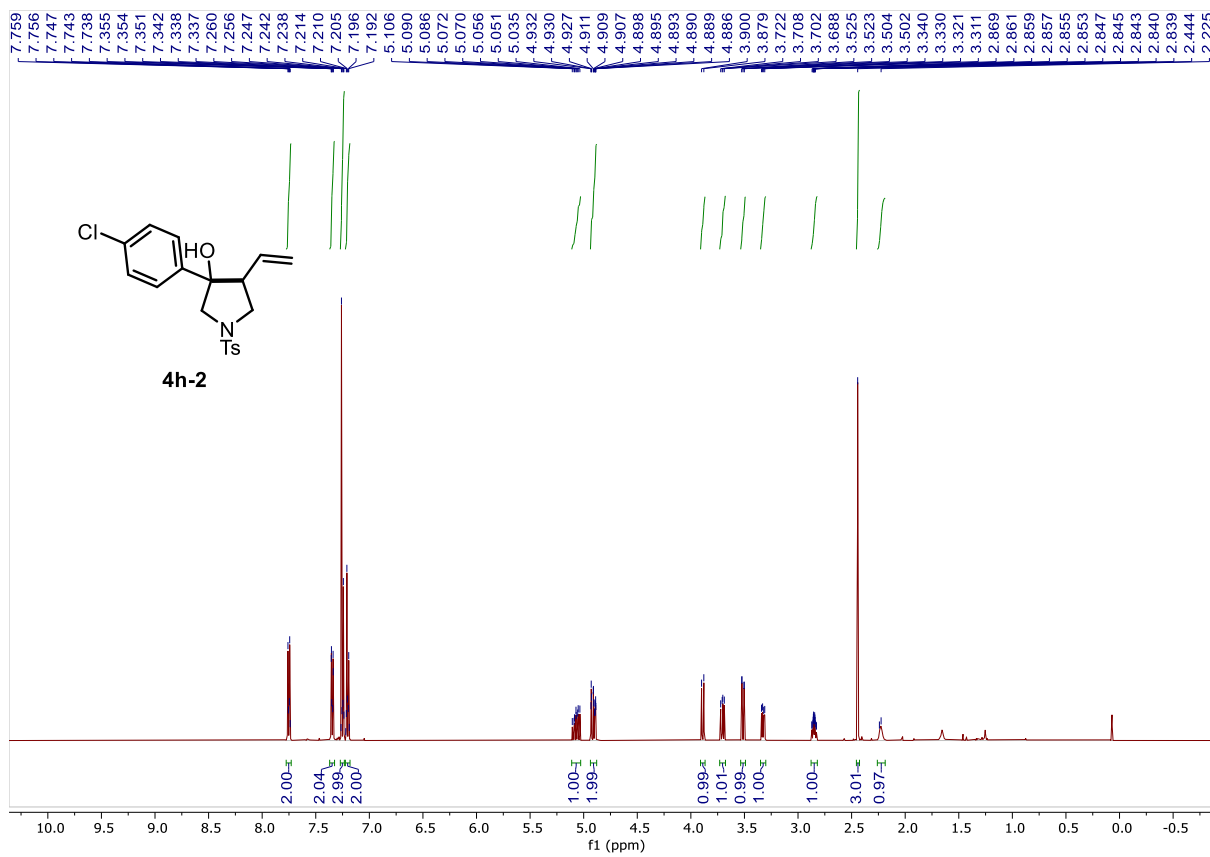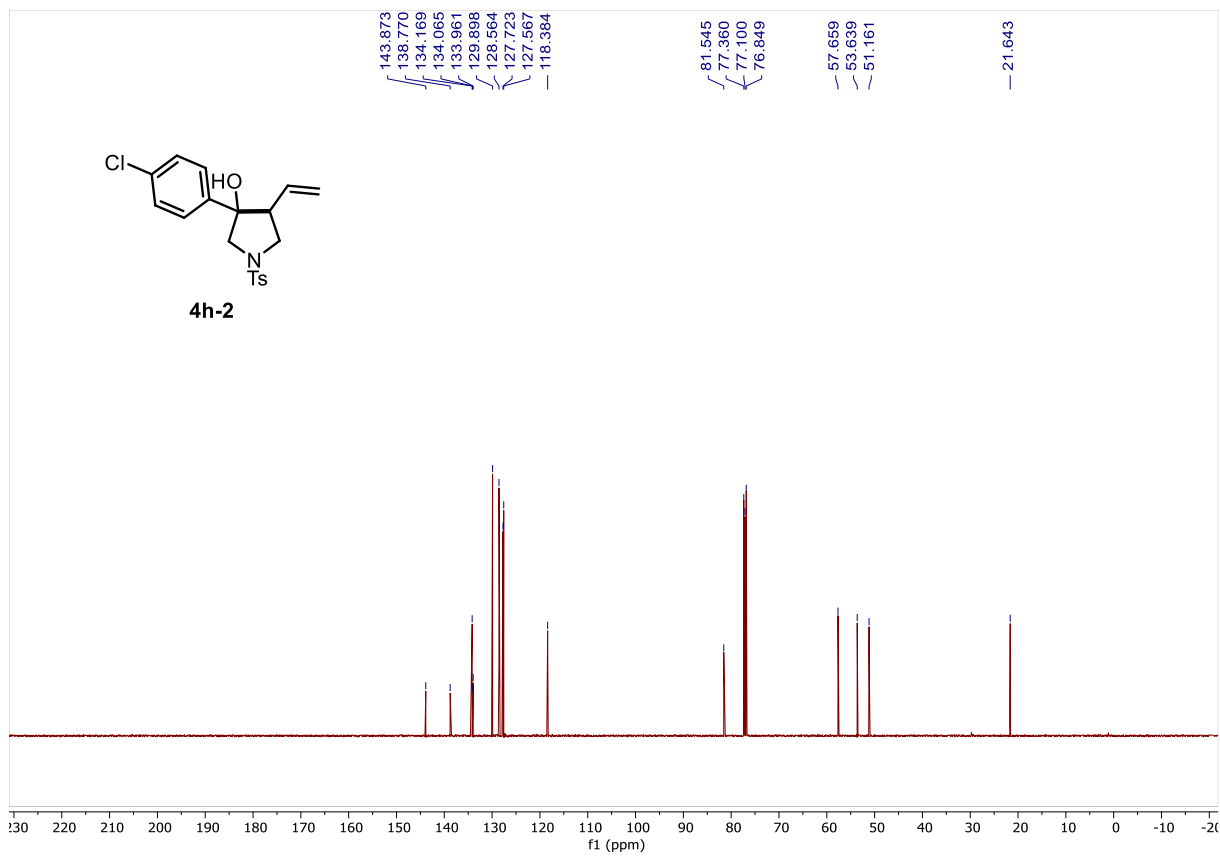

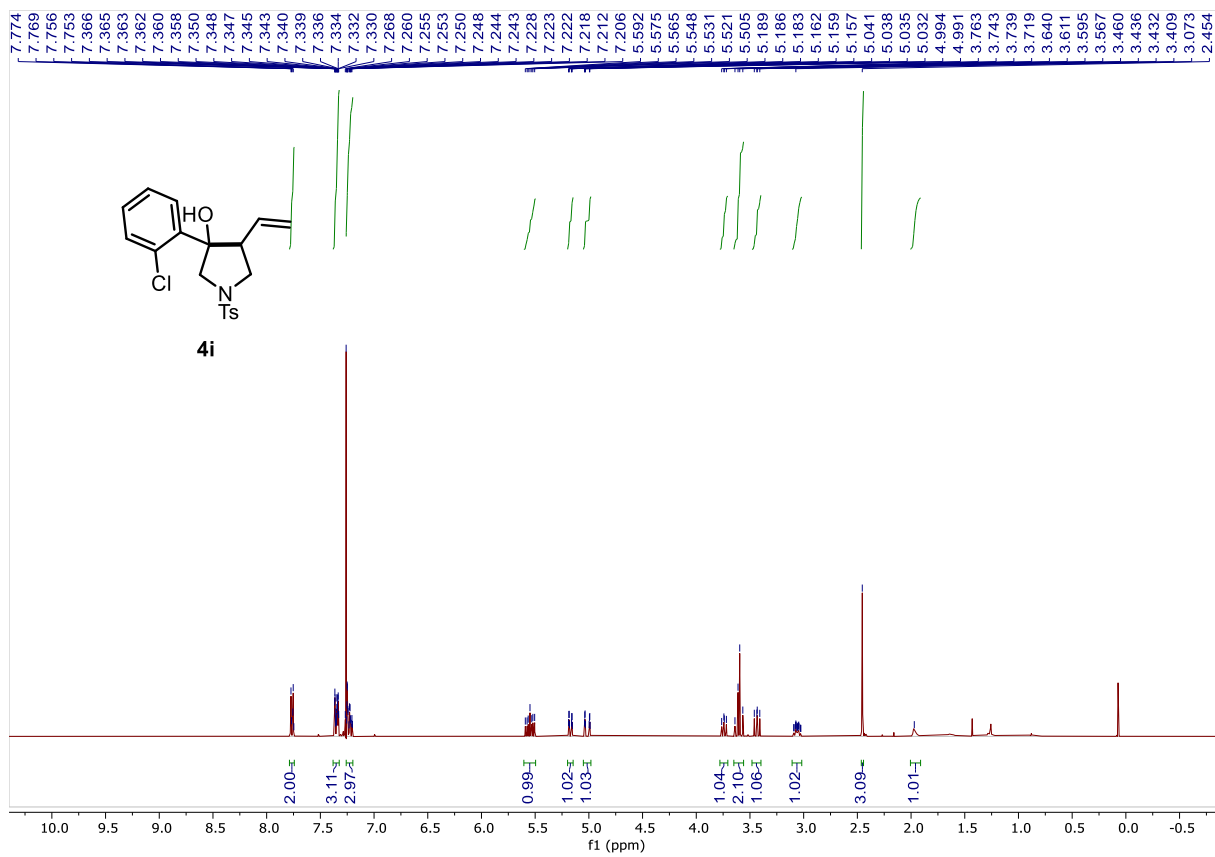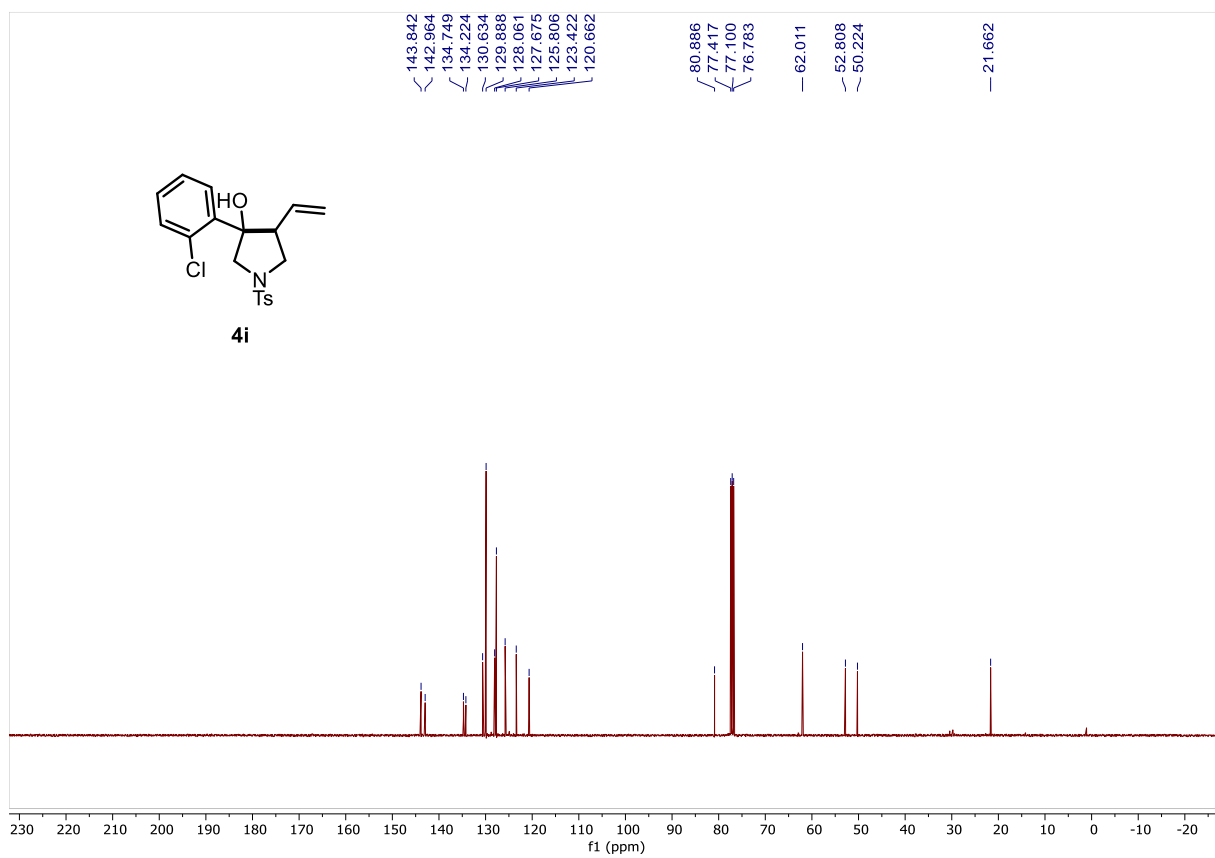

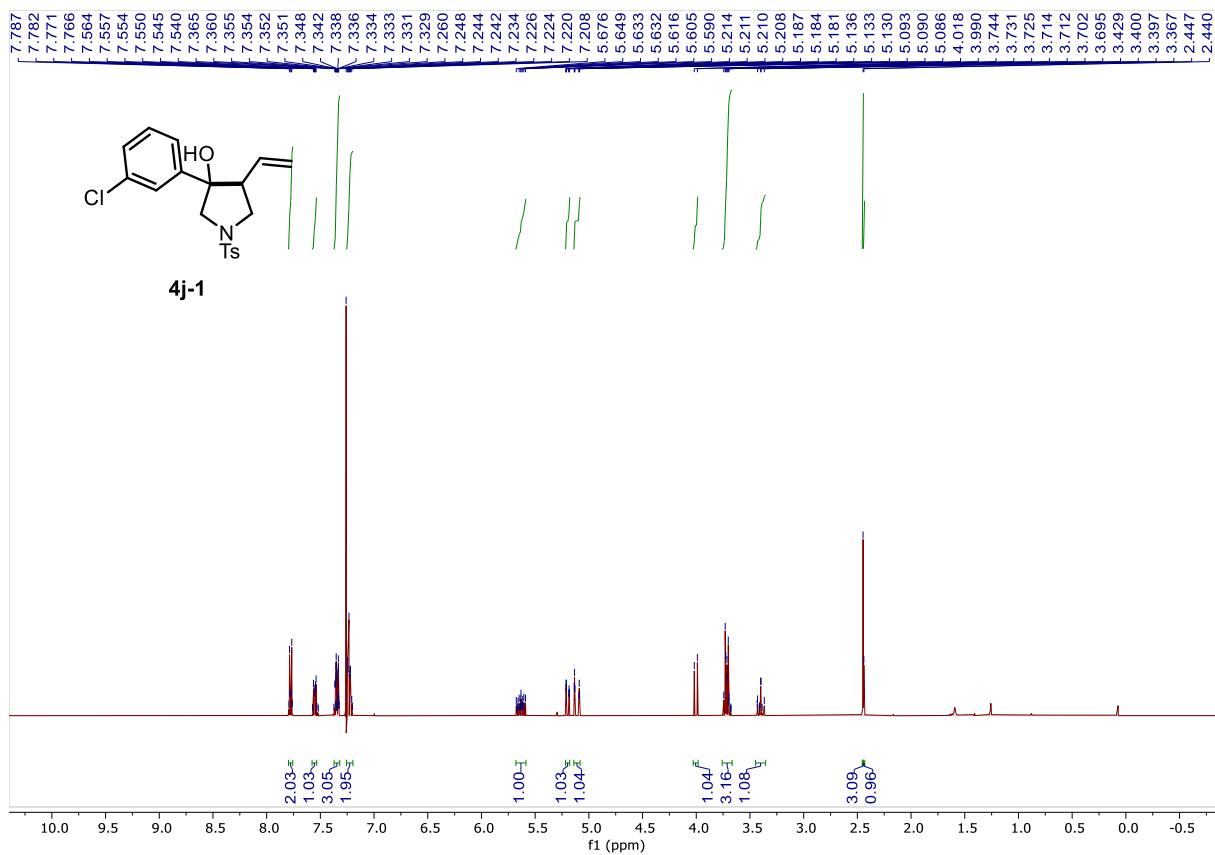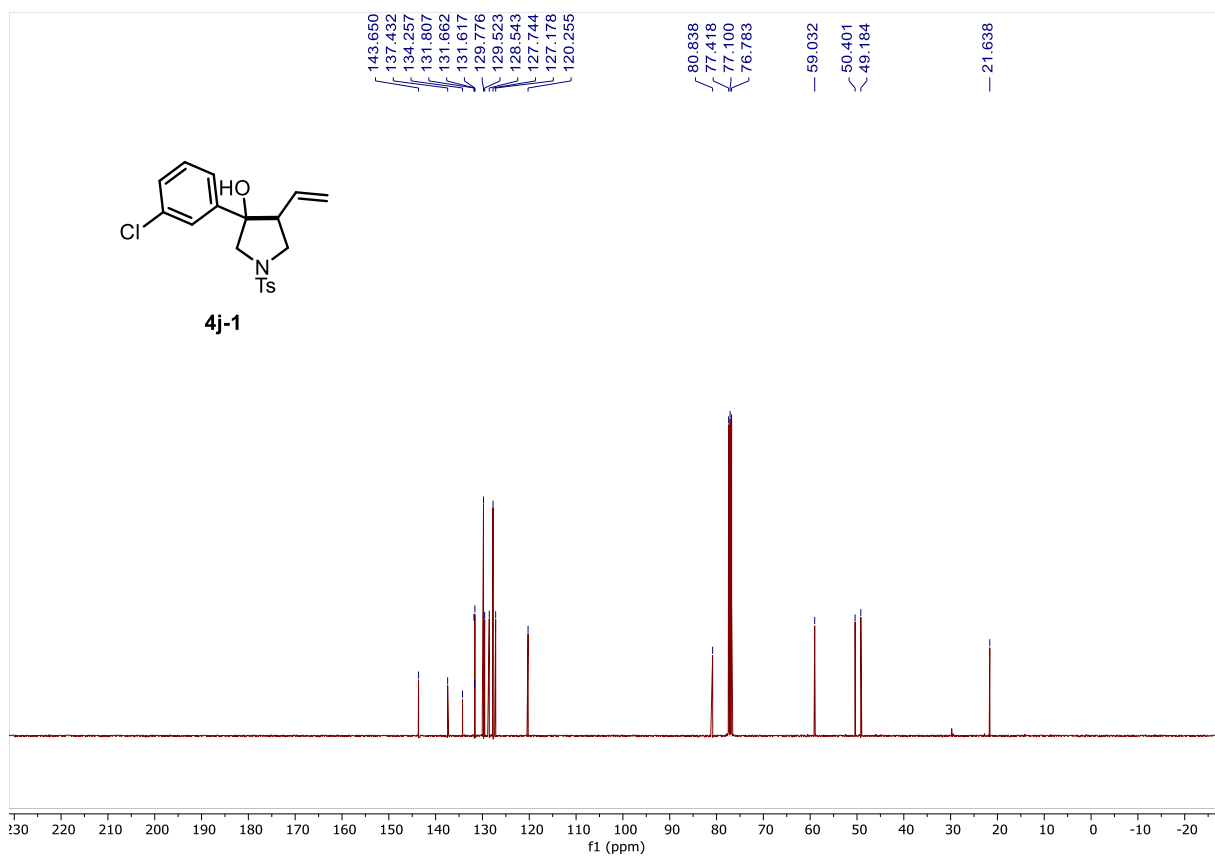



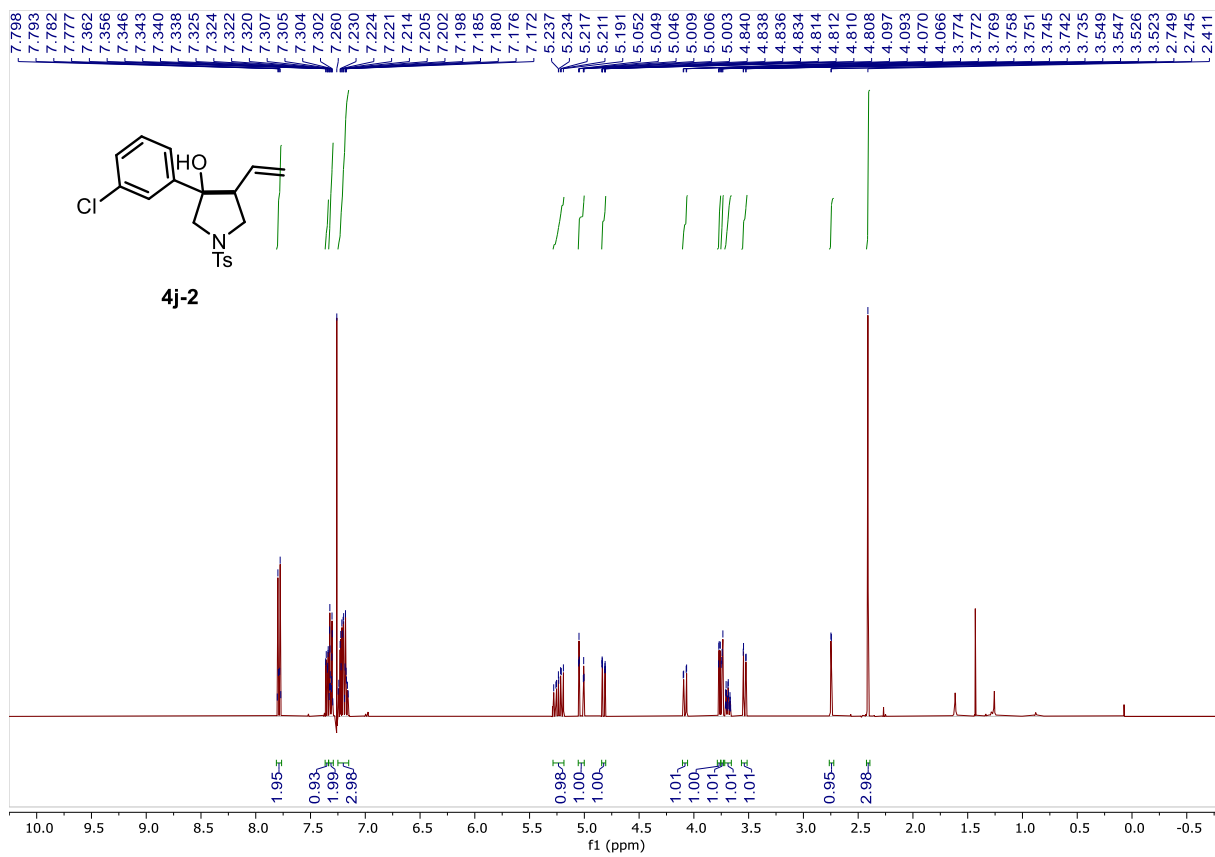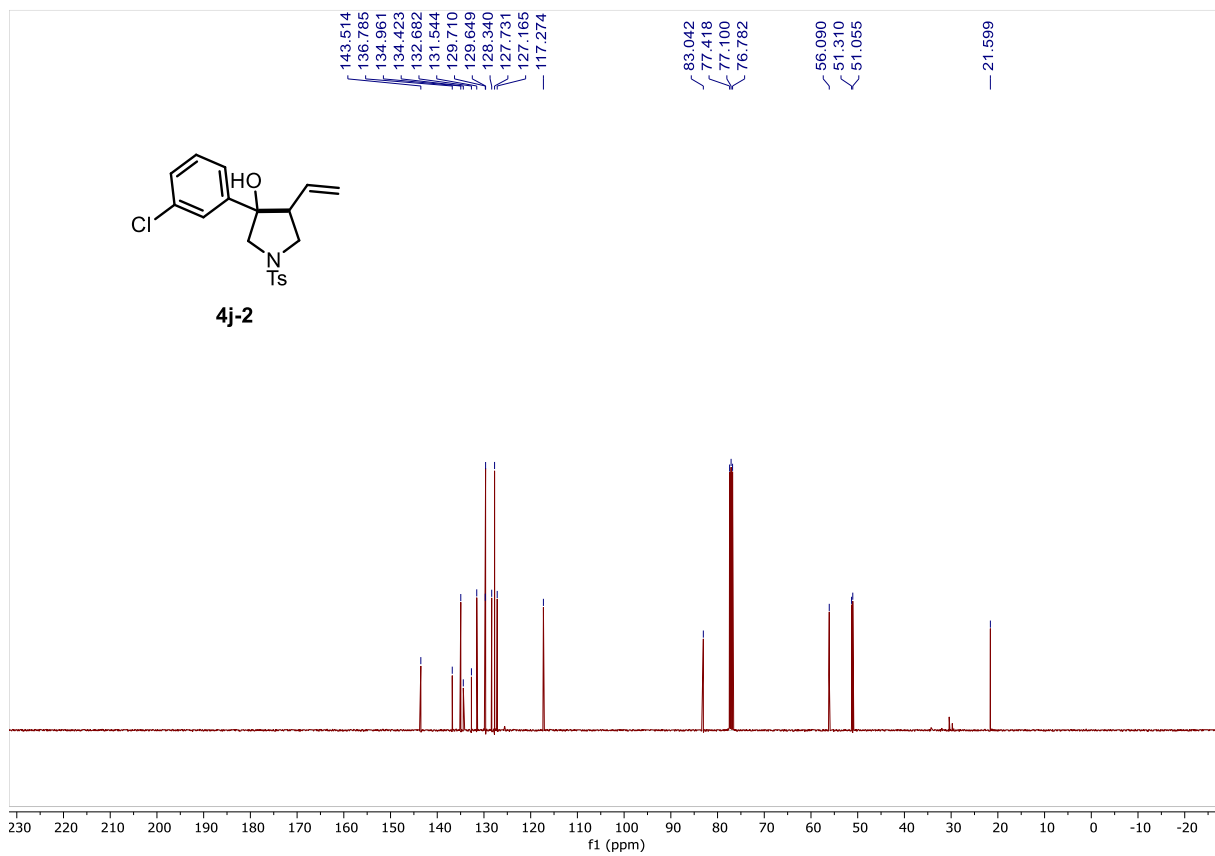

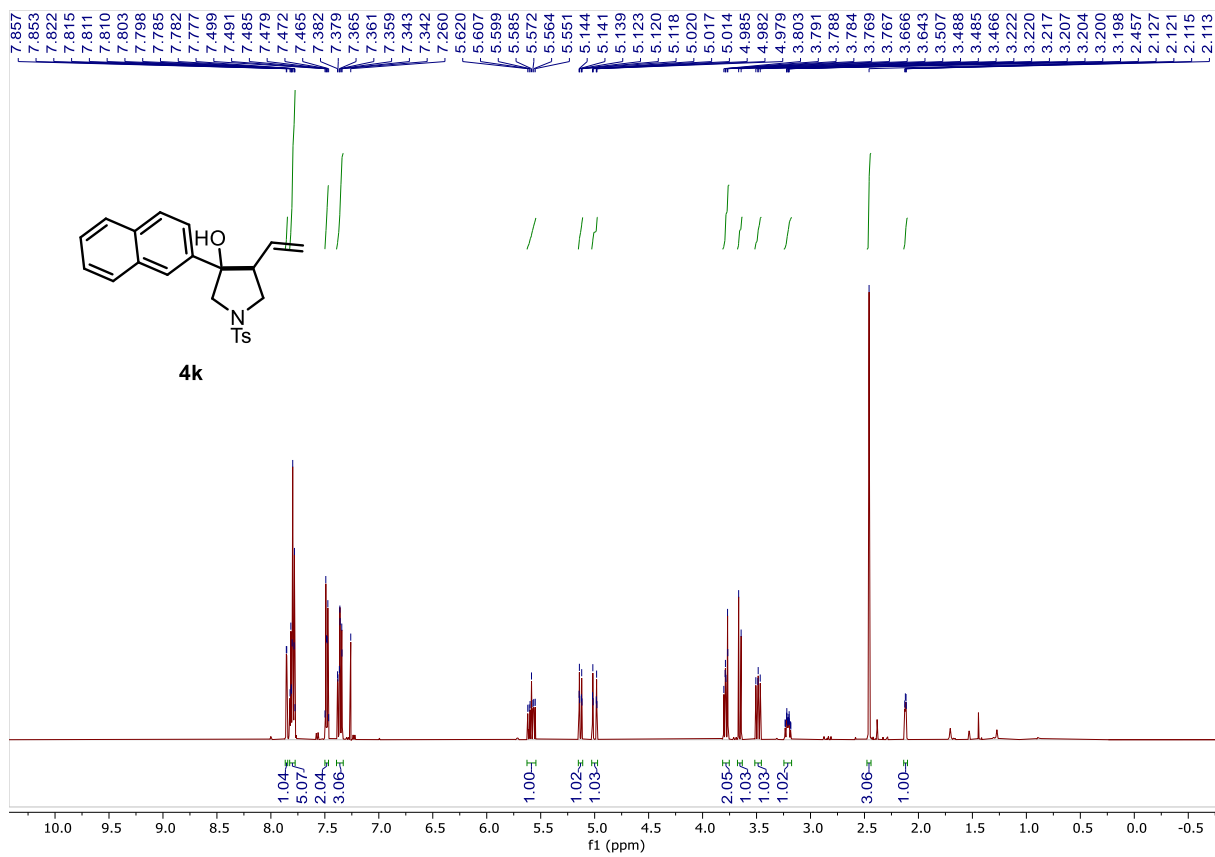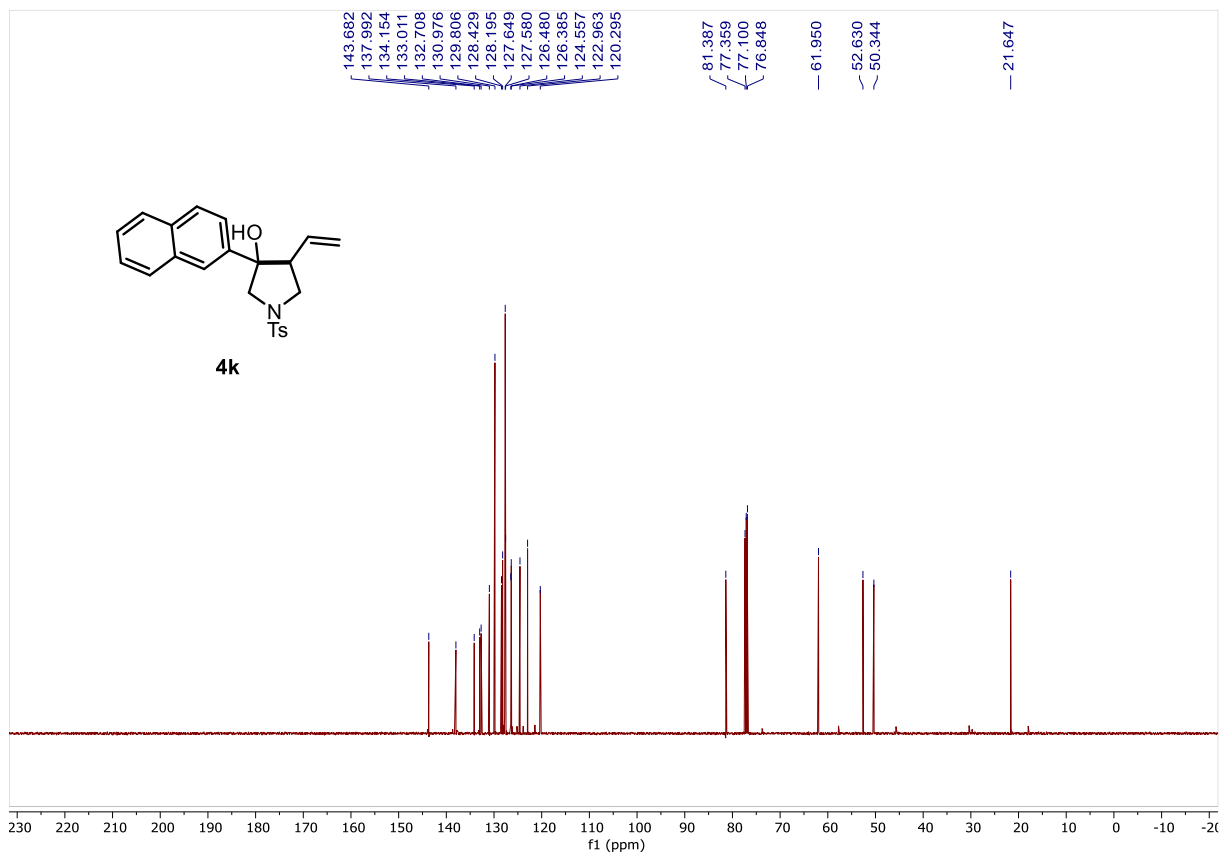

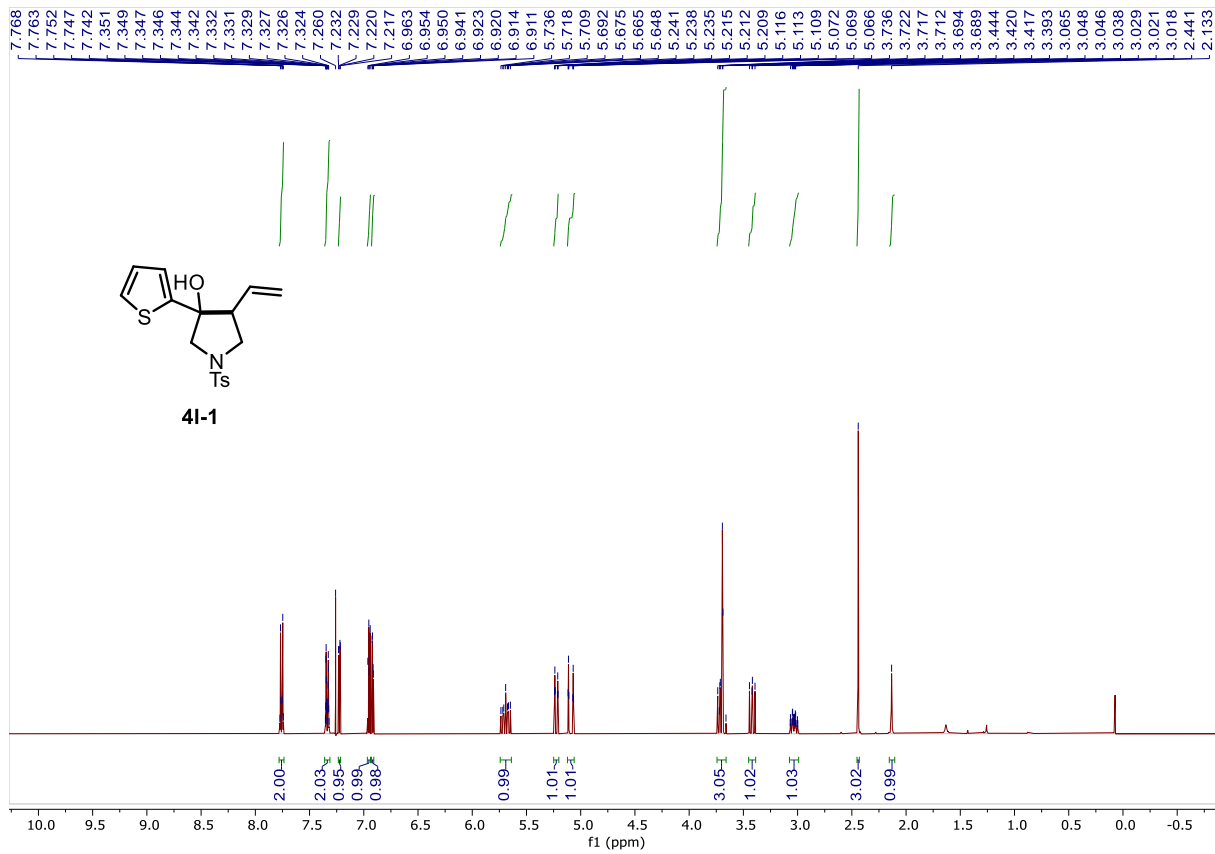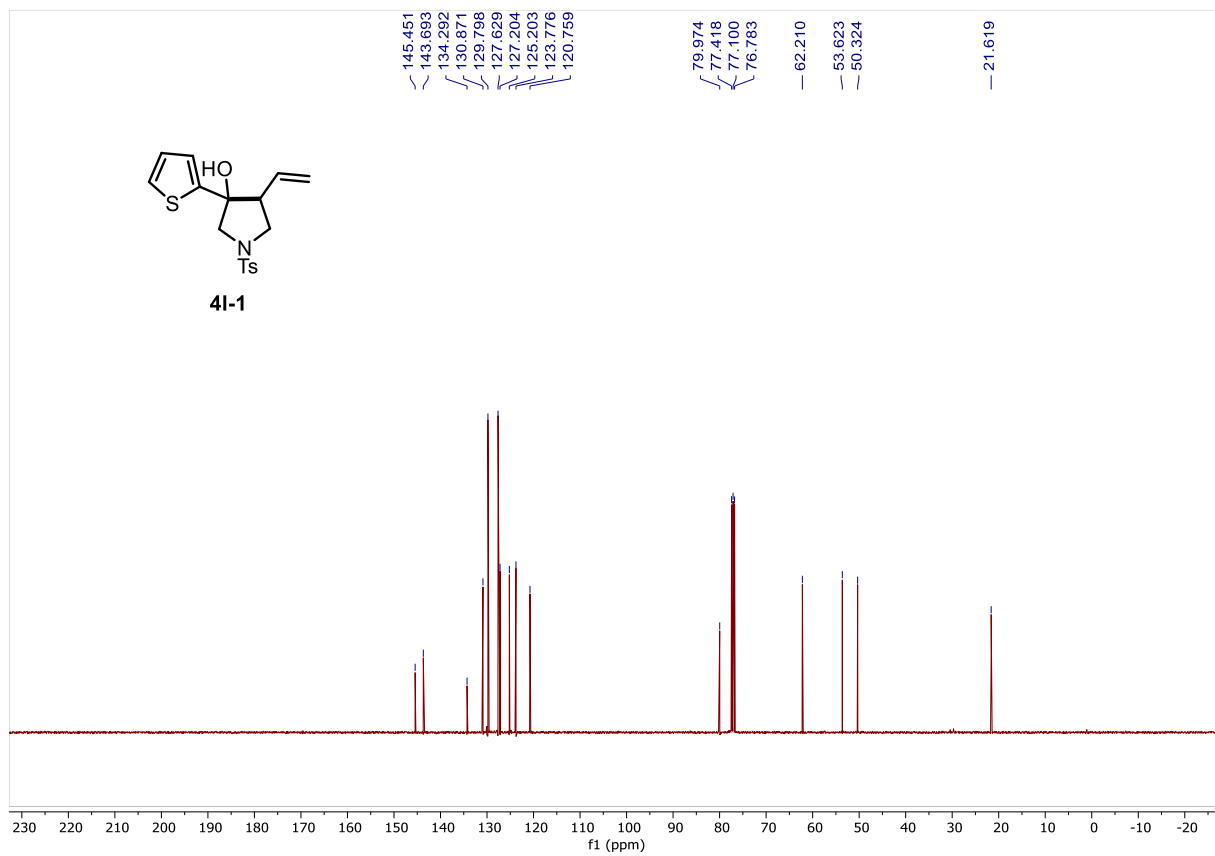

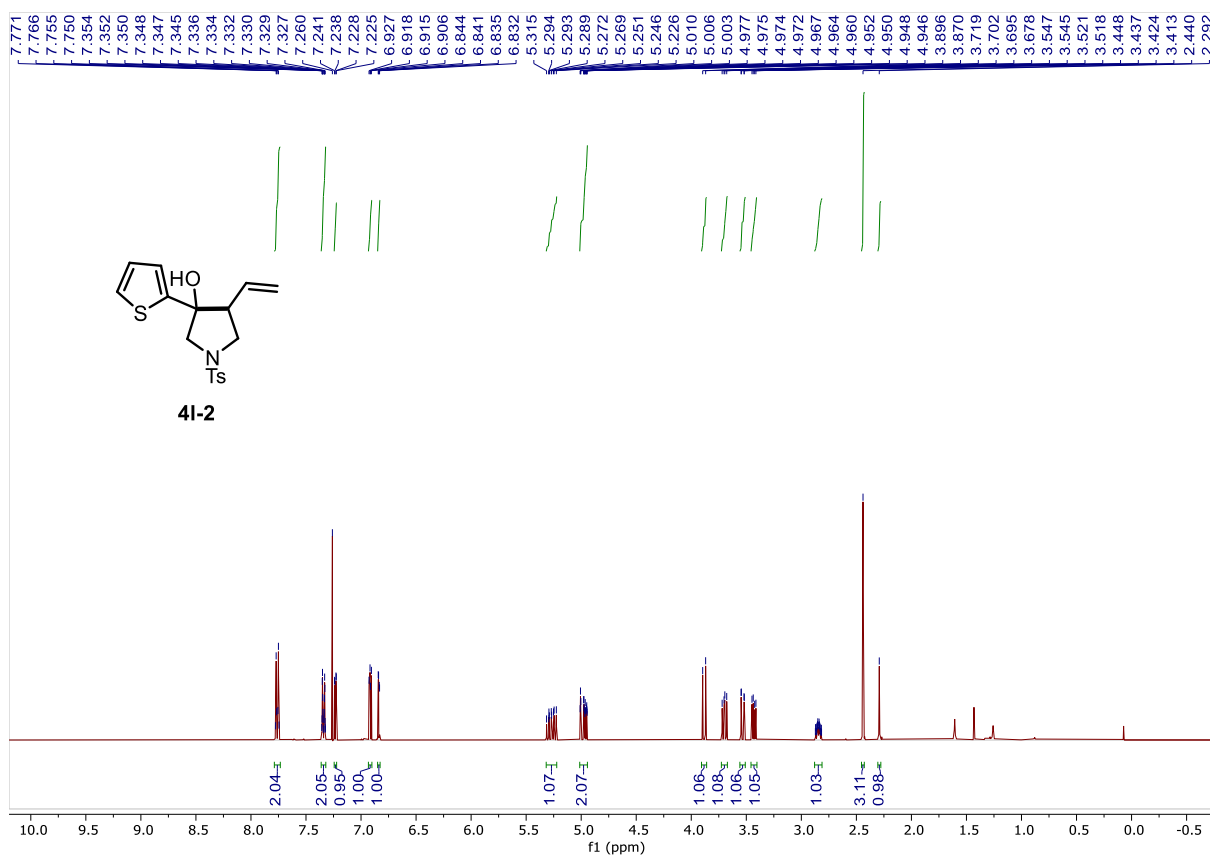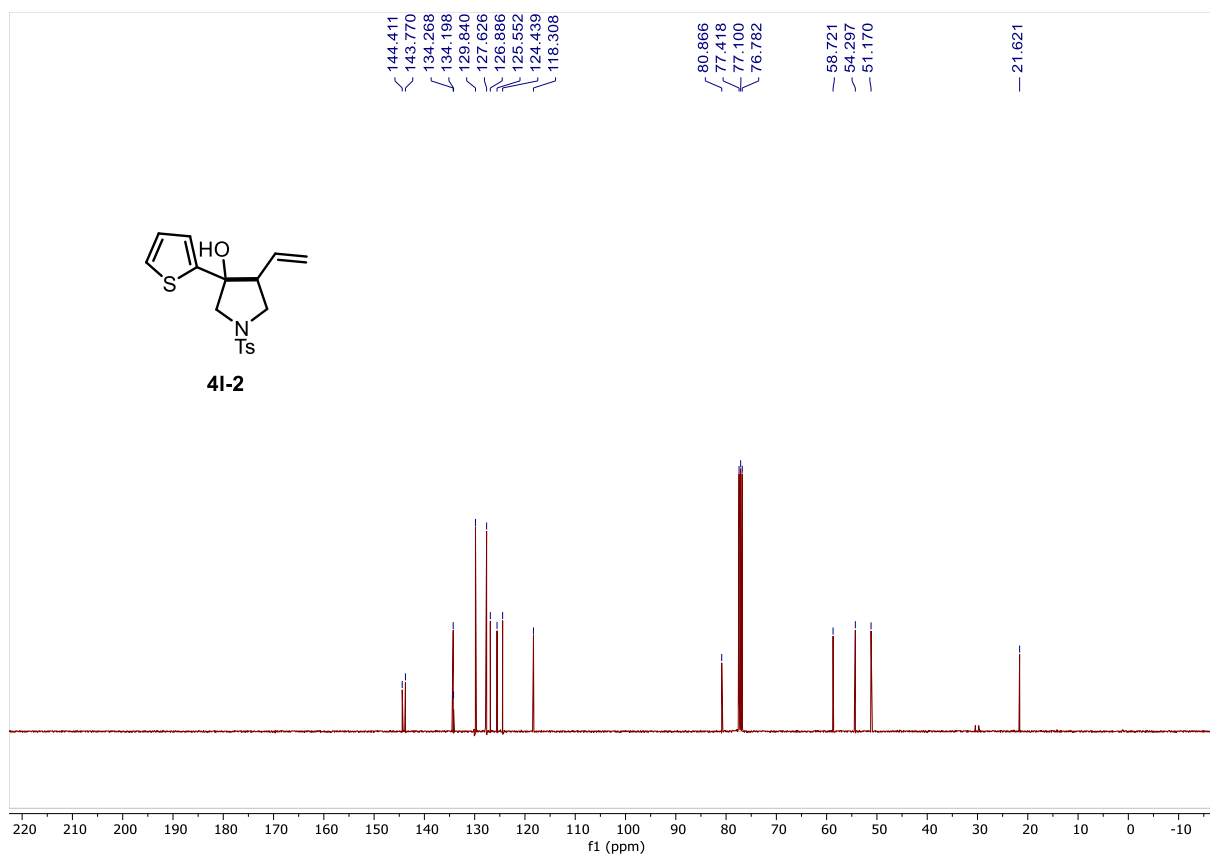

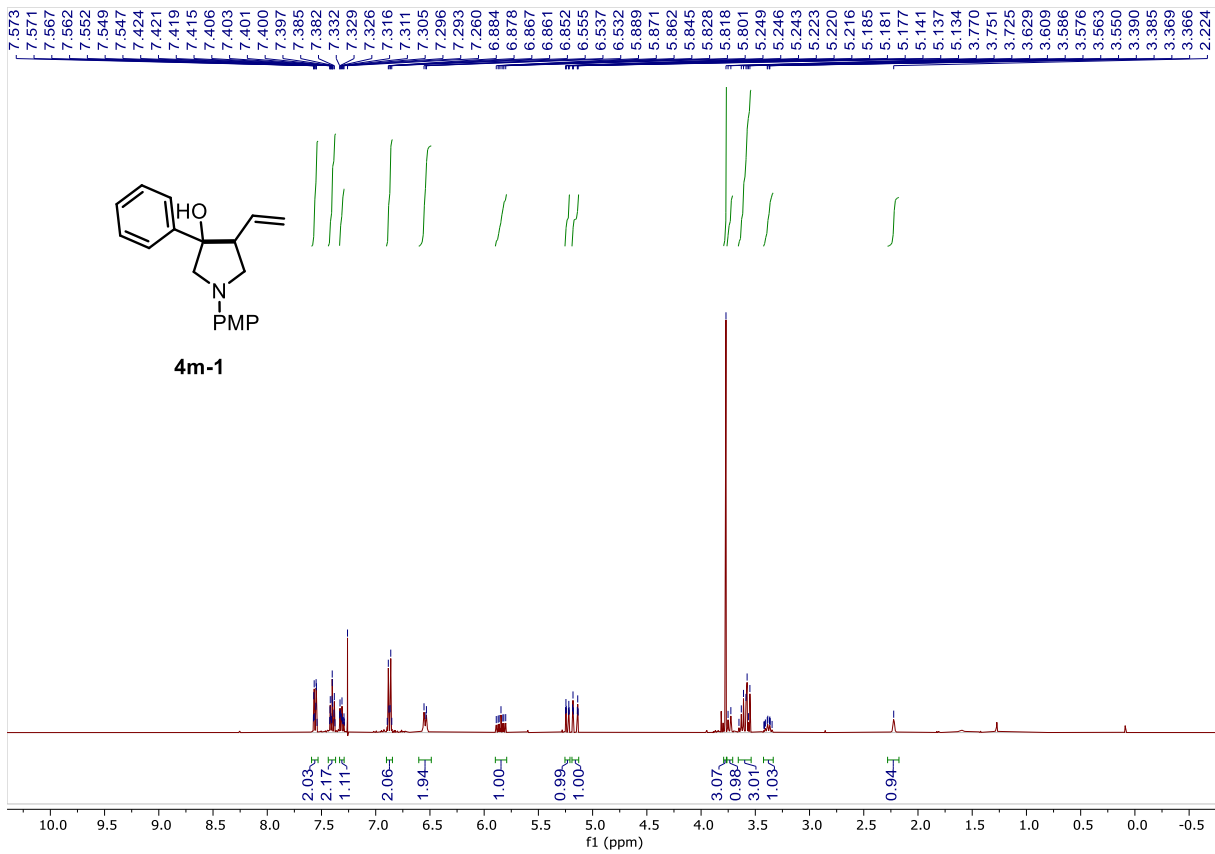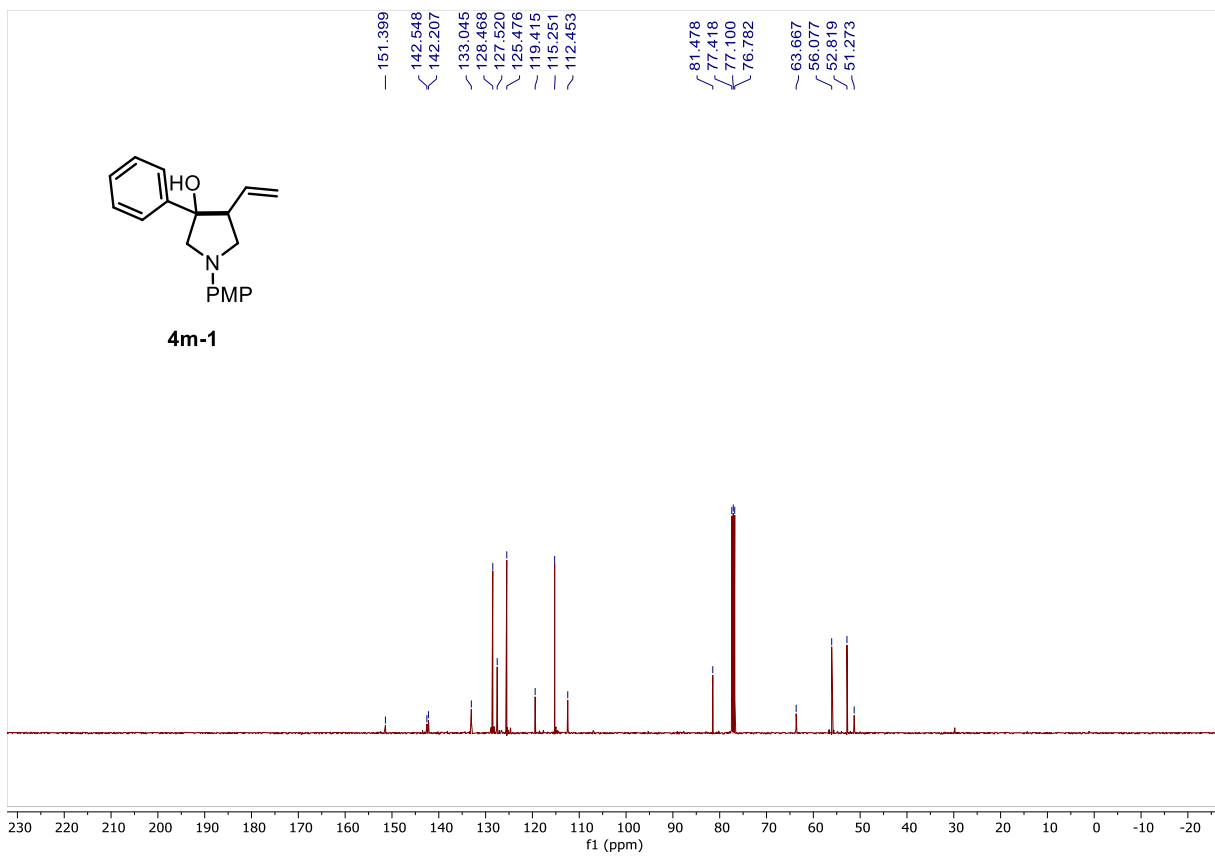

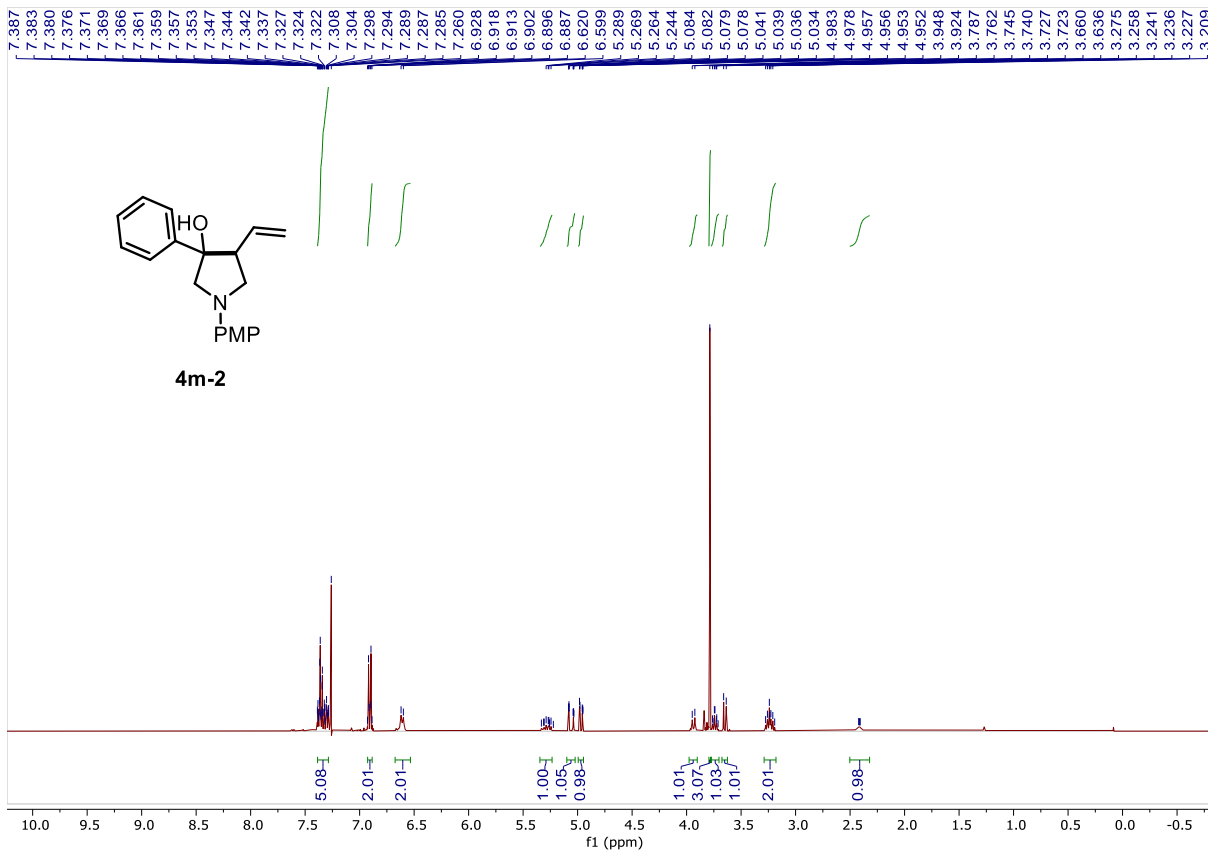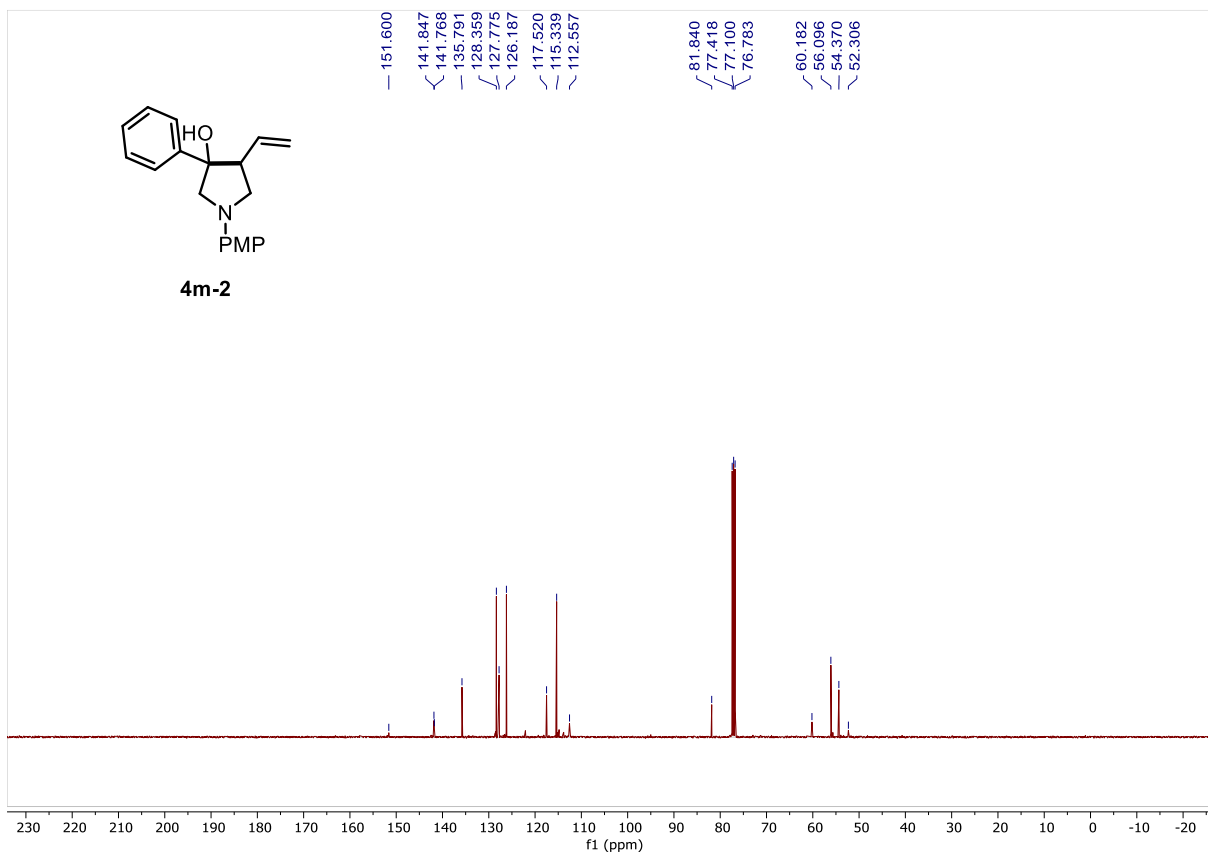

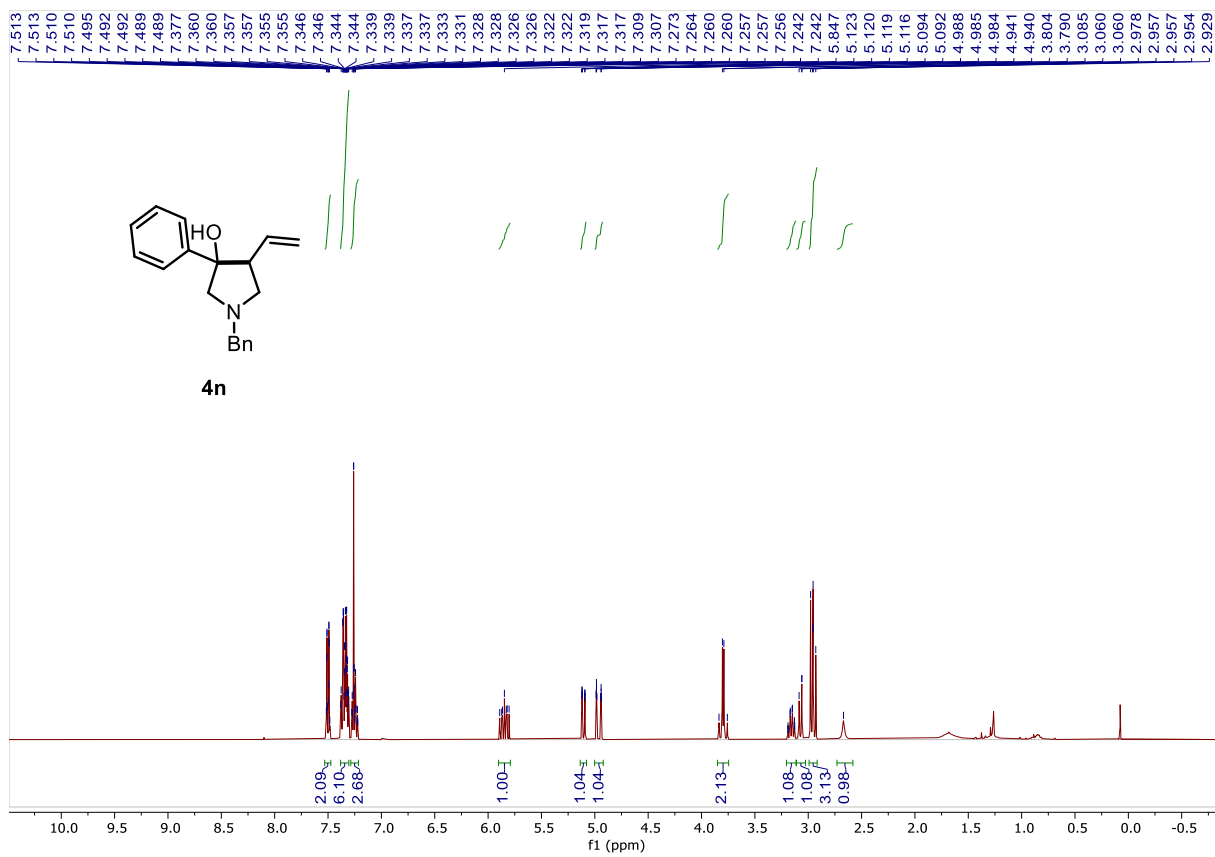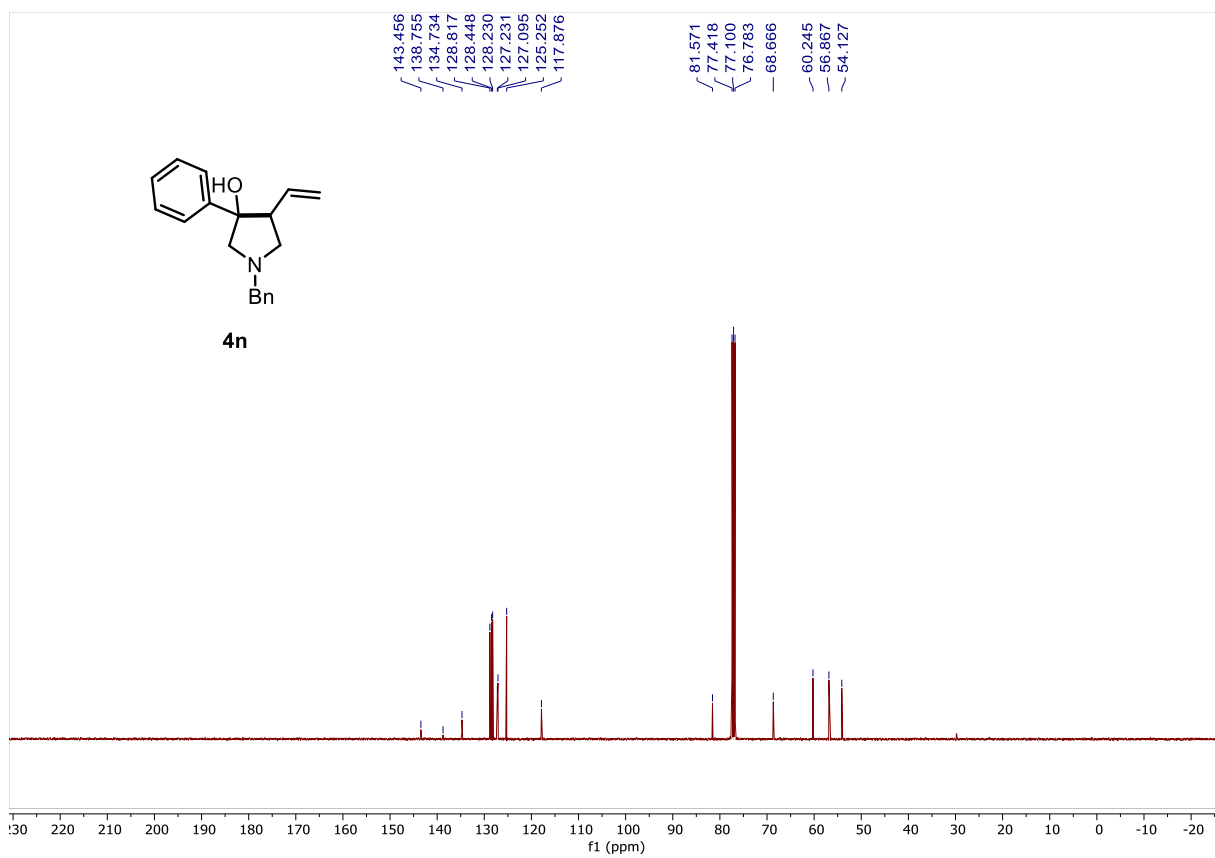

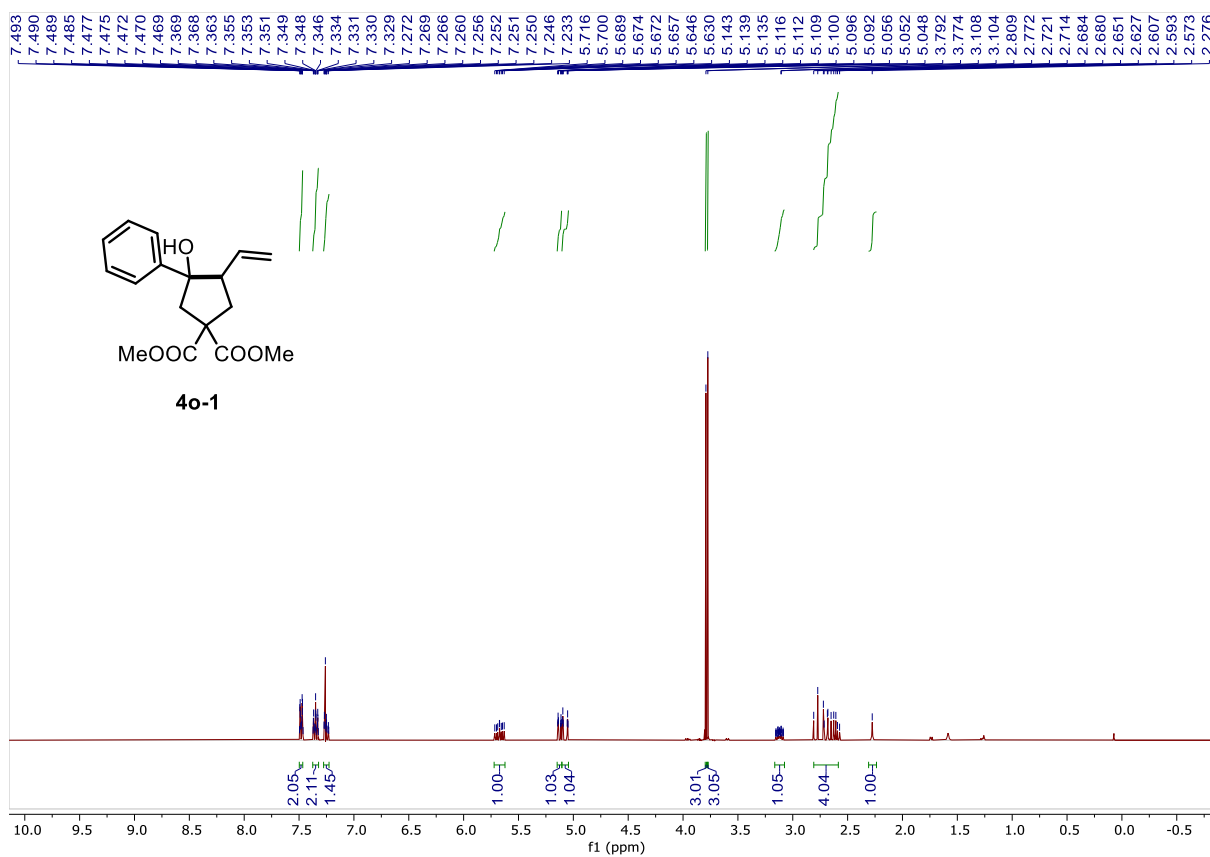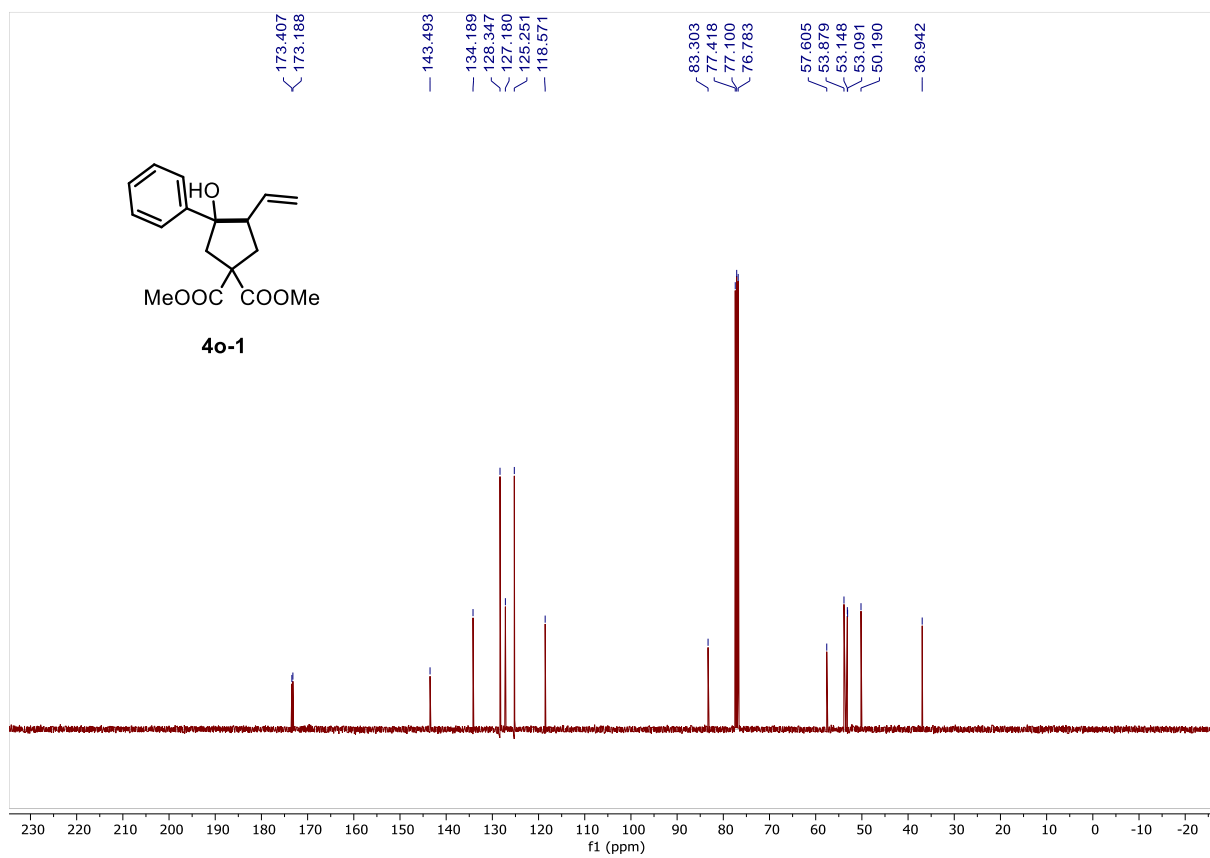



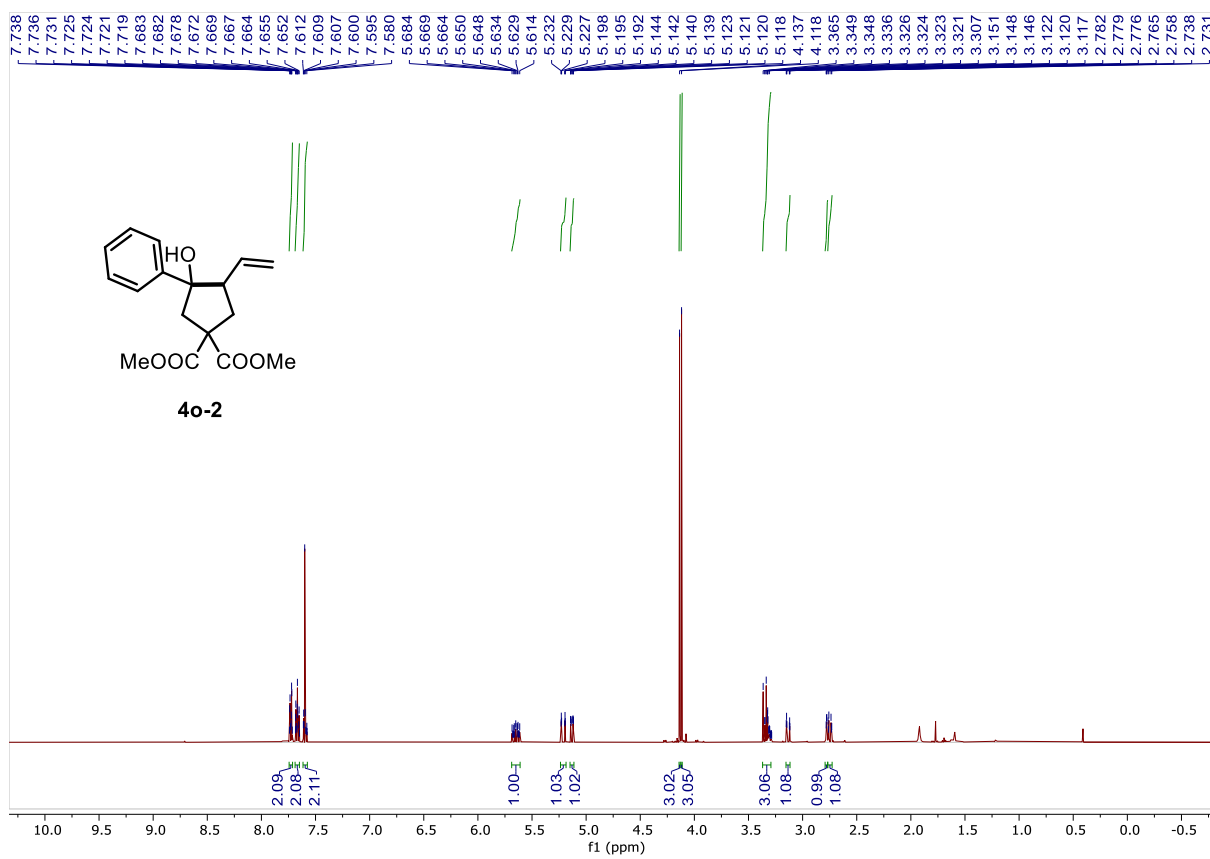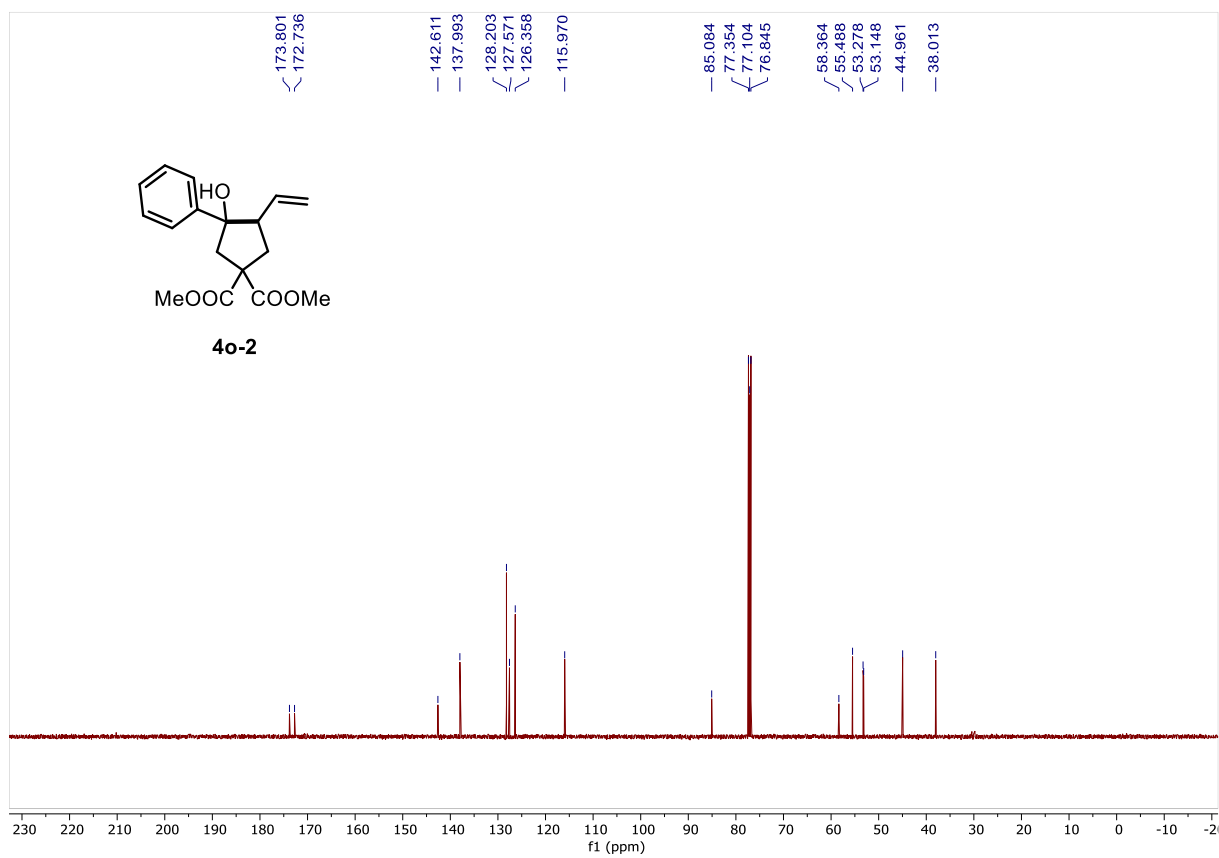

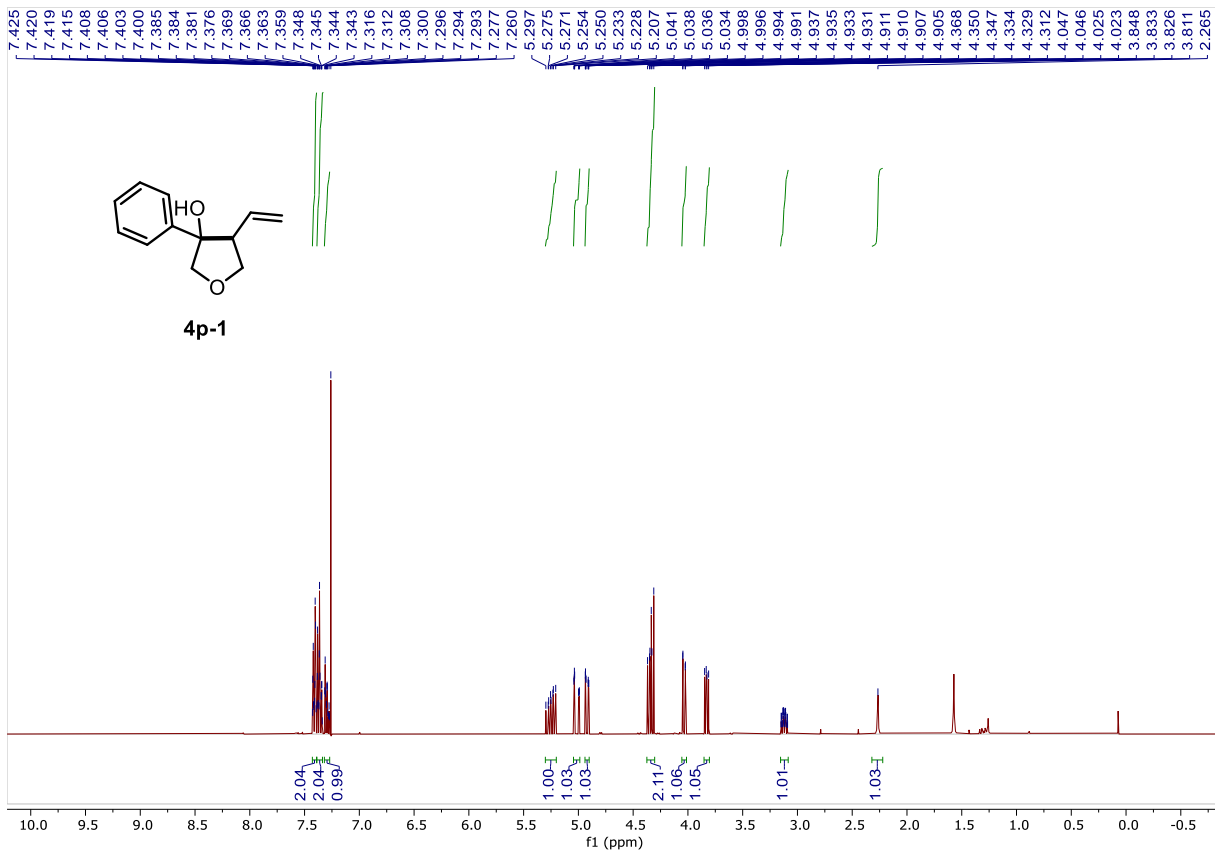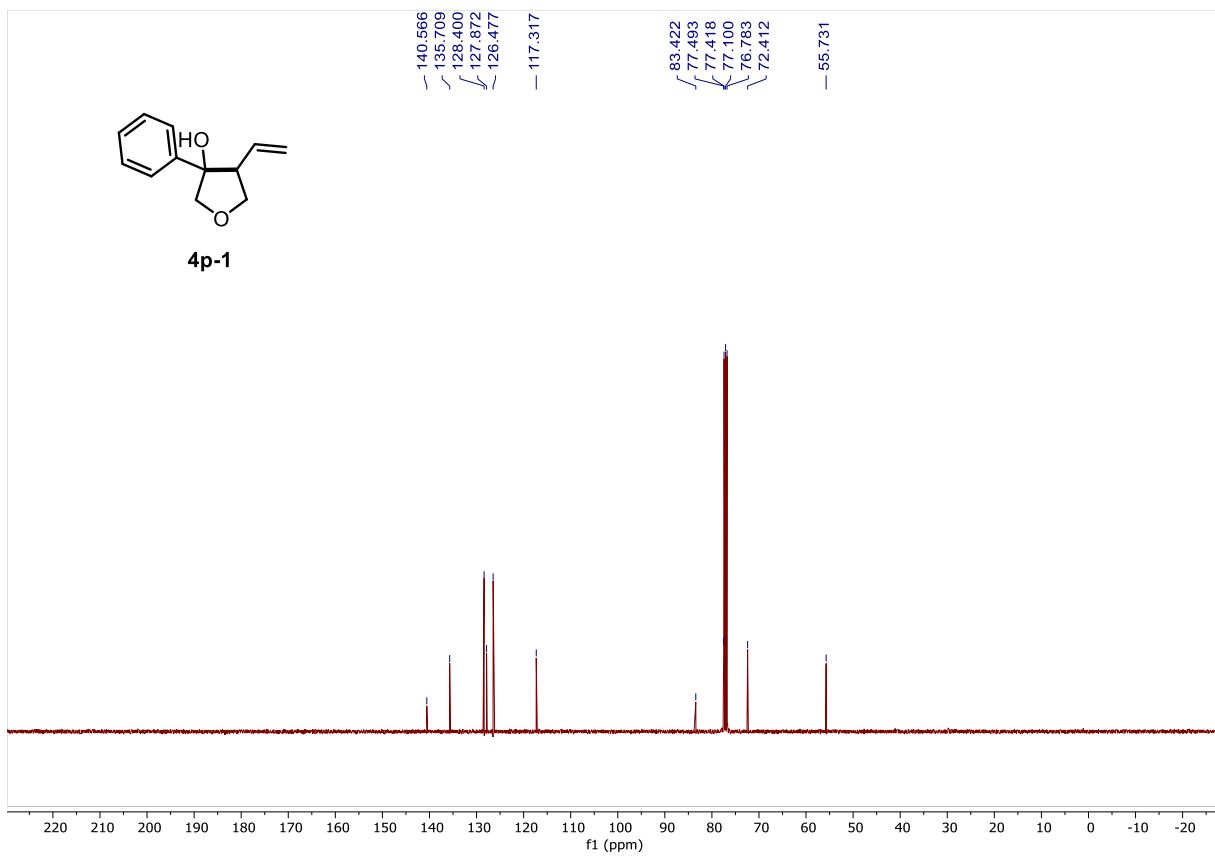

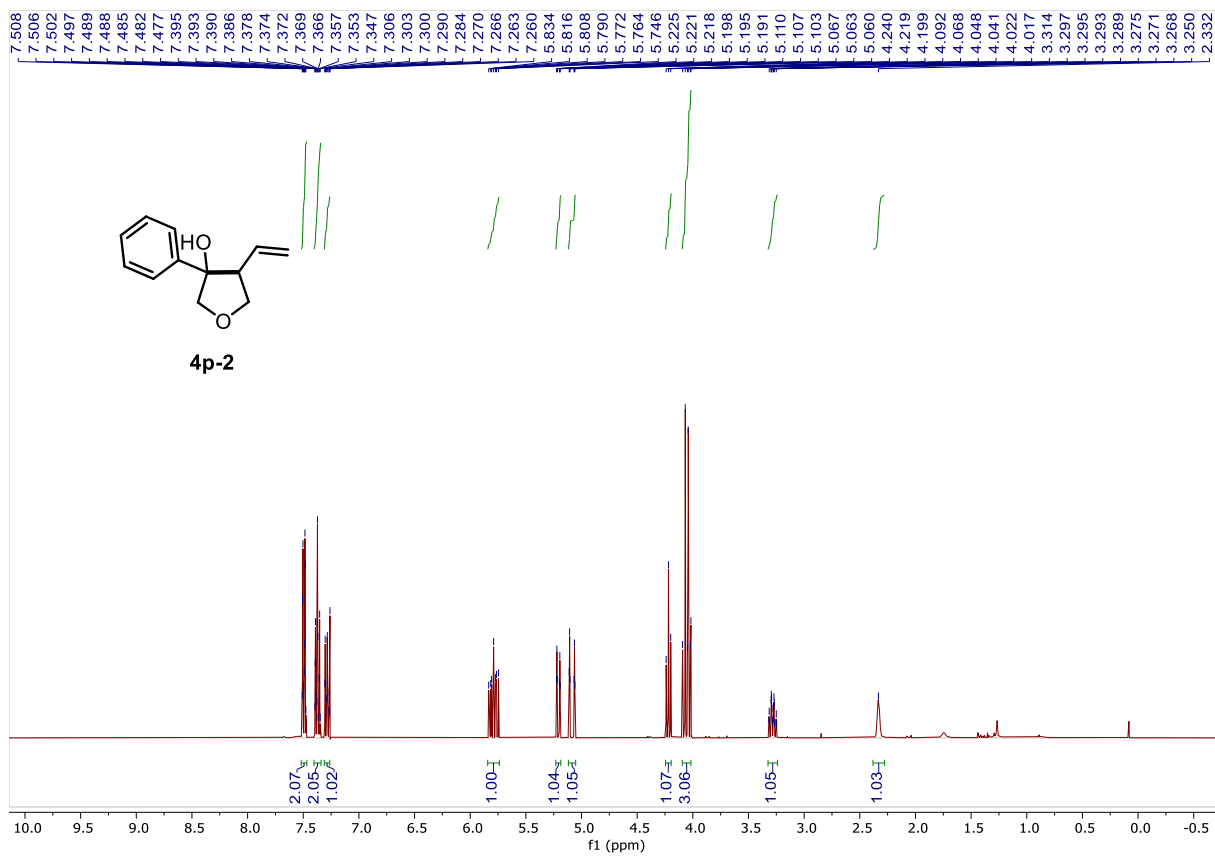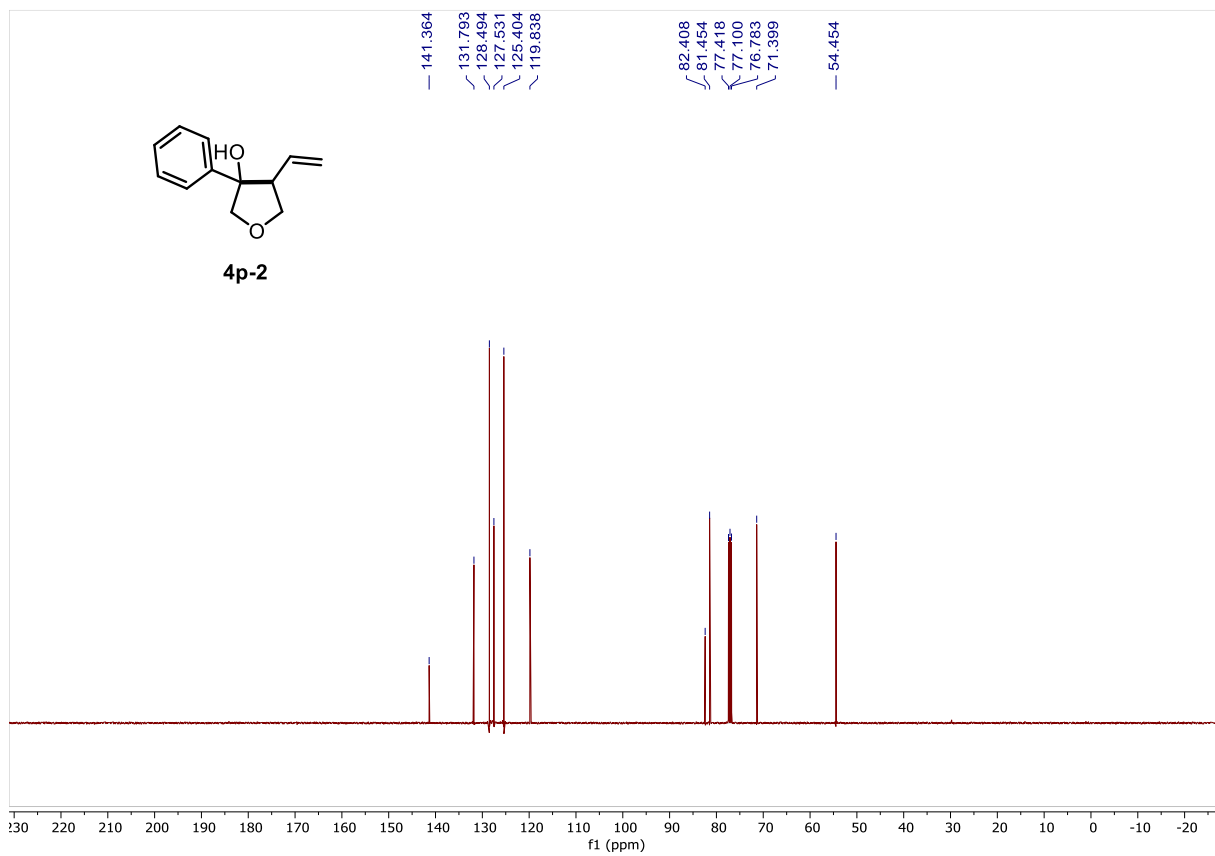

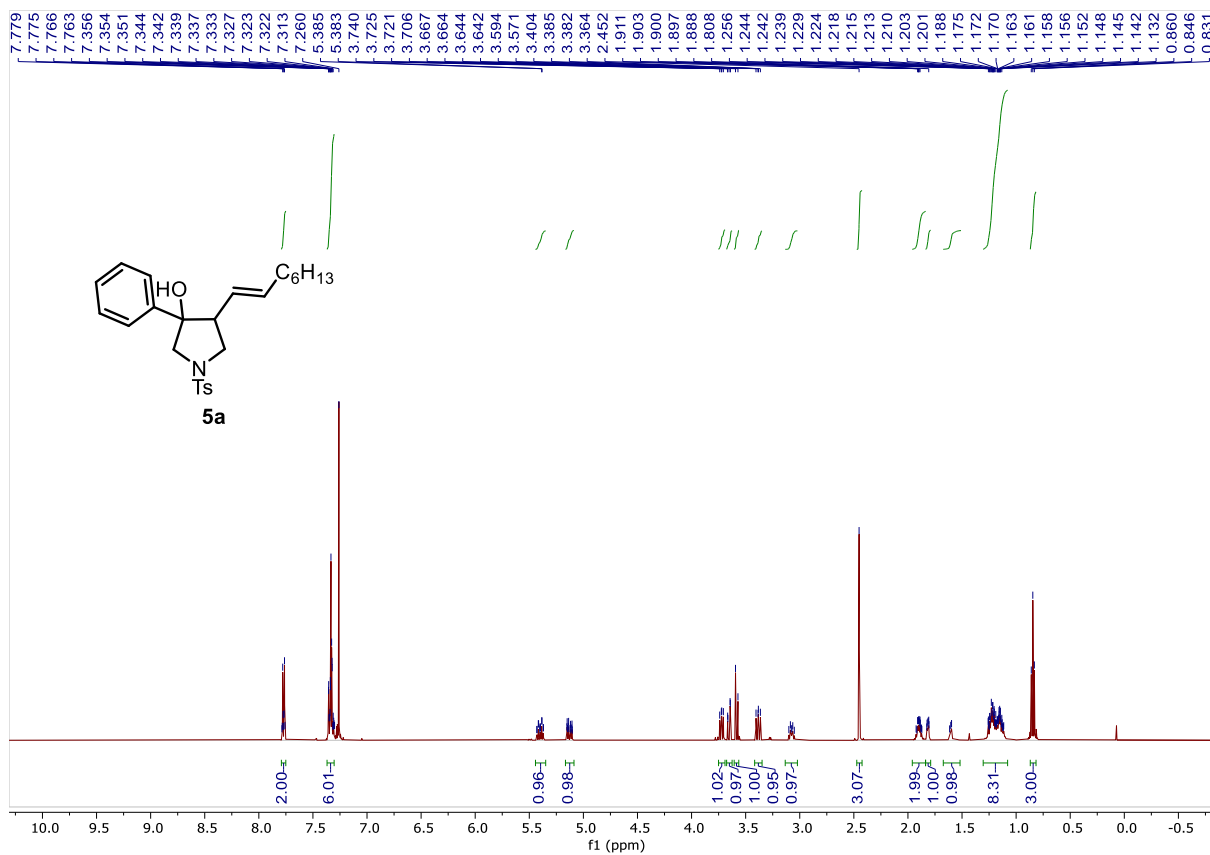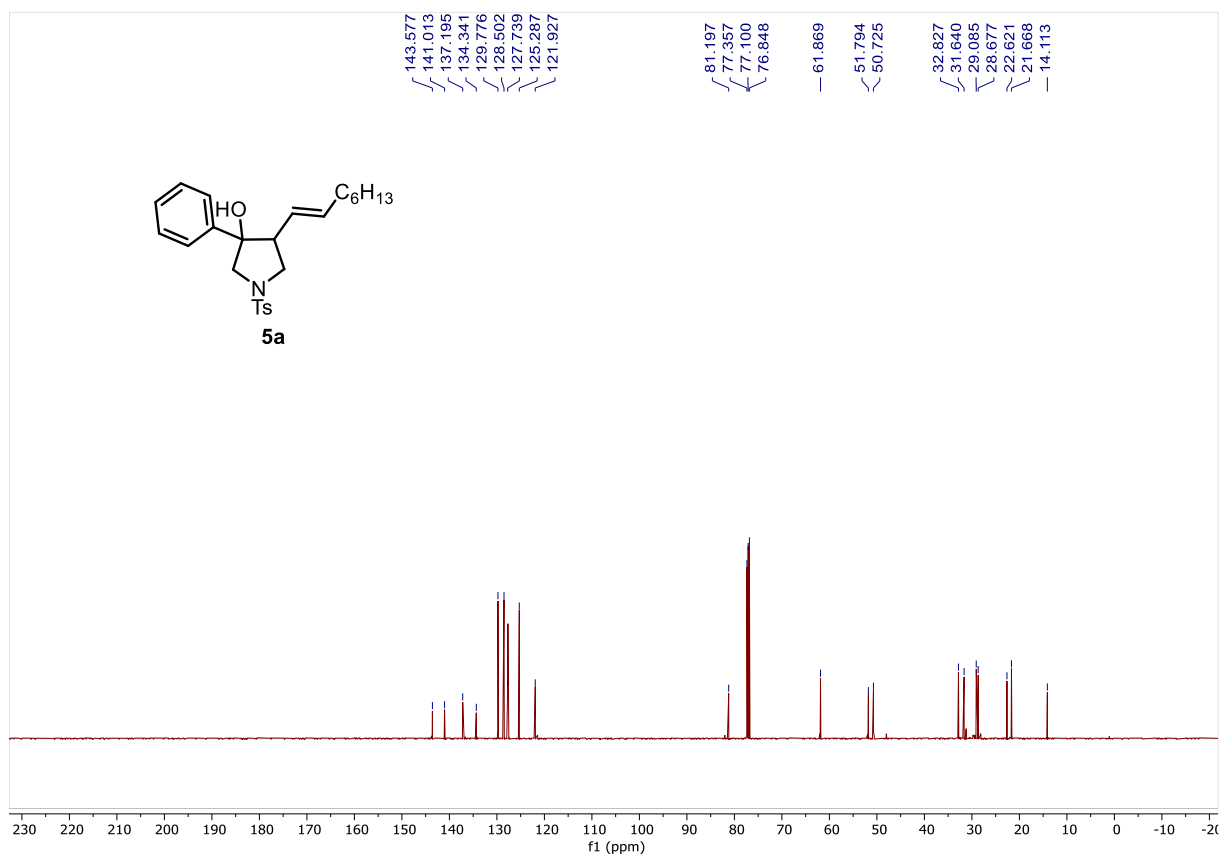

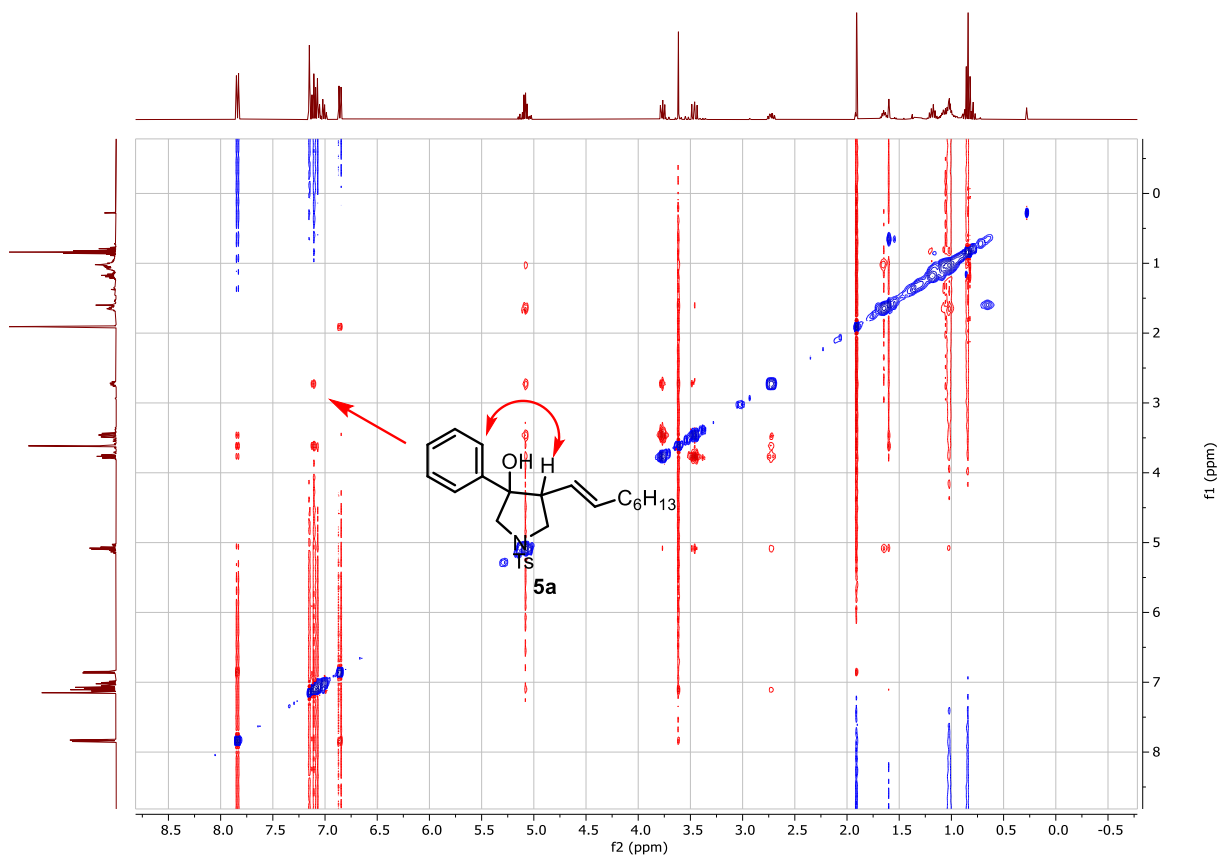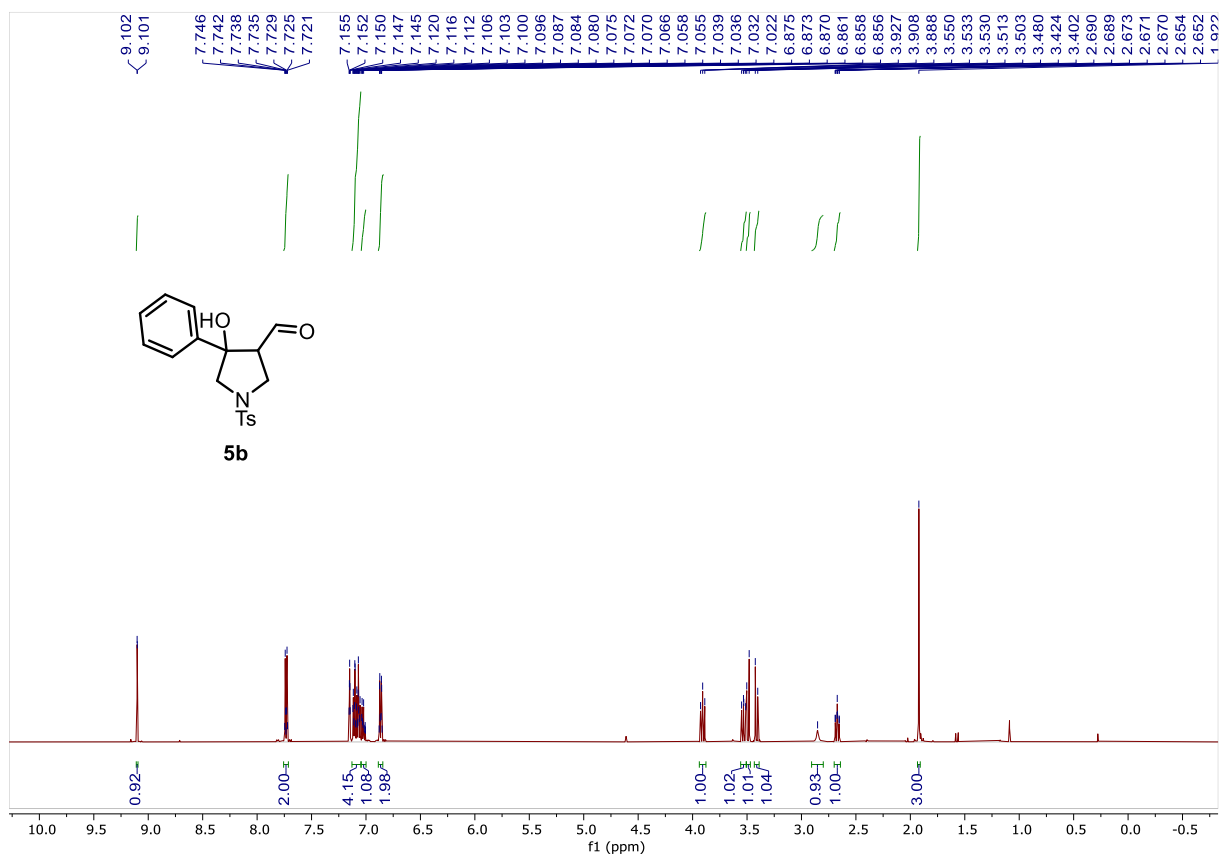

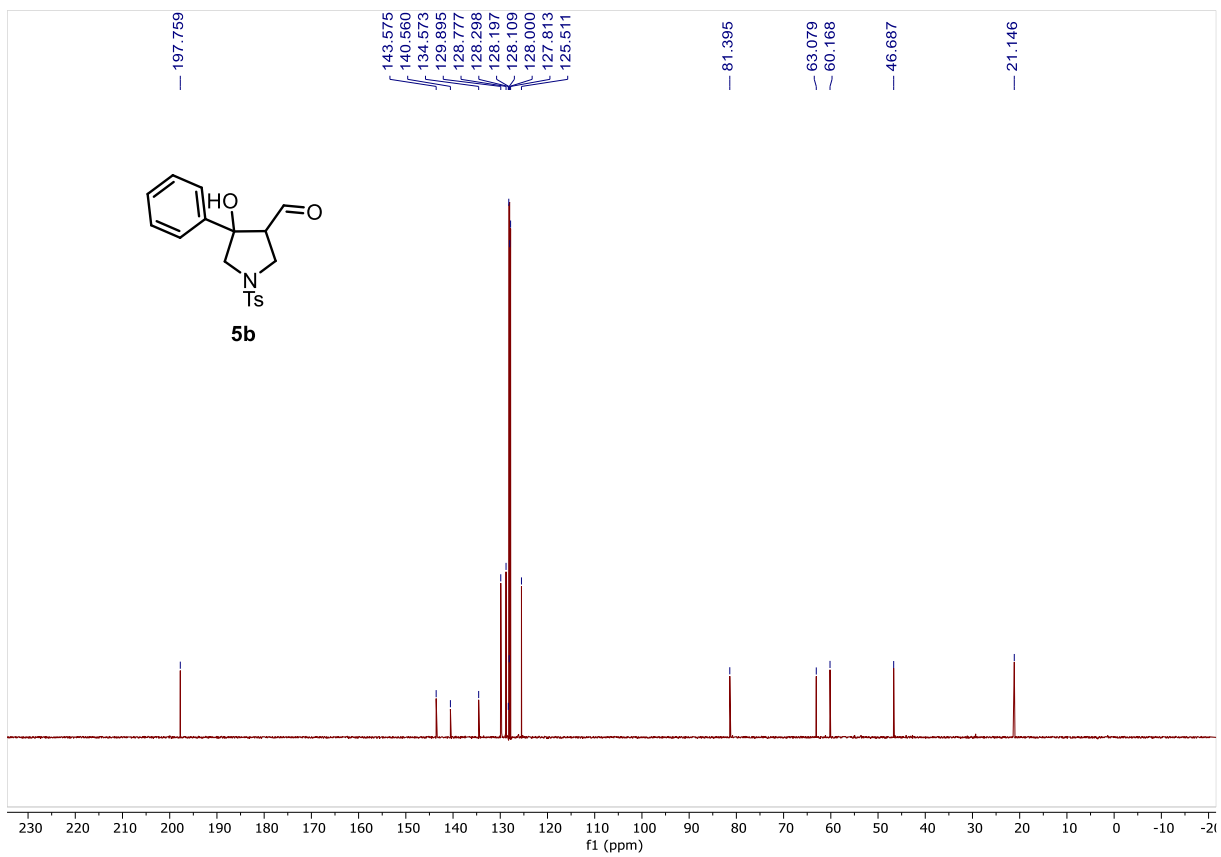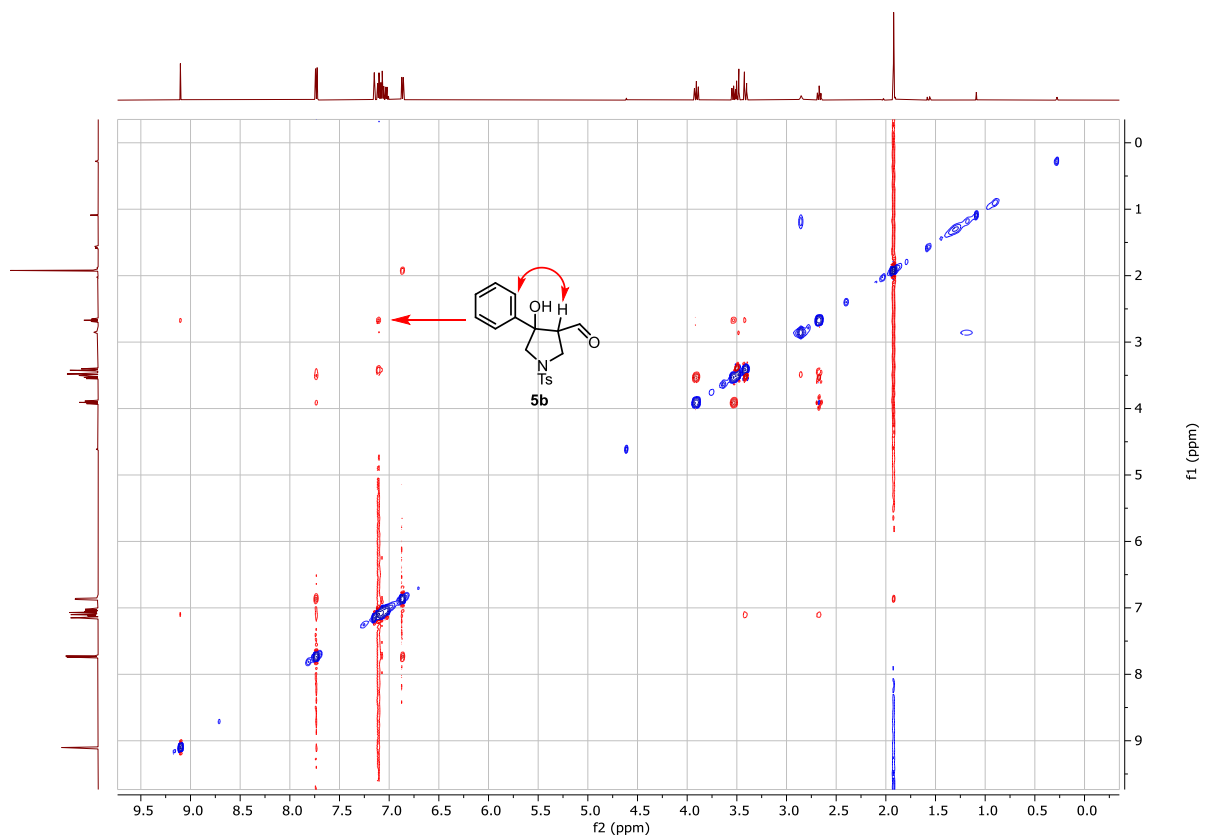

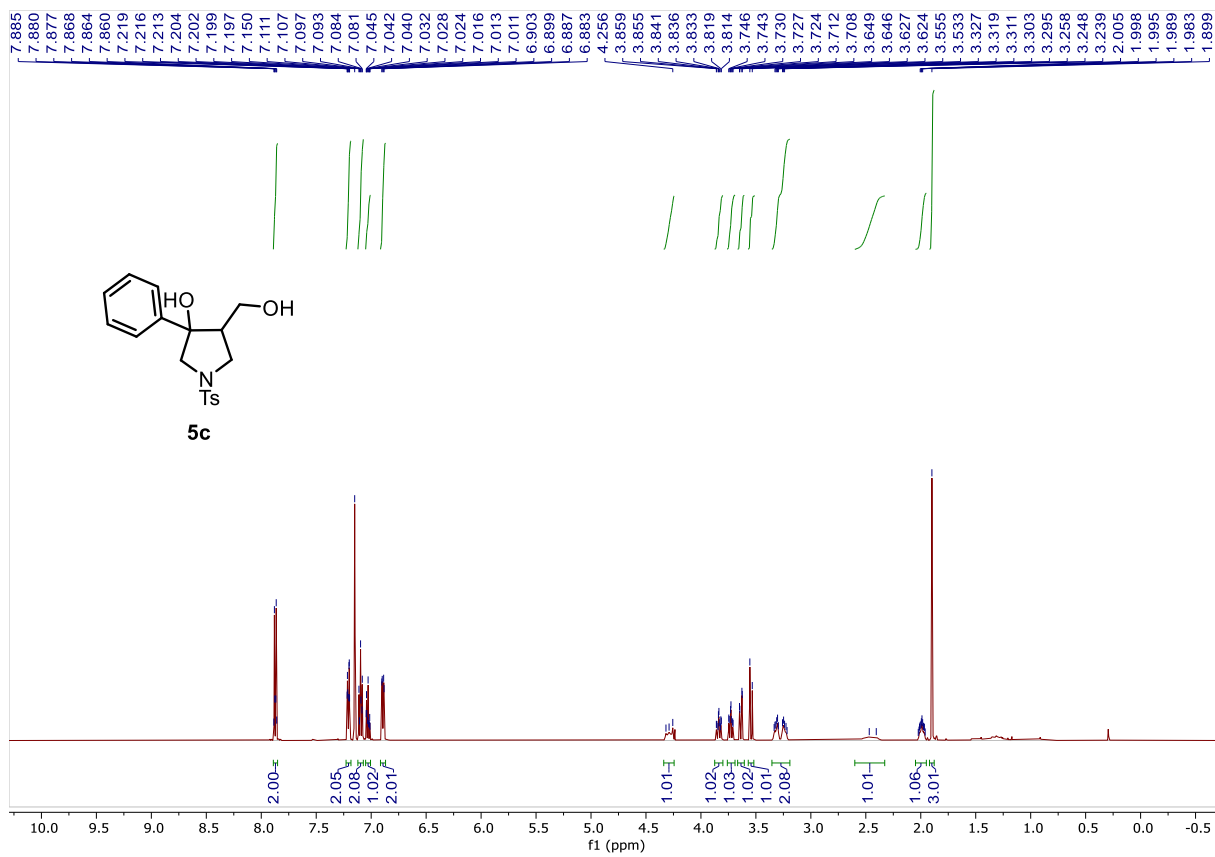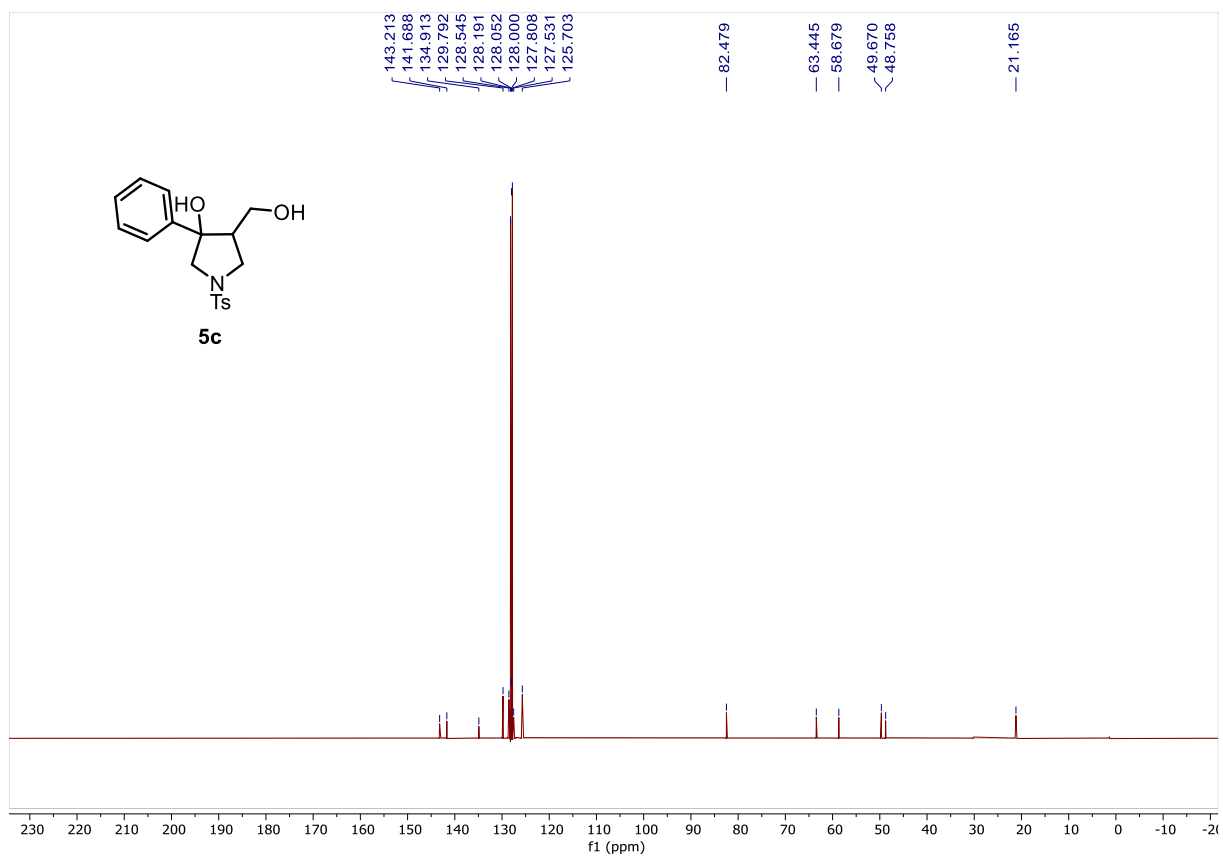

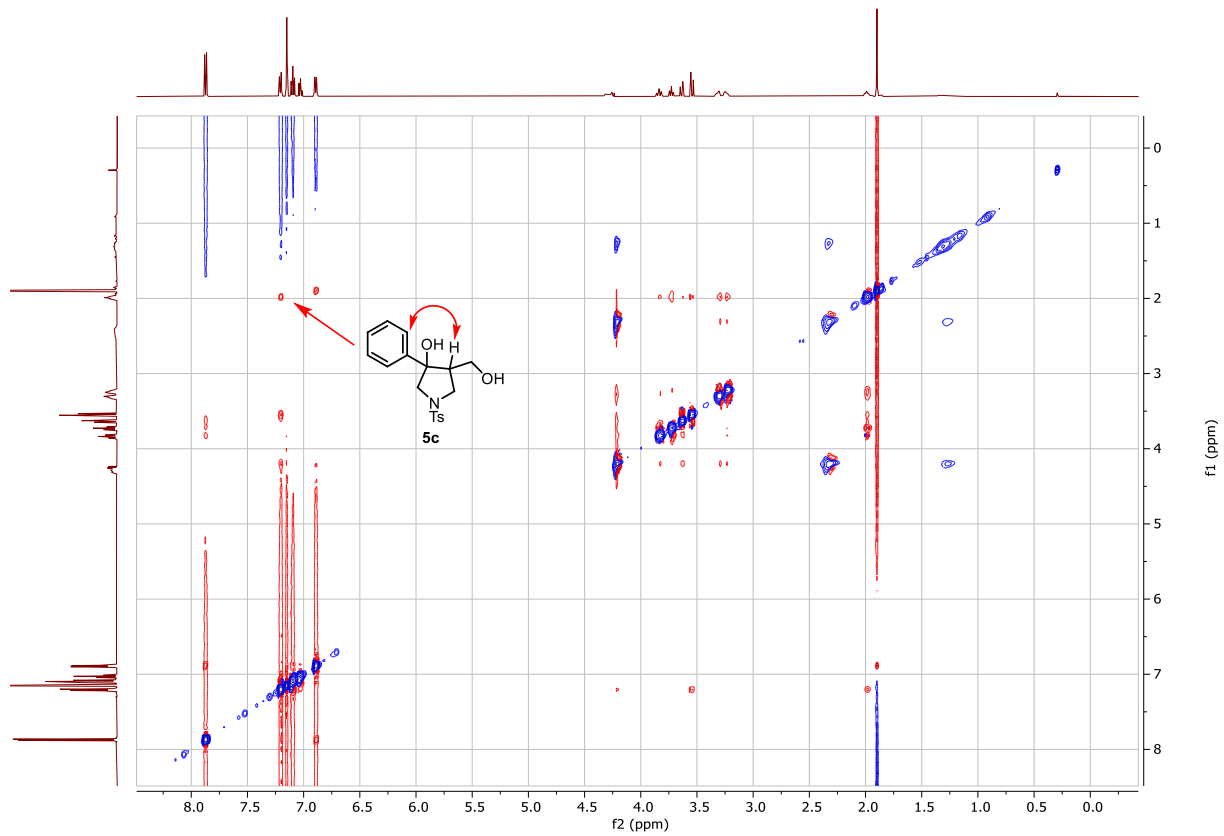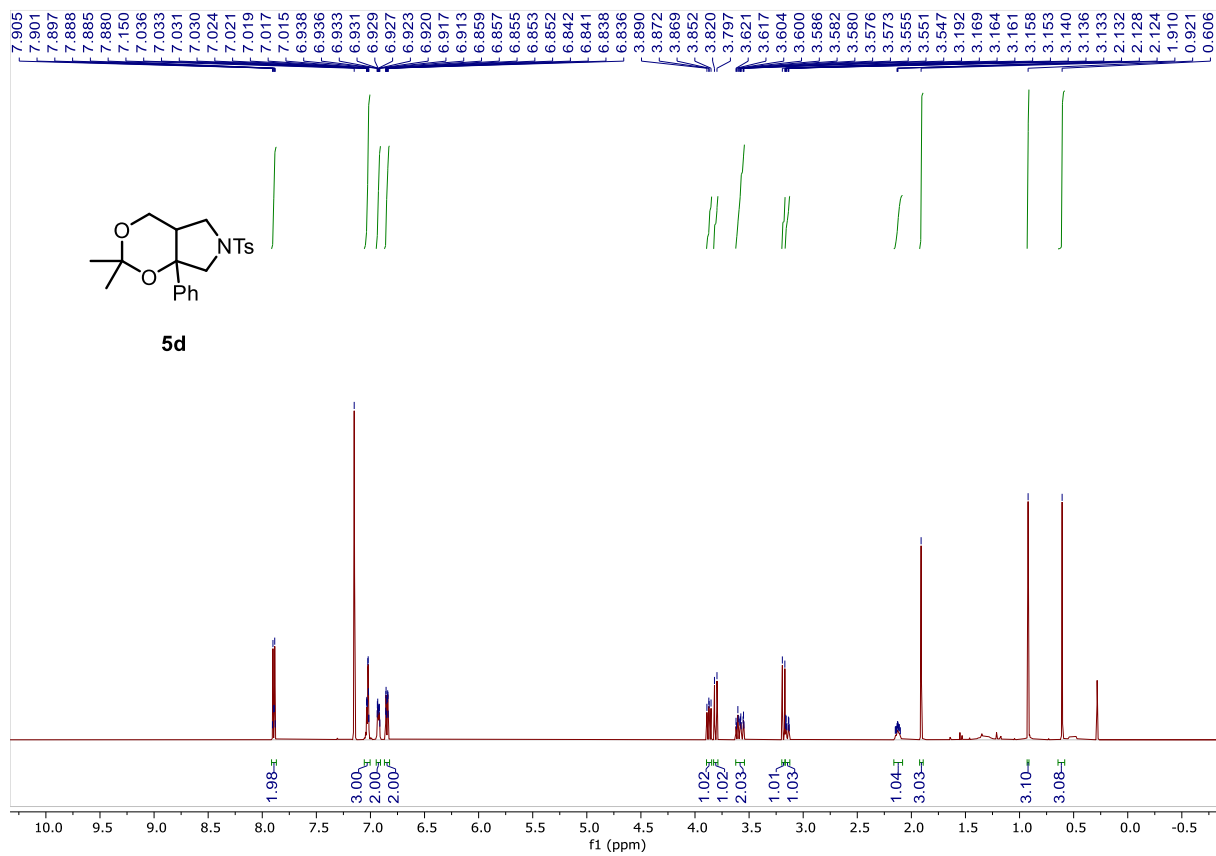



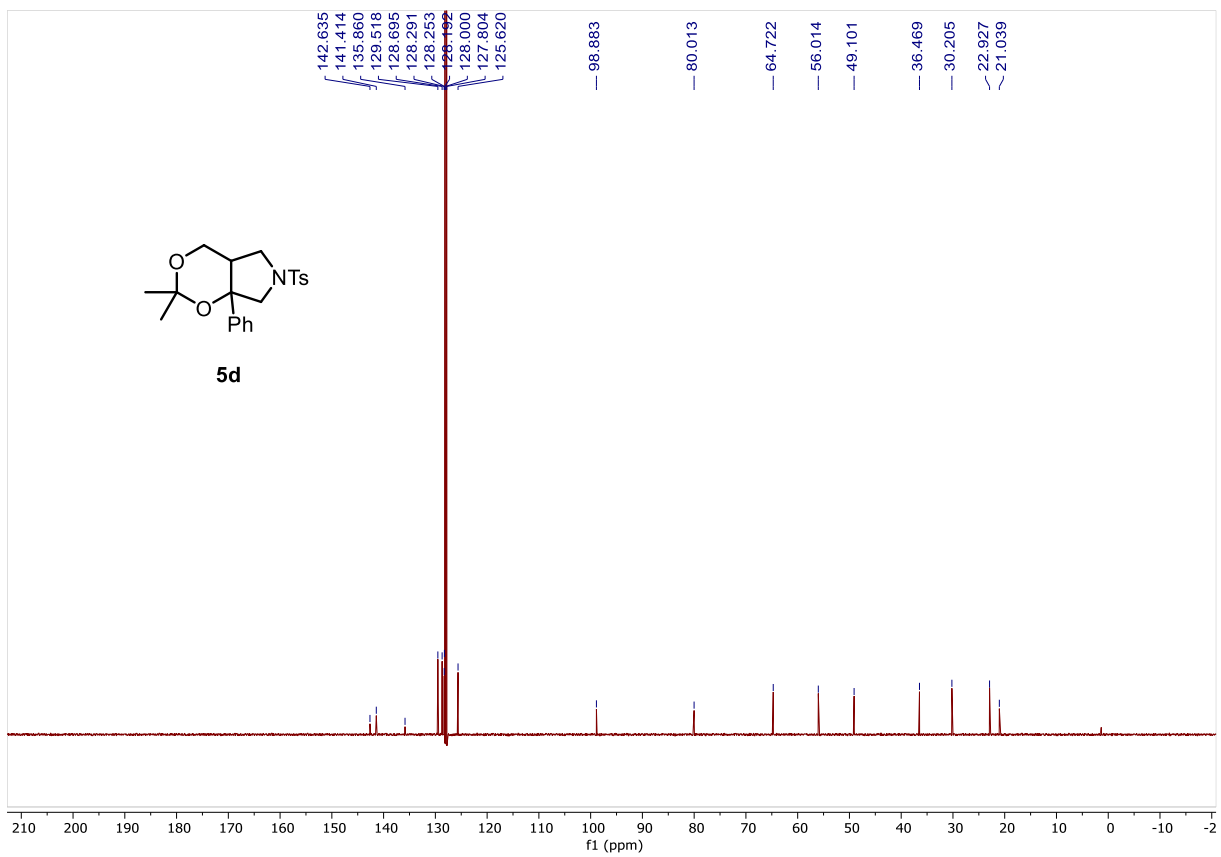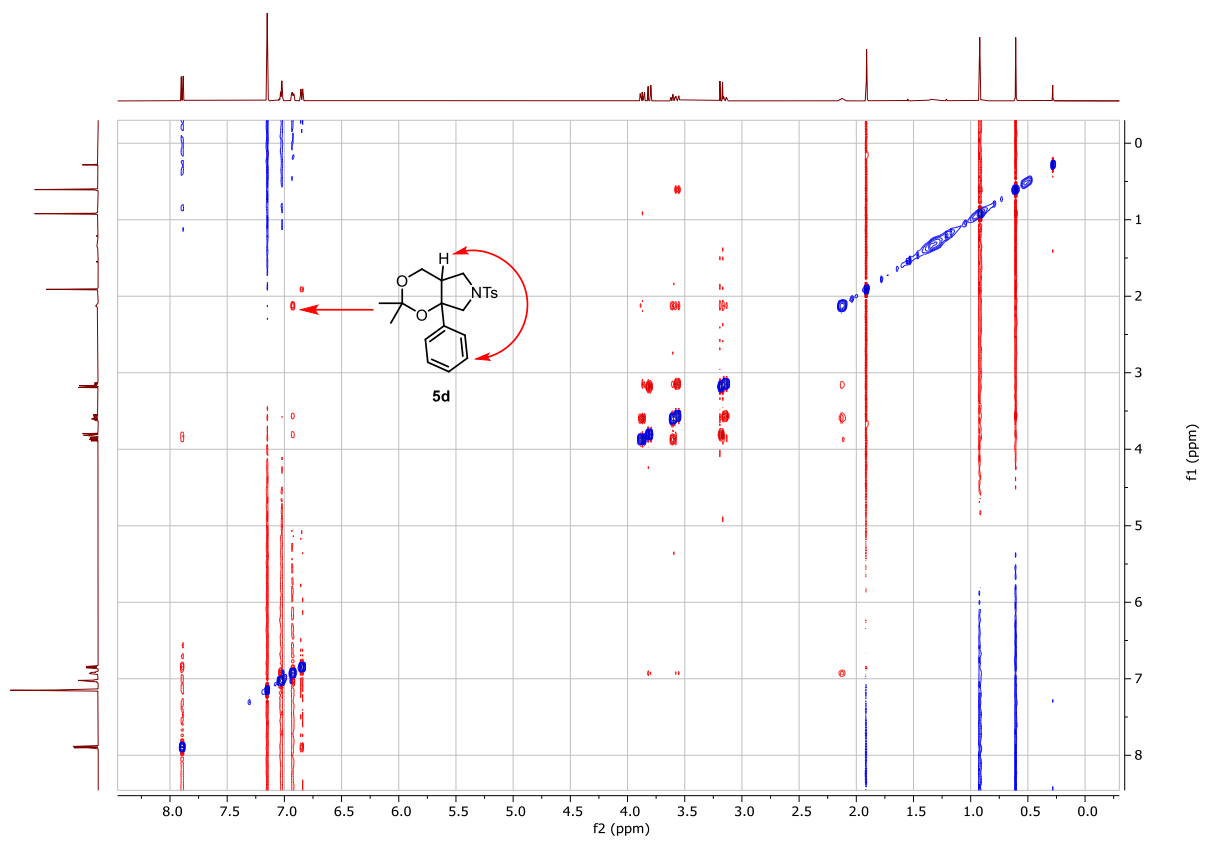

Supplement: d2cc06972e1.pdf [file d2cc06972e1.pdf]
